# Supplementary material for: PlantTribes2: Tools for comparative gene family analysis in plant genomics
Source: Front Plant Sci. 2023 Jan 31;13:1011199. doi: 10.3389/fpls.2022.1011199 (PMC9928214; doi:10.3389/fpls.2022.1011199)
Supplement: Supplementary file 1 [file Table_1.xlsx]

## Sheet: SupTable1.Galaxy Tool Shed
Supplemental Table 1. PlantTribes Tools and corresponding Galaxy Tool Shed links
AssemblyPostProcessor: post-processes de novo transcriptome assembly (Galaxy Tool Shed: https://toolshed.g2.bx.psu.edu/view/greg/plant_tribes_assembly_post_processor/9c72c91d291f)
GeneFamilyClassifier: classifies gene sequences into pre-computed orthologous gene family clusters (Galaxy Tool Shed: https://toolshed.g2.bx.psu.edu/view/greg/plant_tribes_gene_family_classifier/0916fe9ef46f)
GeneFamilyIntegrator: integrates gene models in pre-computed orthologous gene family clusters with classified gene coding sequences (Galaxy Tool Shed: https://toolshed.g2.bx.psu.edu/view/greg/plant_tribes_gene_family_integrator/a4009bf30e70)
GeneFamilyAligner: aligns integrated orthologous gene family clusters (Galaxy Tool Shed: https://toolshed.g2.bx.psu.edu/view/greg/plant_tribes_gene_family_aligner/79ea0eef1942)
GeneFamilyPhylogenyBuilder: builds phylogenetic trees of aligned orthologous gene family clusters (Galaxy Tool Shed: https://toolshed.g2.bx.psu.edu/view/greg/plant_tribes_gene_family_phylogeny_builder/800402ed6eb7)
KaKsAnalysis: estimates paralogous and orthologous pairwise synonymous (Ks) and non-synonymous (Ka) substitution rates (Galaxy Tool Shed: https://toolshed.g2.bx.psu.edu/view/greg/plant_tribes_kaks_analysis/84615d553d44)
KsDistribution: plots the distribution of synonymous substitution (Ks) rates and fits significant components (Galaxy Tool Shed: https://toolshed.g2.bx.psu.edu/view/greg/plant_tribes_ks_distribution/dc4e4a1b3676)
PlantTribes Administration Tools:
PlantTribesScaffoldsDownloader: installs scaffolds data and corresponding configuration files into the Galaxy file system for use by the PlantTribes tools (Galaxy Tool Shed: https://toolshed.g2.bx.psu.edu/view/iuc/data_manager_plant_tribes_scaffolds_downloader/5833ef61c1f8)
GeneFamilyScaffoldLoader: analyzes a PlantTribes scaffold and inserts information about it into the Galaxy PlantTribes database described here https://github.com/gregvonkuster/galaxy_tools/blob/master/galaxy/README (Galaxy Tool Shed: https://toolshed.g2.bx.psu.edu/view/greg/plant_tribes_gene_family_scaffold_loader/f56e20e010e2)
GeneFamilyScaffoldUpdater: adds a new genome to a scaffold installed into Galaxy by the PlantTribesScaffoldsDownloader (Galaxy Tool Shed: https://toolshed.g2.bx.psu.edu/view/greg/plant_tribes_gene_family_scaffold_updater/2b0906489073)

## Sheet: SupTable2.Scaffolding genomes
Supplemental Table 2: Genomes and methods used for buidling the PlantTribes2 scaffolds
12Gv1.0	orthomcl v2.0.9
Core Eudicots	Basal Eudicots	Monocots	Monocots	Monocots	Monocots	Monocots	Monocots	Monocots	Monocots	Monocots	Basal Angiosperms
Vitis vinifera	Nelumbo nucifera	Setaria italica	Sorghum bicolor	Oryza sativa	Phyllostachys heterocycla	Aegilops tauschii	Brachypodium distachyon	Musa acuminata	Elaeis guineensis	Spirodella polyrhiza	Amborella trichopoda
22Gv1.0	orthofinder v0.2.0, orthomcl v2.0-beta-6, gfam v1
Core Eudicots	Core Eudicots	Core Eudicots	Core Eudicots	Core Eudicots	Core Eudicots	Core Eudicots	Core Eudicots	Core Eudicots	Core Eudicots	Core Eudicots	Core Eudicots	Basal Eudicots	Basal Eudicots	Monocots	Monocots	Monocots	Monocots	Monocots	Basal Angiosperms	Lycophytes	Bryophytes
Populus trichocarpa	Medicago truncatula	Glycine max	Fragaria vesca	Arabidopsis thaliana	Thellungiella parvula	Carica papaya	Theobroma cacao	Vitis vinifera	Mimulus guttatus	Solanum lycopersicum	Solanum tuberosum	Aquilegia coerulea	Nelumbo nucifera	Sorghum bicolor	Oryza sativa	Brachypodium distachyon	Musa acuminata	Phoenix dactylifera	Amborella trichopoda	Selaginella moellendorffii	Physcomitrella patens
22Gv1.1	orthofinder v0.2.7, orthomcl v2.0.9, gfam v1.2
Core Eudicots	Core Eudicots	Core Eudicots	Core Eudicots	Core Eudicots	Core Eudicots	Core Eudicots	Core Eudicots	Core Eudicots	Core Eudicots	Core Eudicots	Core Eudicots	Basal Eudicots	Basal Eudicots	Monocots	Monocots	Monocots	Monocots	Monocots	Basal Angiosperms	Lycophytes	Bryophytes
Populus trichocarpa	Medicago truncatula	Glycine max	Fragaria vesca	Arabidopsis thaliana	Thellungiella parvula	Carica papaya	Theobroma cacao	Vitis vinifera	Mimulus guttatus	Solanum lycopersicum	Solanum tuberosum	Aquilegia coerulea	Nelumbo nucifera	Sorghum bicolor	Oryza sativa	Brachypodium distachyon	Musa acuminata	Phoenix dactylifera	Amborella trichopoda	Selaginella moellendorffii	Physcomitrella patens
26Gv1.0	orthomcl v2.0.9
Core Eudicots	Core Eudicots	Core Eudicots	Core Eudicots	Core Eudicots	Core Eudicots	Core Eudicots	Core Eudicots	Core Eudicots	Core Eudicots	Core Eudicots	Core Eudicots	Core Eudicots	Core Eudicots	Core Eudicots	Basal Eudicots	Basal Eudicots	Monocots	Monocots	Monocots	Monocots	Monocots	Basal Angiosperms	Gymnosperm	Lycophytes	Bryophytes
Phaseolus vulgaris	Medicago truncatula	Prunus persica	Manihot esculenta	Populus trichocarpa	Arabidopsis thaliana	Carica papaya	Theobroma cacao	Eucalyptus grandis	Vitis vinifera	Striga asiatica	Mimulus guttatus	Utricularia gibba	Solanum lycopersicum	Beta vulgaris	Aquilegia coerulea	Nelumbo nucifera	Sorghum bicolor	Oryza sativa	Musa acuminata	Elaeis guineensis	Spirodella polyrhiza	Amborella trichopoda	Pinus taeda	Selaginella moellendorffii	Physcomitrella patens
26Gv2.0	orthofinder v1.1.8
Core Eudicots	Core Eudicots	Core Eudicots	Core Eudicots	Core Eudicots	Core Eudicots	Core Eudicots	Core Eudicots	Core Eudicots	Core Eudicots	Core Eudicots	Core Eudicots	Core Eudicots	Core Eudicots	Core Eudicots	Basal Eudicots	Basal Eudicots	Monocots	Monocots	Monocots	Monocots	Monocots	Basal Angiosperms	Gymnosperm	Lycophytes	Bryophytes
Phaseolus vulgaris	Medicago truncatula	Prunus persica	Manihot esculenta	Populus trichocarpa	Arabidopsis thaliana	Carica papaya	Theobroma cacao	Eucalyptus grandis	Vitis vinifera	Striga asiatica	Mimulus guttatus	Utricularia gibba	Solanum lycopersicum	Beta vulgaris	Aquilegia coerulea	Nelumbo nucifera	Sorghum bicolor	Oryza sativa	Musa acuminata	Elaeis guineensis	Spirodella polyrhiza	Amborella trichopoda	Pinus taeda	Selaginella moellendorffii	Physcomitrella patens
37Gv1.0	orthofider v2.1.2
Core Eudicots	Core Eudicots	Core Eudicots	Core Eudicots	Core Eudicots	Core Eudicots	Core Eudicots	Core Eudicots	Core Eudicots	Core Eudicots	Core Eudicots	Core Eudicots	Core Eudicots	Core Eudicots	Core Eudicots	Basal Eudicots	Basal Eudicots	Monocots	Monocots	Monocots	Monocots	Monocots	Monocots	Monocots	Monocots	Monocots	Monocots	Basal Angiosperms	Basal Angiosperms	Basal Angiosperms	Gymnosperms	Gymnosperm	Gymnosperms	Polypodiopsida	Lycophytes	Bryophytes	Bryophytes
Arabidopsis thaliana	Theobroma cacao	Citrus sinensis	Eucalyptus grandis	Phaseolus vulgaris	Medicago truncatula	Populus trichocarpa	Vitis vinifera	Kalanchoe fedtschenkoi	Daucus carota	Lactuca sativa	Solanum lycopersicum	Coffea canephora	Mimulus guttatus	Spinacia oleracea	Aquilegia coerulea	Nelumbo nucifera	Setaria italica	Sorghum bicolor	Oryza sativa	Brachypodium distachyon	Ananas comosus	Musa acuminata	Elaeis guineensis	Apostasia shenzhenica	Asparagus officinalis	Dioscorea rotundata	Cinnamomum kanehirae	Nymphaea caerulea	Amborella trichopoda	Gnetum Montanum	Pinus taeda	Ginkgo biloba	Azolla filiculoides	Selaginella moellendorffii	Marchantia polymorpha	Physcomitrella patens
Note: Default parameters were used for each clustering software

## Sheet: SupTable3.test dataset details
Supplemental Table 3: detailed description on the test dataset
Dataset	Description
assembly.fasta	a sub-set of a plant transcriptome de novo assembly
targetOrthos.ids	a list of targeted single-copy genes orthogroup identifiers corresponding to the PlantTribes 2 22Gv1.1 gene family scaffold
species1.fna	a sub-set of coding sequences (CDS) for the first species for estimating paralogous and orthologous pairwise synonymous (Ks) and non-synonymous (Ka) substitution rates
species1.faa	corresponding protein sequences for the first species for estimating paralogous and orthologous pairwise synonymous (Ks) and non-synonymous (Ka) substitution rates
species2.fna	a sub-set of coding sequences (CDS) for the second species for estimating paralogous and orthologous pairwise synonymous (Ks) and non-synonymous (Ka) substitution rates
species2.faa	corresponding protein sequences for the second species for estimating paralogous and orthologous pairwise synonymous (Ks) and non-synonymous (Ka) substitution rates

## Sheet: SupTable4.BUSCO of assemblies
Supplemental Table 4: BUSCO completeness accessments on transcriptome assemblies. Values in row 17, 18, 19 were used to plot Figure 6 in the main text.
	Phelipanche aegyptiaca			Striga hermonthica			Triphysaria versicolor
Assemblies	Complete	Fragmented	Missing	Complete	Fragmented	Missing	Complete	Fragmented	Missing
Stage 0	0.282	0.176	0.542	0.464	0.168	0.368	0.421	0.167	0.412
Stage 1	0.229	0.153	0.618	0.697	0.114	0.189	0.525	0.169	0.306
Stage 2	0.303	0.165	0.532	0.613	0.151	0.236	0.592	0.156	0.252
Stage 3	0.553	0.093	0.354	0.564	0.154	0.282	0.515	0.158	0.327
Stage 4	NA	NA	NA	0.568	0.162	0.27	NA	NA	NA
Stage 4.1	0.61	0.092	0.298	NA	NA	NA	0.291	0.182	0.527
Stage 4.2	0.54	0.103	0.357	NA	NA	NA	NA	NA	NA
Stage 5.1	0.387	0.141	0.472	0.702	0.097	0.201	NA	NA	NA
Stage 5.2	0.455	0.107	0.438	0.516	0.151	0.333	NA	NA	NA
Stage 6.1	0.315	0.156	0.529	0.571	0.144	0.288	0.728	0.096	0.176
Stage 6.2	0.419	0.146	0.435	0.673	0.123	0.204	0.645	0.123	0.232
Stage 6.3	NA	NA	NA	NA	NA	NA	0.601	0.133	0.266
Average of Stage Assemblies	0.4093	0.1332	0.4575	0.596444	0.140444	0.263444	0.53975	0.148	0.31225
Combined assembly	0.702	0.093	0.205	0.846	0.059	0.095	0.877	0.051	0.072
meta-assembly	0.775	0.024	0.201	0.913	0.022	0.065	0.894	0.026	0.08

## Sheet: SupTable5.PIN8a_VDAC_GFF
Supplemental Table 5: Gene feature information for the PIN8a and VDAC genes from genomes of interest in Figure 7.
#########################################################################################################
Target genome: Malus domestica GDDH13
Genes: MD09G1047200 (VDAC); MD09G1047300 (PIN8a)
Source: Genome Database for Rosaceae (GDR)
#########################################################################################################
Chr09	IRHS-2017	mRNA	3093747	3096449	.	-	.	ID=mRNA:MD09G1047200;Name=MD09G1047200;Parent=gene:MD09G1047200
Chr09	IRHS-2017	exon	3093747	3094424	.	-	.	ID=exon:MD09G1047200.6;Parent=mRNA:MD09G1047200
Chr09	IRHS-2017	exon	3094538	3094746	.	-	0	ID=exon:MD09G1047200.5;Parent=mRNA:MD09G1047200
Chr09	IRHS-2017	exon	3094907	3094993	.	-	0	ID=exon:MD09G1047200.4;Parent=mRNA:MD09G1047200
Chr09	IRHS-2017	exon	3095264	3095374	.	-	0	ID=exon:MD09G1047200.3;Parent=mRNA:MD09G1047200
Chr09	IRHS-2017	exon	3096052	3096119	.	-	2	ID=exon:MD09G1047200.2;Parent=mRNA:MD09G1047200
Chr09	IRHS-2017	exon	3096250	3096449	.	-	0	ID=exon:MD09G1047200.1;Parent=mRNA:MD09G1047200
Chr09	IRHS-2017	three_prime_UTR	3093747	3094117	.	-	.	ID=three_prime_UTR:MD09G1047200.0;Parent=mRNA:MD09G1047200;est_cons=100.0;est_incons=0.0
Chr09	IRHS-2017	CDS	3094118	3094424	.	-	1	ID=CDS:MD09G1047200.6;Parent=mRNA:MD09G1047200;est_cons=100.0;est_incons=0.0
Chr09	IRHS-2017	CDS	3094538	3094746	.	-	0	ID=CDS:MD09G1047200.5;Parent=mRNA:MD09G1047200;est_cons=100.0;est_incons=0.0
Chr09	IRHS-2017	CDS	3094907	3094993	.	-	0	ID=CDS:MD09G1047200.4;Parent=mRNA:MD09G1047200;est_cons=100.0;est_incons=0.0
Chr09	IRHS-2017	CDS	3095264	3095374	.	-	0	ID=CDS:MD09G1047200.3;Parent=mRNA:MD09G1047200;est_cons=100.0;est_incons=0.0
Chr09	IRHS-2017	CDS	3096052	3096119	.	-	2	ID=CDS:MD09G1047200.2;Parent=mRNA:MD09G1047200;est_cons=100.0;est_incons=0.0
Chr09	IRHS-2017	CDS	3096250	3096295	.	-	Source: Genome Database for Rosaceae (GDR)	ID=CDS:MD09G1047200.1;Parent=mRNA:MD09G1047200;est_cons=100.0;est_incons=0.0
Chr09	IRHS-2017	five_prime_UTR	3096296	3096449	.	-	.	ID=five_prime_UTR:MD09G1047200.12;Parent=mRNA:MD09G1047200;est_cons=100.0;est_incons=0.0
Chr09	IRHS-2017	gene	3099049	3101173	.	-	.	ID=gene:MD09G1047300;Name=MD09G1047300;Note=Auxin efflux carrier family protein
Chr09	IRHS-2017	mRNA	3099049	3101173	.	-	.	ID=mRNA:MD09G1047300;Name=MD09G1047300;Parent=gene:MD09G1047300
Chr09	IRHS-2017	exon	3099049	3099439	.	-	.	ID=exon:MD09G1047300.6;Parent=mRNA:MD09G1047300
Chr09	IRHS-2017	exon	3099547	3099623	.	-	0	ID=exon:MD09G1047300.5;Parent=mRNA:MD09G1047300
Chr09	IRHS-2017	exon	3099700	3099857	.	-	2	ID=exon:MD09G1047300.4;Parent=mRNA:MD09G1047300
Chr09	IRHS-2017	exon	3099950	3100035	.	-	1	ID=exon:MD09G1047300.3;Parent=mRNA:MD09G1047300
Chr09	IRHS-2017	exon	3100113	3100287	.	-	2	ID=exon:MD09G1047300.2;Parent=mRNA:MD09G1047300
Chr09	IRHS-2017	exon	3100528	3101173	.	-	0	ID=exon:MD09G1047300.1;Parent=mRNA:MD09G1047300
Chr09	IRHS-2017	three_prime_UTR	3099049	3099372	.	-	.	ID=three_prime_UTR:MD09G1047300.0;Parent=mRNA:MD09G1047300;est_cons=100.0;est_incons=0.0
Chr09	IRHS-2017	CDS	3099373	3099439	.	-	1	ID=CDS:MD09G1047300.6;Parent=mRNA:MD09G1047300;est_cons=100.0;est_incons=0.0
Chr09	IRHS-2017	CDS	3099547	3099623	.	-	0	ID=CDS:MD09G1047300.5;Parent=mRNA:MD09G1047300;est_cons=100.0;est_incons=0.0
Chr09	IRHS-2017	CDS	3099700	3099857	.	-	2	ID=CDS:MD09G1047300.4;Parent=mRNA:MD09G1047300;est_cons=100.0;est_incons=0.0
Chr09	IRHS-2017	CDS	3099950	3100035	.	-	1	ID=CDS:MD09G1047300.3;Parent=mRNA:MD09G1047300;est_cons=100.0;est_incons=0.0
Chr09	IRHS-2017	CDS	3100113	3100287	.	-	2	ID=CDS:MD09G1047300.2;Parent=mRNA:MD09G1047300;est_cons=100.0;est_incons=0.0
Chr09	IRHS-2017	CDS	3100528	3101038	.	-	0	ID=CDS:MD09G1047300.1;Parent=mRNA:MD09G1047300;est_cons=100.0;est_incons=0.0
Chr09	IRHS-2017	five_prime_UTR	3101039	3101173	.	-	.	ID=five_prime_UTR:MD09G1047300.12;Parent=mRNA:MD09G1047300;est_cons=100.0;est_incons=0.0
#########################################################################################################
Target genome: Malus domestica Gala Haploid
Genes: Mdg_09g004100 (VDAC); Mdg_09g004110 (PIN8a)
Source: Genome Database for Rosaceae (GDR)
#########################################################################################################
chr9	maker	gene	2835201	2837477	.	-	.	ID=Mdg_09g004100;Name=Mdg_09g004100
chr9	maker	mRNA	2835201	2837477	.	-	.	ID=Mdg_09g004100-mRNA1;Parent=Mdg_09g004100
chr9	maker	exon	2835201	2835507	.	-	.	ID=Mdg_09g004100-mRNA1:exon;Parent=Mdg_09g004100-mRNA1
chr9	maker	exon	2835621	2835829	.	-	.	ID=Mdg_09g004100-mRNA1:exon;Parent=Mdg_09g004100-mRNA1
chr9	maker	exon	2835990	2836076	.	-	.	ID=Mdg_09g004100-mRNA1:exon;Parent=Mdg_09g004100-mRNA1
chr9	maker	exon	2836284	2836298	.	-	.	ID=Mdg_09g004100-mRNA1:exon;Parent=Mdg_09g004100-mRNA1
chr9	maker	exon	2836347	2836457	.	-	.	ID=Mdg_09g004100-mRNA1:exon;Parent=Mdg_09g004100-mRNA1
chr9	maker	exon	2837135	2837202	.	-	.	ID=Mdg_09g004100-mRNA1:exon;Parent=Mdg_09g004100-mRNA1
chr9	maker	exon	2837333	2837477	.	-	.	ID=Mdg_09g004100-mRNA1:exon;Parent=Mdg_09g004100-mRNA1
chr9	maker	five_prime_UTR	2837379	2837477	.	-	.	ID=Mdg_09g004100-mRNA1:five_prime_UTR;Parent=Mdg_09g004100-mRNA1
chr9	maker	CDS	2837333	2837378	.	-	0	ID=Mdg_09g004100-mRNA1:CDS;Parent=Mdg_09g004100-mRNA1
chr9	maker	CDS	2837135	2837202	.	-	2	ID=Mdg_09g004100-mRNA1:CDS;Parent=Mdg_09g004100-mRNA1
chr9	maker	CDS	2836347	2836457	.	-	0	ID=Mdg_09g004100-mRNA1:CDS;Parent=Mdg_09g004100-mRNA1
chr9	maker	CDS	2836284	2836298	.	-	0	ID=Mdg_09g004100-mRNA1:CDS;Parent=Mdg_09g004100-mRNA1
chr9	maker	CDS	2835990	2836076	.	-	0	ID=Mdg_09g004100-mRNA1:CDS;Parent=Mdg_09g004100-mRNA1
chr9	maker	CDS	2835621	2835829	.	-	0	ID=Mdg_09g004100-mRNA1:CDS;Parent=Mdg_09g004100-mRNA1
chr9	maker	CDS	2835201	2835507	.	-	1	ID=Mdg_09g004100-mRNA1:CDS;Parent=Mdg_09g004100-mRNA1
chr9	maker	gene	2840456	2842121	.	-	.	ID=Mdg_09g004110;Name=Mdg_09g004110
chr9	maker	mRNA	2840456	2842121	.	-	.	ID=Mdg_09g004110-mRNA1;Parent=Mdg_09g004110
chr9	maker	exon	2841611	2842121	.	-	.	ID=Mdg_09g004110-mRNA1:exon;Parent=Mdg_09g004110-mRNA1
chr9	maker	exon	2841196	2841370	.	-	.	ID=Mdg_09g004110-mRNA1:exon;Parent=Mdg_09g004110-mRNA1
chr9	maker	exon	2841033	2841118	.	-	.	ID=Mdg_09g004110-mRNA1:exon;Parent=Mdg_09g004110-mRNA1
chr9	maker	exon	2840783	2840940	.	-	.	ID=Mdg_09g004110-mRNA1:exon;Parent=Mdg_09g004110-mRNA1
chr9	maker	exon	2840630	2840706	.	-	.	ID=Mdg_09g004110-mRNA1:exon;Parent=Mdg_09g004110-mRNA1
chr9	maker	exon	2840456	2840522	.	-	.	ID=Mdg_09g004110-mRNA1:exon;Parent=Mdg_09g004110-mRNA1
chr9	maker	CDS	2841611	2842121	.	-	0	ID=Mdg_09g004110-mRNA1:CDS;Parent=Mdg_09g004110-mRNA1
chr9	maker	CDS	2841196	2841370	.	-	2	ID=Mdg_09g004110-mRNA1:CDS;Parent=Mdg_09g004110-mRNA1
chr9	maker	CDS	2841033	2841118	.	-	1	ID=Mdg_09g004110-mRNA1:CDS;Parent=Mdg_09g004110-mRNA1
chr9	maker	CDS	2840783	2840940	.	-	2	ID=Mdg_09g004110-mRNA1:CDS;Parent=Mdg_09g004110-mRNA1
chr9	maker	CDS	2840630	2840706	.	-	0	ID=Mdg_09g004110-mRNA1:CDS;Parent=Mdg_09g004110-mRNA1
chr9	maker	CDS	2840456	2840522	.	-	1	ID=Mdg_09g004110-mRNA1:CDS;Parent=Mdg_09g004110-mRNA1
#########################################################################################################
Target genome: Pyrus betulifolia
Genes: GWHTAAYT053789 (=Pyrbe_053789, PIN8a); GWHTAAYT053788 (=Pyrbe_053788,VDAC)
Source: Genome Database for Rosaceae (GDR)
#########################################################################################################
GWHAAYT00000009	EVM	mRNA	2624511	2626520	.	-	.	ID=Chr9.g46992.m1;Accession=GWHTAAYT053789;Parent=Chr9.g46992;Parent_Accession=GWHGAAYT053789;
GWHAAYT00000009	EVM	exon	2626010	2626520	.	-	.	ID=Chr9.g46992.m1.exon1;Parent=Chr9.g46992.m1;Parent_Accession=GWHTAAYT053789;
GWHAAYT00000009	EVM	CDS	2626010	2626520	.	-	0	ID=Chr9.g46992.m1.cds;Parent=Chr9.g46992.m1;Parent_Accession=GWHTAAYT053789;Protein_Accession=GWHPAAYT053789;
GWHAAYT00000009	EVM	exon	2625576	2625750	.	-	.	ID=Chr9.g46992.m1.exon2;Parent=Chr9.g46992.m1;Parent_Accession=GWHTAAYT053789;
GWHAAYT00000009	EVM	CDS	2625576	2625750	.	-	2	ID=Chr9.g46992.m1.cds;Parent=Chr9.g46992.m1;Parent_Accession=GWHTAAYT053789;Protein_Accession=GWHPAAYT053789;
GWHAAYT00000009	EVM	exon	2625413	2625498	.	-	.	ID=Chr9.g46992.m1.exon3;Parent=Chr9.g46992.m1;Parent_Accession=GWHTAAYT053789;
GWHAAYT00000009	EVM	CDS	2625413	2625498	.	-	1	ID=Chr9.g46992.m1.cds;Parent=Chr9.g46992.m1;Parent_Accession=GWHTAAYT053789;Protein_Accession=GWHPAAYT053789;
GWHAAYT00000009	EVM	exon	2625163	2625320	.	-	.	ID=Chr9.g46992.m1.exon4;Parent=Chr9.g46992.m1;Parent_Accession=GWHTAAYT053789;
GWHAAYT00000009	EVM	CDS	2625163	2625320	.	-	2	ID=Chr9.g46992.m1.cds;Parent=Chr9.g46992.m1;Parent_Accession=GWHTAAYT053789;Protein_Accession=GWHPAAYT053789;
GWHAAYT00000009	EVM	exon	2625010	2625086	.	-	.	ID=Chr9.g46992.m1.exon5;Parent=Chr9.g46992.m1;Parent_Accession=GWHTAAYT053789;
GWHAAYT00000009	EVM	CDS	2625010	2625086	.	-	0	ID=Chr9.g46992.m1.cds;Parent=Chr9.g46992.m1;Parent_Accession=GWHTAAYT053789;Protein_Accession=GWHPAAYT053789;
GWHAAYT00000009	EVM	exon	2624511	2624902	.	-	.	ID=Chr9.g46992.m1.exon6;Parent=Chr9.g46992.m1;Parent_Accession=GWHTAAYT053789;
GWHAAYT00000009	EVM	CDS	2624836	2624902	.	-	1	ID=Chr9.g46992.m1.cds;Parent=Chr9.g46992.m1;Parent_Accession=GWHTAAYT053789;Protein_Accession=GWHPAAYT053789;
GWHAAYT00000009	EVM	three_prime_UTR	2624511	2624835	.	-	.	ID=Chr9.g46992.m1.utr3p1;Parent=Chr9.g46992.m1;Parent_Accession=GWHTAAYT053789;
GWHAAYT00000009	EVM	gene	2619198	2621803	.	-	.	ID=Chr9.g46993;Accession=GWHGAAYT053788;
GWHAAYT00000009	EVM	mRNA	2619198	2621803	.	-	.	ID=Chr9.g46993.m1;Accession=GWHTAAYT053788;Parent=Chr9.g46993;Parent_Accession=GWHGAAYT053788;
GWHAAYT00000009	EVM	five_prime_UTR	2621655	2621803	.	-	.	ID=Chr9.g46993.m1.utr5p1;Parent=Chr9.g46993.m1;Parent_Accession=GWHTAAYT053788;
GWHAAYT00000009	EVM	exon	2621609	2621803	.	-	.	ID=Chr9.g46993.m1.exon1;Parent=Chr9.g46993.m1;Parent_Accession=GWHTAAYT053788;
GWHAAYT00000009	EVM	CDS	2621609	2621654	.	-	0	ID=Chr9.g46993.m1.cds;Parent=Chr9.g46993.m1;Parent_Accession=GWHTAAYT053788;Protein_Accession=GWHPAAYT053788;
GWHAAYT00000009	EVM	exon	2621409	2621476	.	-	.	ID=Chr9.g46993.m1.exon2;Parent=Chr9.g46993.m1;Parent_Accession=GWHTAAYT053788;
GWHAAYT00000009	EVM	CDS	2621409	2621476	.	-	2	ID=Chr9.g46993.m1.cds;Parent=Chr9.g46993.m1;Parent_Accession=GWHTAAYT053788;Protein_Accession=GWHPAAYT053788;
GWHAAYT00000009	EVM	exon	2620685	2620795	.	-	.	ID=Chr9.g46993.m1.exon3;Parent=Chr9.g46993.m1;Parent_Accession=GWHTAAYT053788;
GWHAAYT00000009	EVM	CDS	2620685	2620795	.	-	0	ID=Chr9.g46993.m1.cds;Parent=Chr9.g46993.m1;Parent_Accession=GWHTAAYT053788;Protein_Accession=GWHPAAYT053788;
GWHAAYT00000009	EVM	exon	2620329	2620415	.	-	.	ID=Chr9.g46993.m1.exon4;Parent=Chr9.g46993.m1;Parent_Accession=GWHTAAYT053788;
GWHAAYT00000009	EVM	CDS	2620329	2620415	.	-	0	ID=Chr9.g46993.m1.cds;Parent=Chr9.g46993.m1;Parent_Accession=GWHTAAYT053788;Protein_Accession=GWHPAAYT053788;
GWHAAYT00000009	EVM	exon	2619961	2620169	.	-	.	ID=Chr9.g46993.m1.exon5;Parent=Chr9.g46993.m1;Parent_Accession=GWHTAAYT053788;
GWHAAYT00000009	EVM	CDS	2619961	2620169	.	-	0	ID=Chr9.g46993.m1.cds;Parent=Chr9.g46993.m1;Parent_Accession=GWHTAAYT053788;Protein_Accession=GWHPAAYT053788;
GWHAAYT00000009	EVM	exon	2619198	2619845	.	-	.	ID=Chr9.g46993.m1.exon6;Parent=Chr9.g46993.m1;Parent_Accession=GWHTAAYT053788;
GWHAAYT00000009	EVM	CDS	2619539	2619845	.	-	1	ID=Chr9.g46993.m1.cds;Parent=Chr9.g46993.m1;Parent_Accession=GWHTAAYT053788;Protein_Accession=GWHPAAYT053788;
GWHAAYT00000009	EVM	three_prime_UTR	2619198	2619538	.	-	.	ID=Chr9.g46993.m1.utr3p1;Parent=Chr9.g46993.m1;Parent_Accession=GWHTAAYT053788;
#########################################################################################################
Target Genome: Pyrus pyrifolia Nijisseiki
Genes:Ppy09g0380.1 (=Pyrpy_N_09g0380.1, VDAC); Ppy09g0381.1 (=Pyrpy_N_09g0381.1, PIN8a)
Source: Genome Database for Rosaceae (GDR)
#########################################################################################################
PPY_r1.0chr09	maker	gene	2495009	2497419	.	-	.	ID=Ppy09g0380.1;Note=Mitochondrial outer membrane protein porin of 34 kDa
PPY_r1.0chr09	maker	exon	2497380	2497419	.	-	.	ID=Ppy09g0380.1:exon:7;Parent=Ppy09g0380.1
PPY_r1.0chr09	maker	exon	2497086	2497268	.	-	.	ID=Ppy09g0380.1:exon:6;Parent=Ppy09g0380.1
PPY_r1.0chr09	maker	exon	2496886	2496953	.	-	.	ID=Ppy09g0380.1:exon:5;Parent=Ppy09g0380.1
PPY_r1.0chr09	maker	exon	2496154	2496264	.	-	.	ID=Ppy09g0380.1:exon:4;Parent=Ppy09g0380.1
PPY_r1.0chr09	maker	exon	2495798	2495884	.	-	.	ID=Ppy09g0380.1:exon:3;Parent=Ppy09g0380.1
PPY_r1.0chr09	maker	exon	2495430	2495638	.	-	.	ID=Ppy09g0380.1:exon:2;Parent=Ppy09g0380.1
PPY_r1.0chr09	maker	exon	2495009	2495315	.	-	.	ID=Ppy09g0380.1:exon:1;Parent=Ppy09g0380.1
PPY_r1.0chr09	maker	CDS	2497380	2497419	.	-	0	ID=Ppy09g0380.1:CDS:7;Parent=Ppy09g0380.1
PPY_r1.0chr09	maker	CDS	2497086	2497268	.	-	2	ID=Ppy09g0380.1:CDS:6;Parent=Ppy09g0380.1
PPY_r1.0chr09	maker	CDS	2496886	2496953	.	-	2	ID=Ppy09g0380.1:CDS:5;Parent=Ppy09g0380.1
PPY_r1.0chr09	maker	CDS	2496154	2496264	.	-	0	ID=Ppy09g0380.1:CDS:4;Parent=Ppy09g0380.1
PPY_r1.0chr09	maker	CDS	2495798	2495884	.	-	0	ID=Ppy09g0380.1:CDS:3;Parent=Ppy09g0380.1
PPY_r1.0chr09	maker	CDS	2495430	2495638	.	-	0	ID=Ppy09g0380.1:CDS:2;Parent=Ppy09g0380.1
PPY_r1.0chr09	maker	CDS	2495009	2495315	.	-	1	ID=Ppy09g0380.1:CDS:1;Parent=Ppy09g0380.1
PPY_r1.0chr09	maker	gene	2500327	2502012	.	-	.	ID=Ppy09g0381.1;Note=Auxin efflux carrier component 8
PPY_r1.0chr09	maker	exon	2501502	2502012	.	-	.	ID=Ppy09g0381.1:exon:6;Parent=Ppy09g0381.1
PPY_r1.0chr09	maker	exon	2501067	2501241	.	-	.	ID=Ppy09g0381.1:exon:5;Parent=Ppy09g0381.1
PPY_r1.0chr09	maker	exon	2500904	2500989	.	-	.	ID=Ppy09g0381.1:exon:4;Parent=Ppy09g0381.1
PPY_r1.0chr09	maker	exon	2500654	2500811	.	-	.	ID=Ppy09g0381.1:exon:3;Parent=Ppy09g0381.1
PPY_r1.0chr09	maker	exon	2500501	2500577	.	-	.	ID=Ppy09g0381.1:exon:2;Parent=Ppy09g0381.1
PPY_r1.0chr09	maker	exon	2500327	2500393	.	-	.	ID=Ppy09g0381.1:exon:1;Parent=Ppy09g0381.1
PPY_r1.0chr09	maker	CDS	2501502	2502012	.	-	0	ID=Ppy09g0381.1:CDS:6;Parent=Ppy09g0381.1
PPY_r1.0chr09	maker	CDS	2501067	2501241	.	-	2	ID=Ppy09g0381.1:CDS:5;Parent=Ppy09g0381.1
PPY_r1.0chr09	maker	CDS	2500904	2500989	.	-	1	ID=Ppy09g0381.1:CDS:4;Parent=Ppy09g0381.1
PPY_r1.0chr09	maker	CDS	2500654	2500811	.	-	2	ID=Ppy09g0381.1:CDS:3;Parent=Ppy09g0381.1
PPY_r1.0chr09	maker	CDS	2500501	2500577	.	-	0	ID=Ppy09g0381.1:CDS:2;Parent=Ppy09g0381.1
PPY_r1.0chr09	maker	CDS	2500327	2500393	.	-	1	ID=Ppy09g0381.1:CDS:1;Parent=Ppy09g0381.1
#########################################################################################################
Target Genome: Prunus persica
Genes: Prupe.3G271700 (=Prupe_v2.1_3G271700.1, PIN8a); Prupe.3G271800 (=Prupe_v2.1_3G271800.1, VDAC)
Source: Genome Database for Rosaceae (GDR)
#########################################################################################################
Pp03	JGI_gene	gene	25236493	25238960	.	+	.	ID=Prupe.3G271700_v2.0.a1;Name=Prupe.3G271700;ancestorIdentifier=ppa021573m.g.v1.0
Pp03	JGI_gene	mRNA	25236493	25238960	.	+	.	ID=Prupe.3G271700.1_v2.0.a1;Name=Prupe.3G271700.1;longest=1;ancestorIdentifier=ppa021573m.v1.0;Parent=Prupe.3G271700_v2.0.a1
Pp03	JGI_gene	five_prime_UTR	25236493	25236695	.	+	.	ID=Prupe.3G271700.1_v2.0.a1.five_prime_UTR.1;Parent=Prupe.3G271700.1_v2.0.a1
Pp03	JGI_gene	CDS	25236696	25237206	.	+	0	ID=Prupe.3G271700.1_v2.0.a1.CDS.1;Parent=Prupe.3G271700.1_v2.0.a1
Pp03	JGI_gene	CDS	25237665	25237839	.	+	2	ID=Prupe.3G271700.1_v2.0.a1.CDS.2;Parent=Prupe.3G271700.1_v2.0.a1
Pp03	JGI_gene	CDS	25237966	25238051	.	+	1	ID=Prupe.3G271700.1_v2.0.a1.CDS.3;Parent=Prupe.3G271700.1_v2.0.a1
Pp03	JGI_gene	CDS	25238139	25238296	.	+	2	ID=Prupe.3G271700.1_v2.0.a1.CDS.4;Parent=Prupe.3G271700.1_v2.0.a1
Pp03	JGI_gene	CDS	25238394	25238470	.	+	0	ID=Prupe.3G271700.1_v2.0.a1.CDS.5;Parent=Prupe.3G271700.1_v2.0.a1
Pp03	JGI_gene	CDS	25238561	25238627	.	+	1	ID=Prupe.3G271700.1_v2.0.a1.CDS.6;Parent=Prupe.3G271700.1_v2.0.a1
Pp03	JGI_gene	three_prime_UTR	25238628	25238960	.	+	.	ID=Prupe.3G271700.1_v2.0.a1.three_prime_UTR.1;Parent=Prupe.3G271700.1_v2.0.a1
Pp03	JGI_gene	gene	25239322	25242183	.	+	.	ID=Prupe.3G271800_v2.0.a1;Name=Prupe.3G271800;ancestorIdentifier=ppa008585m.g.v1.0
Pp03	JGI_gene	mRNA	25239322	25242183	.	+	.	ID=Prupe.3G271800.1_v2.0.a1;Name=Prupe.3G271800.1;longest=1;Parent=Prupe.3G271800_v2.0.a1
Pp03	JGI_gene	five_prime_UTR	25239322	25239489	.	+	.	ID=Prupe.3G271800.1_v2.0.a1.five_prime_UTR.1;Parent=Prupe.3G271800.1_v2.0.a1
Pp03	JGI_gene	CDS	25239490	25239535	.	+	0	ID=Prupe.3G271800.1_v2.0.a1.CDS.1;Parent=Prupe.3G271800.1_v2.0.a1
Pp03	JGI_gene	CDS	25239651	25239718	.	+	2	ID=Prupe.3G271800.1_v2.0.a1.CDS.2;Parent=Prupe.3G271800.1_v2.0.a1
Pp03	JGI_gene	CDS	25240358	25240468	.	+	0	ID=Prupe.3G271800.1_v2.0.a1.CDS.3;Parent=Prupe.3G271800.1_v2.0.a1
Pp03	JGI_gene	CDS	25240787	25240873	.	+	0	ID=Prupe.3G271800.1_v2.0.a1.CDS.4;Parent=Prupe.3G271800.1_v2.0.a1
Pp03	JGI_gene	CDS	25241052	25241260	.	+	0	ID=Prupe.3G271800.1_v2.0.a1.CDS.5;Parent=Prupe.3G271800.1_v2.0.a1
Pp03	JGI_gene	CDS	25241484	25241790	.	+	1	ID=Prupe.3G271800.1_v2.0.a1.CDS.6;Parent=Prupe.3G271800.1_v2.0.a1
Pp03	JGI_gene	three_prime_UTR	25241791	25242183	.	+	.	ID=Prupe.3G271800.1_v2.0.a1.three_prime_UTR.1;Parent=Prupe.3G271800.1_v2.0.a1
Pp03	JGI_gene	gene	25242675	25244843	.	-	.
#########################################################################################################
Target Genome: Fragaria vesca assembly version 4 annoation version 2
Genes: FvH4_6g49240 (=FraveV4A2_6g49240.t1, PIN8a); FvH4_6g49250 (=FraveV4A2_6g49250.t1, VDAC)
Source: Genome Database for Rosaceae (GDR)
#########################################################################################################
Fvb6	phytozomev13	gene	36945104	36947427	.	+	.	ID=FvH4_6g49240.v4.0.a2;Name=FvH4_6g49240
Fvb6	phytozomev13	mRNA	36945104	36947427	.	+	.	ID=FvH4_6g49240.t1.v4.0.a2;Name=FvH4_6g49240.t1;pacid=50647294;longest=1;Parent=FvH4_6g49240.v4.0.a2
Fvb6	phytozomev13	five_prime_UTR	36945104	36945229	.	+	.	ID=FvH4_6g49240.t1.v4.0.a2.five_prime_UTR.1;Parent=FvH4_6g49240.t1.v4.0.a2;pacid=50647294
Fvb6	phytozomev13	CDS	36945230	36945740	.	+	0	ID=FvH4_6g49240.t1.v4.0.a2.CDS.1;Parent=FvH4_6g49240.t1.v4.0.a2;pacid=50647294
Fvb6	phytozomev13	CDS	36946075	36946249	.	+	2	ID=FvH4_6g49240.t1.v4.0.a2.CDS.2;Parent=FvH4_6g49240.t1.v4.0.a2;pacid=50647294
Fvb6	phytozomev13	CDS	36946337	36946422	.	+	1	ID=FvH4_6g49240.t1.v4.0.a2.CDS.3;Parent=FvH4_6g49240.t1.v4.0.a2;pacid=50647294
Fvb6	phytozomev13	CDS	36946520	36946677	.	+	2	ID=FvH4_6g49240.t1.v4.0.a2.CDS.4;Parent=FvH4_6g49240.t1.v4.0.a2;pacid=50647294
Fvb6	phytozomev13	CDS	36946781	36946857	.	+	0	ID=FvH4_6g49240.t1.v4.0.a2.CDS.5;Parent=FvH4_6g49240.t1.v4.0.a2;pacid=50647294
Fvb6	phytozomev13	CDS	36946978	36947044	.	+	1	ID=FvH4_6g49240.t1.v4.0.a2.CDS.6;Parent=FvH4_6g49240.t1.v4.0.a2;pacid=50647294
Fvb6	phytozomev13	three_prime_UTR	36947045	36947427	.	+	.	ID=FvH4_6g49240.t1.v4.0.a2.three_prime_UTR.1;Parent=FvH4_6g49240.t1.v4.0.a2;pacid=50647294
Fvb6	phytozomev13	gene	36948698	36951134	.	+	.	ID=FvH4_6g49250.v4.0.a2;Name=FvH4_6g49250
Fvb6	phytozomev13	mRNA	36948698	36951134	.	+	.	ID=FvH4_6g49250.t1.v4.0.a2;Name=FvH4_6g49250.t1;pacid=50645576;longest=1;Parent=FvH4_6g49250.v4.0.a2
Fvb6	phytozomev13	five_prime_UTR	36948698	36948799	.	+	.	ID=FvH4_6g49250.t1.v4.0.a2.five_prime_UTR.1;Parent=FvH4_6g49250.t1.v4.0.a2;pacid=50645576
Fvb6	phytozomev13	CDS	36948800	36948848	.	+	0	ID=FvH4_6g49250.t1.v4.0.a2.CDS.1;Parent=FvH4_6g49250.t1.v4.0.a2;pacid=50645576
Fvb6	phytozomev13	CDS	36948961	36949028	.	+	2	ID=FvH4_6g49250.t1.v4.0.a2.CDS.2;Parent=FvH4_6g49250.t1.v4.0.a2;pacid=50645576
Fvb6	phytozomev13	CDS	36949523	36949633	.	+	0	ID=FvH4_6g49250.t1.v4.0.a2.CDS.3;Parent=FvH4_6g49250.t1.v4.0.a2;pacid=50645576
Fvb6	phytozomev13	CDS	36949872	36949958	.	+	0	ID=FvH4_6g49250.t1.v4.0.a2.CDS.4;Parent=FvH4_6g49250.t1.v4.0.a2;pacid=50645576
Fvb6	phytozomev13	CDS	36950084	36950292	.	+	0	ID=FvH4_6g49250.t1.v4.0.a2.CDS.5;Parent=FvH4_6g49250.t1.v4.0.a2;pacid=50645576
Fvb6	phytozomev13	CDS	36950468	36950774	.	+	1	ID=FvH4_6g49250.t1.v4.0.a2.CDS.6;Parent=FvH4_6g49250.t1.v4.0.a2;pacid=50645576
Fvb6	phytozomev13	three_prime_UTR	36950775	36951134	.	+	.	ID=FvH4_6g49250.t1.v4.0.a2.three_prime_UTR.1;Parent=FvH4_6g49250.t1.v4.0.a2;pacid=50645576
#########################################################################################################
Target Genome: Rosa chinensis v2.0
Genes: RcHm_v2.0_Chr2g0169101 (=Rosch_v2.0_Chr2g0169101, PIN8a); RcHm_v2.0_Chr2g0169111 (=Rosch_v2.0_Chr2g0169111, VDAC)
Source: Genome Database for Rosaceae (GDR)
#########################################################################################################
RcHm_v2.0_Chr2	EuGene	gene	83381399	83383507	.	+	.	ID=gene:RcHm_v2.0_Chr2g0169101;Name=RcHm_v2.0_Chr2g0169101;locus_tag=RcHm_v2.0_Chr2g0169101
RcHm_v2.0_Chr2	EuGene	mRNA	83381399	83383507	.	+	.	ID=mRNA:RcHm_v2.0_Chr2g0169101;Name=RcHm_v2.0_Chr2g0169101;Parent=gene:RcHm_v2.0_Chr2g0169101;locus_tag=RcHm_v2.0_Chr2g0169101
RcHm_v2.0_Chr2	EuGene	exon	83381399	83381955	.	+	.	ID=exon:RcHm_v2.0_Chr2g0169101.1;Parent=mRNA:RcHm_v2.0_Chr2g0169101
RcHm_v2.0_Chr2	EuGene	exon	83382314	83382488	.	+	2	ID=exon:RcHm_v2.0_Chr2g0169101.2;Parent=mRNA:RcHm_v2.0_Chr2g0169101
RcHm_v2.0_Chr2	EuGene	exon	83382576	83382661	.	+	1	ID=exon:RcHm_v2.0_Chr2g0169101.3;Parent=mRNA:RcHm_v2.0_Chr2g0169101
RcHm_v2.0_Chr2	EuGene	exon	83382763	83382920	.	+	2	ID=exon:RcHm_v2.0_Chr2g0169101.4;Parent=mRNA:RcHm_v2.0_Chr2g0169101
RcHm_v2.0_Chr2	EuGene	exon	83383027	83383103	.	+	0	ID=exon:RcHm_v2.0_Chr2g0169101.5;Parent=mRNA:RcHm_v2.0_Chr2g0169101
RcHm_v2.0_Chr2	EuGene	exon	83383240	83383507	.	+	1	ID=exon:RcHm_v2.0_Chr2g0169101.6;Parent=mRNA:RcHm_v2.0_Chr2g0169101
RcHm_v2.0_Chr2	EuGene	five_prime_UTR	83381399	83381444	.	+	.	ID=five_prime_UTR:RcHm_v2.0_Chr2g0169101.0;Parent=mRNA:RcHm_v2.0_Chr2g0169101;est_cons=100.0;est_incons=0.0
RcHm_v2.0_Chr2	EuGene	CDS	83381445	83381955	.	+	0	ID=CDS:RcHm_v2.0_Chr2g0169101.1;Parent=mRNA:RcHm_v2.0_Chr2g0169101;est_cons=100.0;est_incons=0.0
RcHm_v2.0_Chr2	EuGene	CDS	83382314	83382488	.	+	2	ID=CDS:RcHm_v2.0_Chr2g0169101.2;Parent=mRNA:RcHm_v2.0_Chr2g0169101;est_cons=100.0;est_incons=0.0
RcHm_v2.0_Chr2	EuGene	CDS	83382576	83382661	.	+	1	ID=CDS:RcHm_v2.0_Chr2g0169101.3;Parent=mRNA:RcHm_v2.0_Chr2g0169101;est_cons=100.0;est_incons=0.0
RcHm_v2.0_Chr2	EuGene	CDS	83382763	83382920	.	+	2	ID=CDS:RcHm_v2.0_Chr2g0169101.4;Parent=mRNA:RcHm_v2.0_Chr2g0169101;est_cons=100.0;est_incons=0.0
RcHm_v2.0_Chr2	EuGene	CDS	83383027	83383103	.	+	0	ID=CDS:RcHm_v2.0_Chr2g0169101.5;Parent=mRNA:RcHm_v2.0_Chr2g0169101;est_cons=100.0;est_incons=0.0
RcHm_v2.0_Chr2	EuGene	CDS	83383240	83383306	.	+	1	ID=CDS:RcHm_v2.0_Chr2g0169101.6;Parent=mRNA:RcHm_v2.0_Chr2g0169101;est_cons=100.0;est_incons=0.0
RcHm_v2.0_Chr2	EuGene	three_prime_UTR	83383307	83383507	.	+	.	ID=three_prime_UTR:RcHm_v2.0_Chr2g0169101.12;Parent=mRNA:RcHm_v2.0_Chr2g0169101;est_cons=100.0;est_incons=0.0
###
RcHm_v2.0_Chr2	EuGene	gene	83384903	83387616	.	+	.	ID=gene:RcHm_v2.0_Chr2g0169111;Name=RcHm_v2.0_Chr2g0169111;locus_tag=RcHm_v2.0_Chr2g0169111
RcHm_v2.0_Chr2	EuGene	mRNA	83384903	83387616	.	+	.	ID=mRNA:RcHm_v2.0_Chr2g0169111;Name=RcHm_v2.0_Chr2g0169111;Parent=gene:RcHm_v2.0_Chr2g0169111;locus_tag=RcHm_v2.0_Chr2g0169111
RcHm_v2.0_Chr2	EuGene	exon	83384903	83385040	.	+	.	ID=exon:RcHm_v2.0_Chr2g0169111.1;Parent=mRNA:RcHm_v2.0_Chr2g0169111
RcHm_v2.0_Chr2	EuGene	exon	83385154	83385221	.	+	2	ID=exon:RcHm_v2.0_Chr2g0169111.2;Parent=mRNA:RcHm_v2.0_Chr2g0169111
RcHm_v2.0_Chr2	EuGene	exon	83385690	83385800	.	+	0	ID=exon:RcHm_v2.0_Chr2g0169111.3;Parent=mRNA:RcHm_v2.0_Chr2g0169111
RcHm_v2.0_Chr2	EuGene	exon	83386023	83386109	.	+	0	ID=exon:RcHm_v2.0_Chr2g0169111.4;Parent=mRNA:RcHm_v2.0_Chr2g0169111
RcHm_v2.0_Chr2	EuGene	exon	83386259	83386467	.	+	0	ID=exon:RcHm_v2.0_Chr2g0169111.5;Parent=mRNA:RcHm_v2.0_Chr2g0169111
RcHm_v2.0_Chr2	EuGene	exon	83386703	83387616	.	+	1	ID=exon:RcHm_v2.0_Chr2g0169111.6;Parent=mRNA:RcHm_v2.0_Chr2g0169111
RcHm_v2.0_Chr2	EuGene	five_prime_UTR	83384903	83384991	.	+	.	ID=five_prime_UTR:RcHm_v2.0_Chr2g0169111.0;Parent=mRNA:RcHm_v2.0_Chr2g0169111;est_cons=100.0;est_incons=0.0
RcHm_v2.0_Chr2	EuGene	CDS	83384992	83385040	.	+	0	ID=CDS:RcHm_v2.0_Chr2g0169111.1;Parent=mRNA:RcHm_v2.0_Chr2g0169111;est_cons=100.0;est_incons=0.0
RcHm_v2.0_Chr2	EuGene	CDS	83385154	83385221	.	+	2	ID=CDS:RcHm_v2.0_Chr2g0169111.2;Parent=mRNA:RcHm_v2.0_Chr2g0169111;est_cons=100.0;est_incons=0.0
RcHm_v2.0_Chr2	EuGene	CDS	83385690	83385800	.	+	0	ID=CDS:RcHm_v2.0_Chr2g0169111.3;Parent=mRNA:RcHm_v2.0_Chr2g0169111;est_cons=100.0;est_incons=0.0
RcHm_v2.0_Chr2	EuGene	CDS	83386023	83386109	.	+	0	ID=CDS:RcHm_v2.0_Chr2g0169111.4;Parent=mRNA:RcHm_v2.0_Chr2g0169111;est_cons=100.0;est_incons=0.0
RcHm_v2.0_Chr2	EuGene	CDS	83386259	83386467	.	+	0	ID=CDS:RcHm_v2.0_Chr2g0169111.5;Parent=mRNA:RcHm_v2.0_Chr2g0169111;est_cons=100.0;est_incons=0.0
RcHm_v2.0_Chr2	EuGene	CDS	83386703	83387009	.	+	1	ID=CDS:RcHm_v2.0_Chr2g0169111.6;Parent=mRNA:RcHm_v2.0_Chr2g0169111;est_cons=100.0;est_incons=0.0
RcHm_v2.0_Chr2	EuGene	three_prime_UTR	83387010	83387616	.	+	.	ID=three_prime_UTR:RcHm_v2.0_Chr2g0169111.12;Parent=mRNA:RcHm_v2.0_Chr2g0169111;est_cons=100.0;est_incons=0.0
#########################################################################################################
Target Genome: Rubus occidentalis v3
Genes: Ro06_G16336 (=Ruboc_06_G16336, PIN8a), Ro06_G16337 (=Ruboc_06_G16337, VDAC)
Source: Genome Database for Rosaceae (GDR)
#########################################################################################################
Ro06	maker	gene	268529	271065	.	+	.	ID=maker-Ro06-snap-gene-2.84;Name=maker-Ro06-snap-gene-2.84
Ro06	maker	mRNA	268529	271065	.	+	.	ID=Ro06_G16336;Parent=maker-Ro06-snap-gene-2.84;Name=Ro06_G16336;Alias=maker-Ro06-snap-gene-2.84-mRNA-1;_AED=0.04;_QI=91|1|1|1|1|1|5|531|394;_eAED=0.04;
Ro06	maker	exon	268529	269130	.	+	.	ID=Ro06_G16336:exon:50;Parent=Ro06_G16336;
Ro06	maker	exon	269497	269677	.	+	.	ID=Ro06_G16336:exon:51;Parent=Ro06_G16336;
Ro06	maker	exon	269765	270113	.	+	.	ID=Ro06_G16336:exon:52;Parent=Ro06_G16336;
Ro06	maker	exon	270218	270294	.	+	.	ID=Ro06_G16336:exon:53;Parent=Ro06_G16336;
Ro06	maker	exon	270468	271065	.	+	.	ID=Ro06_G16336:exon:54;Parent=Ro06_G16336;
Ro06	maker	five_prime_UTR	268529	268619	.	+	.	ID=Ro06_G16336:five_prime_utr;Parent=Ro06_G16336;
Ro06	maker	CDS	268620	269130	.	+	0	ID=Ro06_G16336:cds;Parent=Ro06_G16336;
Ro06	maker	CDS	269497	269677	.	+	2	ID=Ro06_G16336:cds;Parent=Ro06_G16336;
Ro06	maker	CDS	269765	270113	.	+	1	ID=Ro06_G16336:cds;Parent=Ro06_G16336;
Ro06	maker	CDS	270218	270294	.	+	0	ID=Ro06_G16336:cds;Parent=Ro06_G16336;
Ro06	maker	CDS	270468	270534	.	+	1	ID=Ro06_G16336:cds;Parent=Ro06_G16336;
Ro06	maker	three_prime_UTR	270535	271065	.	+	.	ID=Ro06_G16336:three_prime_utr;Parent=Ro06_G16336;
Ro06	maker	gene	271567	273877	.	+	.	ID=maker-Ro06-snap-gene-2.85;Name=maker-Ro06-snap-gene-2.85
Ro06	maker	mRNA	271567	273877	.	+	.	ID=Ro06_G16337;Parent=maker-Ro06-snap-gene-2.85;Name=Ro06_G16337;Alias=maker-Ro06-snap-gene-2.85-mRNA-1;_AED=0.25;_QI=167|1|1|1|1|1|6|202|276;_eAED=0.25;
Ro06	maker	exon	271567	271782	.	+	.	ID=Ro06_G16337:exon:101;Parent=Ro06_G16337;
Ro06	maker	exon	271878	271945	.	+	.	ID=Ro06_G16337:exon:102;Parent=Ro06_G16337;
Ro06	maker	exon	272392	272502	.	+	.	ID=Ro06_G16337:exon:103;Parent=Ro06_G16337;
Ro06	maker	exon	272752	272838	.	+	.	ID=Ro06_G16337:exon:104;Parent=Ro06_G16337;
Ro06	maker	exon	272980	273188	.	+	.	ID=Ro06_G16337:exon:105;Parent=Ro06_G16337;
Ro06	maker	exon	273369	273877	.	+	.	ID=Ro06_G16337:exon:106;Parent=Ro06_G16337;
Ro06	maker	five_prime_UTR	271567	271733	.	+	.	ID=Ro06_G16337:five_prime_utr;Parent=Ro06_G16337;
Ro06	maker	CDS	271734	271782	.	+	0	ID=Ro06_G16337:cds;Parent=Ro06_G16337;
Ro06	maker	CDS	271878	271945	.	+	2	ID=Ro06_G16337:cds;Parent=Ro06_G16337;
Ro06	maker	CDS	272392	272502	.	+	0	ID=Ro06_G16337:cds;Parent=Ro06_G16337;
Ro06	maker	CDS	272752	272838	.	+	0	ID=Ro06_G16337:cds;Parent=Ro06_G16337;
Ro06	maker	CDS	272980	273188	.	+	0	ID=Ro06_G16337:cds;Parent=Ro06_G16337;
Ro06	maker	CDS	273369	273675	.	+	1	ID=Ro06_G16337:cds;Parent=Ro06_G16337;
Ro06	maker	three_prime_UTR	273676	273877	.	+	.	ID=Ro06_G16337:three_prime_utr;Parent=Ro06_G16337;

## Sheet: SupTable6.BUSCO vs %CROG
Supplemental Table 6: %CROG, annotation BUSCO completeness across Rosaceae genomes and their correlation.
	BUSCO*	%CROG	Note
Prunus persica v2.1	0.992	0.9871
Pruns avium	0.834	0.933824
Malus domestica GDDH	0.967	0.972245
Malus domestica GD_v1	0.672	0.839892
Malus domestica HF	0.949	0.943662
Malus domestica Gala Hap	0.955	0.959818
Malus sieversii Hap	0.962	0.963857
Malus sylvestris Hap	0.962	0.960543
Malus_baccata	0.885	0.969967
Pyrus communis Bartlett v1.0	0.931	0.961371
Pyrus communis BartlettDH	0.818	0.939416
Pyrus communis D’Anjou	0.929	0.956089
Pyrus_ussuriensis_x_communis	0.907	0.952361
Pyrus_pyrifolia Nijisseiki	0.967	0.985812
Pyrus_pyrifolia Cuiguan	0.959	0.973902
Pyrus_betulifolia	0.944	0.981152
Pyrus_bretschneideri_NCBI	0.862	0.928542
Fragaria_ananassa	0.98	0.994822	Since this is an octoploid genome, it ws not used in generating the gene count matrix
Fragaria vesca_v1.1	0.885	0.937345
Fragaria vesca_v2 annotationv2	0.963	0.97908
Fragaria vesca_v4 annotationv1	0.938	0.940969
Fragaria vesca_v4 annotationv2	0.987	0.987158
Rubus occidentalis v3	0.93	0.953086
Rubus_chingii	0.961	0.970278
Rosa chinensis	0.973	0.984258
Rosa_rugosa	0.947	0.963753
* BUSCO software version 5.2.2, database: embryophyta_odb10
	Below is the summary output from the Regression function implemented in the Excel Data Analysis plugin. Cells with yellow backgroud indicates the source of the values used in the main manuscript.
	Regression Statistics
	Multiple R	0.908611
	R Square	0.825574
	Adjusted R Square	0.818306
	Standard Error	0.0129452
	Observations	26
	ANOVA
		df	SS	MS	F	Significance F
	Regression	1	0.0190358	0.0190358	113.594	1.39574e-10
	Residual	24	0.00402186	0.000167577
	Total	25	0.0230577
		Coefficients	Standard Error	t Stat	P-value	Lower 95%	Upper 95%	Lower 95.0%	Upper 95.0%
	Intercept	0.586211	0.03502	16.7393	9.73369e-15	0.513933	0.658488	0.513933	0.658488
	X Variable 1	0.402296	0.0377457	10.6581	1.39574e-10	0.324392	0.480199	0.324392	0.480199

## Sheet: SupTable7.Genome_abbreviation
Supplemental Table 7: Abbreviations of genomes used in this research (Maldo and Md are interchangeable in some cases)
Abbrevation	Full name	Data source: GDR
Malba	Malus baccata
Maldo_Gala	Malus domestica Gala Haploid
Maldo_GDDH	Malus domestica GDDH13
Maldo_GDv1	Malus domestica Golden Delicious version1
Maldo_HF	Malus domestica HFTH
Malsi	Malus sieversii
Malsy	Malus sylvestris
Pyrbe	Pyrus betulifolia
Pyrco_BPDH	Pyrus communis Bartlett double haploid v2.0
Pyrco_BPv1	Pyrus communis Bartlett v1
Pyrco_DAP	Pyrus communis DAnjou
Pyrpy_C	Pyrus pyrifolia Cuiguan
Pyrpy_N	Pyrus pyrifolia Nijisseiki
PyrUsCo	Pyrus ussuriensis x communis
Pyrbr	Pyrus bretschneideri
Prupe	Prunus persica v2.1
Frave_v1.1	Fragaria vesca v1.1
Frave_v2.2	Fragaria vesca v2.2
Frave_v4.1	Fragaria vesca v4.1
Frave_v4.2	Fragaria vesca v4.2
Pruav	Prunus avium
Rosch	Rosa chinensis homozygous v2.0.a1
Rosru	Rosa rugosa
Rubch	Rubus chingii Hu
Ruboc	Rubus occidentalis v3

## Sheet: SupTable8.CROG_annotation
Supplemental Table 8: Core Orthogroups - Rosaceae and their orthogroup metadata from PlantTribes2 26Gv2.0 scaffold
OG_ID	Arabidopsis thaliana	Carica papaya	Theobroma cacao	Eucalyptus grandis	Phaseolus vulgaris	Medicago truncatula	Prunus persica	Manihot esculenta	Populus trichocarpa	Vitis vinifera	Solanum lycopersicum	Utricularia gibba	Mimulus guttatus	Striga asiatica	Beta vulgaris	Nelumbo nucifera	Aquilegia coerulea	Oryza sativa	Sorghum bicolor	Musa acuminata	Elaeis guineensis	Spirodella polyrhiza	Amborella trichopoda	Pinus taeda	Selaginella moellendorffii	Physcomitrella patens	SuperOrthogroup I1.2	SuperOrthogroup I1.5	SuperOrthogroup I1.8	SuperOrthogroup I2.0	SuperOrthogroup I2.5	SuperOrthogroup I3.0	SuperOrthogroup I3.5	SuperOrthogroup I4.0	SuperOrthogroup I4.5	SuperOrthogroup I5.0	AHRD Descriptions	TAIR Gene(s) Descriptions	Pfam Domains	InterProScan Descriptions	GO Molecular Functions	GO Biological Processes	GO Cellular Components
OG1	153	115	186	328	240	251	175	266	351	173	182	137	178	155	147	187	122	200	182	275	45	159	100	249	124	128	1	1	1	1	2	1	1	1	1	1	Protein kinase superfamily protein [0.260] | Kinase family protein [0.169] | Protein kinase family protein [0.063] | Protein kinase [0.052] | Leucine-rich repeat protein kinase family protein [0.048] | Kinase, putative [0.047] | Cysteine-rich receptor-like protein kinase [0.045] | Receptor-like kinase [0.031] | Protein kinase-like protein [0.028] | Leucine-rich repeat transmembrane protein kinase…	Protein kinase superfamily protein | Leucine-rich repeat transmembrane protein kinase | Leucine-rich repeat protein kinase family protein | Malectin/receptor-like protein kinase family protein | root-specific kinase 1 | STRUBBELIG-receptor family 6 | STRUBBELIG-receptor family 8 | STRUBBELIG-receptor family 5 | STRUBBELIG-receptor family 4 | protein kinase family protein / peptidoglycan-binding L…	Protein tyrosine kinase (PF07714) [0.578] | Protein kinase domain (PF00069) [0.384] | Carbohydrate-binding protein of the ER (PF12819) [0.101] | Di-glucose binding within endoplasmic reticulum (PF11721) [0.099] | Leucine rich repeat (PF13855) [0.078] | Leucine rich repeat N-terminal domain (PF08263) [0.057] | Wall-associated receptor kinase C-terminal (PF14380) [0.021] | Leucine Rich Repeat (PF00…	Serine-threonine/tyrosine-protein kinase, catalytic domain (IPR001245) [0.578] | Protein kinase domain (IPR000719) [0.384] | Malectin-like carbohydrate-binding domain (IPR024788) [0.101] | Malectin (IPR021720) [0.099] | Leucine-rich repeat (IPR001611) [0.089] | Leucine-rich repeat-containing N-terminal, plant-type (IPR013210) [0.057] | Wall-associated receptor kinase, C-terminal (IPR032872) [0.02…	protein kinase activity (GO:0004672) [0.949] | ATP binding (GO:0005524) [0.384] | protein binding (GO:0005515) [0.090] | polysaccharide binding (GO:0030247) [0.013]	protein phosphorylation (GO:0006468) [0.949]	NULL / Representative annotation below 0.1%
OG2	24	34	180	197	218	392	199	140	243	210	207	30	302	89	103	128	112	379	214	102	189	65	80	60	2	0	1	1	3	3	3	6	11	16	27	26	Disease resistance protein [0.116] | Disease resistance protein RGA2 [0.077] | NBS-LRR type disease resistance protein [0.062] | Disease resistance family protein [0.058] | Disease resistance protein RPM1 [0.042] | NBS-LRR resistance protein [0.035] | Disease resistance protein (CC-NBS-LRR class) family [0.035] | Nbs-lrr resistance protein [0.032] | NBS-containing resistance-like protein [0.029] …	Disease resistance protein (CC-NBS-LRR class) family | NB-ARC domain-containing disease resistance protein | LRR and NB-ARC domains-containing disease resistance protein | HOPZ-ACTIVATED RESISTANCE 1 | RNI-like superfamily protein	NB-ARC domain (PF00931) [0.830] | Leucine rich repeat (PF13855) [0.074] | Late blight resistance protein R1 (PF12061) [0.004] | FNIP Repeat (PF05725) [0.003] | Leucine Rich Repeat (PF00560) [0.002] | Leucine Rich repeats (2 copies) (PF12799) [0.002] | Phloem protein 2 (PF14299) [0.002] | C2 domain (PF00168) [0.001] | TIR domain (PF01582) [0.001] | Zinc finger, ZZ type (PF00569) [0.001] | Jacalin-…	NB-ARC (IPR002182) [0.830] | Leucine-rich repeat (IPR001611) [0.075] | Late blight resistance protein R1 (IPR021929) [0.004] | FNIP (IPR008615) [0.003] | Leucine rich repeat 4 (IPR025875) [0.002] | Phloem protein 2-like (IPR025886) [0.002] | C2 domain (IPR000008) [0.001] | Zinc finger, ZZ-type (IPR000433) [0.001] | Toll/interleukin-1 receptor homology (TIR) domain (IPR000157) [0.001] | WRKY domai…	ADP binding (GO:0043531) [0.830] | protein binding (GO:0005515) [0.077] | DNA binding (GO:0003677) [0.001] | sequence-specific DNA binding (GO:0043565) [0.001] | protein kinase activity (GO:0004672) [0.001] | zinc ion binding (GO:0008270) [0.001] | transcription factor activity, sequence-specific DNA binding (GO:0003700) [0.001] | ATP binding (GO:0005524) [0.001]	protein phosphorylation (GO:0006468) [0.001] | regulation of transcription, DNA-templated (GO:0006355) [0.001] | signal transduction (GO:0007165) [0.001] | oxidation-reduction process (GO:0055114) [0.001] | cell redox homeostasis (GO:0045454) [0.001] | proteolysis (GO:0006508) [0.001] | ubiquitin-dependent protein catabolic process (GO:0006511) [0.001]	nucleus (GO:0005634) [0.001]
OG3	113	141	140	170	139	140	153	136	136	162	121	95	129	116	106	164	198	138	136	170	127	182	82	262	284	15	1	2	2	2	1	2	5	4	6	8	Pentatricopeptide repeat-containing protein [0.488] | Pentatricopeptide repeat-containing family protein [0.229] | Pentatricopeptide repeat-containing protein, putative [0.146] | Pentatricopeptide repeat (PPR) superfamily protein [0.046] | Pentatricopeptide repeat protein [0.031] | Pentatricopeptide repeat protein 78 [0.010] | Pentatricopeptide repeat protein 98 [0.006] | Tetratricopeptide repeat…	Tetratricopeptide repeat (TPR)-like superfamily protein | Pentatricopeptide repeat (PPR) superfamily protein | Pentatricopeptide repeat (PPR-like) superfamily protein | pentatricopeptide (PPR) repeat-containing protein | mitochondrial editing factor 19 | mitochondrial editing factor 22 | mitochondrial editing factor 21 | SLOW GROWTH 1	PPR repeat (PF01535) [0.971] | PPR repeat family (PF13041) [0.943] | DYW family of nucleic acid deaminases (PF14432) [0.537] | PPR repeat (PF12854) [0.132] | Pentatricopeptide repeat domain (PF13812) [0.057] | Tetratricopeptide repeat (PF13176) [0.002] | Pentacotripeptide-repeat region of PROPR (PF17177) [0.002] | Protein kinase domain (PF00069) [0.001] | Tetratricopeptide repeat (PF07721) [0.001…	Pentatricopeptide repeat (IPR002885) [0.985] | DYW domain (IPR032867) [0.537] | Tetratricopeptide repeat (IPR019734) [0.002] | Pentacotripeptide-repeat region of PROPR (IPR033443) [0.002] | Protein kinase domain (IPR000719) [0.001] | Tetratricopeptide TPR-4 (IPR011717) [0.001] | Small GTPase superfamily (IPR001806) [0.001] | Myc-type, basic helix-loop-helix (bHLH) domain (IPR011598) [0.001]	zinc ion binding (GO:0008270) [0.537] | protein binding (GO:0005515) [0.003] | ATP binding (GO:0005524) [0.001] | protein kinase activity (GO:0004672) [0.001] | catalytic activity (GO:0003824) [0.001] | RNA binding (GO:0003723) [0.001] | protein dimerization activity (GO:0046983) [0.001] | GTP binding (GO:0005525) [0.001] | identical protein binding (GO:0042802) [0.001] | GTPase activity (GO:0003…	protein phosphorylation (GO:0006468) [0.001] | proteolysis (GO:0006508) [0.001]	NULL / Representative annotation below 0.1%
OG4	138	16	43	693	137	511	196	53	275	95	64	0	3	2	13	18	2	11	11	4	7	0	33	793	13	503	110	1	8	10	14	47	75	72	133	142	Disease resistance protein (TIR-NBS-LRR class) family [0.330] | disease resistance protein (TIR-NBS-LRR class), putative [0.240] | disease resistance protein (TIR-NBS-LRR class) [0.157] | Disease resistance-like protein [0.043] | TIR-NBS-LRR class disease resistance protein [0.029] | Tir-nbs-lrr resistance protein [0.023] | Disease resistance protein (TIR-NBS class) [0.017] | Disease resistance p…	Disease resistance protein (TIR-NBS-LRR class) family | Toll-Interleukin-Resistance (TIR) domain family protein | Disease resistance protein (TIR-NBS class) | Disease resistance protein (TIR-NBS-LRR class) | disease resistance protein (TIR-NBS-LRR class), putative | Toll-Interleukin-Resistance (TIR) domain-containing protein | disease resistance protein (TIR-NBS-LRR class) family | Disease resist…	TIR domain (PF01582) [0.525] | NB-ARC domain (PF00931) [0.521] | Leucine Rich Repeat (PF07725) [0.060] | Leucine rich repeat (PF13855) [0.042] | Leucine Rich Repeat (PF00560) [0.040] | Protein kinase domain (PF00069) [0.018] | Leucine rich repeats (6 copies) (PF13306) [0.017] | Protein tyrosine kinase (PF07714) [0.014] | TIR domain (PF13676) [0.006] | Leucine Rich repeats (2 copies) (PF12799) [0.…	Toll/interleukin-1 receptor homology (TIR) domain (IPR000157) [0.530] | NB-ARC (IPR002182) [0.521] | Leucine-rich repeat (IPR001611) [0.077] | Leucine-rich repeat 3 (IPR011713) [0.060] | Protein kinase domain (IPR000719) [0.018] | Leucine rich repeat 5 (IPR026906) [0.017] | Serine-threonine/tyrosine-protein kinase, catalytic domain (IPR001245) [0.014] | Leucine rich repeat 4 (IPR025875) [0.005] |…	protein binding (GO:0005515) [0.578] | ADP binding (GO:0043531) [0.521] | protein kinase activity (GO:0004672) [0.031] | ATP binding (GO:0005524) [0.018] | zinc ion binding (GO:0008270) [0.002] | sequence-specific DNA binding (GO:0043565) [0.001] | transcription factor activity, sequence-specific DNA binding (GO:0003700) [0.001] | microtubule binding (GO:0008017) [0.001] | metal ion binding (GO:0…	signal transduction (GO:0007165) [0.530] | protein phosphorylation (GO:0006468) [0.031] | regulation of transcription, DNA-templated (GO:0006355) [0.001] | microtubule-based movement (GO:0007018) [0.001] | metal ion transport (GO:0030001) [0.001] | glycolytic process (GO:0006096) [0.001] | transport (GO:0006810) [0.001]	intracellular (GO:0005622) [0.001]
OG5	124	78	145	255	136	239	144	174	186	136	122	35	171	82	80	69	275	164	156	79	12	48	119	274	146	42	1	1	49	51	59	60	87	89	96	115	Cytochrome P450 [0.372] | Cytochrome P450, putative [0.332] | Cytochrome P450 family protein [0.131] | Cytochrome P450 family protein, expressed [0.024] | Flavonoid 3'-hydroxylase [0.014] | Cytochrome P450 750A1 [0.014] | Cytochrome P450 superfamily protein [0.012] | Cytochrome P450-dependent monooxygenase [0.010] | Flavonoid 3',5'-hydroxylase [0.009] | Cytochrome P450 71D7 [0.007] | Cytochrome P…	Cytochrome P450 superfamily protein | cytochrome P450, family 71, subfamily A, polypeptide 26 | cytochrome P450, family 71, subfamily B, polypeptide 4 | cytochrome P450, family 705, subfamily A, polypeptide 22 | cytochrome P450, family 705, subfamily A, polypeptide 23 | cytochrome P450, family 76, subfamily C, polypeptide 1 | cytochrome P450, family 705, subfamily A, polypeptide 32 | cytochrome P…	Cytochrome P450 (PF00067) [0.971]	Cytochrome P450 (IPR001128) [0.971]	iron ion binding (GO:0005506) [0.971] | oxidoreductase activity, acting on paired donors, with incorporation or reduction of molecular oxygen (GO:0016705) [0.971] | heme binding (GO:0020037) [0.971] | DNA binding (GO:0003677) [0.001]	oxidation-reduction process (GO:0055114) [0.971]	NULL / Representative annotation below 0.1%
OG6	50	59	140	451	95	215	146	168	184	119	119	47	124	71	73	124	130	186	141	124	22	48	63	285	79	33	1	1	1	126	60	10	9	6	4	4	Leucine-rich receptor-like protein kinase family protein [0.602] | Leucine-rich repeat receptor-like protein kinase family protein [0.120] | Leucine-rich repeat receptor-like protein kinase [0.080] | Receptor-like protein kinase [0.028] | Receptor protein kinase-like protein [0.018] | Leucine-rich receptor-like protein kinase [0.015] | Leucine-rich repeat protein kinase family protein [0.014] | R…	Leucine-rich receptor-like protein kinase family protein | Leucine-rich repeat protein kinase family protein | Leucine-rich repeat receptor-like protein kinase family protein | Leucine-rich repeat transmembrane protein kinase family protein | Leucine-rich repeat transmembrane protein kinase | Protein kinase family protein with leucine-rich repeat domain | PEP1 receptor 1 | HAESA-like 2 | HAESA-li…	Leucine rich repeat (PF13855) [0.747] | Protein kinase domain (PF00069) [0.743] | Leucine rich repeat N-terminal domain (PF08263) [0.703] | Leucine Rich Repeat (PF00560) [0.409] | Protein tyrosine kinase (PF07714) [0.155] | Leucine Rich repeat (PF13516) [0.086] | Leucine Rich repeats (2 copies) (PF12799) [0.043] | Leucine rich repeats (6 copies) (PF13306) [0.002]	Leucine-rich repeat (IPR001611) [0.821] | Protein kinase domain (IPR000719) [0.743] | Leucine-rich repeat-containing N-terminal, plant-type (IPR013210) [0.703] | Serine-threonine/tyrosine-protein kinase, catalytic domain (IPR001245) [0.155] | Leucine rich repeat 4 (IPR025875) [0.043] | Leucine rich repeat 5 (IPR026906) [0.002]	protein kinase activity (GO:0004672) [0.881] | protein binding (GO:0005515) [0.821] | ATP binding (GO:0005524) [0.743]	protein phosphorylation (GO:0006468) [0.881]	NULL / Representative annotation below 0.1%
OG7	115	72	95	124	145	181	97	149	166	69	135	107	107	101	63	100	74	111	124	200	82	59	59	210	39	77	18	1	7	299	235	222	491	577	563	557	Ethylene-responsive transcription factor [0.307] | Integrase-type DNA-binding superfamily protein [0.194] | Ethylene-responsive transcription factor, putative [0.154] | Ethylene responsive factor [0.025] | Ethylene-responsive element binding-factor [0.021] | Ethylene-responsive transcription factor 5 [0.016] | Ethylene-responsive transcription factor ERF003 [0.015] | Ethylene-responsive transcrip…	Integrase-type DNA-binding superfamily protein | ethylene-responsive element binding factor 13 | related to AP2 10 | ethylene-responsive element binding factor 15 | AP2 domain-containing transcription factor family protein | erf domain protein 9 | related to AP2 11 | cytokinin response factor 1 | redox responsive transcription factor 1 | DREB and EAR motif protein 3 | DREB and EAR motif protein 2…	AP2 domain (PF00847) [0.969] | Major intrinsic protein (PF00230) [0.002] | Tubulin C-terminal domain (PF03953) [0.001] | RNA recognition motif. (a.k.a. RRM, RBD, or RNP domain) (PF00076) [0.001]	AP2/ERF domain (IPR001471) [0.969] | Major intrinsic protein (IPR000425) [0.002] | Tubulin/FtsZ, 2-layer sandwich domain (IPR018316) [0.001] | RNA recognition motif domain (IPR000504) [0.001]	transcription factor activity, sequence-specific DNA binding (GO:0003700) [0.969] | transporter activity (GO:0005215) [0.002] | nucleic acid binding (GO:0003676) [0.001] | GTPase activity (GO:0003924) [0.001]	regulation of transcription, DNA-templated (GO:0006355) [0.969] | transport (GO:0006810) [0.002] | proteolysis (GO:0006508) [0.001]	membrane (GO:0016020) [0.003]
OG8	80	49	115	430	123	218	113	116	292	139	102	13	75	29	43	94	76	112	95	57	53	79	20	301	5	11	1	1	1	59	34	21	15	13	16	11	Serine/threonine-protein kinase [0.379] | Cysteine-rich receptor-like protein kinase [0.354] | G-type lectin S-receptor-like serine/threonine-protein kinase [0.025] | Cysteine-rich receptor-like protein kinase 42 [0.025] | receptor kinase 1 [0.019] | Cysteine-rich receptor-like protein kinase 10 [0.019] | Receptor-like protein kinase [0.011] | Serine/threonine protein kinase [0.011] | S-locus lec…	S-locus lectin protein kinase family protein | Protein kinase superfamily protein | Curculin-like (mannose-binding) lectin family protein | lectin protein kinase family protein | Domain of unknown function (DUF26) | cysteine-rich RLK (RECEPTOR-like protein kinase) 39 | cysteine-rich RLK (RECEPTOR-like protein kinase) 42 | cysteine-rich RLK (RECEPTOR-like protein kinase) 12 | protein serine/threon…	Protein tyrosine kinase (PF07714) [0.721] | PAN-like domain (PF08276) [0.357] | D-mannose binding lectin (PF01453) [0.357] | S-locus glycoprotein domain (PF00954) [0.345] | Salt stress response/antifungal (PF01657) [0.322] | Domain of unknown function (DUF3403) (PF11883) [0.202] | Protein kinase domain (PF00069) [0.180] | Receptor serine/threonine kinase (PF12398) [0.007] | Glycosyl hydrolases fa…	Serine-threonine/tyrosine-protein kinase, catalytic domain (IPR001245) [0.721] | PAN/Apple domain (IPR003609) [0.357] | Bulb-type lectin domain (IPR001480) [0.357] | S-locus glycoprotein domain (IPR000858) [0.345] | Gnk2-homologous domain (IPR002902) [0.322] | S-locus receptor kinase, C-terminal (IPR021820) [0.202] | Protein kinase domain (IPR000719) [0.180] | S-locus, receptor kinase (IPR022126)…	protein kinase activity (GO:0004672) [0.887] | protein serine/threonine kinase activity (GO:0004674) [0.202] | ATP binding (GO:0005524) [0.180] | polysaccharide binding (GO:0030247) [0.001] | protein binding (GO:0005515) [0.001] | carbohydrate binding (GO:0030246) [0.001]	protein phosphorylation (GO:0006468) [0.887] | recognition of pollen (GO:0048544) [0.345] | carbohydrate metabolic process (GO:0005975) [0.001]	membrane (GO:0016020) [0.001]
OG9	103	81	101	142	131	137	100	147	161	111	115	88	96	85	51	113	63	93	101	235	32	62	51	240	26	38	3	14	24	18	621	265	252	297	275	463	MYB transcription factor [0.246] | Myb family transcription factor family protein [0.062] | Myb-like transcription factor [0.046] | Myb transcription factor [0.042] | Myb-related transcription factor [0.042] | Myb transcription factor-like protein [0.033] | R2r3-myb transcription factor, putative [0.028] | MYB transcription factor R2R3-like protein [0.028] | Myb-related protein [0.022] | myb doma…	Duplicated homeodomain-like superfamily protein | myb-like HTH transcriptional regulator family protein | myb domain protein 103 | myb domain protein 86 | myb domain protein 40 | myb domain protein 34 | myb domain protein 16 | myb domain protein 83 | myb domain protein 87 | myb domain protein 68 | myb domain protein 79 | myb domain protein 41 | myb domain protein 107 | myb domain protein 113 | pr…	Myb-like DNA-binding domain (PF00249) [0.963] | Myb-like DNA-binding domain (PF13921) [0.017] | P protein C-terminus (PF06640) [0.001]	SANT/Myb domain (IPR001005) [0.963] | Myb-related protein P, C-terminal (IPR010588) [0.001]	NULL / Representative annotation below 0.1%	NULL / Representative annotation below 0.1%	NULL / Representative annotation below 0.1%
OG10	108	69	106	93	126	158	98	123	136	37	106	63	125	72	62	83	106	136	139	94	104	51	75	172	51	24	1	2	2	614	362	30	68	99	122	143	RING/U-box superfamily protein [0.781] | Ring finger protein, putative [0.059] | RING finger protein [0.046] | Ring finger protein [0.019] | RING finger family protein [0.012] | RING finger-like protein [0.006] | E3 ubiquitin-protein ligase [0.006] | Ring-H2 zinc finger protein [0.006] | RING-H2 finger protein ATL3C [0.004] | RING zinc finger protein-like [0.003] | RING finger-like [0.003] | RING…	RING/U-box superfamily protein | Zinc finger, C3HC4 type (RING finger) family protein | AtL5 | TOXICOS EN LEVADURA 4 | COP1-interacting protein 8 | TOXICOS EN LEVADURA 2 | TOXICOS EN LEVADURA 63 | carbon/nitrogen insensitive 1 | RING-H2 finger A3A | RING-H2 finger A3B	Ring finger domain (PF13639) [0.946] | zinc-ribbon (PF14369) [0.030] | RING-like zinc finger (PF17123) [0.012] | RING-H2 zinc finger domain (PF12678) [0.007] | Cytochrome P450 (PF00067) [0.001]	Zinc finger, RING-type (IPR001841) [0.956] | Zinc finger, RING-H2-type (IPR024766) [0.007] | Cytochrome P450 (IPR001128) [0.001]	zinc ion binding (GO:0008270) [0.935] | protein binding (GO:0005515) [0.928] | iron ion binding (GO:0005506) [0.001] | oxidoreductase activity, acting on paired donors, with incorporation or reduction of molecular oxygen (GO:0016705) [0.001] | heme binding (GO:0020037) [0.001]	oxidation-reduction process (GO:0055114) [0.001]	NULL / Representative annotation below 0.1%
OG11	23	19	65	68	40	746	108	59	74	10	99	14	248	71	81	7	331	28	17	1	8	0	5	13	0	2	18	7	429	56	38	31	35	45	70	88	F-box family protein [0.367] | F-box protein [0.337] | F-box and associated interaction domains-containing protein [0.117] | F-box/kelch-repeat protein [0.069] | F-box [0.041] | F-box family protein, putative [0.026] | F-box protein interaction domain containing protein, expressed [0.004] | F-box domain-containing protein [0.004] | Class S F-box protein [0.003] | F-box domain containing protein, …	F-box family protein | F-box and associated interaction domains-containing protein | F-box associated ubiquitination effector family protein	F-box domain (PF00646) [0.606] | F-box associated (PF07734) [0.293] | F-box associated domain (PF08268) [0.113] | F-box-like (PF12937) [0.067] | Histidine kinase-, DNA gyrase B-, and HSP90-like ATPase (PF02518) [0.001] | Protein kinase domain (PF00069) [0.001] | Peptidase family M41 (PF01434) [0.001]	F-box domain (IPR001810) [0.673] | F-box associated domain, type 1 (IPR006527) [0.293] | F-box associated domain, type 3 (IPR013187) [0.113] | Histidine kinase-like ATPase, C-terminal domain (IPR003594) [0.001] | Peptidase M41 (IPR000642) [0.001] | Protein kinase domain (IPR000719) [0.001]	protein binding (GO:0005515) [0.673] | ATP binding (GO:0005524) [0.003] | protein kinase activity (GO:0004672) [0.001] | metalloendopeptidase activity (GO:0004222) [0.001]	proteolysis (GO:0006508) [0.001] | protein phosphorylation (GO:0006468) [0.001]	NULL / Representative annotation below 0.1%
OG12	55	58	60	72	63	111	66	71	82	83	92	31	108	84	42	65	68	60	54	83	13	61	96	88	88	18	65	36	19	19	17	46	118	116	225	464	Subtilase family protein [0.435] | Subtilisin-like serine protease [0.138] | Subtilase [0.111] | Subtilisin-like protease [0.106] | subtilase family protein [0.067] | Subtilisin-like serine endopeptidase family protein [0.042] | Serine protease [0.029] | Subtilase, putative [0.013] | Serine protease-like protein [0.013] | Subtilisin-like protein [0.005] | subtilisin-like serine protease 2 [0.004]…	Subtilase family protein | Subtilisin-like serine endopeptidase family protein | subtilase family protein | PA-domain containing subtilase family protein | subtilase 4.13 | subtilisin-like serine protease 2 | subtilase 3.12 | subtilisin-like serine protease 3 | subtilisin-like serine protease-related | subtilase 1.3 | subtilase 4.12 | xylem serine peptidase 1	Subtilase family (PF00082) [0.913] | Peptidase inhibitor I9 (PF05922) [0.775] | PA domain (PF02225) [0.414] | Fn3-like domain (PF06280) [0.017] | Ankyrin repeats (3 copies) (PF12796) [0.001] | Ankyrin repeats (many copies) (PF13857) [0.001] | Transglycosylase SLT domain (PF13406) [0.001] | Hsp70 protein (PF00012) [0.001] | Protein phosphatase 2A regulatory B subunit (B56 family) (PF01603) [0.001]…	Peptidase S8/S53 domain (IPR000209) [0.913] | Peptidase S8 propeptide/proteinase inhibitor I9 (IPR010259) [0.775] | PA domain (IPR003137) [0.414] | Fn3-like domain (IPR010435) [0.017] | Transglycosylase SLT domain 2 (IPR031304) [0.001] | Ankyrin repeat-containing domain (IPR020683) [0.001] | Late embryogenesis abundant protein, LEA-14 (IPR004864) [0.001] | Phosphate-induced protein 1 (IPR006766) …	serine-type endopeptidase activity (GO:0004252) [0.913] | transferase activity, transferring acyl groups other than amino-acyl groups (GO:0016747) [0.001] | double-stranded DNA binding (GO:0003690) [0.001] | polygalacturonase activity (GO:0004650) [0.001] | protein phosphatase regulator activity (GO:0019888) [0.001] | zinc ion binding (GO:0008270) [0.001] | protein kinase activity (GO:0004672) [0…	proteolysis (GO:0006508) [0.913] | regulation of transcription, DNA-templated (GO:0006355) [0.001] | signal transduction (GO:0007165) [0.001] | carbohydrate metabolic process (GO:0005975) [0.001] | protein phosphorylation (GO:0006468) [0.001]	membrane (GO:0016020) [0.017] | cell wall (GO:0005618) [0.017] | protein phosphatase type 2A complex (GO:0000159) [0.001] | integral component of membrane (GO:0016021) [0.001]
OG13	69	50	69	89	74	68	65	79	111	58	57	60	76	67	41	62	42	61	68	135	88	45	37	93	19	23	8	17	11	8	502	162	33	14	14	24	NAC domain protein [0.423] | NAC domain-containing protein, putative [0.343] | NAC domain-containing protein [0.090] | NAC domain-containing protein 78 [0.017] | NAC domain-containing protein 68 [0.009] | NAC protein [0.006] | NAC-domain protein [0.005] | NAC domain containing protein 2 [0.005] | NAC domain containing protein 35 [0.005] | NAC [0.005] | NAC domain containing protein 62 [0.005] | N…	NAC (No Apical Meristem) domain transcriptional regulator superfamily protein | NAC domain containing protein 3 | NAC domain containing protein 80 | NAC domain containing protein 35 | NAC domain containing protein 100 | NAC-domain protein 101 | Arabidopsis NAC domain containing protein 87 | TCV-interacting protein | NAC 007 | vascular related NAC-domain protein 1 | NAC domain containing protein 3…	No apical meristem (NAM) protein (PF02365) [0.988] | HECT-domain (ubiquitin-transferase) (PF00632) [0.002] | 2OG-Fe(II) oxygenase superfamily (PF03171) [0.001] | Ribosomal protein L16p/L10e (PF00252) [0.001] | Peptidase family M20/M25/M40 (PF01546) [0.001] | VQ motif (PF05678) [0.001] | SSXT protein (N-terminal region) (PF05030) [0.001] | PPR repeat (PF01535) [0.001]	NAC domain (IPR003441) [0.988] | HECT domain (IPR000569) [0.002] | Oxoglutarate/iron-dependent dioxygenase (IPR005123) [0.001] | VQ (IPR008889) [0.001] | Ribosomal protein L10e/L16 (IPR016180) [0.001] | Peptidase M20 (IPR002933) [0.001] | SS18 family (IPR007726) [0.001] | Pentatricopeptide repeat (IPR002885) [0.001]	DNA binding (GO:0003677) [0.988] | ubiquitin-protein transferase activity (GO:0004842) [0.002] | transcription coactivator activity (GO:0003713) [0.001] | structural constituent of ribosome (GO:0003735) [0.001] | oxidoreductase activity (GO:0016491) [0.001] | hydrolase activity (GO:0016787) [0.001]	regulation of transcription, DNA-templated (GO:0006355) [0.988] | oxidation-reduction process (GO:0055114) [0.001] | translation (GO:0006412) [0.001] | metabolic process (GO:0008152) [0.001]	ribosome (GO:0005840) [0.001]
OG14	50	40	53	69	67	92	49	72	75	52	78	35	59	30	71	62	60	92	86	76	24	31	67	175	63	36	34	29	20	16	22	14	1953	1382	729	723	Peroxidase [0.566] | Peroxidase family protein [0.143] | Peroxidase superfamily protein [0.101] | Peroxidase, putative [0.035] | Peroxidase protein [0.028] | Peroxidase 57, putative [0.018] | Peroxidase 1 [0.013] | Peroxidase 60, putative [0.008] | Peroxidase-like protein [0.007] | Peroxidase like protein [0.007] | Peroxidase 2 [0.005] | Peroxidase 27, putative [0.004] | Peroxidase (Precursor) [0…	Peroxidase superfamily protein | peroxidase 2 | peroxidase CA | peroxidase CB | root hair specific 18	Peroxidase (PF00141) [0.993] | Ras family (PF00071) [0.001] | Sugar efflux transporter for intercellular exchange (PF03083) [0.001]	Haem peroxidase, plant/fungal/bacterial (IPR002016) [0.993] | Small GTPase superfamily (IPR001806) [0.001] | SWEET sugar transporter (IPR004316) [0.001]	peroxidase activity (GO:0004601) [0.993] | heme binding (GO:0020037) [0.993] | GTP binding (GO:0005525) [0.001] | GTPase activity (GO:0003924) [0.001]	response to oxidative stress (GO:0006979) [0.993] | oxidation-reduction process (GO:0055114) [0.993]	integral component of membrane (GO:0016021) [0.001]
OG16	201	9	33	60	37	285	64	16	20	11	54	5	155	64	59	15	213	111	94	5	16	3	28	21	0	0	1	2	25	21	21	18	27	39	38	39	F-box family protein [0.271] | F-box/RNI-like/FBD-like domains-containing protein [0.198] | F-box/RNI-like superfamily protein [0.165] | F-box/FBD/LRR-repeat protein [0.100] | FBD-associated F-box protein [0.074] | F-box/LRR-repeat protein [0.042] | F-box domain containing protein, expressed [0.021] | F-box domain containing protein [0.016] | F-box protein [0.015] | Cyclin-like F-box [0.012] | F-…	F-box/RNI-like superfamily protein | F-box/RNI-like/FBD-like domains-containing protein | F-box family protein | RNI-like superfamily protein | FBD, F-box and Leucine Rich Repeat domains containing protein | Protein with RNI-like/FBD-like domains | FBD-like domain family protein | FBD / Leucine Rich Repeat domains containing protein | F-box/FBD-like domains containing protein | FBD, F-box, Skp2-l…	F-box domain (PF00646) [0.588] | FBD (PF08387) [0.502] | Leucine Rich Repeat (PF07723) [0.213] | F-box-like (PF12937) [0.022] | Auxin responsive protein (PF02519) [0.001] | bZIP transcription factor (PF00170) [0.001] | Reverse transcriptase-like (PF13456) [0.001] | TAZ zinc finger (PF02135) [0.001] | KIX domain (PF16987) [0.001] | TIP49 C-terminus (PF06068) [0.001] | Thi4 family (PF01946) [0.001]…	F-box domain (IPR001810) [0.609] | FBD domain (IPR006566) [0.502] | Leucine-rich repeat 2 (IPR013101) [0.213] | Basic-leucine zipper domain (IPR004827) [0.001] | Small auxin-up RNA (IPR003676) [0.001] | Zinc finger, TAZ-type (IPR000197) [0.001] | RAB6-interacting golgin (IPR007033) [0.001] | TIP49, C-terminal (IPR010339) [0.001] | Transcription elongation factor S-II, central domain (IPR003618) […	protein binding (GO:0005515) [0.609] | transcription factor activity, sequence-specific DNA binding (GO:0003700) [0.001] | sequence-specific DNA binding (GO:0043565) [0.001] | transcription cofactor activity (GO:0003712) [0.001] | DNA helicase activity (GO:0003678) [0.001] | histone acetyltransferase activity (GO:0004402) [0.001] | ferrochelatase activity (GO:0004325) [0.001] | zinc ion binding (…	regulation of transcription, DNA-templated (GO:0006355) [0.003] | response to auxin (GO:0009733) [0.001] | heme biosynthetic process (GO:0006783) [0.001] | transcription, DNA-templated (GO:0006351) [0.001]	nucleus (GO:0005634) [0.001]
OG17	47	29	42	72	58	79	60	47	63	35	66	40	88	101	34	59	62	97	82	53	10	37	59	138	31	30	3	1	202	97	114	114	124	114	123	116	Eukaryotic aspartyl protease family protein [0.948] | Eukaryotic aspartyl protease family protein, expressed [0.027] | Aspartyl protease family protein [0.010] | Aspartic proteinase nepenthesin-1 [0.008] | Aspartyl protease [0.002] | Aspartic proteinase nepenthesin-2, putative [0.001] | Receptor-like protein kinase like protein [0.001] | Voltage-dependent anion channel protein [0.001] | S5 [0.001…	Eukaryotic aspartyl protease family protein	Xylanase inhibitor N-terminal (PF14543) [0.910] | Xylanase inhibitor C-terminal (PF14541) [0.906] | Eukaryotic aspartyl protease (PF00026) [0.005] | Protein kinase domain (PF00069) [0.001] | PAN-like domain (PF08276) [0.001] | WD domain, G-beta repeat (PF00400) [0.001] | MORN repeat (PF02493) [0.001] | Eukaryotic porin (PF01459) [0.001] | Core-2/I-Branching enzyme (PF02485) [0.001]	Xylanase inhibitor, N-terminal (IPR032861) [0.910] | Xylanase inhibitor, C-terminal (IPR032799) [0.906] | Peptidase family A1 domain (IPR033121) [0.005] | Protein kinase domain (IPR000719) [0.001] | Glycosyl transferase, family 14 (IPR003406) [0.001] | WD40 repeat (IPR001680) [0.001] | PAN/Apple domain (IPR003609) [0.001] | Eukaryotic porin/Tom40 (IPR027246) [0.001] | MORN motif (IPR003409) [0.00…	acetylglucosaminyltransferase activity (GO:0008375) [0.001] | protein kinase activity (GO:0004672) [0.001] | ATP binding (GO:0005524) [0.001] | protein binding (GO:0005515) [0.001]	protein phosphorylation (GO:0006468) [0.001] | transmembrane transport (GO:0055085) [0.001]	mitochondrial outer membrane (GO:0005741) [0.001] | membrane (GO:0016020) [0.001]
OG18	54	168	46	86	50	85	54	70	84	45	61	52	77	41	54	34	43	49	50	72	52	29	29	84	13	25	53	180	141	110	607	95	41	82	267	260	MADS-box transcription factor [0.437] | MADS box transcription factor [0.129] | MADS-box transcription factor family protein [0.070] | Mads box protein, putative [0.060] | MADS-box transcription factor 27 [0.029] | Transcription factor MADS box [0.020] | MADS-box family transcription factor [0.015] | MIKC* MADS-box transcription factor [0.015] | MADS-box family protein [0.014] | MADS-box transcri…	K-box region and MADS-box transcription factor family protein | MADS-box transcription factor family protein | AGAMOUS-like 13 | AGAMOUS-like 31 | AGAMOUS-like 85 | AGAMOUS-like 64 | AGAMOUS-like 44 | AGAMOUS-like 57 | AGAMOUS-like 17 | AGAMOUS-like 16 | AGAMOUS-like 82 | AGAMOUS-like 59 | AGAMOUS-like 71 | AGAMOUS-like 58 | AGAMOUS-like 29 | AGAMOUS-like 104 | AGAMOUS-like 79 | AGAMOUS-like 19 |…	SRF-type transcription factor (DNA-binding and dimerisation domain) (PF00319) [0.911] | K-box region (PF01486) [0.453] | AMP-binding enzyme (PF00501) [0.001] | Protein of unknown function, DUF547 (PF04784) [0.001] | Heavy-metal-associated domain (PF00403) [0.001] | STAS domain (PF01740) [0.001] | Sulfate permease family (PF00916) [0.001] | PPR repeat (PF01535) [0.001] | F-box domain (PF00646) [0.…	Transcription factor, MADS-box (IPR002100) [0.911] | Transcription factor, K-box (IPR002487) [0.453] | AMP-dependent synthetase/ligase (IPR000873) [0.001] | SLC26A/SulP transporter domain (IPR011547) [0.001] | Pentatricopeptide repeat (IPR002885) [0.001] | F-box domain (IPR001810) [0.001] | Heavy metal-associated domain, HMA (IPR006121) [0.001] | STAS domain (IPR002645) [0.001] | Domain of unknow…	DNA binding (GO:0003677) [0.911] | protein dimerization activity (GO:0046983) [0.911] | transcription factor activity, sequence-specific DNA binding (GO:0003700) [0.453] | catalytic activity (GO:0003824) [0.001] | protein binding (GO:0005515) [0.001] | sulfate transmembrane transporter activity (GO:0015116) [0.001] | metal ion binding (GO:0046872) [0.001]	regulation of transcription, DNA-templated (GO:0006355) [0.453] | metabolic process (GO:0008152) [0.001] | sulfate transport (GO:0008272) [0.001] | metal ion transport (GO:0030001) [0.001]	nucleus (GO:0005634) [0.453] | integral component of membrane (GO:0016021) [0.001]
OG19	45	49	54	64	71	96	47	70	78	47	76	34	58	50	45	51	49	82	83	60	21	33	45	79	46	20	1	12	9	11	8	5	8	9	11	15	Major facilitator superfamily protein [0.972] | Nitrate transporter [0.010] | Major Facilitator Superfamily protein, expressed [0.008] | Nitrate transporter family protein [0.006] | nitrate transporter 1.6 [0.001] | Peptide transporter [0.001] | SCF ubiquitin ligase [0.001] | nitrate transporter 1.7 [0.001] | Peptide transporter 1 [0.001]	Major facilitator superfamily protein | NITRATE TRANSPORTER 1.8 | peptide transporter 3 | nitrate transporter 1:2 | nitrate transporter 1.1 | nitrate transporter 1.6 | peptide transporter 1 | peptide transporter 5 | nitrate transporter 1.7 | nitrate transporter 1.5 | peptide transporter 2	POT family (PF00854) [0.977] | Glycolipid transfer protein (GLTP) (PF08718) [0.003] | Skp1 family, tetramerisation domain (PF03931) [0.001] | Homeobox KN domain (PF05920) [0.001] | Associated with HOX (PF07526) [0.001] | Skp1 family, dimerisation domain (PF01466) [0.001] | PPR repeat family (PF13041) [0.001] | P21-Rho-binding domain (PF00786) [0.001] | Glycosyl hydrolase family 9 (PF00759) [0.001…	Proton-dependent oligopeptide transporter family (IPR000109) [0.977] | Glycolipid transfer protein domain (IPR014830) [0.003] | Homeobox KN domain (IPR008422) [0.001] | POX domain (IPR006563) [0.001] | SKP1 component, POZ domain (IPR016073) [0.001] | CRIB domain (IPR000095) [0.001] | NDUFAF3/Mth938 domain-containing protein (IPR007523) [0.001] | TRAM/LAG1/CLN8 homology domain (IPR006634) [0.001] …	transporter activity (GO:0005215) [0.977] | glycolipid binding (GO:0051861) [0.002] | glycolipid transporter activity (GO:0017089) [0.002] | DNA binding (GO:0003677) [0.001] | hydrolase activity, hydrolyzing O-glycosyl compounds (GO:0004553) [0.001]	transport (GO:0006810) [0.977] | glycolipid transport (GO:0046836) [0.002] | regulation of transcription, DNA-templated (GO:0006355) [0.001] | ubiquitin-dependent protein catabolic process (GO:0006511) [0.001] | carbohydrate metabolic process (GO:0005975) [0.001]	membrane (GO:0016020) [0.977] | cytoplasm (GO:0005737) [0.003] | integral component of membrane (GO:0016021) [0.001]
OG20	41	14	34	35	27	126	46	122	62	19	20	14	74	18	74	20	94	29	38	15	11	20	62	272	119	5	1	2	2	2	979	102	337	390	458	558	Pentatricopeptide repeat-containing protein [0.404] | Pentatricopeptide repeat-containing protein, putative [0.307] | Pentatricopeptide repeat-containing family protein [0.148] | pentatricopeptide (PPR) repeat-containing protein [0.073] | Pentatricopeptide repeat (PPR) superfamily protein [0.022] | Pentatricopeptide repeat protein [0.013] | Pentatricopeptide repeat protein-like protein [0.005] | …	Pentatricopeptide repeat (PPR) superfamily protein | Tetratricopeptide repeat (TPR)-like superfamily protein | pentatricopeptide (PPR) repeat-containing protein | Pentatricopeptide repeat (PPR-like) superfamily protein | ATP binding;nucleic acid binding;helicases | rna processing factor 2	PPR repeat family (PF13041) [0.932] | PPR repeat (PF12854) [0.695] | PPR repeat (PF01535) [0.563] | Pentatricopeptide repeat domain (PF13812) [0.104] | Pentacotripeptide-repeat region of PROPR (PF17177) [0.010] | Protein phosphatase 2C (PF00481) [0.001] | Exostosin family (PF03016) [0.001] | Membrane transport protein (PF03547) [0.001] | Arginosuccinate synthase (PF00764) [0.001] | Protein of unk…	Pentatricopeptide repeat (IPR002885) [0.990] | Pentacotripeptide-repeat region of PROPR (IPR033443) [0.010] | PPM-type phosphatase domain (IPR001932) [0.001] | Protein of unknown function DUF679 (IPR007770) [0.001] | Phosphatidylethanolamine-binding protein (IPR008914) [0.001] | Protein dehydration-induced 19, C-terminal (IPR027935) [0.001] | Membrane transport protein (IPR004776) [0.001] | PC-Es…	catalytic activity (GO:0003824) [0.001] | ATP binding (GO:0005524) [0.001] | hydrolase activity (GO:0016787) [0.001] | argininosuccinate synthase activity (GO:0004055) [0.001] | DNA binding (GO:0003677) [0.001]	arginine biosynthetic process (GO:0006526) [0.001] | transmembrane transport (GO:0055085) [0.001]	integral component of membrane (GO:0016021) [0.001]
OG21	32	6	121	193	81	161	85	84	92	57	74	0	22	17	22	34	19	42	24	79	3	40	62	40	9	1	7	10	107	80	136	188	183	172	164	157	Receptor-like protein kinase [0.311] | Leucine-rich receptor-like protein kinase family protein [0.116] | Receptor-like protein [0.109] | Receptor protein kinase-like protein [0.070] | Cf-4/9 disease resistance-like family protein [0.064] | Receptor-like kinase [0.046] | Leucine-rich repeat receptor-like protein kinase family protein [0.033] | Serine/threonine-protein kinase bri1, putative [0.024…	Leucine-rich repeat (LRR) family protein | receptor like protein 47 | receptor like protein 38 | receptor like protein 22 | receptor like protein 54 | receptor like protein 23 | receptor like protein 19 | receptor like protein 25 | receptor like protein 32 | receptor like protein 43 | receptor like protein 31 | receptor like protein 50 | disease resistance family protein / LRR family protein | re…	Leucine rich repeat (PF13855) [0.818] | Leucine Rich Repeat (PF00560) [0.627] | Leucine rich repeat N-terminal domain (PF08263) [0.593] | Leucine Rich repeat (PF13516) [0.257] | Leucine Rich repeats (2 copies) (PF12799) [0.082] | Leucine Rich Repeat (PF07723) [0.001] | ATP synthase (C/AC39) subunit (PF01992) [0.001] | Di-glucose binding within endoplasmic reticulum (PF11721) [0.001] | Rab3 GTPase…	Leucine-rich repeat (IPR001611) [0.905] | Leucine-rich repeat-containing N-terminal, plant-type (IPR013210) [0.593] | Leucine rich repeat 4 (IPR025875) [0.082] | ATPase, V0 complex, c/d subunit (IPR002843) [0.001] | Leucine-rich repeat 2 (IPR013101) [0.001] | Serine-threonine/tyrosine-protein kinase, catalytic domain (IPR001245) [0.001] | Peptidase M41 (IPR000642) [0.001] | EF-hand domain (IPR002…	protein binding (GO:0005515) [0.905] | ATP binding (GO:0005524) [0.001] | ATPase activity (GO:0016887) [0.001] | metalloendopeptidase activity (GO:0004222) [0.001] | microtubule binding (GO:0008017) [0.001] | calcium ion binding (GO:0005509) [0.001] | protein kinase activity (GO:0004672) [0.001]	multicellular organism development (GO:0007275) [0.001] | proteolysis (GO:0006508) [0.001] | ubiquitin-dependent protein catabolic process (GO:0006511) [0.001] | protein phosphorylation (GO:0006468) [0.001]	nucleus (GO:0005634) [0.001]
OG22	4	104	232	1	4	110	2	17	5	3	70	562	0	63	34	0	3	9	1	0	9	45	5	2	2	29	15	3	4	7	5	7	18	20	21	22	Retrotransposon protein, putative, Ty3-gypsy subclass [0.128] | Retroelement pol polyprotein-like [0.086] | Polyprotein [0.084] | Gag-pol polyprotein [0.074] | Integrase [0.052] | Retrotransposon gag protein [0.037] | Pol polyprotein [0.034] | Reverse transcriptase [0.021] | Retrotransposon protein, putative, unclassified [0.018] | Polyprotein, putative [0.016] | Zinc knuckle family protein [0.01…	DNA/RNA polymerases superfamily protein | GAG/POL/ENV polyprotein	Reverse transcriptase (RNA-dependent DNA polymerase) (PF00078) [0.113] | Integrase core domain (PF00665) [0.111] | Retroviral aspartyl protease (PF08284) [0.042] | Chromo (CHRromatin Organisation MOdifier) domain (PF00385) [0.040] | Zinc knuckle (PF00098) [0.014] | Aspartyl protease (PF13650) [0.014] | His(2)-Cys(2) zinc finger (PF09337) [0.005] | F-box associated domain (PF08268) [0.002] | Glyce…	Reverse transcriptase domain (IPR000477) [0.113] | Integrase, catalytic core (IPR001584) [0.111] | Retroviral aspartyl protease (IPR013242) [0.042] | Chromo domain (IPR023780) [0.040] | Zinc finger, CCHC-type (IPR001878) [0.014] | Zinc finger, H2C2-type, histone UAS binding (IPR015416) [0.005] | F-box associated domain, type 3 (IPR013187) [0.002] | Gnk2-homologous domain (IPR002902) [0.001] | Gly…	nucleic acid binding (GO:0003676) [0.014] | zinc ion binding (GO:0008270) [0.014] | DNA binding (GO:0003677) [0.002] | protein dimerization activity (GO:0046983) [0.001] | phosphoric diester hydrolase activity (GO:0008081) [0.001] | transcription factor activity, sequence-specific DNA binding (GO:0003700) [0.001] | protein binding (GO:0005515) [0.001]	DNA integration (GO:0015074) [0.111] | tRNA processing (GO:0008033) [0.001] | lipid metabolic process (GO:0006629) [0.001] | regulation of transcription, DNA-templated (GO:0006355) [0.001]	NULL / Representative annotation below 0.1%
OG23	2	16	7	12	5	18	4	2	20	6	23	3	3	7	5	28	11	7	2	9	37	7	134	397	518	2	1	2	2	2	1	1020	1029	1022	1020	1020	Pentatricopeptide repeat-containing protein [0.402] | Pentatricopeptide repeat-containing protein, putative [0.321] | Pentatricopeptide repeat-containing family protein [0.130] | Pentatricopeptide repeat (PPR) superfamily protein [0.079] | Pentatricopeptide repeat protein [0.026] | Pentatricopeptide repeat (PPR-like) superfamily protein [0.018] | pentatricopeptide (PPR) repeat-containing protein …	Pentatricopeptide repeat (PPR-like) superfamily protein	PPR repeat (PF01535) [0.820] | PPR repeat family (PF13041) [0.452] | PPR repeat (PF12854) [0.070] | Pentatricopeptide repeat domain (PF13812) [0.032] | DYW family of nucleic acid deaminases (PF14432) [0.015] | Tetratricopeptide repeat (PF07721) [0.002] | IGR protein motif (PF09597) [0.002] | Photosystem II 10 kDa polypeptide PsbR (PF04725) [0.001] | Mitochondrial carrier protein (PF00153) [0.001]…	Pentatricopeptide repeat (IPR002885) [0.931] | DYW domain (IPR032867) [0.015] | Tetratricopeptide TPR-4 (IPR011717) [0.002] | IGR protein motif (IPR019083) [0.002] | Photosystem II PsbR (IPR006814) [0.001] | Mitochondrial substrate/solute carrier (IPR018108) [0.001] | Domain of unknown function DUF4283 (IPR025558) [0.001] | RNA polymerase Rpb2, domain 3 (IPR007645) [0.001] | Zinc finger, LSD1-typ…	zinc ion binding (GO:0008270) [0.015] | identical protein binding (GO:0042802) [0.002] | DNA binding (GO:0003677) [0.001] | DNA-directed 5'-3' RNA polymerase activity (GO:0003899) [0.001]	transcription, DNA-templated (GO:0006351) [0.001] | photosynthesis (GO:0015979) [0.001]	thylakoid membrane (GO:0042651) [0.001] | photosystem II (GO:0009523) [0.001] | photosystem II oxygen evolving complex (GO:0009654) [0.001]
OG24	13	10	70	192	72	132	66	40	93	18	24	1	94	11	10	24	96	52	35	17	13	27	25	53	38	2	1	1	1	1	427	123	144	224	214	306	Kinase, putative [0.236] | Receptor-like protein kinase [0.173] | Kinase-like protein [0.164] | Receptor-like kinase [0.107] | Protein kinase family protein [0.064] | Kinase family protein [0.059] | Stress-induced receptor-like kinase [0.035] | Receptor serine/threonine kinase, putative [0.031] | Protein kinase [0.022] | Protein kinase superfamily protein [0.021] | Kinase R-like protein [0.013] |…	Protein kinase superfamily protein | receptor serine/threonine kinase, putative | Protein kinase family protein | PR5-like receptor kinase | Malectin/receptor-like protein kinase family protein	Protein kinase domain (PF00069) [0.673] | Protein tyrosine kinase (PF07714) [0.231] | Wall-associated receptor kinase galacturonan-binding (PF13947) [0.231] | Wall-associated receptor kinase C-terminal (PF14380) [0.116] | Glutaredoxin (PF00462) [0.005] | Thaumatin family (PF00314) [0.004] | Leucine rich repeat N-terminal domain (PF08263) [0.003] | Cytochrome b5-like Heme/Steroid binding domain (P…	Protein kinase domain (IPR000719) [0.673] | Wall-associated receptor kinase, galacturonan-binding domain (IPR025287) [0.231] | Serine-threonine/tyrosine-protein kinase, catalytic domain (IPR001245) [0.231] | Wall-associated receptor kinase, C-terminal (IPR032872) [0.116] | Glutaredoxin (IPR002109) [0.005] | Thaumatin (IPR001938) [0.004] | Leucine-rich repeat-containing N-terminal, plant-type (IPR…	protein kinase activity (GO:0004672) [0.884] | ATP binding (GO:0005524) [0.673] | polysaccharide binding (GO:0030247) [0.231] | protein disulfide oxidoreductase activity (GO:0015035) [0.005] | electron carrier activity (GO:0009055) [0.005] | protein binding (GO:0005515) [0.002] | ATPase activity (GO:0016887) [0.001] | carbohydrate binding (GO:0030246) [0.001] | GTP binding (GO:0005525) [0.001] | …	protein phosphorylation (GO:0006468) [0.884] | cell redox homeostasis (GO:0045454) [0.005] | defense response to bacterium (GO:0042742) [0.002] | defense response to fungus (GO:0050832) [0.002] | intracellular protein transport (GO:0006886) [0.001] | vesicle-mediated transport (GO:0016192) [0.001] | carbohydrate metabolic process (GO:0005975) [0.001] | recognition of pollen (GO:0048544) [0.001]	membrane (GO:0016020) [0.001]
OG25	52	31	46	47	59	115	60	85	68	36	69	30	103	27	28	50	33	28	37	28	31	26	20	49	16	18	38	13	12	9	13	11	1540	316	243	242	SAUR-like auxin-responsive protein family [0.961] | Auxin responsive SAUR protein [0.009] | Auxin responsive protein [0.005] | Auxin-induced protein-like protein [0.004] | Auxin-induced SAUR-like protein [0.003] | Auxin-responsive family protein [0.003] | Auxin responsive family-like protein [0.002] | SAUR31-auxin-responsive SAUR family member [0.002] | Auxin responsive protein-like [0.002] | SAU…	SAUR-like auxin-responsive protein family	Auxin responsive protein (PF02519) [0.998] | Glycosyl hydrolases family 17 (PF00332) [0.001] | Reverse transcriptase-like (PF13456) [0.001] | Ribonuclease HII (PF01351) [0.001] | Protein kinase domain (PF00069) [0.001]	Small auxin-up RNA (IPR003676) [0.998] | Protein kinase domain (IPR000719) [0.001] | Ribonuclease HII/HIII domain (IPR024567) [0.001] | Glycoside hydrolase family 17 (IPR000490) [0.001]	protein kinase activity (GO:0004672) [0.001] | ATP binding (GO:0005524) [0.001] | hydrolase activity, hydrolyzing O-glycosyl compounds (GO:0004553) [0.001]	response to auxin (GO:0009733) [0.998] | carbohydrate metabolic process (GO:0005975) [0.001] | protein phosphorylation (GO:0006468) [0.001]	NULL / Representative annotation below 0.1%
OG26	7	52	224	0	3	154	41	95	4	0	75	1	0	356	20	5	58	13	4	0	12	13	3	24	1	26	19	37	31	70	35	37	80	74	64	76	RNA-directed DNA polymerase (Reverse transcriptase) [0.092] | Retrotransposon protein, putative, unclassified [0.086] | Ribonuclease H-like superfamily protein [0.077] | RNA-directed DNA polymerase (reverse transcriptase)-related family protein [0.065] | zinc ion binding;nucleic acid binding [0.035] | Polynucleotidyl transferase, ribonuclease H-like superfamily protein [0.026] | DNAse I-like supe…	RNA-directed DNA polymerase (reverse transcriptase)-related family protein | DNAse I-like superfamily protein | RNA-directed DNA polymerase (reverse transcriptase) | Ribonuclease H-like superfamily protein	zinc-binding in reverse transcriptase (PF13966) [0.096] | Domain of unknown function (DUF4283) (PF14111) [0.090] | Reverse transcriptase (RNA-dependent DNA polymerase) (PF00078) [0.083] | Reverse transcriptase-like (PF13456) [0.066] | Zinc knuckle (PF14392) [0.010] | Endonuclease/Exonuclease/phosphatase family (PF03372) [0.007] | Response regulator receiver domain (PF00072) [0.002] | Mitovirus RN…	Reverse transcriptase zinc-binding domain (IPR026960) [0.096] | Domain of unknown function DUF4283 (IPR025558) [0.090] | Reverse transcriptase domain (IPR000477) [0.083] | Zinc knuckle CX2CX4HX4C (IPR025836) [0.010] | Endonuclease/exonuclease/phosphatase (IPR005135) [0.008] | Signal transduction response regulator, receiver domain (IPR001789) [0.002] | RNA-dependent RNA polymerase, mitoviral (IPR…	protein binding (GO:0005515) [0.002] | nucleic acid binding (GO:0003676) [0.002] | GTPase activator activity (GO:0005096) [0.001] | iron ion binding (GO:0005506) [0.001] | oxidoreductase activity, acting on paired donors, with incorporation or reduction of molecular oxygen (GO:0016705) [0.001] | transcription factor activity, sequence-specific DNA binding (GO:0003700) [0.001] | RNA binding (GO:00…	regulation of transcription, DNA-templated (GO:0006355) [0.002] | phosphorelay signal transduction system (GO:0000160) [0.002] | oxidation-reduction process (GO:0055114) [0.001] | transmembrane transport (GO:0055085) [0.001] | carbohydrate metabolic process (GO:0005975) [0.001] | cation transport (GO:0006812) [0.001]	nucleus (GO:0005634) [0.001] | integral component of membrane (GO:0016021) [0.001]
OG27	27	11	21	118	25	31	58	40	71	27	24	6	43	9	59	83	41	134	71	56	26	50	18	21	7	2	1	1	1	1	2	1	492	480	372	184	Wall-associated kinase family protein [0.484] | Kinase, putative [0.134] | Protein kinase family protein [0.068] | Wall-associated receptor kinase 5 [0.042] | Wall-associated receptor kinase 3 [0.041] | Wall-associated receptor kinase 2 [0.033] | Protein kinase-related protein [0.029] | Protein kinase [0.019] | Wall-associated kinase, putative [0.016] | Wall-associated receptor kinase-like protei…	Wall-associated kinase family protein | Protein kinase superfamily protein | Protein kinase family protein | wall-associated kinase, putative | cell wall-associated kinase | wall associated kinase-like 6 | wall associated kinase 5 | wall associated kinase 3 | wall associated kinase 4 | wall associated kinase-like 1 | wall associated kinase-like 2 | wall associated kinase-like 4 | wall associated …	Wall-associated receptor kinase galacturonan-binding (PF13947) [0.683] | Protein kinase domain (PF00069) [0.581] | Calcium-binding EGF domain (PF07645) [0.259] | Protein tyrosine kinase (PF07714) [0.252] | Wall-associated kinase (PF08488) [0.154] | LysM domain (PF01476) [0.011] | EGF-like domain (PF00008) [0.008] | Complement Clr-like EGF-like (PF12662) [0.006] | EGF domain (PF12947) [0.005] | Hu…	Wall-associated receptor kinase, galacturonan-binding domain (IPR025287) [0.683] | Protein kinase domain (IPR000719) [0.581] | EGF-like calcium-binding domain (IPR001881) [0.259] | Serine-threonine/tyrosine-protein kinase, catalytic domain (IPR001245) [0.252] | Wall-associated receptor kinase (IPR013695) [0.154] | LysM domain (IPR018392) [0.011] | EGF-like domain (IPR000742) [0.008] | Complement …	protein kinase activity (GO:0004672) [0.816] | polysaccharide binding (GO:0030247) [0.683] | ATP binding (GO:0005524) [0.581] | calcium ion binding (GO:0005509) [0.259] | protein serine/threonine kinase activity (GO:0004674) [0.154] | protein binding (GO:0005515) [0.008] | transferase activity, transferring acyl groups other than amino-acyl groups (GO:0016747) [0.001] | electron carrier activity …	protein phosphorylation (GO:0006468) [0.816]	integral component of membrane (GO:0016021) [0.154]
OG28	25	0	60	137	8	18	14	14	106	56	14	0	12	1	35	9	119	15	6	6	18	34	60	281	11	14	1	1	1	1	267	254	210	173	148	185	NBS-LRR type disease resistance protein [0.332] | Disease resistance protein [0.222] | Disease resistance protein (CC-NBS-LRR class) family [0.086] | Disease resistance family protein [0.050] | Disease resistance protein RPS2 [0.045] | Disease resistance protein RPS5, putative [0.034] | Disease resistance protein RPM1, putative [0.028] | Disease resistance protein RGA2, putative [0.017] | Nucleot…	Disease resistance protein (CC-NBS-LRR class) family | LRR and NB-ARC domains-containing disease resistance protein | NB-ARC domain-containing disease resistance protein | P-loop containing nucleoside triphosphate hydrolases superfamily protein | RPS5-like 1 | ATP binding;GTP binding;nucleotide binding;nucleoside-triphosphatases	NB-ARC domain (PF00931) [0.870] | Leucine rich repeat (PF13855) [0.433] | BED zinc finger (PF02892) [0.008] | Zinc finger, ZZ type (PF00569) [0.006] | Protein tyrosine kinase (PF07714) [0.006] | Arabidopsis broad-spectrum mildew resistance protein RPW8 (PF05659) [0.004] | Leucine Rich Repeat (PF00560) [0.003] | TIR domain (PF01582) [0.002] | Tetratricopeptide repeat (PF14559) [0.001] | AIG1 famil…	NB-ARC (IPR002182) [0.870] | Leucine-rich repeat (IPR001611) [0.436] | Zinc finger, BED-type (IPR003656) [0.008] | Serine-threonine/tyrosine-protein kinase, catalytic domain (IPR001245) [0.006] | Zinc finger, ZZ-type (IPR000433) [0.006] | Powdery mildew resistance protein, RPW8 domain (IPR008808) [0.004] | Toll/interleukin-1 receptor homology (TIR) domain (IPR000157) [0.002] | Integrase, catalyti…	ADP binding (GO:0043531) [0.870] | protein binding (GO:0005515) [0.437] | DNA binding (GO:0003677) [0.008] | zinc ion binding (GO:0008270) [0.007] | protein kinase activity (GO:0004672) [0.007] | GTP binding (GO:0005525) [0.001] | catalytic activity (GO:0003824) [0.001] | ATP binding (GO:0005524) [0.001]	protein phosphorylation (GO:0006468) [0.007] | signal transduction (GO:0007165) [0.002] | DNA integration (GO:0015074) [0.001]	NULL / Representative annotation below 0.1%
OG30	28	25	55	75	26	51	52	47	68	50	55	7	17	13	33	24	24	49	54	23	33	10	43	44	40	0	143	43	99	426	420	407	398	382	366	358	Glutathione s-transferase, putative [0.475] | Glutathione S-transferase [0.298] | Glutathione S-transferase family protein [0.071] | Glutathione S-transferase-like protein [0.034] | Tau class glutathione S-transferase [0.034] | Glutathione S-transferase protein [0.027] | Glutathione-S-transferase [0.025] | Glutathione S-transferase GSTU6, putative, expressed [0.005] | Glutathione transferase [0.0…	glutathione S-transferase tau 7 | Glutathione S-transferase family protein | glutathione S-transferase tau 2 | glutathione S-transferase tau 26 | glutathione S-transferase TAU 11 | glutathione S-transferase TAU 10 | glutathione S-transferase TAU 19 | glutathione S-transferase TAU 28 | glutathione S-transferase TAU 23 | glutathione S-transferase TAU 25 | glutathione S-transferase TAU 22 | glutathi…	Glutathione S-transferase, N-terminal domain (PF02798) [0.686] | Glutathione S-transferase, C-terminal domain (PF00043) [0.427] | Glutathione S-transferase, C-terminal domain (PF13410) [0.328] | Glutathione S-transferase, N-terminal domain (PF13417) [0.228] | Glutathione S-transferase, C-terminal domain (PF14497) [0.003] | Glutathione S-transferase, C-terminal domain (PF16865) [0.002] | Glutathio…	Glutathione S-transferase, N-terminal (IPR004045) [0.911] | Glutathione S-transferase, C-terminal (IPR004046) [0.430] | Reverse transcriptase zinc-binding domain (IPR026960) [0.001]	protein binding (GO:0005515) [0.911]	NULL / Representative annotation below 0.1%	NULL / Representative annotation below 0.1%
OG31	29	26	29	28	41	45	36	45	46	33	39	18	55	34	20	35	26	28	24	52	37	20	11	124	12	24	62	236	200	247	225	210	675	663	653	657	LOB domain-containing protein, putative [0.565] | LOB domain-containing protein [0.167] | LOB domain protein [0.123] | LOB domain family protein [0.059] | LOB domain-containing protein 6 [0.020] | LOB domain protein 6 [0.019] | LOB domain-containing protein 25 [0.003] | LOB domain protein 22 [0.003] | LOB domain-containing protein 2 [0.002] | LOB domain protein 12, putative, expressed [0.002] | L…	Lateral organ boundaries (LOB) domain family protein | LOB domain-containing protein 14 | LOB domain-containing protein 15 | LOB domain-containing protein 20 | LOB domain-containing protein 13 | LOB domain-containing protein 1 | LOB domain-containing protein 7 | LOB domain-containing protein 19 | LOB domain-containing protein 10 | LOB domain-containing protein 18 | LOB domain-containing protein 2…	Protein of unknown function DUF260 (PF03195) [0.961] | Lateral organ boundaries (LOB) domain (PF03195) [0.037] | Poly(ADP-ribose) polymerase catalytic domain (PF00644) [0.001] | Ankyrin repeats (3 copies) (PF12796) [0.001]	Lateral organ boundaries, LOB (IPR004883) [0.998] | Ankyrin repeat-containing domain (IPR020683) [0.001] | Poly(ADP-ribose) polymerase, catalytic domain (IPR012317) [0.001]	NAD+ ADP-ribosyltransferase activity (GO:0003950) [0.001]	NULL / Representative annotation below 0.1%	NULL / Representative annotation below 0.1%
OG32	46	24	26	31	48	50	61	58	44	34	21	16	22	14	22	24	52	38	39	30	17	15	26	77	21	11	23	134	79	79	71	76	67	69	60	85	Beta-glucosidase [0.488] | Beta-glucosidase, putative [0.343] | Beta glucosidase [0.038] | Beta-glucosidase-like protein [0.032] | Beta-glucosidase 22 [0.009] | beta glucosidase 11 [0.005] | beta glucosidase 42 [0.005] | Beta-glucosidase 12 [0.005] | Beta-glucosidase 5 [0.003] | Beta-glucosidase 20 [0.003] | Beta-glucosidase 30 [0.003] | beta-glucosidase 47 [0.002] | Beta-glucosidase 24 [0.002] |…	Glycosyl hydrolase superfamily protein | beta glucosidase 2 | beta glucosidase 15 | beta glucosidase 36 | beta glucosidase 25 | beta glucosidase 33 | beta glucosidase 40 | beta glucosidase 43 | beta glucosidase 17 | beta glucosidase 4 | beta glucosidase 7 | beta glucosidase 46 | beta glucosidase 31 | beta glucosidase 27 | B-S glucosidase 44 | beta glucosidase 29 | beta glucosidase 34 | beta gluco…	Glycosyl hydrolase family 1 (PF00232) [0.995] | BTB/POZ domain (PF02214) [0.001] | No apical meristem (NAM) protein (PF02365) [0.001] | Protein of unknown function (DUF1218) (PF06749) [0.001] | Triose-phosphate Transporter family (PF03151) [0.001]	Glycoside hydrolase family 1 (IPR001360) [0.995] | Protein of unknown function DUF1218 (IPR009606) [0.001] | Potassium channel tetramerisation-type BTB domain (IPR003131) [0.001] | Sugar phosphate transporter domain (IPR004853) [0.001] | NAC domain (IPR003441) [0.001]	hydrolase activity, hydrolyzing O-glycosyl compounds (GO:0004553) [0.995] | DNA binding (GO:0003677) [0.001]	carbohydrate metabolic process (GO:0005975) [0.995] | regulation of transcription, DNA-templated (GO:0006355) [0.001] | protein homooligomerization (GO:0051260) [0.001]	NULL / Representative annotation below 0.1%
OG33	17	17	21	72	30	33	39	28	43	40	35	24	36	17	26	20	68	36	43	32	8	20	36	70	47	6	1	1	1	1	1765	1338	1375	1383	1383	1400	Cytochrome P450 [0.444] | Cytochrome P450, putative [0.345] | Cytochrome P450 family protein [0.108] | Cytochrome P450 monooxygenase [0.039] | Cytochrome P450-like [0.022] | Cytochrome P450 family protein, expressed [0.009] | Cytochrome P450 superfamily protein [0.008] | Cytochrome P450-like protein [0.005] | Cytochrome P450 CYP72A129 [0.003] | cytochrome p450 72c1 [0.002] | Cytochrome P450 734A6…	cytochrome P450, family 72, subfamily A, polypeptide 15 | cytochrome P450, family 709, subfamily B, polypeptide 2 | cytochrome P450, family 72, subfamily A, polypeptide 14 | cytochrome P450, family 72, subfamily A, polypeptide 7 | cytochrome P450, family 709, subfamily B, polypeptide 1 | cytochrome P450, family 72, subfamily A, polypeptide 11 | cytochrome P450, family 715, subfamily A, polypeptid…	Cytochrome P450 (PF00067) [0.970] | Protein tyrosine kinase (PF07714) [0.002] | Di-glucose binding within endoplasmic reticulum (PF11721) [0.001] | pfkB family carbohydrate kinase (PF00294) [0.001] | Tetrahydrofolate dehydrogenase/cyclohydrolase, NAD(P)-binding domain (PF02882) [0.001] | D-mannose binding lectin (PF01453) [0.001]	Cytochrome P450 (IPR001128) [0.970] | Serine-threonine/tyrosine-protein kinase, catalytic domain (IPR001245) [0.002] | Carbohydrate kinase PfkB (IPR011611) [0.001] | Tetrahydrofolate dehydrogenase/cyclohydrolase, NAD(P)-binding domain (IPR020631) [0.001] | Bulb-type lectin domain (IPR001480) [0.001] | Malectin (IPR021720) [0.001]	iron ion binding (GO:0005506) [0.970] | oxidoreductase activity, acting on paired donors, with incorporation or reduction of molecular oxygen (GO:0016705) [0.970] | heme binding (GO:0020037) [0.970] | protein kinase activity (GO:0004672) [0.002] | methylenetetrahydrofolate dehydrogenase (NADP+) activity (GO:0004488) [0.001] | catalytic activity (GO:0003824) [0.001]	oxidation-reduction process (GO:0055114) [0.970] | protein phosphorylation (GO:0006468) [0.002] | folic acid-containing compound biosynthetic process (GO:0009396) [0.001]	NULL / Representative annotation below 0.1%
OG34	30	24	35	45	43	54	32	36	38	37	33	24	28	31	21	28	22	47	44	42	25	10	50	49	13	5	60	16	27	40	39	85	137	249	284	335	nodulin MtN21 /EamA-like transporter family protein [0.953] | Nodulin MtN21 /EamA-like transporter family protein [0.045] | 4-diphosphocytidyl-2-C-methyl-D-erythritol kinase [0.001] | Zinc finger, RING-type;Transcription factor jumonji/aspartyl beta-hydroxylase [0.001]	nodulin MtN21 /EamA-like transporter family protein | Nodulin MtN21 /EamA-like transporter family protein | Walls Are Thin 1	EamA-like transporter family (PF00892) [0.928] | O-methyltransferase (PF01596) [0.001] | C2H2-type zinc finger (PF13912) [0.001] | NAC domain (PF01849) [0.001] | AP2 domain (PF00847) [0.001]	EamA domain (IPR000620) [0.928] | Nascent polypeptide-associated complex NAC domain (IPR002715) [0.001] | O-methyltransferase, family 3 (IPR002935) [0.001] | AP2/ERF domain (IPR001471) [0.001]	O-methyltransferase activity (GO:0008171) [0.001] | transcription factor activity, sequence-specific DNA binding (GO:0003700) [0.001]	regulation of transcription, DNA-templated (GO:0006355) [0.001]	integral component of membrane (GO:0016021) [0.928] | membrane (GO:0016020) [0.928]
OG35	20	23	37	42	36	51	49	37	53	24	32	12	39	21	22	31	33	43	47	29	21	13	28	39	17	19	177	508	520	529	515	504	504	492	475	465	Early nodulin-like protein [0.208] | Blue copper protein [0.138] | Blue copper protein, putative [0.108] | Early nodulin 16, putative [0.059] | early nodulin-like protein 17 [0.056] | Early nodulin 20, putative [0.028] | Cupredoxin superfamily protein [0.027] | Basic blue protein [0.026] | early nodulin-like protein 14 [0.026] | Blue copper-like protein [0.026] | early nodulin-like protein 1 [0.0…	Cupredoxin superfamily protein | early nodulin-like protein 17 | early nodulin-like protein 22 | early nodulin-like protein 20 | plantacyanin | uclacyanin 1 | uclacyanin 3 | early nodulin-like protein 16 | early nodulin-like protein 19 | plastocyanin-like domain-containing protein | uclacyanin 2 | blue-copper-binding protein	Plastocyanin-like domain (PF02298) [0.980]	Phytocyanin domain (IPR003245) [0.980]	electron carrier activity (GO:0009055) [0.980]	NULL / Representative annotation below 0.1%	NULL / Representative annotation below 0.1%
OG36	4	8	39	15	10	38	9	8	46	20	20	7	8	15	12	30	12	17	14	14	26	7	30	356	39	7	1	47	39	35	123	1866	1376	1384	1384	1401	Leucine-rich repeat receptor-like protein kinase family protein [0.464] | Leucine-rich receptor-like protein kinase family protein [0.210] | Leucine-rich repeat receptor-like protein kinase [0.076] | Leucine-rich repeat protein kinase family protein [0.070] | Leucine-rich repeat protein [0.051] | Receptor-like protein kinase [0.022] | Leucine-rich repeat family protein [0.016] | Leucine-rich repe…	Leucine-rich repeat (LRR) family protein | Ribonuclease inhibitor	Leucine rich repeat (PF13855) [0.433] | Leucine rich repeat N-terminal domain (PF08263) [0.359] | Leucine Rich Repeat (PF00560) [0.265] | Leucine Rich repeats (2 copies) (PF12799) [0.042] | Leucine Rich repeat (PF13516) [0.023] | Protein kinase domain (PF00069) [0.012] | Protein tyrosine kinase (PF07714) [0.009] | Chitinase class I (PF00182) [0.001] | Zinc-binding (PF12907) [0.001] | POT family (…	Leucine-rich repeat (IPR001611) [0.584] | Leucine-rich repeat-containing N-terminal, plant-type (IPR013210) [0.359] | Leucine rich repeat 4 (IPR025875) [0.042] | Protein kinase domain (IPR000719) [0.012] | Serine-threonine/tyrosine-protein kinase, catalytic domain (IPR001245) [0.009] | Domain of unknown function DUF569 (IPR007679) [0.001] | Nucleotidyl transferase domain (IPR005835) [0.001] | Unc…	protein binding (GO:0005515) [0.584] | protein kinase activity (GO:0004672) [0.020] | ATP binding (GO:0005524) [0.012] | transporter activity (GO:0005215) [0.001] | chitinase activity (GO:0004568) [0.001] | nucleotidyltransferase activity (GO:0016779) [0.001]	protein phosphorylation (GO:0006468) [0.020] | cell wall macromolecule catabolic process (GO:0016998) [0.001] | chitin catabolic process (GO:0006032) [0.001] | biosynthetic process (GO:0009058) [0.001] | transport (GO:0006810) [0.001]	membrane (GO:0016020) [0.001]
OG37	6	9	20	66	25	60	60	29	57	21	28	7	18	10	25	11	46	33	21	9	20	17	59	65	78	10	157	452	21	25	30	22	1377	1385	1385	SINGLETON	UDP-Glycosyltransferase superfamily protein [0.715] | UDP-glycosyltransferase 1 [0.091] | UDP-glycosyltransferase [0.046] | Cytokinin-O-glucosyltransferase [0.027] | UDP-glycosyltransferase 85A2 [0.023] | UDP-glycosyltransferase UGT709A10 [0.012] | Glycosyltransferase [0.011] | UDP-glucuronosyltransferase, putative [0.010] | UDP-glucuronosyltransferase [0.009] | UDP-glucosyltransferase family 1 p…	UDP-glucosyl transferase 85A4 | UDP-glucosyl transferase 85A3 | UDP-glucosyl transferase 85A7 | UDP-glucosyl transferase 85A5 | UDP-glucosyl transferase 85A2 | UDP-Glycosyltransferase superfamily protein	UDP-glucoronosyl and UDP-glucosyl transferase (PF00201) [0.772] | PPR repeat (PF01535) [0.002] | Actin (PF00022) [0.001] | Aminotransferase class-V (PF00266) [0.001] | SAM dependent carboxyl methyltransferase (PF03492) [0.001] | O-methyltransferase (PF00891) [0.001] | PLAC8 family (PF04749) [0.001]	UDP-glucuronosyl/UDP-glucosyltransferase (IPR002213) [0.772] | Pentatricopeptide repeat (IPR002885) [0.002] | Aminotransferase class V domain (IPR000192) [0.001] | SAM dependent carboxyl methyltransferase (IPR005299) [0.001] | Actin family (IPR004000) [0.001] | O-methyltransferase, family 2 (IPR001077) [0.001] | PLAC8 motif-containing protein (IPR006461) [0.001]	transferase activity, transferring hexosyl groups (GO:0016758) [0.772] | O-methyltransferase activity (GO:0008171) [0.001] | methyltransferase activity (GO:0008168) [0.001]	metabolic process (GO:0008152) [0.772]	NULL / Representative annotation below 0.1%
OG38	36	20	24	26	41	42	25	45	44	22	33	41	28	31	22	36	22	32	30	73	40	25	17	15	15	19	126	682	750	775	809	806	1067	1481	1491	1514	Dof zinc finger protein [0.675] | Zinc finger protein, putative [0.118] | Dof-type zinc finger DNA-binding family protein [0.058] | DOF zinc finger protein 1 [0.019] | Dof-type zinc finger protein [0.017] | Dof domain, zinc finger family protein, expressed [0.014] | Dof zinc finger protein-like protein [0.012] | DOF zinc finger protein 2 [0.010] | Dof-type zinc finger domain-containing protein [0…	Dof-type zinc finger DNA-binding family protein | Dof-type zinc finger domain-containing protein | TARGET OF MONOPTEROS 6 | DNA binding with one finger 4.7 | DOF zinc finger protein 1 | cycling DOF factor 2 | OBF binding protein 4 | DNA binding with one finger 2.4 | OBF binding protein 1 | DOF zinc finger protein 2 | cycling DOF factor 3 | cycling DOF factor 1 | OBF-binding protein 3	Dof domain, zinc finger (PF02701) [0.990] | Cupin (PF00190) [0.001]	Zinc finger, Dof-type (IPR003851) [0.990] | Cupin 1 (IPR006045) [0.001]	DNA binding (GO:0003677) [0.990] | nutrient reservoir activity (GO:0045735) [0.001]	regulation of transcription, DNA-templated (GO:0006355) [0.990]	NULL / Representative annotation below 0.1%
OG39	29	24	33	72	29	27	35	36	48	71	36	1	33	21	11	14	50	35	30	50	13	11	18	54	2	0	1	28	45	45	40	34	1414	1023	584	375	Terpene synthase [0.148] | Sesquiterpene synthase [0.112] | Terpene synthase/cyclase family protein [0.046] | (-)-germacrene D synthase [0.037] | Myrcene synthase, chloroplastic [0.029] | Isoprene synthase [0.026] | Geraniol synthase [0.024] | Valencene synthase [0.023] | (-)-alpha-pinene synthase [0.023] | Monoterpene synthase [0.020] | Pinene synthase [0.019] | Farnesene synthase [0.019] | Sesq…	Terpenoid cyclases/Protein prenyltransferases superfamily protein | terpene synthase-like sequence-1,8-cineole | terpene synthase 21 | terpene synthase 02 | terpenoid synthase 13 | terpenoid synthase 12 | terpene synthase 1 | terpene synthase 10 | terpene synthase 03	Terpene synthase family, metal binding domain (PF03936) [0.853] | Terpene synthase, N-terminal domain (PF01397) [0.802] | Cellulose synthase (PF03552) [0.001] | GAG-pre-integrase domain (PF13976) [0.001] | gag-polypeptide of LTR copia-type (PF14223) [0.001]	Terpene synthase, metal-binding domain (IPR005630) [0.853] | Terpene synthase, N-terminal domain (IPR001906) [0.802] | Cellulose synthase (IPR005150) [0.001] | GAG-pre-integrase domain (IPR025724) [0.001]	lyase activity (GO:0016829) [0.964] | terpene synthase activity (GO:0010333) [0.964] | magnesium ion binding (GO:0000287) [0.853] | cellulose synthase (UDP-forming) activity (GO:0016760) [0.001]	metabolic process (GO:0008152) [0.802] | cellulose biosynthetic process (GO:0030244) [0.001]	membrane (GO:0016020) [0.001]
OG40	24	3	35	157	18	42	64	39	111	10	10	6	13	4	17	12	30	33	10	12	29	17	34	13	0	0	81	53	55	55	47	41	34	30	756	750	ATP synthase subunit beta [0.001]	Plant protein of unknown function (DUF247) | Plant protein of unknown function	Plant protein of unknown function (PF03140) [0.996]	Protein of unknown function DUF247, plant (IPR004158) [0.996]	NULL / Representative annotation below 0.1%	NULL / Representative annotation below 0.1%	NULL / Representative annotation below 0.1%
OG41	19	6	30	60	2	83	48	12	14	2	25	1	7	5	29	4	167	82	50	15	39	4	0	0	1	0	122	82	48	49	66	70	76	67	54	69	F-box family protein [0.218] | F-box protein [0.071] | F-box domain containing protein, expressed [0.067] | F-box domain containing protein [0.030] | F-box protein SKIP23 [0.023] | F-box domain containing protein,putative,expressed [0.018] | Cyclin-like F-box [0.006] | F-box domain, putative [0.006] | F-box protein family-like [0.001] | RNA binding protein [0.001] | S-adenosyl-L-methionine-depend…	F-box family protein with a domain of unknown function (DUF295) | Protein of unknown function (DUF295) | ascorbic acid mannose pathway regulator 1 | F-box family protein	Protein of unknown function (DUF295) (PF03478) [0.797] | F-box domain (PF00646) [0.241] | F-box-like (PF12937) [0.050] | Arabidopsis phospholipase-like protein (PEARLI 4) (PF05278) [0.004] | Reverse transcriptase-like (PF13456) [0.001] | gag-polypeptide of LTR copia-type (PF14223) [0.001] | hAT family C-terminal dimerisation region (PF05699) [0.001] | zinc-binding in reverse transcriptase (PF1396…	Domain unknown function DUF295 (IPR005174) [0.797] | F-box domain (IPR001810) [0.291] | Phospholipase-like (IPR007942) [0.004] | Reverse transcriptase zinc-binding domain (IPR026960) [0.001] | Zinc finger, BED-type (IPR003656) [0.001] | Cysteine-rich transmembrane CYSTM domain (IPR028144) [0.001] | Toll/interleukin-1 receptor homology (TIR) domain (IPR000157) [0.001] | Zinc finger, SWIM-type (IPR…	protein binding (GO:0005515) [0.292] | zinc ion binding (GO:0008270) [0.003] | nucleic acid binding (GO:0003676) [0.003] | DNA binding (GO:0003677) [0.001] | protein dimerization activity (GO:0046983) [0.001]	cell redox homeostasis (GO:0045454) [0.001] | oxidation-reduction process (GO:0055114) [0.001] | signal transduction (GO:0007165) [0.001]	NULL / Representative annotation below 0.1%
OG42	4	44	33	4	21	168	18	16	153	0	46	0	1	9	22	0	101	0	1	2	11	0	6	34	0	5	1	15	13	24	1008	607	603	759	757	751	zinc ion binding;nucleic acid binding [0.253] | Zinc knuckle (CCHC-type) family protein [0.097] | LINE-type retrotransposon LIb DNA, complete sequence, Insertion at the S10 site [0.056] | IMP dehydrogenase/GMP reductase, related [0.050] | Zinc finger, CCHC-type [0.046] | LINE-type retrotransposon LIb DNA, complete sequence, Insertion at the S14 site [0.044] | Non-LTR retrolelement reverse transcr…	Zinc knuckle (CCHC-type) family protein | zinc ion binding;nucleic acid binding	Domain of unknown function (DUF4283) (PF14111) [0.615] | Zinc knuckle (PF14392) [0.160] | Ubiquitin family (PF00240) [0.010] | Reverse transcriptase-like (PF13456) [0.007] | Endonuclease/Exonuclease/phosphatase family (PF03372) [0.007] | Zinc knuckle (PF00098) [0.004] | tRNA synthetases class I (M) (PF09334) [0.001] | NB-ARC domain (PF00931) [0.001] | Protein of unknown function (DUF674) (PF05056…	Domain of unknown function DUF4283 (IPR025558) [0.615] | Zinc knuckle CX2CX4HX4C (IPR025836) [0.160] | Ubiquitin domain (IPR000626) [0.010] | Endonuclease/exonuclease/phosphatase (IPR005135) [0.007] | Zinc finger, CCHC-type (IPR001878) [0.004] | Formin, FH2 domain (IPR015425) [0.001] | Reverse transcriptase zinc-binding domain (IPR026960) [0.001] | Methionyl/Leucyl tRNA synthetase (IPR015413) [0.…	protein binding (GO:0005515) [0.010] | nucleic acid binding (GO:0003676) [0.006] | zinc ion binding (GO:0008270) [0.004] | ATP binding (GO:0005524) [0.001] | nucleotide binding (GO:0000166) [0.001] | ADP binding (GO:0043531) [0.001] | metalloendopeptidase activity (GO:0004222) [0.001] | oxidoreductase activity (GO:0016491) [0.001] | aminoacyl-tRNA ligase activity (GO:0004812) [0.001] | GTPase act…	tRNA aminoacylation for protein translation (GO:0006418) [0.001] | proteolysis (GO:0006508) [0.001] | oxidation-reduction process (GO:0055114) [0.001]	NULL / Representative annotation below 0.1%
OG43	3	2	2	2	3	4	3	4	4	2	2	3	3	2	2	8	2	3	2	5	619	2	2	1	1	7	14	39	63	106	103	120	128	119	115	136	60S ribosomal protein L27a, putative [0.727] | 60S ribosomal protein L27A [0.149] | 60S ribosomal protein L27a [0.120] | alpha/beta-Hydrolases superfamily protein [0.001] | 60S ribosomal protein L27a-3 [0.001] | 60s ribosomal protein l27a [0.001]	Ribosomal protein L18e/L15 superfamily protein	Ribosomal proteins 50S-L15, 50S-L18e, 60S-L27A (PF00828) [0.113] | Alpha/beta hydrolase family (PF12697) [0.001] | Universal stress protein family (PF00582) [0.001]	Ribosomal protein L18e/L15P (IPR021131) [0.113] | Alpha/beta hydrolase fold-1 (IPR000073) [0.001] | UspA (IPR006016) [0.001]	NULL / Representative annotation below 0.1%	response to stress (GO:0006950) [0.001]	NULL / Representative annotation below 0.1%
OG44	29	18	20	29	31	41	22	38	36	23	25	23	23	27	15	27	13	33	32	50	36	12	12	48	10	19	28	24	58	31	42	50	1415	1432	1436	1457	WRKY transcription factor [0.092] | WRKY transcription factor, putative [0.090] | WRKY DNA binding protein [0.087] | WRKY DNA-binding protein [0.072] | WRKY DNA-binding protein 28 [0.051] | WRKY DNA-binding protein 57 [0.049] | WRKY DNA-binding protein 55 [0.042] | WRKY-like DNA-binding protein [0.042] | WRKY DNA-binding protein 49 [0.039] | WRKY DNA-binding protein 9 [0.033] | WRKY DNA-binding p…	WRKY family transcription factor | WRKY DNA-binding protein 38 | WRKY DNA-binding protein 9 | WRKY DNA-binding protein 28 | WRKY DNA-binding protein 67 | WRKY DNA-binding protein 66 | WRKY DNA-binding protein 75 | WRKY DNA-binding protein 71 | WRKY DNA-binding protein 49 | WRKY DNA-binding protein 57 | WRKY DNA-binding protein 24 | WRKY DNA-binding protein 13 | WRKY DNA-binding protein 48 | WRKY …	WRKY DNA -binding domain (PF03106) [0.993]	WRKY domain (IPR003657) [0.993]	sequence-specific DNA binding (GO:0043565) [0.993] | transcription factor activity, sequence-specific DNA binding (GO:0003700) [0.993]	regulation of transcription, DNA-templated (GO:0006355) [0.993]	NULL / Representative annotation below 0.1%
OG45	1	14	432	3	1	10	20	31	23	0	17	0	2	16	10	3	18	10	0	0	14	15	12	28	0	0	1	1	1	38	23	17	12	11	9	7	Polynucleotidyl transferase, ribonuclease H-like superfamily protein [0.287] | Ribonuclease H [0.238] | Ribonuclease H-like superfamily protein [0.101] | RNA-directed DNA polymerase (reverse transcriptase)-related family protein [0.028] | RNA-directed DNA polymerase (Reverse transcriptase) [0.018] | RNA-directed DNA polymerase (Reverse transcriptase); Polynucleotidyl transferase, Ribonuclease H f…	Polynucleotidyl transferase, ribonuclease H-like superfamily protein	Reverse transcriptase-like (PF13456) [0.507] | zinc-binding in reverse transcriptase (PF13966) [0.119] | Reverse transcriptase (RNA-dependent DNA polymerase) (PF00078) [0.028] | RNA recognition motif. (a.k.a. RRM, RBD, or RNP domain) (PF00076) [0.010] | Domain of unknown function (DUF4283) (PF14111) [0.006] | Protein of unknown function (DUF789) (PF05623) [0.001] | Lipoxygenase (PF00305) [0.001] …	Reverse transcriptase zinc-binding domain (IPR026960) [0.119] | Reverse transcriptase domain (IPR000477) [0.028] | RNA recognition motif domain (IPR000504) [0.010] | Domain of unknown function DUF4283 (IPR025558) [0.006] | Lipoxygenase, C-terminal (IPR013819) [0.001] | Phloem protein 2-like (IPR025886) [0.001] | Domain of unknown function DUF659 (IPR007021) [0.001] | F-box associated domain, type…	nucleic acid binding (GO:0003676) [0.012] | oxidoreductase activity, acting on paired donors, with incorporation or reduction of molecular oxygen (GO:0016705) [0.001] | oxidoreductase activity, acting on single donors with incorporation of molecular oxygen, incorporation of two atoms of oxygen (GO:0016702) [0.001] | RNA-DNA hybrid ribonuclease activity (GO:0004523) [0.001] | protein binding (GO:0…	oxidation-reduction process (GO:0055114) [0.003] | translation (GO:0006412) [0.001] | DNA integration (GO:0015074) [0.001] | protein phosphorylation (GO:0006468) [0.001]	intracellular (GO:0005622) [0.001] | ribosome (GO:0005840) [0.001] | integral component of membrane (GO:0016021) [0.001]
OG46	28	21	23	81	16	22	26	45	53	31	17	6	43	8	22	9	27	32	44	27	14	7	22	4	27	9	1	1	7	6	60	10	SINGLETON	SINGLETON	SINGLETON	SINGLETON	Germin-like protein [0.283] | Germin-like protein 1 [0.247] | RmlC-like cupins superfamily protein [0.169] | Germin-like protein subfamily 1 member [0.146] | Germin-like protein 8-8 [0.036] | Germin-like protein subfamily 1 member 11 [0.017] | germin-like protein 2 [0.015] | Germin-like protein 1-1 [0.012] | Germin-like protein 4 [0.011] | Oxalate oxidase 2 [0.008] | Germin-like protein 2 [0.005]…	RmlC-like cupins superfamily protein | germin-like protein 2 | germin-like protein 9 | germin-like protein 8 | germin-like protein 10 | germin-like protein subfamily 2 member 2 precursor | germin-like protein 5 | germin-like protein 6 | germin-like protein 4	Cupin (PF00190) [0.976] | bZIP transcription factor (PF00170) [0.002] | Tubulin/FtsZ family, GTPase domain (PF00091) [0.002]	Cupin 1 (IPR006045) [0.976] | Tubulin/FtsZ, GTPase domain (IPR003008) [0.002] | Basic-leucine zipper domain (IPR004827) [0.002]	nutrient reservoir activity (GO:0045735) [0.976] | sequence-specific DNA binding (GO:0043565) [0.002] | GTPase activity (GO:0003924) [0.002] | transcription factor activity, sequence-specific DNA binding (GO:0003700) [0.002]	regulation of transcription, DNA-templated (GO:0006355) [0.002]	NULL / Representative annotation below 0.1%
OG47	24	14	27	78	29	62	28	22	62	19	18	12	21	12	18	18	13	37	47	13	17	2	13	22	14	6	20	1	21	25	30	180	178	167	179	177	UDP-Glycosyltransferase superfamily protein [0.400] | UDP-glycosyltransferase [0.103] | Glycosyltransferase [0.099] | UDP-sugar:glycosyltransferase [0.094] | Anthocyanidin 5,3-O-glucosyltransferase [0.060] | UDP-glycosyltransferase 1 [0.048] | Anthocyanidin 3-O-glucosyltransferase [0.028] | UDP-glycosyltransferase UGT88C4 [0.020] | UDP-glucosyltransferase, putative [0.014] | UDP-glycosyltransfera…	UDP-Glycosyltransferase superfamily protein | UDP-glucosyl transferase 71B5 | UDP-glucosyl transferase 71D1 | UDP-glucosyl transferase 88A1 | UDP-glucosyl transferase 71C2 | UDP-glucosyl transferase 71C4 | UDP-glucosyl transferase 71B6 | UDP-glucosyl transferase 71C3 | UDP-glucosyl transferase 72E1 | UDP-glucosyl transferase 71B1 | UDP-glucosyl transferase 71C1 | UDP-glucosyl transferase 72B3 | U…	UDP-glucoronosyl and UDP-glucosyl transferase (PF00201) [0.954]	UDP-glucuronosyl/UDP-glucosyltransferase (IPR002213) [0.954]	transferase activity, transferring hexosyl groups (GO:0016758) [0.954]	metabolic process (GO:0008152) [0.954]	NULL / Representative annotation below 0.1%
OG48	0	0	0	0	0	1	0	0	0	0	0	0	0	0	0	0	0	629	2	0	0	0	0	0	0	5	1	1	203	182	157	146	184	174	165	158	Transposon protein, putative, CACTA, En/Spm sub-class [0.984] | Transposon protein, putative, CACTA, En/Spm sub-class, expressed [0.003] | Hemoglobin and hemoglobin-haptoglobin-binding protein A [0.003] | Retrotransposon protein, putative, Ty1-copia subclass [0.002] | Serine-repeat antigen [0.002] | Protein CBG18438 [0.002] | Cytochrome c-type biogenesis protein CcmE [0.002] | Ribosomal RNA small…	Unkown protein(s) / No TAIR description(s)	Ulp1 protease family, C-terminal catalytic domain (PF02902) [0.440] | Domain of unknown function (DUF4216) (PF13952) [0.009] | Domain of unknown function (DUF4218) (PF13960) [0.005] | Domain of unknown function (DUF834) (PF05754) [0.003] | Subtilase family (PF00082) [0.003] | Protein of unknown function (DUF1263) (PF06882) [0.003] | Reverse transcriptase (RNA-dependent DNA polymerase) (PF07727) […	Ulp1 protease family, C-terminal catalytic domain (IPR003653) [0.440] | Domain of unknown function DUF4216 (IPR025312) [0.009] | Domain of unknown function DUF4218 (IPR025452) [0.005] | Domain of unknown function DUF834 (IPR008552) [0.003] | Peptidase S8/S53 domain (IPR000209) [0.003] | Domain of unknown function DUF1263 (IPR010685) [0.003] | Zinc finger, CCHC-type (IPR001878) [0.002] | GAG-pre-i…	cysteine-type peptidase activity (GO:0008234) [0.440] | serine-type endopeptidase activity (GO:0004252) [0.003] | oxidoreductase activity, acting on paired donors, with incorporation or reduction of molecular oxygen (GO:0016705) [0.002] | nucleic acid binding (GO:0003676) [0.002] | iron ion binding (GO:0005506) [0.002] | ADP binding (GO:0043531) [0.002] | heme binding (GO:0020037) [0.002] | zinc …	proteolysis (GO:0006508) [0.443] | DNA integration (GO:0015074) [0.002] | oxidation-reduction process (GO:0055114) [0.002] | transmembrane transport (GO:0055085) [0.002]	integral component of membrane (GO:0016021) [0.002]
OG49	0	10	76	87	32	104	20	63	123	44	32	0	1	0	4	9	7	1	0	0	2	0	7	1	0	0	1	1	32	32	25	67	98	285	268	307	NBS/LRR resistance protein-like protein [0.228] | Cc-nbs-lrr resistance protein [0.151] | Disease resistance protein RGA2, putative [0.138] | Disease resistance protein RPS5, putative [0.103] | NB-ARC domain-containing disease resistance protein, putative [0.042] | Disease resistance protein RPS2, putative [0.037] | Disease resistance protein (CC-NBS-LRR class) family [0.030] | Disease resistance…	Unkown protein(s) / No TAIR description(s)	NB-ARC domain (PF00931) [0.642] | Leucine rich repeat (PF13855) [0.067] | WD domain, G-beta repeat (PF00400) [0.006] | Leucine Rich Repeat (PF00560) [0.003] | Domain of unknown function (DUF4219) (PF13961) [0.002] | Myb-like DNA-binding domain (PF00249) [0.002] | NAC domain (PF01849) [0.002] | Ribosomal protein S18 (PF01084) [0.002] | gag-polypeptide of LTR copia-type (PF14223) [0.002] | Cyclin, …	NB-ARC (IPR002182) [0.642] | Leucine-rich repeat (IPR001611) [0.071] | WD40 repeat (IPR001680) [0.006] | Cyclin, C-terminal domain (IPR004367) [0.002] | Nascent polypeptide-associated complex NAC domain (IPR002715) [0.002] | Domain of unknown function DUF4219 (IPR025314) [0.002] | SANT/Myb domain (IPR001005) [0.002] | Ribosomal protein S18 (IPR001648) [0.002] | Cyclin, N-terminal (IPR006671) [0.0…	ADP binding (GO:0043531) [0.642] | protein binding (GO:0005515) [0.077] | structural constituent of ribosome (GO:0003735) [0.002]	translation (GO:0006412) [0.002]	ribosome (GO:0005840) [0.002] | intracellular (GO:0005622) [0.002] | nucleus (GO:0005634) [0.002]
OG50	15	12	28	46	27	34	28	26	29	39	24	14	19	16	12	23	23	22	27	16	19	19	16	41	27	19	1	2	2	183	54	3	2	7	71	63	Pleiotropic drug resistance protein [0.290] | Pleiotropic drug resistance ABC transporter family protein [0.256] | ABC transporter family protein [0.148] | ABC transporter family pleiotropic drug resistance protein [0.119] | ABC transporter G family member [0.064] | Pleiotropic drug resistance transporter 3 [0.035] | Pleiotropic drug resistance protein 2 [0.023] | ABC transporter [0.008] | pleiot…	ABC-2 and Plant PDR ABC-type transporter family protein | pleiotropic drug resistance 1 | pleiotropic drug resistance 5 | pleiotropic drug resistance 10 | pleiotropic drug resistance 9 | pleiotropic drug resistance 3 | pleiotropic drug resistance 2 | pleiotropic drug resistance 4 | pleiotropic drug resistance 7 | pleiotropic drug resistance 13 | pleiotropic drug resistance 6 | pleiotropic drug re…	ABC transporter (PF00005) [0.957] | ABC-2 type transporter (PF01061) [0.923] | Plant PDR ABC transporter associated (PF08370) [0.845] | ABC-transporter extracellular N-terminal (PF14510) [0.731] | ATPase family associated with various cellular activities (AAA) (PF00004) [0.005] | PPR repeat family (PF13041) [0.003] | PPR repeat (PF01535) [0.003] | GAG-pre-integrase domain (PF13976) [0.002] | gag-…	ABC transporter-like (IPR003439) [0.957] | ABC-2 type transporter (IPR013525) [0.923] | Plant PDR ABC transporter associated (IPR013581) [0.845] | ABC-transporter extracellular N-terminal domain (IPR029481) [0.731] | ATPase, AAA-type, core (IPR003959) [0.005] | Pentatricopeptide repeat (IPR002885) [0.003] | DYW domain (IPR032867) [0.002] | GAG-pre-integrase domain (IPR025724) [0.002] | Zinc finge…	ATP binding (GO:0005524) [0.958] | ATPase activity (GO:0016887) [0.957] | zinc ion binding (GO:0008270) [0.005] | DNA binding (GO:0003677) [0.002] | hydrolase activity, acting on ester bonds (GO:0016788) [0.002] | protein kinase activity (GO:0004672) [0.002] | ATPase activity, coupled to transmembrane movement of substances (GO:0042626) [0.002]	intracellular protein transport (GO:0006886) [0.002] | transport (GO:0006810) [0.002] | ER to Golgi vesicle-mediated transport (GO:0006888) [0.002] | DNA integration (GO:0015074) [0.002] | protein phosphorylation (GO:0006468) [0.002]	membrane (GO:0016020) [0.923] | integral component of membrane (GO:0016021) [0.002] | COPII vesicle coat (GO:0030127) [0.002]
OG51	1	316	47	15	8	26	17	77	10	4	5	39	8	0	13	0	11	0	0	0	11	6	4	0	0	0	4	90	153	150	175	163	158	175	166	159	Retroelement pol polyprotein-like [0.100] | Receptor-like serine/threonine kinase [0.071] | Polypeptide with a gag-like domain [0.040] | SLG-Sc and SLA-Sc genes and Melmoth retrotransposon sequence [0.021] | TIR-NBS-LRR type disease resistance protein [0.019] | Gag-pol polyprotein [0.019] | Polynucleotidyl transferase, Ribonuclease H fold [0.018] | Integrase, catalytic region [0.015] | Gag polypr…	Unkown protein(s) / No TAIR description(s)	gag-polypeptide of LTR copia-type (PF14244) [0.341] | gag-polypeptide of LTR copia-type (PF14223) [0.061] | Reverse transcriptase (RNA-dependent DNA polymerase) (PF07727) [0.003] | Low molecular weight phosphotyrosine protein phosphatase (PF01451) [0.002] | Mpv17 / PMP22 family (PF04117) [0.002] | DJ-1/PfpI family (PF01965) [0.002] | Mlo family (PF03094) [0.002] | hAT family C-terminal dimerisati…	Gag-polypeptide of LTR copia-type (IPR029472) [0.341] | Reverse transcriptase, RNA-dependent DNA polymerase (IPR013103) [0.003] | HAT, C-terminal dimerisation domain (IPR008906) [0.002] | Phosphotyrosine protein phosphatase I superfamily (IPR023485) [0.002] | Mlo-related protein (IPR004326) [0.002] | Mpv17/PMP22 (IPR007248) [0.002] | DJ-1/PfpI (IPR002818) [0.002]	protein dimerization activity (GO:0046983) [0.002]	defense response (GO:0006952) [0.002]	integral component of membrane (GO:0016021) [0.003]
OG52	25	16	27	28	23	33	22	26	33	26	30	15	30	17	28	23	23	10	13	26	18	9	26	65	15	10	2	47	39	35	57	84	79	104	95	102	Xyloglucan endotransglucosylase/hydrolase family protein [0.451] | Xyloglucan endotransglucosylase/hydrolase [0.438] | xyloglucan endotransglucosylase/hydrolase 8 [0.041] | xyloglucan endotransglucosylase/hydrolase 10 [0.026] | Xyloglucan endotransglucosylase hydrolase [0.006] | Xyloglucan endotransglucosylase/hydrolase protein A, putative [0.005] | xyloglucan endotransglucosylase/hydrolase 9 [0.…	xyloglucan endotransglucosylase/hydrolase 13 | xyloglucan endotransglucosylase/hydrolase 1 | xyloglucan endotransglucosylase/hydrolase 6 | xyloglucan endotransglucosylase/hydrolase 17 | xyloglucan endotransglucosylase/hydrolase 24 | xyloglucan endotransglucosylase/hydrolase 19 | xyloglucan endotransglucosylase/hydrolase 12 | xyloglucan endotransglucosylase/hydrolase 20 | xyloglucan endotransglyco…	Glycosyl hydrolases family 16 (PF00722) [0.981] | Xyloglucan endo-transglycosylase (XET) C-terminus (PF06955) [0.927] | Dirigent-like protein (PF03018) [0.002]	Glycoside hydrolase family 16 (IPR000757) [0.981] | Xyloglucan endo-transglycosylase, C-terminal (IPR010713) [0.927] | Plant disease resistance response protein (IPR004265) [0.002]	hydrolase activity, hydrolyzing O-glycosyl compounds (GO:0004553) [0.981] | xyloglucan:xyloglucosyl transferase activity (GO:0016762) [0.927]	carbohydrate metabolic process (GO:0005975) [0.981] | cellular glucan metabolic process (GO:0006073) [0.927]	cell wall (GO:0005618) [0.927] | apoplast (GO:0048046) [0.927]
OG53	30	18	17	7	32	38	21	30	41	20	28	22	28	26	14	46	27	14	13	28	30	18	20	32	7	10	2	6	22	17	89	79	1954	1386	2051	1402	Plant invertase/pectin methylesterase inhibitor superfamily [0.553] | Pectinesterase [0.421] | Pectinesterase/pectinesterase inhibitor [0.018] | Pectinesterase (Precursor) [0.003] | Pectinesterase family protein [0.003] | Pectin methylesterase [0.002]	Plant invertase/pectin methylesterase inhibitor superfamily | pectin methylesterase PCR fragment F | pectin methylesterase 44 | Pectin lyase-like superfamily protein | pectin methylesterase 3 | pectin methylesterase 38 | pectin methylesterase 2 | pectin methylesterase 61 | methylesterase PCR A	Pectinesterase (PF01095) [0.998] | Plant invertase/pectin methylesterase inhibitor (PF04043) [0.812] | Ulp1 protease family, C-terminal catalytic domain (PF02902) [0.002] | Terpene synthase family, metal binding domain (PF03936) [0.002] | Leucine rich repeat N-terminal domain (PF08263) [0.002] | Terpene synthase, N-terminal domain (PF01397) [0.002] | Protein kinase domain (PF00069) [0.002] | Leuc…	Pectinesterase, catalytic (IPR000070) [0.998] | Pectinesterase inhibitor domain (IPR006501) [0.812] | Terpene synthase, metal-binding domain (IPR005630) [0.002] | Leucine-rich repeat (IPR001611) [0.002] | Ulp1 protease family, C-terminal catalytic domain (IPR003653) [0.002] | Terpene synthase, N-terminal domain (IPR001906) [0.002] | Protein kinase domain (IPR000719) [0.002] | Leucine-rich repeat-…	pectinesterase activity (GO:0030599) [0.998] | enzyme inhibitor activity (GO:0004857) [0.812] | terpene synthase activity (GO:0010333) [0.002] | lyase activity (GO:0016829) [0.002] | magnesium ion binding (GO:0000287) [0.002] | protein binding (GO:0005515) [0.002] | cysteine-type peptidase activity (GO:0008234) [0.002] | ATP binding (GO:0005524) [0.002] | protein kinase activity (GO:0004672) [0.0…	cell wall modification (GO:0042545) [0.998] | metabolic process (GO:0008152) [0.002] | proteolysis (GO:0006508) [0.002] | protein phosphorylation (GO:0006468) [0.002]	cell wall (GO:0005618) [0.998]
OG54	27	15	18	27	32	33	18	30	32	18	30	25	24	23	21	26	18	34	32	44	5	18	13	33	6	12	1	1	9	11	8	986	405	391	373	364	CBL-interacting protein kinase [0.575] | CBL-interacting protein kinase 12 [0.050] | CBL-interacting protein kinase 9 [0.036] | CBL-interacting protein kinase 8 [0.031] | CBL-interacting protein kinase 20 [0.029] | Protein kinase [0.029] | CBL-interacting protein kinase 09 [0.026] | CBL-interacting protein kinase 7 [0.018] | CBL-interacting protein kinase 5 [0.015] | CBL-interacting protein kinas…	CBL-interacting protein kinase 22 | CBL-interacting protein kinase 19 | CBL-interacting protein kinase 15 | CBL-interacting protein kinase 5 | CBL-interacting protein kinase 2 | SOS3-interacting protein 3 | CBL-interacting protein kinase 7 | serine/threonine protein kinase 1 | Ca2+regulated serine-threonine protein kinase family protein | CBL-interacting protein kinase 1 | CBL-interacting protein…	Protein kinase domain (PF00069) [0.992] | NAF domain (PF03822) [0.909] | Kinase associated domain 1 (PF02149) [0.023] | Protein tyrosine kinase (PF07714) [0.010] | Reverse transcriptase-like (PF13456) [0.002] | UBA/TS-N domain (PF00627) [0.002] | CAF1 family ribonuclease (PF04857) [0.002]	Protein kinase domain (IPR000719) [0.992] | NAF domain (IPR004041) [0.909] | Kinase associated domain 1 (KA1) (IPR001772) [0.023] | Serine-threonine/tyrosine-protein kinase, catalytic domain (IPR001245) [0.010] | Ribonuclease CAF1 (IPR006941) [0.002] | Ubiquitin-associated domain (IPR015940) [0.002]	protein kinase activity (GO:0004672) [0.992] | ATP binding (GO:0005524) [0.992]	protein phosphorylation (GO:0006468) [0.992] | signal transduction (GO:0007165) [0.909]	NULL / Representative annotation below 0.1%
OG55	25	19	20	27	25	31	20	32	28	19	25	22	19	19	18	19	17	32	31	34	19	9	10	53	16	6	89	1	103	209	169	205	196	189	293	281	Expansin [0.761] | Expansin protein [0.071] | Expansin-like protein [0.047] | Alpha-expansin 20 family protein [0.008] | expansin A20 [0.005] | Expansin-A16 [0.005] | Expansin-A13 [0.003] | Expansin-A31 [0.003] | expansin A17 [0.003] | Expansin-A24 [0.003] | Alpha-expansin [0.003] | Expansin-A25 [0.003] | Expansin-A23 [0.003] | Expansin-A7 [0.003] | expansin A7 [0.003] | Expansin-A29 [0.002] | Ex…	expansin A8 | Barwin-like endoglucanases superfamily protein | expansin A25 | expansin A20 | expansin A10 | expansin A1 | expansin A6 | expansin A7 | expansin A21 | expansin A4 | expansin A22 | expansin A24 | expansin A26 | expansin A14 | expansin 11 | expansin A9 | expansin A23 | expansin A17 | expansin A5 | expansin A15 | expansin A2 | expansin A18 | expansin A13 | expansin A16 | expansin 12	Pollen allergen (PF01357) [0.985] | Lytic transglycolase (PF03330) [0.971]	Expansin, cellulose-binding-like domain (IPR007117) [0.985] | RlpA-like protein, double-psi beta-barrel domain (IPR009009) [0.971]	NULL / Representative annotation below 0.1%	NULL / Representative annotation below 0.1%	NULL / Representative annotation below 0.1%
OG56	16	14	24	68	24	22	28	24	52	39	25	8	19	16	18	19	23	22	21	20	17	7	12	37	11	3	2	6	22	17	27	23	20	21	17	23	Laccase, putative [0.423] | Laccase family protein [0.275] | Laccase [0.168] | Laccase-15 [0.041] | laccase 14 [0.022] | Laccase-21 [0.020] | Laccase-25 [0.003] | Laccase-3 [0.003] | Laccase-14 [0.003] | Laccase-23 [0.003] | Laccase-6 [0.003] | Laccase-8 [0.003] | Laccase-4 [0.002] | laccase 1 [0.002] | laccase 7 [0.002] | laccase 10 [0.002] | Laccase-24 [0.002] | laccase 17 [0.002] | laccase 16 …	Laccase/Diphenol oxidase family protein | laccase 3 | laccase 14 | laccase 8 | laccase 17 | laccase 5 | laccase 16 | laccase 10 | laccase 2 | laccase 12 | laccase 1 | laccase 7 | laccase 11 | laccase 13	Multicopper oxidase (PF00394) [0.981] | Multicopper oxidase (PF07732) [0.968] | Multicopper oxidase (PF07731) [0.949] | Reverse transcriptase-like (PF13456) [0.002] | Protein of unknown function (DUF632) (PF04782) [0.002] | short chain dehydrogenase (PF00106) [0.002] | Protein tyrosine kinase (PF07714) [0.002] | Pectinesterase (PF01095) [0.002]	Multicopper oxidase, type 1 (IPR001117) [0.981] | Multicopper oxidase, type 3 (IPR011707) [0.968] | Multicopper oxidase, type 2 (IPR011706) [0.949] | Short-chain dehydrogenase/reductase SDR (IPR002347) [0.002] | Pectinesterase, catalytic (IPR000070) [0.002] | Serine-threonine/tyrosine-protein kinase, catalytic domain (IPR001245) [0.002] | Domain of unknown function DUF632 (IPR006867) [0.002]	copper ion binding (GO:0005507) [0.998] | oxidoreductase activity (GO:0016491) [0.949] | protein kinase activity (GO:0004672) [0.002] | pectinesterase activity (GO:0030599) [0.002]	oxidation-reduction process (GO:0055114) [0.985] | protein phosphorylation (GO:0006468) [0.002] | cell wall modification (GO:0042545) [0.002]	cell wall (GO:0005618) [0.002]
OG57	13	21	18	30	21	25	17	23	36	22	24	20	15	11	14	20	21	27	29	28	9	13	27	60	13	18	72	181	430	379	236	189	211	225	321	365	Potassium transporter [0.880] | Potassium transporter family protein [0.115] | Potassium transporter 5 family protein [0.003] | Potassium transporter Kup [0.002]	Potassium transporter family protein | K+ uptake transporter 3 | high affinity K+ transporter 5 | K+ uptake permease 9 | K+ uptake permease 10 | potassium transporter 1 | potassium transporter 2 | K+ uptake permease 5 | K+ uptake permease 11 | K+ uptake permease 7 | K+ uptake permease 6	K+ potassium transporter (PF02705) [0.984] | Protein kinase domain (PF00069) [0.002] | FKBP-type peptidyl-prolyl cis-trans isomerase (PF00254) [0.002] | KNOX2 domain (PF03791) [0.002]	Potassium transporter (IPR003855) [0.984] | FKBP-type peptidyl-prolyl cis-trans isomerase domain (IPR001179) [0.002] | KNOX2 (IPR005541) [0.002] | Protein kinase domain (IPR000719) [0.002]	potassium ion transmembrane transporter activity (GO:0015079) [0.984] | ATP binding (GO:0005524) [0.002] | protein kinase activity (GO:0004672) [0.002] | DNA binding (GO:0003677) [0.002]	potassium ion transmembrane transport (GO:0071805) [0.984] | protein phosphorylation (GO:0006468) [0.002]	membrane (GO:0016020) [0.984] | nucleus (GO:0005634) [0.002]
OG58	26	12	19	35	24	34	18	21	30	27	23	12	18	29	15	18	29	20	32	25	18	10	15	29	17	12	11	168	173	154	127	125	117	108	92	84	Serine carboxypeptidase, putative [0.525] | Serine carboxypeptidase-like protein [0.335] | Serine carboxypeptidase S10 family protein [0.023] | Serine carboxypeptidase [0.023] | Serine carboxypeptidase-like enzyme [0.023] | serine carboxypeptidase-like 33 [0.016] | Serine carboxypeptidase-like 35 [0.007] | Serine carboxypeptidase-like 33 [0.005] | Serine carboxypeptidase family protein [0.004] | …	alpha/beta-Hydrolases superfamily protein | serine carboxypeptidase-like 41 | serine carboxypeptidase-like 31 | serine carboxypeptidase-like 29 | serine carboxypeptidase-like 42 | serine carboxypeptidase-like 25 | serine carboxypeptidase-like 33 | serine carboxypeptidase-like 30 | serine carboxypeptidase-like 34 | serine carboxypeptidase-like 39 | serine carboxypeptidase-like 44 | serine carboxyp…	Serine carboxypeptidase (PF00450) [1.000]	Peptidase S10, serine carboxypeptidase (IPR001563) [1.000]	serine-type carboxypeptidase activity (GO:0004185) [1.000]	proteolysis (GO:0006508) [1.000]	NULL / Representative annotation below 0.1%
OG59	54	10	19	39	30	35	25	15	27	23	8	3	12	6	4	15	4	44	15	33	11	72	16	24	0	14	1	1	1	1	428	338	338	331	322	308	Leucine-rich repeat protein kinase family protein [0.898] | Leucine-rich repeat protein kinase [0.056] | Leucine-rich repeat protein kinase-like [0.009] | Leucine-rich repeat transmembrane protein kinase protein [0.007] | Leucine-rich repeat receptor-like protein kinase [0.005] | protein kinase-related [0.005] | Leucine-rich repeat family protein / protein kinase family protein [0.004] | Kinase, …	Leucine-rich repeat protein kinase family protein | Leucine-rich repeat transmembrane protein kinase protein | protein kinase-related | Protein kinase superfamily protein | root hair specific 6 | protein kinase family protein | FLG22-induced receptor-like kinase 1 | receptor protein kinase-related | root hair specific 16 | Interleukin-1 receptor-associated kinase 4 protein	Carbohydrate-binding protein of the ER (PF12819) [0.923] | Protein tyrosine kinase (PF07714) [0.541] | Leucine rich repeat (PF13855) [0.355] | Protein kinase domain (PF00069) [0.179] | Leucine Rich repeats (2 copies) (PF12799) [0.041] | Leucine Rich Repeat (PF00560) [0.032] | Leucine rich repeat N-terminal domain (PF08263) [0.011] | Myo-inositol oxygenase (PF05153) [0.004] | MCM2/3/5 family (PF00…	Malectin-like carbohydrate-binding domain (IPR024788) [0.923] | Serine-threonine/tyrosine-protein kinase, catalytic domain (IPR001245) [0.541] | Leucine-rich repeat (IPR001611) [0.387] | Protein kinase domain (IPR000719) [0.179] | Leucine rich repeat 4 (IPR025875) [0.041] | Leucine-rich repeat-containing N-terminal, plant-type (IPR013210) [0.011] | Inositol oxygenase (IPR007828) [0.004] | MCM dom…	protein kinase activity (GO:0004672) [0.706] | protein binding (GO:0005515) [0.387] | ATP binding (GO:0005524) [0.181] | iron ion binding (GO:0005506) [0.004] | inositol oxygenase activity (GO:0050113) [0.004] | DNA binding (GO:0003677) [0.002] | hydrolase activity (GO:0016787) [0.002]	protein phosphorylation (GO:0006468) [0.706] | oxidation-reduction process (GO:0055114) [0.004] | inositol catabolic process (GO:0019310) [0.004] | metabolic process (GO:0008152) [0.002] | DNA replication (GO:0006260) [0.002]	cytoplasm (GO:0005737) [0.004]
OG60	14	13	24	31	25	31	16	15	21	12	20	13	25	18	16	12	19	32	30	21	18	20	54	20	21	10	80	387	364	350	337	316	311	304	285	274	Disease resistance-responsive (dirigent-like protein) family protein [0.771] | Dirigent-like protein [0.165] | Disease resistance response protein [0.018] | Dirigent-like protein, expressed [0.016] | Disease resistance response protein-like [0.007] | Disease resistance response protein, putative [0.004] | Dirigent protein, putative, expressed [0.002] | cDNA clone:006-302-A08, full insert sequence…	Disease resistance-responsive (dirigent-like protein) family protein	Dirigent-like protein (PF03018) [0.985] | Ribosomal protein L21e (PF01157) [0.002]	Plant disease resistance response protein (IPR004265) [0.955] | Dirigent protein (IPR004265) [0.031] | Ribosomal protein L21e (IPR001147) [0.002]	structural constituent of ribosome (GO:0003735) [0.002]	translation (GO:0006412) [0.002]	intracellular (GO:0005622) [0.002] | ribosome (GO:0005840) [0.002]
OG61	27	23	35	32	40	35	40	19	77	19	37	5	27	14	16	11	19	20	17	9	0	3	8	14	0	2	1	1	1	1	2	1	1	1	1	11	FAD-binding Berberine family protein [0.993] | Serine/threonine-protein kinase [0.002] | Subtilase family protein [0.002] | Suppressor of tumorigenicity 7 protein [0.002] | FAD binding oxidoreductase, putative [0.002]	FAD-binding Berberine family protein	Berberine and berberine like (PF08031) [0.878] | FAD binding domain (PF01565) [0.869] | Oestrogen receptor (PF02159) [0.002] | S-locus glycoprotein domain (PF00954) [0.002] | Protein tyrosine kinase (PF07714) [0.002] | Subtilase family (PF00082) [0.002] | bHLH-MYC and R2R3-MYB transcription factors N-terminal (PF14215) [0.002] | PAN-like domain (PF08276) [0.002] | D-mannose binding lectin (PF0145…	Berberine/berberine-like (IPR012951) [0.878] | FAD linked oxidase, N-terminal (IPR006094) [0.869] | Peptidase S8/S53 domain (IPR000209) [0.002] | PAN/Apple domain (IPR003609) [0.002] | Bulb-type lectin domain (IPR001480) [0.002] | Oestrogen receptor (IPR001292) [0.002] | Transcription factor MYC/MYB N-terminal (IPR025610) [0.002] | Serine-threonine/tyrosine-protein kinase, catalytic domain (IPR00…	flavin adenine dinucleotide binding (GO:0050660) [0.951] | oxidoreductase activity (GO:0016491) [0.951] | steroid binding (GO:0005496) [0.002] | estrogen receptor activity (GO:0030284) [0.002] | protein kinase activity (GO:0004672) [0.002] | serine-type endopeptidase activity (GO:0004252) [0.002] | DNA binding (GO:0003677) [0.002]	oxidation-reduction process (GO:0055114) [0.951] | protein phosphorylation (GO:0006468) [0.002] | regulation of transcription, DNA-templated (GO:0006355) [0.002] | steroid hormone mediated signaling pathway (GO:0043401) [0.002] | recognition of pollen (GO:0048544) [0.002] | proteolysis (GO:0006508) [0.002]	nucleus (GO:0005634) [0.002]
OG62	8	11	45	55	32	42	57	30	71	94	12	3	12	7	14	21	11	0	0	1	13	0	9	0	0	0	35	86	350	300	1289	1339	1378	1387	1386	1403	Ankyrin repeat-containing protein, putative [0.504] | Ankyrin repeat family protein [0.321] | Ankyrin repeat-containing protein [0.117] | Ankyrin repeat family protein, putative isoform 1 [0.016] | Ankyrin-repeat containing protein [0.015] | Ankyrin repeat containing protein [0.007] | Ankyrin repeat domain-containing protein [0.005] | Inversin [0.002] | Ankyrin repeat family protein, putative [0.…	Ankyrin repeat family protein | Ankyrin-repeat containing protein	Domain of unknown function (PF13962) [0.766] | Ankyrin repeats (3 copies) (PF12796) [0.442] | Domain of unknown function (DUF4219) (PF13961) [0.062] | Ankyrin repeats (many copies) (PF13637) [0.027] | gag-polypeptide of LTR copia-type (PF14223) [0.007] | Ankyrin repeats (many copies) (PF13857) [0.005] | gag-polypeptide of LTR copia-type (PF14244) [0.005] | Ankyrin repeat (PF13606) [0.004] | Sec61…	PGG domain (IPR026961) [0.766] | Ankyrin repeat-containing domain (IPR020683) [0.442] | Domain of unknown function DUF4219 (IPR025314) [0.062] | Ankyrin repeat (IPR002110) [0.005] | Gag-polypeptide of LTR copia-type (IPR029472) [0.005] | Protein transport protein SecG/Sec61-beta/Sbh (IPR016482) [0.002]	protein binding (GO:0005515) [0.005]	NULL / Representative annotation below 0.1%	NULL / Representative annotation below 0.1%
OG63	23	7	8	27	66	74	52	19	19	4	13	18	120	38	3	10	19	0	0	0	1	0	1	0	2	7	37	570	174	156	1009	1021	1030	1024	1021	1021	Plant self-incompatibility protein S1 family [0.917] | Self-incompatibility protein [0.070] | S1 self-incompatibility protein [0.008] | Rho guanine nucleotide exchange factor 28 [0.002] | self-incompatibility protein-related [0.002] | Mitochondrial import inner membrane translocase subunit Tim9 [0.002]	Plant self-incompatibility protein S1 family | S-protein homologue 1 | self-incompatibility protein-related	Plant self-incompatibility protein S1 (PF05938) [0.994]	Plant self-incompatibility S1 (IPR010264) [0.923]	NULL / Representative annotation below 0.1%	NULL / Representative annotation below 0.1%	NULL / Representative annotation below 0.1%
OG64	12	10	10	13	8	7	8	6	47	10	60	7	7	16	14	8	1	21	2	24	23	4	169	39	0	2	29	38	26	23	24	24	21	19	15	12	hAT transposon superfamily [0.572] | hAT transposon superfamily protein [0.252] | HAT family dimerisation domain containing protein [0.021] | DNA binding protein, putative [0.017] | DNA binding protein [0.011] | Calmodulin-binding protein [0.009] | HAT family dimerization domain containing protein [0.006] | hAT dimerisation domain-containing protein / transposase-related [0.004] | Pumilio-like pr…	hAT transposon superfamily protein | hAT transposon superfamily | DNA binding | hAT dimerisation domain-containing protein / transposase-related | hAT dimerisation domain-containing protein	Protein of unknown function (DUF 659) (PF04937) [0.538] | hAT family C-terminal dimerisation region (PF05699) [0.203] | BED zinc finger (PF02892) [0.191] | Calmodulin binding protein-like (PF07887) [0.015] | Pumilio-family RNA binding repeat (PF00806) [0.004] | Acyl-coenzyme A oxidase N-terminal (PF14749) [0.002] | Serpin (serine protease inhibitor) (PF00079) [0.002] | Reverse transcriptase-like …	Domain of unknown function DUF659 (IPR007021) [0.538] | HAT, C-terminal dimerisation domain (IPR008906) [0.203] | Zinc finger, BED-type (IPR003656) [0.191] | CALMODULIN-BINDING PROTEIN60 (IPR012416) [0.015] | Pumilio RNA-binding repeat (IPR001313) [0.004] | Glycoside hydrolase family 1 (IPR001360) [0.002] | Adenylate cyclase-associated CAP, N-terminal (IPR013992) [0.002] | Cytochrome P450 (IPR001…	protein dimerization activity (GO:0046983) [0.203] | DNA binding (GO:0003677) [0.191] | calmodulin binding (GO:0005516) [0.015] | RNA binding (GO:0003723) [0.004] | heme binding (GO:0020037) [0.002] | actin binding (GO:0003779) [0.002] | oxidoreductase activity, acting on paired donors, with incorporation or reduction of molecular oxygen (GO:0016705) [0.002] | iron ion binding (GO:0005506) [0.002…	response to stress (GO:0006950) [0.015] | carbohydrate metabolic process (GO:0005975) [0.002] | cytoskeleton organization (GO:0007010) [0.002] | oxidation-reduction process (GO:0055114) [0.002]	NULL / Representative annotation below 0.1%
OG65	25	16	17	18	23	33	14	26	29	13	23	25	20	28	13	25	22	19	22	37	23	17	15	9	7	8	11	182	154	135	124	124	115	105	110	103	GATA transcription factor [0.528] | GATA transcription factor, putative [0.362] | GATA transcription factor 20 [0.015] | GATA domain class transcription factor [0.009] | GATA transcription factor 13 [0.009] | GATA transcription factor 16 [0.006] | GATA transcription factor 11 [0.006] | GATA transcription factor 19 [0.006] | GATA transcription factor 9 [0.006] | GATA transcription factor 22 [0.006…	GATA type zinc finger transcription factor family protein | GATA transcription factor 4 | GATA transcription factor 14 | GATA transcription factor 9 | GATA transcription factor 3 | GATA transcription factor 16 | GATA transcription factor 15 | GATA transcription factor 17 | GATA transcription factor 7 | GATA transcription factor 11 | GATA transcription factor 19 | GATA transcription factor 6 | GAT…	GATA zinc finger (PF00320) [0.977] | CCT motif (PF06203) [0.004] | tify domain (PF06200) [0.002]	Zinc finger, GATA-type (IPR000679) [0.977] | CCT domain (IPR010402) [0.004] | Tify domain (IPR010399) [0.002]	sequence-specific DNA binding (GO:0043565) [0.977] | transcription factor activity, sequence-specific DNA binding (GO:0003700) [0.977] | zinc ion binding (GO:0008270) [0.977] | protein binding (GO:0005515) [0.004]	regulation of transcription, DNA-templated (GO:0006355) [0.977]	NULL / Representative annotation below 0.1%
OG66	25	17	16	19	22	21	16	24	28	10	25	22	22	23	15	19	15	17	20	38	27	15	13	26	7	12	21	2	2	27	6	44	54	153	150	187	Rab family GTPase [0.177] | RAB GTPase homolog A1F [0.156] | RAB GTPase homolog A2B [0.099] | RAB GTPase homolog A4D [0.076] | RAB GTPase homolog A4A [0.072] | RAB GTPase homolog A5A [0.060] | Ras-related protein Rab-11A [0.045] | RAB GTPase homolog A5D [0.045] | RAB GTPase homolog A5E [0.039] | Ras-related protein Rab-11B [0.035] | RAB GTPase homolog A4C [0.033] | RAB GTPase homolog A3 [0.027] |…	Ras-related small GTP-binding family protein | RAB GTPase homolog A1I | RAB GTPase homolog A2D | RAB GTPase homolog A4C | RAB GTPase homolog A1F | RAB GTPase homolog A5A | RAB GTPase homolog A4B | RAB GTPase homolog A5D | RAB GTPase homolog A1C | P-loop containing nucleoside triphosphate hydrolases superfamily protein | RAB GTPase homolog A5B | RAB GTPase homolog A6B | RAB GTPase homolog A5E | RA…	Ras family (PF00071) [1.000] | Ras of Complex, Roc, domain of DAPkinase (PF08477) [0.002] | Membrane transport protein (PF03547) [0.002]	Small GTPase superfamily (IPR001806) [1.000] | Mitochondrial Rho-like (IPR013684) [0.002] | Membrane transport protein (IPR004776) [0.002]	GTP binding (GO:0005525) [1.000] | GTPase activity (GO:0003924) [1.000]	small GTPase mediated signal transduction (GO:0007264) [0.002] | transmembrane transport (GO:0055085) [0.002]	integral component of membrane (GO:0016021) [0.002]
OG67	38	6	16	52	11	23	12	18	33	13	11	6	6	7	11	43	6	46	40	21	3	8	31	33	9	3	1	1	1	1	2	1	1379	987	986	450	Concanavalin A-like lectin protein kinase family protein [0.292] | receptor lectin kinase [0.209] | Lectin protein kinase [0.121] | Kinase, putative [0.093] | Lectin protein kinase family protein [0.085] | Lectin protein kinase, putative, expressed [0.057] | Lectin kinase [0.049] | Receptor lectin kinase family protein [0.036] | Protein kinase domain containing protein, expressed [0.014] | Lectin…	Concanavalin A-like lectin protein kinase family protein | lectin receptor kinase a4.1 | receptor lectin kinase | lectin receptor kinase a4.3 | Protein kinase superfamily protein | Concanavalin A-like lectin family protein | lectin-receptor kinase	Legume lectin domain (PF00139) [0.945] | Protein kinase domain (PF00069) [0.846] | Protein tyrosine kinase (PF07714) [0.081] | SHS2 domain found in N terminus of Rpb7p/Rpc25p/MJ0397 (PF03876) [0.002] | Glycosyl hydrolases family 16 (PF00722) [0.002] | Xyloglucan endo-transglycosylase (XET) C-terminus (PF06955) [0.002] | Oligonucleotide/oligosaccharide-binding (OB)-fold (PF07717) [0.002] | Mitocho…	Legume lectin domain (IPR001220) [0.945] | Protein kinase domain (IPR000719) [0.846] | Serine-threonine/tyrosine-protein kinase, catalytic domain (IPR001245) [0.081] | Mitochondrial substrate/solute carrier (IPR018108) [0.002] | Xyloglucan endo-transglycosylase, C-terminal (IPR010713) [0.002] | Domain of unknown function DUF1605 (IPR011709) [0.002] | Glycoside hydrolase family 16 (IPR000757) [0.0…	carbohydrate binding (GO:0030246) [0.945] | protein kinase activity (GO:0004672) [0.903] | ATP binding (GO:0005524) [0.846] | DNA-directed 5'-3' RNA polymerase activity (GO:0003899) [0.002] | hydrolase activity, hydrolyzing O-glycosyl compounds (GO:0004553) [0.002] | xyloglucan:xyloglucosyl transferase activity (GO:0016762) [0.002]	protein phosphorylation (GO:0006468) [0.903] | carbohydrate metabolic process (GO:0005975) [0.002] | cellular glucan metabolic process (GO:0006073) [0.002] | transcription, DNA-templated (GO:0006351) [0.002]	cell wall (GO:0005618) [0.002] | apoplast (GO:0048046) [0.002]
OG68	12	15	14	58	21	37	24	18	34	17	11	12	20	10	11	18	23	26	29	19	12	8	6	47	3	0	81	53	55	55	47	41	34	30	31	27	Heavy metal transport/detoxification superfamily protein [0.877] | Heavy metal transport/detoxification protein [0.048] | Copper transport protein family [0.028] | Heavy-metal-associated domain-containing family protein [0.012] | ATFP4 [0.006] | Heavy metal-associated domain, putative [0.004] | NBS-LRR class disease resistance protein [0.004] | Heavy metal-associated domain containing protein [0.…	Copper transport protein family | Heavy metal transport/detoxification superfamily protein	Heavy-metal-associated domain (PF00403) [0.602] | Actin (PF00022) [0.002] | Plant protein of unknown function (PF03140) [0.002]	Heavy metal-associated domain, HMA (IPR006121) [0.602] | Protein of unknown function DUF247, plant (IPR004158) [0.002] | Actin family (IPR004000) [0.002]	metal ion binding (GO:0046872) [0.602]	metal ion transport (GO:0030001) [0.602]	NULL / Representative annotation below 0.1%
OG69	13	9	24	47	37	69	22	22	25	5	21	7	11	12	16	7	14	25	24	26	30	10	5	14	0	0	20	1	21	25	145	22	19	15	13	13	UDP glycosyltransferase [0.287] | UDP-Glycosyltransferase superfamily protein [0.248] | UDP-glucosyltransferase, putative [0.059] | UDP-glycosyltransferase 73B4 [0.051] | Cytokinin-O-glucosyltransferase [0.046] | UDP-glycosyltransferase 1 [0.042] | UDP-glycosyltransferase [0.026] | UDP-glycosyltransferase UGT98B4 [0.026] | UDP-glycosyltransferase 73D1 [0.022] | Cytokinin-O-glucosyltransferase 3 […	UDP-Glycosyltransferase superfamily protein | UDP-glucosyl transferase 73C7 | UDP-glucosyltransferase 73B2 | UDP-glucosyl transferase 73C2 | UDP-glucosyl transferase 73C1 | UDP-glucosyl transferase 73B3 | UDP-glycosyltransferase 73B4 | UDP-glucosyl transferase 73C6 | UDP-glucosyl transferase 73B5 | UDP-glucosyl transferase 73B1 | don-glucosyltransferase 1 | UDP-glucosyl transferase 73D1	UDP-glucoronosyl and UDP-glucosyl transferase (PF00201) [0.895] | CBS domain (PF00571) [0.004] | Isy1-like splicing family (PF06246) [0.002] | Vps51/Vps67 (PF08700) [0.002] | FAE1/Type III polyketide synthase-like protein (PF08392) [0.002]	UDP-glucuronosyl/UDP-glucosyltransferase (IPR002213) [0.895] | CBS domain (IPR000644) [0.004] | Pre-mRNA-splicing factor Isy1 (IPR009360) [0.002] | FAE1/Type III polyketide synthase-like protein (IPR013601) [0.002]	transferase activity, transferring hexosyl groups (GO:0016758) [0.895] | transferase activity, transferring acyl groups other than amino-acyl groups (GO:0016747) [0.002]	metabolic process (GO:0008152) [0.895] | generation of catalytic spliceosome for second transesterification step (GO:0000350) [0.002] | fatty acid biosynthetic process (GO:0006633) [0.002]	membrane (GO:0016020) [0.002]
OG71	0	271	44	0	4	45	3	11	2	6	9	2	0	4	1	4	11	5	0	0	1	0	8	53	0	0	8	17	11	8	11	13	36	117	192	265	RNA-directed DNA polymerase (reverse transcriptase)-related family protein [0.341] | RNA-directed DNA polymerase (Reverse transcriptase) [0.114] | Ribonuclease H-like superfamily protein [0.014] | Retrotransposon protein, putative, unclassified [0.010] | RNA-directed DNA polymerase (Reverse transcriptase); Polynucleotidyl transferase, Ribonuclease H fold [0.010] | RNA directed DNA polymerase [0.0…	Unkown protein(s) / No TAIR description(s)	zinc-binding in reverse transcriptase (PF13966) [0.200] | Reverse transcriptase (RNA-dependent DNA polymerase) (PF00078) [0.017] | Reverse transcriptase-like (PF13456) [0.010] | RNA recognition motif. (a.k.a. RRM, RBD, or RNP domain) (PF00076) [0.006] | Domain of unknown function (DUF4283) (PF14111) [0.004] | Protein of unknown function (DUF1645) (PF07816) [0.002] | Glycosyl hydrolases family 35 …	Reverse transcriptase zinc-binding domain (IPR026960) [0.200] | Reverse transcriptase domain (IPR000477) [0.017] | RNA recognition motif domain (IPR000504) [0.006] | Domain of unknown function DUF4283 (IPR025558) [0.004] | F-box domain (IPR001810) [0.002] | Protein of unknown function DUF1645, plant (IPR012442) [0.002] | Tubby, C-terminal (IPR000007) [0.002] | Thioredoxin domain (IPR013766) [0.00…	nucleic acid binding (GO:0003676) [0.006] | protein binding (GO:0005515) [0.002] | 1,3-beta-D-glucan synthase activity (GO:0003843) [0.002] | DNA binding (GO:0003677) [0.002]	(1->3)-beta-D-glucan biosynthetic process (GO:0006075) [0.002] | regulation of transcription, DNA-templated (GO:0006355) [0.002] | cell redox homeostasis (GO:0045454) [0.002]	1,3-beta-D-glucan synthase complex (GO:0000148) [0.002] | membrane (GO:0016020) [0.002]
OG72	18	16	17	32	20	31	26	24	31	16	18	18	24	14	14	18	18	16	21	24	21	10	11	10	12	3	1	15	13	24	20	16	13	8	7	6	Pathogenesis-related thaumatin superfamily protein [0.395] | Pathogenesis-related thaumatin-like protein [0.228] | Pathogenesis-related thaumatin family protein [0.149] | Thaumatin-like protein [0.122] | Pathogenesis-related thaumatin-like protein protein [0.083] | Thaumatin-like protein 2 [0.006] | 2-oxoglutarate (2OG) and Fe(II)-dependent oxygenase superfamily protein [0.004] | Thaumatin-like f…	Pathogenesis-related thaumatin superfamily protein | pathogenesis-related gene 5 | thaumatin-like protein 3 | THAUMATIN-LIKE PROTEIN 1	Thaumatin family (PF00314) [0.998] | non-haem dioxygenase in morphine synthesis N-terminal (PF14226) [0.004] | 2OG-Fe(II) oxygenase superfamily (PF03171) [0.004] | GDP-fucose protein O-fucosyltransferase (PF10250) [0.002]	Thaumatin (IPR001938) [0.998] | Oxoglutarate/iron-dependent dioxygenase (IPR005123) [0.004] | Non-haem dioxygenase N-terminal domain (IPR026992) [0.004] | GDP-fucose protein O-fucosyltransferase (IPR019378) [0.002]	oxidoreductase activity (GO:0016491) [0.004]	oxidation-reduction process (GO:0055114) [0.004]	NULL / Representative annotation below 0.1%
OG73	12	13	18	33	20	26	15	42	29	15	18	4	13	9	13	18	33	23	14	11	16	13	12	50	6	2	8	17	11	8	648	1055	1068	1065	1492	1515	NAD(P)-binding Rossmann-fold superfamily protein [0.983] | Alcohol dehydrogenase [0.008] | Short-chain dehydrogenase/reductase family protein [0.002] | NAC domain containing protein 28 [0.002] | Short-chain alcohol dehydrogenase [0.002] | Tasselseed2-like short-chain dehydrogenase/reductase [0.002]	NAD(P)-binding Rossmann-fold superfamily protein | TAPETUM 1	Enoyl-(Acyl carrier protein) reductase (PF13561) [0.935] | short chain dehydrogenase (PF00106) [0.117] | No apical meristem (NAM) protein (PF02365) [0.002] | KR domain (PF08659) [0.002]	Short-chain dehydrogenase/reductase SDR (IPR002347) [0.117] | NAC domain (IPR003441) [0.002] | Polyketide synthase, ketoreductase domain (IPR013968) [0.002]	DNA binding (GO:0003677) [0.002]	regulation of transcription, DNA-templated (GO:0006355) [0.002]	NULL / Representative annotation below 0.1%
OG75	36	12	16	12	21	21	18	24	32	12	18	15	35	15	16	16	12	15	16	28	21	10	11	24	13	3	11	13	12	9	13	11	216	205	43	220	Carbohydrate-binding X8 domain superfamily protein [0.718] | Glucan endo-1,3-beta-glucosidase-like protein [0.085] | Glucan endo-1,3-beta-glucosidase, putative [0.064] | Glucan endo-1,3-beta-glucosidase-like protein 1 [0.034] | Glucan endo-1,3-beta-glucosidase [0.032] | Glucan endo-1,3-beta-glucosidase 3 [0.021] | Glucan endo-1 3-beta-glucosidase [0.017] | Glucan endo-1,3-beta-glucosidase 1 [0.01…	Carbohydrate-binding X8 domain superfamily protein | glucan endo-1,3-beta-glucosidase-like protein 3 | plasmodesmata callose-binding protein 4 | plasmodesmata callose-binding protein 1 | O-Glycosyl hydrolases family 17 protein | plasmodesmata callose-binding protein 3 | plasmodesmata callose-binding protein 5	X8 domain (PF07983) [0.989] | Glycosyl hydrolases family 17 (PF00332) [0.068] | N-terminal domain of ribose phosphate pyrophosphokinase (PF13793) [0.002] | Reverse transcriptase-like (PF13456) [0.002]	X8 domain (IPR012946) [0.989] | Glycoside hydrolase family 17 (IPR000490) [0.068] | Ribose-phosphate pyrophosphokinase, N-terminal domain (IPR029099) [0.002]	hydrolase activity, hydrolyzing O-glycosyl compounds (GO:0004553) [0.068]	carbohydrate metabolic process (GO:0005975) [0.068]	NULL / Representative annotation below 0.1%
OG76	1	2	9	1	2	57	2	3	10	2	1	1	3	7	6	2	1	1	1	1	331	1	23	0	1	2	14	39	191	264	278	356	417	493	585	586	Gag-pol polyprotein [0.098] | GAG-POL [0.066] | Gag/pol polyprotein [0.047] | Retrotransposon protein, putative, Ty3-gypsy subclass [0.045] | CHCH domain containing protein [0.040] | NAD(P)H dehydrogenase B1 [0.036] | INVOLVED IN: chromosome segregation, cell division; LOCATED IN: chromosome, centromeric region, nucleus; EXPRESSED IN: 23 plant structures; EXPRESSED DURING: 13 growth stages; [0.02…	copper ion binding	Rubisco LSMT substrate-binding (PF09273) [0.002] | Ribosomal protein L6, N-terminal domain (PF03868) [0.002] | Aspartyl protease (PF13650) [0.002] | Protein of unknown function (DUF1336) (PF07059) [0.002] | Transmembrane amino acid transporter protein (PF01490) [0.002] | F-box domain (PF00646) [0.002]	Amino acid transporter, transmembrane domain (IPR013057) [0.002] | Ribosomal protein L6, N-terminal (IPR005568) [0.002] | Rubisco LSMT, substrate-binding domain (IPR015353) [0.002] | Protein ENHANCED DISEASE RESISTANCE 2, C-terminal (IPR009769) [0.002] | F-box domain (IPR001810) [0.002]	structural constituent of ribosome (GO:0003735) [0.002] | protein binding (GO:0005515) [0.002]	translation (GO:0006412) [0.002]	ribosome (GO:0005840) [0.002] | intracellular (GO:0005622) [0.002]
OG77	13	5	17	63	6	14	30	8	54	25	8	9	36	4	8	16	36	15	13	10	20	15	27	18	1	0	21	49	62	69	61	61	52	90	97	104	Glutamate receptor [0.858] | Glutamate receptor 2 plant, putative [0.036] | Glutamate receptor 2.7 [0.030] | Glutamate receptor 1.2 [0.028] | Glutamate receptor 1.1 [0.021] | Glutamate receptor family protein [0.013] | Glutamate receptor 2.5 [0.004] | glutamate receptor 2.2 [0.004] | glutamate receptor 2 [0.002] | Glutamate receptor 2.9 [0.002] | glutamate receptor 2.4 [0.002]	glutamate receptor 2.1 | glutamate receptor 2.8 | glutamate receptor 2.4 | glutamate receptor 2.6 | glutamate receptor 1.1 | glutamate receptor 2.5 | glutamate receptor 2.2 | glutamate receptor 1.3 | glutamate receptor 2.3 | glutamate receptor 1.4 | glutamate receptor 2.7 | Glutamate receptor family protein | glutamate receptor 2.9	Bacterial extracellular solute-binding proteins, family 3 (PF00497) [0.864] | Receptor family ligand binding region (PF01094) [0.856] | Ligand-gated ion channel (PF00060) [0.849] | Ligated ion channel L-glutamate- and glycine-binding site (PF10613) [0.015] | CBS domain (PF00571) [0.002] | Domain of unknown function (DUF4378) (PF14309) [0.002]	Solute-binding protein family 3/N-terminal domain of MltF (IPR001638) [0.864] | Receptor, ligand binding region (IPR001828) [0.856] | Ionotropic glutamate receptor (IPR001320) [0.849] | Ionotropic glutamate receptor, L-glutamate and glycine-binding domain (IPR019594) [0.015] | CBS domain (IPR000644) [0.002] | Domain of unknown function DUF4378 (IPR025486) [0.002]	ionotropic glutamate receptor activity (GO:0004970) [0.854] | extracellular-glutamate-gated ion channel activity (GO:0005234) [0.015]	NULL / Representative annotation below 0.1%	membrane (GO:0016020) [0.854]
OG78	16	8	17	21	15	38	19	27	29	8	11	7	24	27	10	5	29	19	22	17	28	9	32	25	0	0	65	1	1	38	23	17	12	11	9	7	Mitochondrial transcription termination factor family protein [0.851] | Mitochondrial transcription termination factor-like [0.132] | Mitochondrial transcription termination factor-like family-2 [0.002] | Heat shock 70 kDa protein [0.002] | Mitochondrial transcription termination factor-like family-1 [0.002] | Tryptophan 5-hydroxylase 2 [0.002] | Ribosomal RNA large subunit methyltransferase G [0…	Mitochondrial transcription termination factor family protein	mTERF (PF02536) [0.957] | Hsp70 protein (PF00012) [0.006] | Integrator complex subunit 3 (PF10189) [0.002]	Transcription termination factor, mitochondrial/chloroplastic (IPR003690) [0.957] | Heat shock protein 70 family (IPR013126) [0.006] | Integrator complex subunit 3 (IPR019333) [0.002]	double-stranded DNA binding (GO:0003690) [0.957]	regulation of transcription, DNA-templated (GO:0006355) [0.957]	NULL / Representative annotation below 0.1%
OG79	0	10	9	0	0	5	3	3	6	0	0	37	1	0	0	1	0	0	0	0	387	1	0	0	0	0	14	39	868	745	608	758	755	988	987	987	Retrotransposon protein, putative, Ty1-copia subclass [0.456] | Gag/pol protein [0.032] | BRCT domain-containing DNA repair protein [0.015] | Polyprotein [0.015] | Protein kinase superfamily protein [0.009] | GW2 [0.009] | ATP synthase subunit alpha [0.006] | Xanthine phosphoribosyltransferase 2 [0.006] | 50S ribosomal protein L18 [0.004] | Glutamyl-tRNA(Gln) amidotransferase subunit A [0.004] | …	Unkown protein(s) / No TAIR description(s)	gag-polypeptide of LTR copia-type (PF14223) [0.093] | Zinc knuckle (PF00098) [0.026] | GAG-pre-integrase domain (PF13976) [0.004] | Ribosomal protein L14p/L23e (PF00238) [0.002] | Ribosomal L38e protein family (PF01781) [0.002] | Fringe-like (PF02434) [0.002] | Reverse transcriptase (RNA-dependent DNA polymerase) (PF00078) [0.002]	Zinc finger, CCHC-type (IPR001878) [0.026] | GAG-pre-integrase domain (IPR025724) [0.004] | Fringe-like (IPR003378) [0.002] | Reverse transcriptase domain (IPR000477) [0.002] | Ribosomal protein L38e (IPR002675) [0.002] | Ribosomal protein L14P (IPR000218) [0.002]	nucleic acid binding (GO:0003676) [0.026] | zinc ion binding (GO:0008270) [0.026] | structural constituent of ribosome (GO:0003735) [0.004] | transferase activity, transferring glycosyl groups (GO:0016757) [0.002]	translation (GO:0006412) [0.004]	ribosome (GO:0005840) [0.004] | intracellular (GO:0005622) [0.002] | membrane (GO:0016020) [0.002]
OG80	17	18	19	13	30	48	21	25	23	6	35	13	37	12	13	10	33	19	10	5	7	11	18	15	1	0	184	312	311	530	787	782	783	760	758	752	Non-specific lipid-transfer protein [0.991] | Lipid transfer protein [0.004] | Non-specific lipid-transfer protein 13 [0.002] | Non-specific lipid-transfer protein 15 [0.002]	Bifunctional inhibitor/lipid-transfer protein/seed storage 2S albumin superfamily protein | lipid transfer protein 4 | lipid transfer protein 5 | lipid transfer protein 2 | lipid transfer protein 3 | lipid transfer protein 1 | lipid transfer protein 6 | lipid transfer protein | lipid transfer protein 12	Protease inhibitor/seed storage/LTP family (PF00234) [0.614] | Probable lipid transfer (PF14368) [0.207]	Bifunctional inhibitor/plant lipid transfer protein/seed storage helical domain (IPR016140) [0.821]	NULL / Representative annotation below 0.1%	NULL / Representative annotation below 0.1%	NULL / Representative annotation below 0.1%
OG81	11	2	14	124	12	8	36	9	49	51	7	0	4	0	9	4	2	55	24	5	31	0	2	0	0	0	55	86	19	19	323	229	349	403	474	585	Ankyrin repeat-containing protein, putative [0.407] | Ankyrin repeat family protein [0.264] | ankyrin repeat family protein [0.072] | Ankyrin-like protein [0.072] | Ankyrin repeat protein family-like protein [0.037] | Ankyrin repeat protein-like [0.035] | Ankyrin repeat protein [0.026] | Ankyrin repeat family protein, putative, expressed [0.024] | Ankyrin repeat family protein-like [0.022] | Anky…	Ankyrin repeat family protein | ankyrin repeat family protein	Ankyrin repeats (3 copies) (PF12796) [0.863] | Domain of unknown function (PF13962) [0.730] | Ankyrin repeats (many copies) (PF13637) [0.148] | Ankyrin repeat (PF00023) [0.109] | Ankyrin repeats (many copies) (PF13857) [0.092] | Ankyrin repeat (PF13606) [0.022] | gag-polypeptide of LTR copia-type (PF14223) [0.004] | Ulp1 protease family, C-terminal catalytic domain (PF02902) [0.002] | Carbohydrat…	Ankyrin repeat-containing domain (IPR020683) [0.863] | PGG domain (IPR026961) [0.730] | Ankyrin repeat (IPR002110) [0.129] | Malectin-like carbohydrate-binding domain (IPR024788) [0.002] | Glycoside hydrolase, family 28 (IPR000743) [0.002] | Ulp1 protease family, C-terminal catalytic domain (IPR003653) [0.002] | Reverse transcriptase zinc-binding domain (IPR026960) [0.002]	protein binding (GO:0005515) [0.129] | polygalacturonase activity (GO:0004650) [0.002] | cysteine-type peptidase activity (GO:0008234) [0.002]	carbohydrate metabolic process (GO:0005975) [0.002] | proteolysis (GO:0006508) [0.002]	NULL / Representative annotation below 0.1%
OG82	15	18	17	29	20	14	21	19	27	18	17	17	23	14	15	16	19	11	13	24	15	10	11	30	13	11	55	12	47	53	50	54	114	122	118	138	MLO-like protein [0.998] | Protein kinase superfamily protein [0.002]	Seven transmembrane MLO family protein	Mlo family (PF03094) [1.000] | Zinc knuckle (PF00098) [0.002] | Sec61beta family (PF03911) [0.002] | Cyclin, N-terminal domain (PF00134) [0.002] | Cyclin, C-terminal domain (PF02984) [0.002] | Protein kinase domain (PF00069) [0.002] | PAP_fibrillin (PF04755) [0.002]	Mlo-related protein (IPR004326) [1.000] | Protein transport protein SecG/Sec61-beta/Sbh (IPR016482) [0.002] | Cyclin, N-terminal (IPR006671) [0.002] | Plastid lipid-associated protein/fibrillin conserved domain (IPR006843) [0.002] | Cyclin, C-terminal domain (IPR004367) [0.002] | Zinc finger, CCHC-type (IPR001878) [0.002] | Protein kinase domain (IPR000719) [0.002]	zinc ion binding (GO:0008270) [0.002] | nucleic acid binding (GO:0003676) [0.002] | protein kinase activity (GO:0004672) [0.002] | ATP binding (GO:0005524) [0.002]	defense response (GO:0006952) [1.000] | protein phosphorylation (GO:0006468) [0.002]	integral component of membrane (GO:0016021) [1.000] | nucleus (GO:0005634) [0.002]
OG83	23	17	16	17	24	20	17	29	25	18	19	20	17	17	13	16	10	19	17	34	21	14	8	11	4	2	6	8	1	1	54	3	2	7	71	63	Auxin-responsive protein [0.991] | Auxin-induced protein [0.004] | DNAse I-like superfamily protein [0.002] | Phosphoribosylaminoimidazole-succinocarboxamide synthase [0.002]	AUX/IAA transcriptional regulator family protein | phytochrome-associated protein 2 | indole-3-acetic acid inducible 28 | indoleacetic acid-induced protein 16 | indole-3-acetic acid inducible 5 | indole-3-acetic acid inducible 15 | indole-3-acetic acid inducible 31 | indoleacetic acid-induced protein 8 | indoleacetic acid-induced protein 10 | indole-3-acetic acid inducible 30 | auxin-induced prot…	AUX/IAA family (PF02309) [0.996]	AUX/IAA domain (IPR033389) [0.996]	NULL / Representative annotation below 0.1%	NULL / Representative annotation below 0.1%	NULL / Representative annotation below 0.1%
OG84	19	9	15	14	12	24	16	25	30	10	15	14	20	8	17	1	34	26	32	21	13	9	6	19	15	23	133	239	261	282	301	249	381	370	435	425	Polyubiquitin [0.481] | Ubiquitin-60S ribosomal protein L40 [0.148] | Ubiquitin family protein [0.112] | Ubiquitin [0.098] | Ubiquitin, putative [0.092] | Ubiquitin-like protein [0.016] | Ribosomal protein S27a / Ubiquitin family protein [0.011] | Ubiquitin-40S ribosomal protein S27a [0.009] | Polyubiquitin family protein [0.007] | UBiQuitin family member [0.004] | Ubiquitin fusion protein [0.002…	Ubiquitin-like superfamily protein | Ubiquitin supergroup;Ribosomal protein L40e | ubiquitin 4 | ubiquitin 13 | ubiquitin-related protein 3 | Ubiquitin family protein | ubiquitin 7 | ubiquitin 6 | ubiquitin 5 | ubiquitin extension protein 1 | Ribosomal protein S27a / Ubiquitin family protein | related to ubiquitin 1 | ubiquitin 9 | ubiquitin 12 | polyubiquitin 3 | polyubiquitin 10 | ubiquitin 11 …	Ubiquitin family (PF00240) [0.975] | Ribosomal L40e family (PF01020) [0.190] | Ribosomal protein S27a (PF01599) [0.152] | Ubiquitin-like domain (PF14560) [0.002] | Myb/SANT-like DNA-binding domain (PF12776) [0.002] | Ribosomal protein S11 (PF00411) [0.002] | Ubiquitin-2 like Rad60 SUMO-like (PF11976) [0.002]	Ubiquitin domain (IPR000626) [0.975] | Ribosomal protein L40e (IPR001975) [0.190] | Ribosomal protein S27a (IPR002906) [0.152] | Rad60/SUMO-like domain (IPR022617) [0.002] | Ribosomal protein S11 (IPR001971) [0.002] | Myb/SANT-like domain (IPR024752) [0.002]	protein binding (GO:0005515) [0.975] | structural constituent of ribosome (GO:0003735) [0.342]	translation (GO:0006412) [0.342]	ribosome (GO:0005840) [0.342]
OG85	14	12	17	22	28	29	20	19	28	12	14	11	27	17	17	13	29	19	16	21	13	7	11	15	10	5	30	40	43	43	41	45	53	55	80	77	Major facilitator superfamily protein [0.536] | Sugar transporter, putative [0.397] | Hexose transporter [0.020] | Sugar transport protein [0.013] | Sugar transporter [0.009] | Sugar transporter family protein, expressed [0.004] | Sugar transporter family protein [0.004] | Sugar transport protein 1 [0.002] | sugar transporter 4 [0.002] | sugar transporter 2 [0.002] | sugar transporter 1 [0.002] |…	Major facilitator superfamily protein | sugar transporter 9 | sugar transporter protein 7 | sugar transporter 11 | sugar transporter 14 | sugar transporter 1 | sugar transporter 6 | sugar transporter protein 12 | sugar transporter 4 | sugar transporter 2	Sugar (and other) transporter (PF00083) [1.000] | AP2 domain (PF00847) [0.002] | Probable lipid transfer (PF14368) [0.002]	Major facilitator, sugar transporter-like (IPR005828) [1.000] | AP2/ERF domain (IPR001471) [0.002] | Bifunctional inhibitor/plant lipid transfer protein/seed storage helical domain (IPR016140) [0.002]	transmembrane transporter activity (GO:0022857) [1.000] | transcription factor activity, sequence-specific DNA binding (GO:0003700) [0.002]	transmembrane transport (GO:0055085) [1.000] | regulation of transcription, DNA-templated (GO:0006355) [0.002]	integral component of membrane (GO:0016021) [1.000]
OG86	5	2	2	3	0	1	10	0	60	6	102	5	9	3	2	1	2	8	0	0	8	0	207	0	0	0	1	44	76	76	503	415	406	392	374	366	Aminotransferase-like, plant mobile domain family protein [0.686] | Serine/threonine-protein phosphatase [0.023] | Isoleucine--tRNA ligase [0.009] | Calcineurin-like phosphoesterase-like [0.007] | Transposon protein, putative, Mutator sub-class [0.007] | Elongation factor 4 [0.005] | ATP-dependent Clp protease ATP-binding subunit ClpX [0.005] | UvrABC system protein C [0.005] | Dihydrolipoamide s…	Aminotransferase-like, plant mobile domain family protein | hydrolases;protein serine/threonine phosphatases	Plant mobile domain (PF10536) [0.567] | Calcineurin-like phosphoesterase (PF00149) [0.007] | XRN 5'-3' exonuclease N-terminus (PF03159) [0.002] | Leucine rich repeat (PF13855) [0.002]	Aminotransferase-like, plant mobile domain (IPR019557) [0.567] | Calcineurin-like phosphoesterase domain, ApaH type (IPR004843) [0.007] | Leucine-rich repeat (IPR001611) [0.002] | Putative 5-3 exonuclease (IPR004859) [0.002]	hydrolase activity (GO:0016787) [0.007] | exonuclease activity (GO:0004527) [0.002] | protein binding (GO:0005515) [0.002] | nucleic acid binding (GO:0003676) [0.002]	NULL / Representative annotation below 0.1%	NULL / Representative annotation below 0.1%
OG87	23	13	15	19	20	22	12	20	21	12	24	17	18	19	13	15	11	20	21	29	5	11	9	20	7	15	1	2	2	2	1	2	159	125	90	83	Calcium-dependent protein kinase, putative [0.408] | Calcium-dependent protein kinase [0.381] | Calcium-dependent protein kinase family protein [0.116] | Calcium dependent protein kinase [0.074] | calcium-dependent protein kinase 15 [0.002] | Pentatricopeptide repeat-containing protein [0.002] | phosphoenolpyruvate carboxylase-related kinase 2 [0.002] | calcium-dependent protein kinase 25 [0.002]…	calcium-dependent protein kinase 31 | calmodulin-domain protein kinase 5 | calcium-dependent protein kinase 21 | calcium dependent protein kinase 1 | calcium-dependent protein kinase 6 | calmodulin-domain protein kinase 9 | calmodulin-like domain protein kinase 9 | calmodulin-domain protein kinase cdpk isoform 2 | phosphoenolpyruvate carboxylase-related kinase 2 | calcium-dependent protein kinase…	Protein kinase domain (PF00069) [0.981] | EF-hand domain pair (PF13499) [0.819] | EF hand (PF00036) [0.026] | EF-hand domain pair (PF13833) [0.023] | EF-hand domain (PF13405) [0.016] | EF hand (PF13202) [0.005] | PPR repeat (PF01535) [0.002] | PPR repeat family (PF13041) [0.002] | Ring finger domain (PF13639) [0.002] | DYW family of nucleic acid deaminases (PF14432) [0.002] | Protein tyrosine kin…	Protein kinase domain (IPR000719) [0.981] | EF-hand domain (IPR002048) [0.828] | DYW domain (IPR032867) [0.002] | Pentatricopeptide repeat (IPR002885) [0.002] | Zinc finger, RING-type (IPR001841) [0.002] | Serine-threonine/tyrosine-protein kinase, catalytic domain (IPR001245) [0.002]	protein kinase activity (GO:0004672) [0.981] | ATP binding (GO:0005524) [0.981] | calcium ion binding (GO:0005509) [0.828] | zinc ion binding (GO:0008270) [0.005] | protein binding (GO:0005515) [0.002]	protein phosphorylation (GO:0006468) [0.981]	NULL / Representative annotation below 0.1%
OG88	16	14	14	17	26	10	14	26	28	15	20	18	14	15	8	19	12	15	19	44	26	15	9	5	5	7	24	213	184	822	861	863	874	854	853	847	Zinc finger protein [0.422] | Zinc finger family protein [0.276] | Zinc finger protein, putative [0.144] | C2H2-like zinc finger protein [0.086] | Zinc finger protein-like protein [0.042] | Zinc finger protein MAGPIE [0.009] | Zinc finger, C2H2 type family protein, expressed [0.002] | Finger protein pcp1-like [0.002] | indeterminate(ID)-domain 11 [0.002] | Heat shock protein [0.002] | Zinc finger…	C2H2-like zinc finger protein | C2H2 and C2HC zinc fingers superfamily protein | indeterminate(ID)-domain 16 | indeterminate(ID)-domain 2 | indeterminate(ID)-domain 4 | indeterminate(ID)-domain 14 | indeterminate(ID)-domain 11 | indeterminate(ID)-domain 12 | indeterminate(ID)-domain 5 | indeterminate(ID)-domain 7	Zinc-finger double-stranded RNA-binding (PF12171) [0.538] | Zinc-finger of C2H2 type (PF12874) [0.042] | Zinc finger, C2H2 type (PF00096) [0.016] | C2H2-type zinc finger (PF13912) [0.012] | Histone-binding protein RBBP4 or subunit C of CAF1 complex (PF12265) [0.002] | KH domain (PF00013) [0.002] | F-box associated (PF07734) [0.002]	Zinc finger, double-stranded RNA binding (IPR022755) [0.538] | K Homology domain, type 1 (IPR004088) [0.002] | F-box associated domain, type 1 (IPR006527) [0.002] | Histone-binding protein RBBP4, N-terminal (IPR022052) [0.002]	RNA binding (GO:0003723) [0.002]	NULL / Representative annotation below 0.1%	NULL / Representative annotation below 0.1%
OG89	15	23	20	42	21	31	20	35	32	15	14	0	23	13	21	5	18	22	28	5	0	1	15	0	0	0	21	402	334	323	405	395	386	855	1158	1168	Small, acid-soluble spore protein Tlp [0.002] | Eukaryotic translation initiation factor 3 subunit 7 (eIF-3) [0.002]	Arabidopsis protein of unknown function (DUF241)	Arabidopsis protein of unknown function (PF03087) [0.993]	Protein of unknown function DUF241, plant (IPR004320) [0.993]	NULL / Representative annotation below 0.1%	NULL / Representative annotation below 0.1%	NULL / Representative annotation below 0.1%
OG90	10	8	75	143	18	40	10	12	13	14	7	3	20	4	12	5	2	0	0	2	8	0	9	2	0	0	157	452	548	560	546	459	1132	1131	1129	1136	Ankyrin repeat family protein [0.700] | Ankyrin repeat-containing protein, putative [0.113] | Ankyrin repeat family protein, putative [0.070] | Ankyrin repeat protein [0.070] | Ankyrin repeat-containing protein [0.026] | Ankyrin [0.012] | Ankyrin repeat domain-containing protein [0.005] | Ankyrin repeat-like protein [0.002] | Genomic DNA, chromosome 3, P1 clone: MDC16 [0.002]	Ankyrin repeat family protein | ankyrin	Ankyrin repeats (3 copies) (PF12796) [0.741] | Domain of unknown function (PF13962) [0.683] | Ankyrin repeat (PF00023) [0.110] | Ankyrin repeats (many copies) (PF13857) [0.072] | Ankyrin repeats (many copies) (PF13637) [0.062] | Ankyrin repeat (PF13606) [0.046]	Ankyrin repeat-containing domain (IPR020683) [0.741] | PGG domain (IPR026961) [0.683] | Ankyrin repeat (IPR002110) [0.156]	protein binding (GO:0005515) [0.156]	NULL / Representative annotation below 0.1%	NULL / Representative annotation below 0.1%
OG91	24	8	15	16	15	17	13	22	21	6	30	6	16	12	20	15	29	31	37	14	14	11	8	8	0	0	123	666	600	626	622	1023	1416	1433	2104	2145	Bifunctional inhibitor/lipid-transfer protein/seed storage 2S albumin superfamily protein [1.000]	Bifunctional inhibitor/lipid-transfer protein/seed storage 2S albumin superfamily protein | azelaic acid induced 1 | Auxin-Induced in Root cultures 1 | extensin-like protein | cell wall-plasma membrane linker protein	Hydrophobic seed protein (PF14547) [0.998]	Hydrophobic seed protein (IPR027923) [0.998]	NULL / Representative annotation below 0.1%	NULL / Representative annotation below 0.1%	NULL / Representative annotation below 0.1%
OG92	2	6	7	47	17	27	24	27	26	27	15	0	5	6	12	10	17	28	43	5	13	1	13	23	5	0	1	256	7	6	9	32	1463	1482	1493	1516	O-methyltransferase [0.433] | O-methyltransferase, putative [0.357] | O-methyltransferase-like protein [0.049] | O-methyltransferase family protein [0.027] | Orcinol O-methyltransferase-like protein [0.025] | O-methyltransferase family protein, expressed [0.022] | O-methyltransferase ZRP4 [0.020] | Methyltransferase [0.017] | O-methyltransferase ZRP4, putative, expressed [0.012] | 5-pentadecatrie…	O-methyltransferase family protein	O-methyltransferase (PF00891) [0.966] | Dimerisation domain (PF08100) [0.761]	O-methyltransferase, family 2 (IPR001077) [0.966] | Plant methyltransferase dimerisation (IPR012967) [0.761]	O-methyltransferase activity (GO:0008171) [0.966] | protein dimerization activity (GO:0046983) [0.761]	NULL / Representative annotation below 0.1%	NULL / Representative annotation below 0.1%
OG93	16	15	13	15	16	16	12	17	25	11	12	13	17	42	14	11	12	13	18	17	5	9	13	18	10	25	126	218	312	302	279	116	109	405	476	466	Peptidyl-prolyl cis-trans isomerase [0.852] | Peptidyl-prolyl cis-trans isomerase CYP40 [0.096] | Peptidyl-prolyl cis-trans isomerase, putative [0.032] | Cyclophilin-like peptidyl-prolyl cis-trans isomerase family protein [0.012] | Peptidyl-prolyl cis-trans isomerase B [0.005] | Peptidyl-prolyl cis-trans isomerase-like protein [0.002]	Cyclophilin-like peptidyl-prolyl cis-trans isomerase family protein | rotamase CYP 1 | cyclophilin 20-2 | rotamase CYP 3 | peptidyl-prolyl cis-trans isomerase / cyclophilin-40 (CYP40) / rotamase | rotamase cyclophilin 5 | rotamase cyclophilin 2 | rotamase CYP 7 | rotamase CYP 4 | cyclophilin 5	Cyclophilin type peptidyl-prolyl cis-trans isomerase/CLD (PF00160) [0.985] | Tetratricopeptide repeat (PF00515) [0.072] | Tetratricopeptide repeat (PF13181) [0.015] | Tetratricopeptide repeat (PF07719) [0.012] | Ribosomal protein S5, C-terminal domain (PF03719) [0.002]	Cyclophilin-type peptidyl-prolyl cis-trans isomerase domain (IPR002130) [0.985] | Tetratricopeptide repeat 1 (IPR001440) [0.072] | Tetratricopeptide repeat (IPR019734) [0.015] | Tetratricopeptide repeat 2 (IPR013105) [0.012] | Ribosomal protein S5, C-terminal (IPR005324) [0.002]	peptidyl-prolyl cis-trans isomerase activity (GO:0003755) [0.985] | protein binding (GO:0005515) [0.086] | structural constituent of ribosome (GO:0003735) [0.002]	protein peptidyl-prolyl isomerization (GO:0000413) [0.985] | protein folding (GO:0006457) [0.985] | translation (GO:0006412) [0.002]	ribosome (GO:0005840) [0.002]
OG94	16	21	19	22	23	20	16	28	21	16	17	13	24	16	12	15	11	14	11	24	7	9	10	11	3	4	24	411	356	340	322	308	299	494	477	467	Beta-galactosidase [0.988] | Beta-galactosidase family protein [0.010] | Beta-galactosidase, putative [0.002]	beta-galactosidase 16 | beta galactosidase 1 | beta-galactosidase 8 | beta galactosidase 9 | beta-galactosidase 14 | Glycosyl hydrolase family 35 protein | beta-galactosidase 4 | beta-galactosidase 7 | beta-galactosidase 12 | beta-galactosidase 10 | beta-galactosidase 11 | beta-galactosidase 3 | beta-galactosidase 5 | beta-galactosidase 15 | beta-galactosidase 2 | glycosyl hydrolase family 35 pro…	Glycosyl hydrolases family 35 (PF01301) [0.973] | Galactose binding lectin domain (PF02140) [0.722] | Beta-galactosidase jelly roll domain (PF13364) [0.097] | KIP1-like protein (PF07765) [0.002] | PRP1 splicing factor, N-terminal (PF06424) [0.002] | NB-ARC domain (PF00931) [0.002]	Glycoside hydrolase 35, catalytic domain (IPR031330) [0.973] | D-galactoside/L-rhamnose binding SUEL lectin domain (IPR000922) [0.722] | Beta-galactosidase jelly roll domain (IPR025300) [0.097] | NB-ARC (IPR002182) [0.002] | PRP1 splicing factor, N-terminal (IPR010491) [0.002] | Protein Networked (NET), actin-binding (NAB) domain (IPR011684) [0.002]	carbohydrate binding (GO:0030246) [0.722] | ADP binding (GO:0043531) [0.002] | actin binding (GO:0003779) [0.002]	mRNA splicing, via spliceosome (GO:0000398) [0.002]	nucleus (GO:0005634) [0.002]
OG95	2	7	18	74	33	45	20	25	12	12	5	0	9	1	7	16	12	37	14	13	4	13	8	8	0	7	1	1	1	1	2	21	15	393	375	367	Kinase, putative [0.532] | receptor lectin kinase [0.092] | Lectin [0.065] | Lectin-like receptor kinase [0.062] | Concanavalin A-like lectin protein kinase family protein [0.030] | Lectin-like protein [0.027] | Protein kinase [0.017] | Cysteine-rich receptor-like protein kinase 25 [0.015] | Lectin-related protein [0.012] | Receptor-like protein kinase [0.012] | Lectin receptor-like kinase Tg-20 …	Concanavalin A-like lectin protein kinase family protein	Legume lectin domain (PF00139) [0.861] | Protein kinase domain (PF00069) [0.749] | Protein tyrosine kinase (PF07714) [0.035] | Salt stress response/antifungal (PF01657) [0.022] | Plastocyanin-like domain (PF02298) [0.005] | Hsp20/alpha crystallin family (PF00011) [0.005] | AMP-binding enzyme (PF00501) [0.005] | Cysteine-rich secretory protein family (PF00188) [0.002] | Predicted small integral me…	Legume lectin domain (IPR001220) [0.861] | Protein kinase domain (IPR000719) [0.749] | Serine-threonine/tyrosine-protein kinase, catalytic domain (IPR001245) [0.035] | Gnk2-homologous domain (IPR002902) [0.022] | Alpha crystallin/Hsp20 domain (IPR002068) [0.005] | AMP-dependent synthetase/ligase (IPR000873) [0.005] | Phytocyanin domain (IPR003245) [0.005] | Peptidase S10, serine carboxypeptidase …	carbohydrate binding (GO:0030246) [0.861] | protein kinase activity (GO:0004672) [0.771] | ATP binding (GO:0005524) [0.749] | electron carrier activity (GO:0009055) [0.005] | catalytic activity (GO:0003824) [0.005] | serine-type carboxypeptidase activity (GO:0004185) [0.002]	protein phosphorylation (GO:0006468) [0.771] | metabolic process (GO:0008152) [0.005] | proteolysis (GO:0006508) [0.002]	NULL / Representative annotation below 0.1%
OG96	14	12	12	22	22	25	14	20	19	13	12	16	16	12	12	17	12	15	17	39	16	12	6	14	9	3	129	55	223	169	980	987	1000	989	988	988	Heavy metal transport/detoxification superfamily protein [0.960] | Copper chaperone [0.010] | Chloroplast-targeted copper chaperone protein [0.007] | Magnesium transporter NIPA2 [0.005] | copper chaperone [0.002] | PAS domain-containing protein tyrosine kinase family protein [0.002] | Chloroplast-targeted copper chaperone, putative [0.002] | Metal ion binding protein [0.002] | S-adenosyl-L-methio…	Heavy metal transport/detoxification superfamily protein | Chloroplast-targeted copper chaperone protein | copper chaperone | homolog of anti-oxidant 1	Heavy-metal-associated domain (PF00403) [0.925] | Magnesium transporter NIPA (PF05653) [0.005] | Putative S-adenosyl-L-methionine-dependent methyltransferase (PF03141) [0.002]	Heavy metal-associated domain, HMA (IPR006121) [0.925] | Magnesium transporter NIPA (IPR008521) [0.005] | Putative S-adenosyl-L-methionine-dependent methyltransferase (IPR004159) [0.002]	metal ion binding (GO:0046872) [0.925] | magnesium ion transmembrane transporter activity (GO:0015095) [0.005] | methyltransferase activity (GO:0008168) [0.002]	metal ion transport (GO:0030001) [0.925] | magnesium ion transport (GO:0015693) [0.005]	integral component of membrane (GO:0016021) [0.005]
OG97	12	12	14	16	18	21	14	21	25	16	15	12	21	12	12	14	14	19	19	29	21	11	12	5	6	9	60	359	644	679	684	672	676	664	1592	1618	AP2-like ethylene-responsive transcription factor [0.345] | AP2-like ethylene-responsive transcription factor ANT [0.210] | AP2-like ethylene-responsive transcription factor BBM [0.120] | AP2-like ethylene-responsive transcription factor AIL5 [0.087] | AP2-type transcription factor [0.055] | AP2-like ethylene-responsive transcription factor PLT2 [0.043] | AP2-like ethylene-responsive transcriptio…	Integrase-type DNA-binding superfamily protein | ARIA-interacting double AP2 domain protein | AINTEGUMENTA-like 6 | AINTEGUMENTA-like 5 | AINTEGUMENTA-like 7	AP2 domain (PF00847) [0.925]	AP2/ERF domain (IPR001471) [0.925]	transcription factor activity, sequence-specific DNA binding (GO:0003700) [0.925]	regulation of transcription, DNA-templated (GO:0006355) [0.925]	NULL / Representative annotation below 0.1%
OG98	18	9	14	15	16	17	11	16	25	10	17	16	13	15	10	13	15	18	16	15	19	10	16	29	11	11	1	1	1	1	1	2	5	SINGLETON	SINGLETON	SINGLETON	Bifunctional inhibitor/lipid-transfer protein/seed storage 2S albumin superfamily protein [0.577] | Non-specific lipid-transfer protein [0.132] | Lipid transfer protein [0.091] | Protease inhibitor/seed storage/lipid transfer family protein [0.081] | Protease inhibitor/seed storage/lipid transfer protein family protein [0.038] | Nonspecific lipid-transfer protein, putative [0.028] | Bifunctional …	Bifunctional inhibitor/lipid-transfer protein/seed storage 2S albumin superfamily protein | glycosylphosphatidylinositol-anchored lipid protein transfer 1	Probable lipid transfer (PF14368) [0.990] | Leucine rich repeat (PF13855) [0.008] | Peptidase family M23 (PF01551) [0.003] | Leucine Rich Repeat (PF00560) [0.003]	Bifunctional inhibitor/plant lipid transfer protein/seed storage helical domain (IPR016140) [0.990] | Leucine-rich repeat (IPR001611) [0.008] | Peptidase M23 (IPR016047) [0.003]	protein binding (GO:0005515) [0.008]	NULL / Representative annotation below 0.1%	NULL / Representative annotation below 0.1%
OG99	17	12	10	10	18	31	11	13	18	10	50	20	20	17	6	11	9	14	14	21	16	13	7	21	1	4	8	1	1	1	2	1	1	1	989	989	Homeobox-leucine zipper family protein [0.553] | Homeobox-leucine zipper protein HDG1 [0.150] | Homeobox-leucine zipper protein GLABRA [0.063] | Homeobox-leucine zipper protein ROC5 [0.036] | Homeobox-leucine zipper protein ROC8 [0.025] | Homeobox-leucine zipper protein ROC7 [0.025] | Homeobox protein, putative [0.018] | Homeobox-leucine zipper protein HDG11 [0.015] | Homeobox-leucine zipper prot…	Homeobox-leucine zipper family protein / lipid-binding START domain-containing protein | homeodomain GLABROUS 7 | homeodomain GLABROUS 11 | homeobox-7 | homeodomain GLABROUS 9 | homeodomain GLABROUS 3 | homeodomain GLABROUS 10 | START (StAR-related lipid-transfer) lipid-binding domain | homeodomain GLABROUS 4 | homeodomain GLABROUS 8 | homeodomain GLABROUS 2 | FLOWERING WAGENINGEN | homeodomain G…	START domain (PF01852) [0.858] | Homeobox domain (PF00046) [0.756] | Endomembrane protein 70 (PF02990) [0.003] | Gamma-glutamyltranspeptidase (PF01019) [0.003]	START domain (IPR002913) [0.858] | Homeobox domain (IPR001356) [0.756] | Nonaspanin (TM9SF) (IPR004240) [0.003] | Gamma-glutamyltranspeptidase (IPR000101) [0.003]	lipid binding (GO:0008289) [0.858] | DNA binding (GO:0003677) [0.756] | glutathione hydrolase activity (GO:0036374) [0.003]	glutathione catabolic process (GO:0006751) [0.003]	integral component of membrane (GO:0016021) [0.003]
OG100	17	2	28	43	20	22	7	14	27	16	31	0	19	3	36	8	24	30	19	6	8	0	8	5	0	0	49	361	327	569	844	844	847	827	826	820	Sulfotransferase family protein [0.478] | Sulfotransferase [0.135] | Sulfotransferase-like protein [0.104] | Sulfotransferase 17 [0.046] | Flavonol sulfotransferase-like protein [0.041] | Flavonol 4'-sulfotransferase, putative [0.038] | Sulfotransferase domain containing protein, expressed [0.028] | Sulfotransferase 16 [0.025] | Flavonol sulfotransferase-like [0.025] | P-loop containing nucleosid…	P-loop containing nucleoside triphosphate hydrolases superfamily protein | sulfotransferase 16 | sulfotransferase 4A | desulfo-glucosinolate sulfotransferase 18 | sulphotransferase 7 | sulfotransferase 2B | sulfotransferase 17 | sulfotransferase 4C | sulfotransferase 2A | sulphotransferase 12 | sulfotransferase 4B	Sulfotransferase domain (PF00685) [0.997]	Sulfotransferase domain (IPR000863) [0.997]	sulfotransferase activity (GO:0008146) [0.997]	NULL / Representative annotation below 0.1%	NULL / Representative annotation below 0.1%
OG101	16	14	22	38	18	54	24	14	14	23	29	3	19	11	23	10	28	8	12	2	5	3	3	0	0	0	1	15	13	24	20	16	13	8	7	6	2-oxoglutarate (2OG) and Fe(II)-dependent oxygenase superfamily protein [0.990] | 2-oxoglutarate (2OG) and Fe(II)-dependent oxygenase superfamily protein, putative [0.010]	2-oxoglutarate (2OG) and Fe(II)-dependent oxygenase superfamily protein	2OG-Fe(II) oxygenase superfamily (PF03171) [0.919] | non-haem dioxygenase in morphine synthesis N-terminal (PF14226) [0.865] | RNA recognition motif. (a.k.a. RRM, RBD, or RNP domain) (PF00076) [0.003]	Oxoglutarate/iron-dependent dioxygenase (IPR005123) [0.919] | Non-haem dioxygenase N-terminal domain (IPR026992) [0.865] | RNA recognition motif domain (IPR000504) [0.003]	oxidoreductase activity (GO:0016491) [0.919] | nucleic acid binding (GO:0003676) [0.003]	oxidation-reduction process (GO:0055114) [0.919]	NULL / Representative annotation below 0.1%
OG102	12	10	13	12	18	19	13	15	22	13	13	19	10	15	9	15	9	15	15	48	27	12	10	9	10	9	147	6	18	20	166	445	SINGLETON	SINGLETON	SINGLETON	SINGLETON	Squamosa promoter-binding protein [0.171] | Squamosa promoter-binding protein, putative [0.163] | Squamosa promoter binding protein [0.156] | Squamosa promoter-binding-like protein [0.089] | Squamosa promoter binding-like protein [0.079] | Squamosa promoter binding protein-like protein [0.074] | SQUAMOSA promoter binding protein-like protein [0.061] | SQUAMOSA promoter-binding-like 10 [0.028] | S…	Squamosa promoter-binding protein-like (SBP domain) transcription factor family protein | squamosa promoter binding protein-like 4 | squamosa promoter binding protein-like 9 | squamosa promoter-like 11 | squamosa promoter binding protein-like 3 | squamosa promoter binding protein-like 10 | squamosa promoter binding protein-like 15 | squamosa promoter binding protein-like 8 | squamosa promoter bin…	SBP domain (PF03110) [0.980]	Transcription factor, SBP-box (IPR004333) [0.980]	DNA binding (GO:0003677) [0.980]	NULL / Representative annotation below 0.1%	nucleus (GO:0005634) [0.980]
OG103	11	13	11	46	22	20	16	18	23	9	14	21	12	6	7	7	17	12	20	7	16	7	21	20	14	0	50	45	37	36	36	33	28	24	22	1404	Cysteine protease, putative [0.441] | Cysteine proteinase [0.192] | Cysteine protease [0.190] | Cysteine proteinases superfamily protein [0.097] | Vignain [0.038] | Cysteine endopeptidase [0.010] | Cysteine protease 1 [0.008] | Cysteine protease CP8 [0.005] | Papain family cysteine protease containing protein, expressed [0.003] | Cys endopeptidase family protein [0.003] | Papain family cysteine p…	Cysteine proteinases superfamily protein | Papain family cysteine protease | senescence-associated gene 12	Papain family cysteine protease (PF00112) [0.956] | Cathepsin propeptide inhibitor domain (I29) (PF08246) [0.877] | Aspartic acid proteinase inhibitor (PF16845) [0.003] | Granulin (PF00396) [0.003] | Sigma-70 region 3 (PF04539) [0.003] | Sigma-70 region 2 (PF04542) [0.003]	Peptidase C1A, papain C-terminal (IPR000668) [0.956] | Cathepsin propeptide inhibitor domain (I29) (IPR013201) [0.877] | Cystatin domain (IPR000010) [0.003] | RNA polymerase sigma-70 region 2 (IPR007627) [0.003] | Granulin (IPR000118) [0.003] | RNA polymerase sigma-70 region 3 (IPR007624) [0.003]	cysteine-type peptidase activity (GO:0008234) [0.956] | cysteine-type endopeptidase inhibitor activity (GO:0004869) [0.003] | DNA binding (GO:0003677) [0.003] | transcription factor activity, sequence-specific DNA binding (GO:0003700) [0.003] | sigma factor activity (GO:0016987) [0.003]	proteolysis (GO:0006508) [0.956] | regulation of transcription, DNA-templated (GO:0006355) [0.003] | DNA-templated transcription, initiation (GO:0006352) [0.003]	NULL / Representative annotation below 0.1%
OG104	14	5	9	8	11	32	9	14	20	11	17	11	12	15	10	22	17	14	12	18	14	10	2	60	6	17	54	106	273	283	351	470	465	456	438	428	Histone H3 [0.974] | Histone H3 like protein [0.021] | Histone H3, putative, expressed [0.003] | Histone H3, putative [0.003]	Histone superfamily protein | histone 3 11 | male-gamete-specific histone H3	Core histone H2A/H2B/H3/H4 (PF00125) [0.946] | Probable lipid transfer (PF14368) [0.005] | Membrane transport protein (PF03547) [0.003] | Domain of unknown function (DUF3546) (PF12066) [0.003] | Ubiquitin family (PF00240) [0.003] | Arsenite-resistance protein 2 (PF04959) [0.003]	Histone H2A/H2B/H3 (IPR007125) [0.946] | Bifunctional inhibitor/plant lipid transfer protein/seed storage helical domain (IPR016140) [0.005] | Arsenite-resistance protein 2 (IPR007042) [0.003] | Membrane transport protein (IPR004776) [0.003] | Protein of unknown function DUF3546 (IPR021933) [0.003] | Ubiquitin domain (IPR000626) [0.003]	DNA binding (GO:0003677) [0.946] | protein binding (GO:0005515) [0.003]	transmembrane transport (GO:0055085) [0.003]	integral component of membrane (GO:0016021) [0.003]
OG105	14	8	15	30	16	30	17	29	21	15	18	7	10	7	15	7	19	17	17	5	9	2	27	30	3	0	20	1	21	25	30	22	19	15	13	13	UDP-Glycosyltransferase superfamily protein [0.464] | UDP-glucosyltransferase, putative [0.173] | UDP-glycosyltransferase 1 [0.103] | UDP-glycosyltransferase 74F2 [0.049] | Glycosyltransferase [0.044] | UDP-glycosyltransferase [0.026] | Limonoid UDP-glucosyltransferase [0.021] | UDP-glycosyltransferase UGT84C2 [0.018] | UDP-glucose glucosyltransferase [0.013] | UDP-glycosyltransferase 74B1 [0.010…	UDP-Glycosyltransferase superfamily protein | UDP-glucosyl transferase 74D1 | Uridine diphosphate glycosyltransferase 74E2 | UDP-glucosyltransferase 74F2 | UDP-glucosyl transferase 84B1 | UDP-glucosyl transferase 84B2 | UDP-glucosyl transferase 74B1 | UDP-glycosyltransferase 74 F1	UDP-glucoronosyl and UDP-glucosyl transferase (PF00201) [0.915]	UDP-glucuronosyl/UDP-glucosyltransferase (IPR002213) [0.915]	transferase activity, transferring hexosyl groups (GO:0016758) [0.915]	metabolic process (GO:0008152) [0.915]	NULL / Representative annotation below 0.1%
OG107	1	256	11	0	1	14	0	0	1	1	0	31	0	44	3	0	4	4	0	0	5	2	0	0	1	1	115	3	4	434	268	339	407	481	459	451	Gag-pol polyprotein [0.371] | Mutant gag-pol polyprotein [0.153] | Retrotransposon protein, putative, Ty3-gypsy subclass [0.061] | Retrotransposon protein, putative, Ty3-gypsy sub-class [0.055] | Retrotransposon gag protein, putative [0.034] | Gag polyprotein [0.021] | Truncated putative gag polyprotein [0.016] | NADH-quinone oxidoreductase subunit I [0.008] | Zinc finger CCHC-type and RNA-bindin…	Unkown protein(s) / No TAIR description(s)	Zinc knuckle (PF00098) [0.045] | Aspartyl protease (PF13650) [0.045] | gag-polyprotein putative aspartyl protease (PF13975) [0.005] | AMP-binding enzyme (PF00501) [0.005] | O-methyltransferase (PF00891) [0.003] | Ubiquitin carboxyl-terminal hydrolase (PF00443) [0.003]	Zinc finger, CCHC-type (IPR001878) [0.045] | AMP-dependent synthetase/ligase (IPR000873) [0.005] | O-methyltransferase, family 2 (IPR001077) [0.003] | Peptidase C19, ubiquitin carboxyl-terminal hydrolase (IPR001394) [0.003]	zinc ion binding (GO:0008270) [0.045] | nucleic acid binding (GO:0003676) [0.045] | catalytic activity (GO:0003824) [0.005] | O-methyltransferase activity (GO:0008171) [0.003] | thiol-dependent ubiquitinyl hydrolase activity (GO:0036459) [0.003]	metabolic process (GO:0008152) [0.005] | protein deubiquitination (GO:0016579) [0.003]	NULL / Representative annotation below 0.1%
OG108	8	14	16	27	15	19	13	33	20	12	13	5	23	12	9	24	13	11	11	7	16	14	12	20	0	11	34	29	20	16	128	151	150	144	140	147	17.5 kDa class I heat shock protein [0.265] | 18.2 kDa class I heat shock protein [0.225] | Heat-shock protein, putative [0.114] | Class I heat shock protein [0.106] | 17.3 kDa class I heat shock protein [0.082] | 17.9 kDa class I heat shock protein [0.050] | 17.8 kDa class I heat shock protein [0.021] | 18.5 kDa class I heat shock protein [0.021] | 18.2 kDa class I heat shock family protein [0.0…	HSP20-like chaperones superfamily protein | heat shock protein 17.4 | heat shock protein 18.2	Hsp20/alpha crystallin family (PF00011) [0.989] | Peroxidase (PF00141) [0.003]	Alpha crystallin/Hsp20 domain (IPR002068) [0.989] | Haem peroxidase, plant/fungal/bacterial (IPR002016) [0.003]	peroxidase activity (GO:0004601) [0.003] | heme binding (GO:0020037) [0.003]	response to oxidative stress (GO:0006979) [0.003] | oxidation-reduction process (GO:0055114) [0.003]	NULL / Representative annotation below 0.1%
OG109	18	9	10	16	19	24	11	17	24	6	32	13	20	18	19	16	13	15	16	22	10	8	7	9	3	2	6	153	164	178	154	143	SINGLETON	SINGLETON	SINGLETON	SINGLETON	Glutaredoxin family protein [0.599] | Glutaredoxin [0.263] | Glutaredoxin-like family protein [0.061] | Glutaredoxin-C13 [0.011] | Glutaredoxin, grx, putative [0.011] | Glutaredoxin-C9 [0.011] | Glutaredoxin-C15 [0.008] | Glutaredoxin-C7 [0.005] | Monothiol glutaredoxin-S5 [0.005] | Grx_I1-glutaredoxin subgroup III [0.003] | Glutaredoxin-C3 [0.003] | Monothiol glutaredoxin-S3 [0.003] | Glutaredox…	Thioredoxin superfamily protein | Glutaredoxin family protein	Glutaredoxin (PF00462) [0.968] | Major intrinsic protein (PF00230) [0.003] | Transferase family (PF02458) [0.003] | Lipase (class 3) (PF01764) [0.003]	Glutaredoxin (IPR002109) [0.968] | Transferase (IPR003480) [0.003] | Major intrinsic protein (IPR000425) [0.003] | Fungal lipase-like domain (IPR002921) [0.003]	electron carrier activity (GO:0009055) [0.968] | protein disulfide oxidoreductase activity (GO:0015035) [0.968] | transferase activity, transferring acyl groups other than amino-acyl groups (GO:0016747) [0.003] | transporter activity (GO:0005215) [0.003]	cell redox homeostasis (GO:0045454) [0.968] | transport (GO:0006810) [0.003] | lipid metabolic process (GO:0006629) [0.003]	membrane (GO:0016020) [0.003]
OG110	17	10	8	8	17	24	13	17	19	7	15	21	17	14	6	20	17	15	12	26	14	9	6	14	10	21	1	657	720	925	314	340	408	578	730	990	Calmodulin [0.432] | Calmodulin, putative [0.162] | Calmodulin-related protein [0.085] | EF hand calcium-binding protein family [0.072] | Calcium binding protein [0.061] | Calcium binding family protein [0.027] | calmodulin like 23 [0.024] | Calcium-binding pollen allergen [0.016] | Calmodulin 24-like protein [0.013] | Calmodulin family protein [0.013] | Calcium-binding EF-hand family protein [0.…	EF hand calcium-binding protein family | calmodulin 8 | calmodulin 7 | calmodulin 3 | calmodulin 4 | calmodulin-like 11 | calmodulin 5 | calmodulin like 23 | calmodulin 1 | calmodulin 2 | calmodulin 6 | Calcium-binding EF-hand family protein	EF-hand domain pair (PF13499) [0.966] | EF-hand domain pair (PF13833) [0.103] | EF hand (PF13202) [0.050] | EF hand (PF00036) [0.032] | EF-hand domain (PF13405) [0.011] | Casein Kinase 2 substrate (PF15011) [0.003] | F-box domain (PF00646) [0.003]	EF-hand domain (IPR002048) [0.984] | F-box domain (IPR001810) [0.003] | Casein Kinase 2 substrate (IPR029159) [0.003]	calcium ion binding (GO:0005509) [0.984] | protein binding (GO:0005515) [0.003]	NULL / Representative annotation below 0.1%	NULL / Representative annotation below 0.1%
OG112	16	10	13	18	15	19	12	17	24	8	17	23	16	10	12	20	12	13	15	17	15	12	12	9	7	13	20	149	162	146	131	117	111	101	94	86	3-ketoacyl-CoA synthase [1.000]	3-ketoacyl-CoA synthase 5 | 3-ketoacyl-CoA synthase 9 | 3-ketoacyl-CoA synthase 17 | 3-ketoacyl-CoA synthase 14 | 3-ketoacyl-CoA synthase 11 | 3-ketoacyl-CoA synthase 4 | 3-ketoacyl-CoA synthase 7 | 3-ketoacyl-CoA synthase 15 | 3-ketoacyl-CoA synthase 6 | 3-ketoacyl-CoA synthase 8 | 3-ketoacyl-CoA synthase 21 | 3-ketoacyl-CoA synthase 2 | 3-ketoacyl-CoA synthase 1 | 3-ketoacyl-CoA synthase 20 | 3…	FAE1/Type III polyketide synthase-like protein (PF08392) [0.976] | 3-Oxoacyl-[acyl-carrier-protein (ACP)] synthase III C terminal (PF08541) [0.947] | Chalcone and stilbene synthases, C-terminal domain (PF02797) [0.040] | WD domain, G-beta repeat (PF00400) [0.003] | Transcriptional repressor, ovate (PF04844) [0.003]	FAE1/Type III polyketide synthase-like protein (IPR013601) [0.976] | 3-Oxoacyl-[acyl-carrier-protein (ACP)] synthase III, C-terminal (IPR013747) [0.947] | Chalcone/stilbene synthase, C-terminal (IPR012328) [0.040] | Ovate protein family, C-terminal (IPR006458) [0.003] | WD40 repeat (IPR001680) [0.003]	transferase activity, transferring acyl groups other than amino-acyl groups (GO:0016747) [0.976] | protein binding (GO:0005515) [0.003]	fatty acid biosynthetic process (GO:0006633) [0.976]	membrane (GO:0016020) [0.976]
OG113	15	12	11	14	17	13	11	18	24	10	20	18	23	18	7	14	11	13	17	36	5	15	8	4	8	12	3	172	7	6	115	97	162	157	152	164	myb domain protein 105 [0.195] | Myb-like protein [0.123] | myb domain protein 73 [0.086] | MYB domain class transcription factor [0.067] | myb domain protein 52 [0.059] | myb domain protein 109 [0.051] | R2r3-myb transcription factor, putative [0.048] | myb domain protein r1 [0.029] | MYB transcription factor [0.029] | myb domain protein 56 [0.027] | Myb-like protein, putative [0.027] | myb doma…	myb domain protein 70 | myb domain protein 54 | myb domain protein 52 | myb domain protein 69 | myb domain protein 1 | myb domain protein 73 | myb domain protein 105 | myb domain protein 25 | myb domain protein 89 | myb domain protein 117 | myb domain protein 77 | myb domain protein 110 | myb domain protein r1 | myb domain protein 56 | myb domain protein 109	Myb-like DNA-binding domain (PF00249) [0.882] | Myb-like DNA-binding domain (PF13921) [0.107] | Protein of unknown function, DUF617 (PF04759) [0.003]	SANT/Myb domain (IPR001005) [0.882] | Protein MIZU-KUSSEI 1-like, plant (IPR006460) [0.003]	NULL / Representative annotation below 0.1%	NULL / Representative annotation below 0.1%	NULL / Representative annotation below 0.1%
OG114	14	12	11	13	19	15	10	20	20	11	18	28	13	15	13	15	10	12	10	28	13	5	7	17	4	17	38	121	159	158	149	93	74	65	53	54	Homeobox-leucine zipper protein family [0.384] | Homeobox-leucine zipper family protein [0.108] | Homeobox-leucine zipper-like protein [0.105] | Homeobox-leucine zipper protein [0.086] | Homeobox leucine zipper family protein [0.068] | Homeobox leucine zipper protein [0.041] | Homeobox protein, putative [0.038] | Homeobox-leucine zipper protein HAT5-like protein [0.030] | Homeobox-leucine zipper …	Homeobox-leucine zipper protein family | homeobox 12 | homeobox 3 | homeobox protein 5 | homeobox protein 16 | homeobox protein 23 | homeobox protein 6 | homeobox 51 | homeobox protein 20 | homeobox protein 22 | homeobox protein 52 | homeobox 7 | homeobox 1	Homeobox domain (PF00046) [0.992] | Homeobox associated leucine zipper (PF02183) [0.903] | PRA1 family protein (PF03208) [0.003]	Homeobox domain (IPR001356) [0.992] | Leucine zipper, homeobox-associated (IPR003106) [0.903] | Prenylated rab acceptor PRA1 (IPR004895) [0.003]	DNA binding (GO:0003677) [0.992] | transcription factor activity, sequence-specific DNA binding (GO:0003700) [0.903] | sequence-specific DNA binding (GO:0043565) [0.903]	regulation of transcription, DNA-templated (GO:0006355) [0.903]	NULL / Representative annotation below 0.1%
OG115	13	7	12	12	16	17	12	18	22	6	19	13	16	13	10	9	9	24	25	26	25	14	10	1	5	11	27	550	581	604	588	576	2271	2380	2466	2540	Ovate family protein [0.685] | Ovate protein [0.104] | Plant-specific domain TIGR01568 family protein [0.060] | Ovate-like protein [0.044] | ovate family protein 13 [0.019] | ovate family protein 8 [0.011] | Plant-specific domain TIGR01568 family [0.011] | ovate family protein 1 [0.005] | ovate family protein 4 [0.005] | ovate family protein 2 [0.005] | Ethylene receptor [0.005] | cDNA, clone: J0…	Ovate family protein | ovate family protein 5 | ovate family protein 8 | ovate family protein 2 | ovate family protein 6 | ovate family protein 7 | ovate family protein 11 | ovate family protein 12 | ovate family protein 3 | ovate family protein 1 | ovate family protein 4 | ovate family protein 16	Transcriptional repressor, ovate (PF04844) [0.975] | DNA-binding domain (PF13724) [0.151] | Prephenate dehydratase (PF00800) [0.003]	Ovate protein family, C-terminal (IPR006458) [0.975] | DNA-binding domain, ovate family-like (IPR025830) [0.151] | Prephenate dehydratase (IPR001086) [0.003]	DNA binding (GO:0003677) [0.151] | prephenate dehydratase activity (GO:0004664) [0.003]	L-phenylalanine biosynthetic process (GO:0009094) [0.003]	NULL / Representative annotation below 0.1%
OG116	14	11	13	36	24	26	17	18	21	14	19	7	22	5	20	6	10	10	13	16	3	5	9	16	10	0	1	2	2	23	24	24	21	1483	1494	1517	Gibberellin-regulated family protein [0.482] | Gibberellin-regulated protein [0.403] | Gibberellin-regulated protein 2 [0.036] | Gibberellin-regulated protein 2, putative [0.025] | Gibberellin regulated protein [0.019] | Gibberellin induced protein [0.008] | Gibberellin-regulated protein 5 [0.005] | Gibberellin-regulated protein 4 [0.003] | Flavonoid 3'-hydroxylase [0.003] | Snakin-1 [0.003] | Sn…	Gibberellin-regulated family protein | GAST1 protein homolog 2 | GAST1 protein homolog 4 | GAST1 protein homolog 5 | GAST1 protein homolog 3 | GAST1 protein homolog 1	Gibberellin regulated protein (PF02704) [0.997] | Cytochrome P450 (PF00067) [0.003]	Gibberellin regulated protein (IPR003854) [0.997] | Cytochrome P450 (IPR001128) [0.003]	oxidoreductase activity, acting on paired donors, with incorporation or reduction of molecular oxygen (GO:0016705) [0.003] | heme binding (GO:0020037) [0.003] | iron ion binding (GO:0005506) [0.003]	oxidation-reduction process (GO:0055114) [0.003]	NULL / Representative annotation below 0.1%
OG118	35	115	14	11	11	42	13	6	6	1	7	6	6	7	2	5	24	12	13	7	6	6	2	2	4	0	15	3	4	7	5	95	41	82	267	260	MADS-box transcription factor family protein [0.416] | Mads box protein, putative [0.231] | Agamous-like MADS-box protein AGL80 [0.157] | MADS-box family protein [0.030] | MADS-box transcription factor [0.028] | MADS-box protein AGL82 [0.019] | Agamous-like MADS-box protein [0.014] | Agamous-like MADS-box protein AGL36 [0.011] | MADS-box protein AGL83 [0.011] | Agamous-like MADS-box protein AGL35…	MADS-box transcription factor family protein | MADS-box family protein | AGAMOUS-like 51 | AGAMOUS-like 80 | AGAMOUS-like 36 | AGAMOUS-like 54 | AGAMOUS-like 105 | AGAMOUS-like 52 | AGAMOUS-like 76 | AGAMOUS-like 53 | AGAMOUS-like 81 | AGAMOUS-like 43 | AGAMOUS-like 93 | AGAMOUS-like 96 | AGAMOUS-like 90 | AGAMOUS-like 77 | AGAMOUS-like 103 | AGAMOUS-like 101 | AGAMOUS-like 78 | AGAMOUS-like 46 |…	SRF-type transcription factor (DNA-binding and dimerisation domain) (PF00319) [0.860]	Transcription factor, MADS-box (IPR002100) [0.860]	DNA binding (GO:0003677) [0.860] | protein dimerization activity (GO:0046983) [0.860]	NULL / Representative annotation below 0.1%	NULL / Representative annotation below 0.1%
OG119	13	3	10	16	6	20	6	16	13	4	17	6	13	13	14	10	16	44	43	22	20	5	7	14	11	1	6	33	36	30	591	577	1225	1227	1755	1784	GDSL esterase/lipase [0.675] | GDSL-lipase [0.171] | GDSL-like Lipase/Acylhydrolase superfamily protein [0.061] | GDSL-like Lipase/Acylhydrolase family protein, expressed [0.019] | GDSL esterase/lipase At5g45910 [0.011] | GDSL esterase/lipase At5g03980 [0.011] | GDSL esterase/lipase At1g28590 [0.008] | GDSL esterase/lipase At1g28640 [0.008] | GDSL esterase/lipase At2g27360 [0.006] | GDSL-like Lip…	GDSL-like Lipase/Acylhydrolase superfamily protein | SGNH hydrolase-type esterase superfamily protein	GDSL-like Lipase/Acylhydrolase (PF00657) [0.851] | Disordered region downstream of MFMR (PF16596) [0.003] | SWIB/MDM2 domain (PF02201) [0.003] | bZIP transcription factor (PF00170) [0.003] | Thiamine pyrophosphate enzyme, N-terminal TPP binding domain (PF02776) [0.003]	GDSL lipase/esterase (IPR001087) [0.851] | SWIB/MDM2 domain (IPR003121) [0.003] | Basic-leucine zipper domain (IPR004827) [0.003] | Thiamine pyrophosphate enzyme, N-terminal TPP-binding domain (IPR012001) [0.003]	hydrolase activity, acting on ester bonds (GO:0016788) [0.851] | sequence-specific DNA binding (GO:0043565) [0.003] | thiamine pyrophosphate binding (GO:0030976) [0.003] | protein binding (GO:0005515) [0.003] | transcription factor activity, sequence-specific DNA binding (GO:0003700) [0.003]	regulation of transcription, DNA-templated (GO:0006355) [0.003]	NULL / Representative annotation below 0.1%
OG120	13	2	14	33	17	31	12	12	11	15	6	4	7	7	16	10	27	11	6	37	9	7	6	34	12	2	24	256	7	6	1079	668	669	656	646	650	O-methyltransferase [0.296] | Caffeic acid O-methyltransferase [0.288] | O-methyltransferase-like protein [0.150] | O-methyltransferase family protein [0.125] | O-methyltransferase, putative [0.102] | Caffeic acid 3-O-methyltransferase [0.011] | Eugenol O-methyltransferase [0.008] | O-methyltransferase family protein, expressed [0.006] | Eugenol O-methyltransferase family protein [0.003] | Caffei…	O-methyltransferase family protein | S-adenosyl-L-methionine-dependent methyltransferases superfamily protein | O-methyltransferase 1	O-methyltransferase (PF00891) [0.950] | Dimerisation domain (PF08100) [0.789]	O-methyltransferase, family 2 (IPR001077) [0.950] | Plant methyltransferase dimerisation (IPR012967) [0.789]	O-methyltransferase activity (GO:0008171) [0.950] | protein dimerization activity (GO:0046983) [0.789]	NULL / Representative annotation below 0.1%	NULL / Representative annotation below 0.1%
OG121	10	11	14	15	17	15	11	17	25	13	19	14	8	10	8	13	7	16	15	36	23	8	7	5	8	15	70	80	61	63	86	1895	1991	2059	2105	2146	Homeodomain-like superfamily protein [0.808] | Myb family transcription factor family protein [0.069] | Transcription factor, putative [0.022] | KANADI like transcription factor [0.017] | Myb family transcription factor-like [0.014] | Myb family transcription factor APL [0.011] | Myb family transcription factor-like protein [0.008] | myb-like HTH transcriptional regulator family protein [0.006] |…	Homeodomain-like superfamily protein | myb-like HTH transcriptional regulator family protein	Myb-like DNA-binding domain (PF00249) [0.878] | MYB-CC type transfactor, LHEQLE motif (PF14379) [0.006]	SANT/Myb domain (IPR001005) [0.878] | MYB-CC type transcription factor, LHEQLE-containing domain (IPR025756) [0.006]	NULL / Representative annotation below 0.1%	NULL / Representative annotation below 0.1%	NULL / Representative annotation below 0.1%
OG122	23	11	12	14	20	19	13	20	24	13	19	21	18	15	11	8	13	8	7	15	5	6	6	17	3	12	38	74	120	142	113	93	74	65	53	54	Pectate lyase family protein [0.414] | Pectin lyase-like superfamily protein [0.255] | Pectate lyase, putative [0.184] | Pectate lyase [0.122] | Pectate lyase homolog [0.014] | Pectate lyase-like protein [0.006] | Pectate lyase 12 [0.003] | Pectate lyase-like protein 1 [0.003]	Pectin lyase-like superfamily protein | Pectate lyase family protein | root hair specific 14	Pectate lyase (PF00544) [0.994] | Pectate lyase, N terminus (PF04431) [0.221] | Homeobox domain (PF00046) [0.003] | Homeobox associated leucine zipper (PF02183) [0.003] | Cleavage site for pathogenic type III effector avirulence factor Avr (PF05627) [0.003]	Pectate lyase/Amb allergen (IPR002022) [0.952] | Pectate lyase, N-terminal (IPR007524) [0.221] | Pectate lyase (IPR002022) [0.042] | RIN4, pathogenic type III effector avirulence factor Avr cleavage site (IPR008700) [0.003] | Homeobox domain (IPR001356) [0.003] | Leucine zipper, homeobox-associated (IPR003106) [0.003]	pectate lyase activity (GO:0030570) [0.221] | transcription factor activity, sequence-specific DNA binding (GO:0003700) [0.003] | sequence-specific DNA binding (GO:0043565) [0.003] | DNA binding (GO:0003677) [0.003]	regulation of transcription, DNA-templated (GO:0006355) [0.003]	NULL / Representative annotation below 0.1%
OG123	18	6	9	47	10	16	17	11	16	10	11	4	5	5	16	14	15	30	8	10	6	17	14	12	12	7	141	1	1	59	34	21	15	393	375	367	Pathogenesis-related protein 1 [0.607] | CAP (Cysteine-rich secretory proteins, Antigen 5, and Pathogenesis-related 1 protein) superfamily protein [0.153] | pathogenesis-related gene 1 [0.142] | Pathogenesis-related 1 protein [0.017] | Pathogenesis-related protein PR-1 [0.014] | pathogenesis-related protein-1-like [0.012] | Pathogenesis related protein-1 [0.009] | Pathogenesis-related family prot…	CAP (Cysteine-rich secretory proteins, Antigen 5, and Pathogenesis-related 1 protein) superfamily protein | pathogenesis-related protein-1-like | basic pathogenesis-related protein 1 | pathogenesis-related gene 1	Cysteine-rich secretory protein family (PF00188) [1.000]	CAP domain (IPR014044) [1.000]	NULL / Representative annotation below 0.1%	NULL / Representative annotation below 0.1%	NULL / Representative annotation below 0.1%
OG124	10	9	16	20	14	22	22	15	15	21	10	6	15	13	14	10	22	10	9	12	9	3	8	22	15	4	6	33	36	30	29	26	23	17	19	18	GDSL esterase/lipase [0.925] | GDSL-like Lipase/Acylhydrolase superfamily protein [0.032] | GDSL esterase/lipase At5g14450 [0.012] | GDSL esterase/lipase At4g01130 [0.009] | GDSL esterase/lipase LIP-4 [0.006] | GDSL esterase/lipase At1g09390 [0.006] | GDSL esterase/lipase At3g27950 [0.003] | GDSL esterase/lipase At3g62280 [0.003] | GDSL esterase/lipase At3g05180 [0.003] | GDSL esterase/lipase At3…	GDSL-like Lipase/Acylhydrolase superfamily protein | alpha-fucosidase 1	GDSL-like Lipase/Acylhydrolase (PF00657) [0.954]	GDSL lipase/esterase (IPR001087) [0.954]	hydrolase activity, acting on ester bonds (GO:0016788) [0.954]	NULL / Representative annotation below 0.1%	NULL / Representative annotation below 0.1%
OG125	15	8	12	13	16	14	12	18	16	12	16	21	17	15	11	11	10	18	15	26	14	10	8	8	4	5	1	1	1	1	158	131	116	106	124	1406	Protein kinase [0.446] | Kinase family protein [0.125] | Protein kinase-like protein [0.101] | Protein kinase like protein [0.096] | Protein kinase superfamily protein [0.067] | Protein kinase G11A [0.041] | Serine/threonine protein kinase, putative [0.038] | Protein kinase, putative, expressed [0.032] | Protein kinase PINOID [0.009] | Protein kinase PVPK-1 [0.006] | Protein kinase PINOID 2 [0.00…	Protein kinase superfamily protein | AGC kinase 1.7 | AGC (cAMP-dependent, cGMP-dependent and protein kinase C) kinase family protein | root hair specific 3 | AGC kinase 1.5 | D6 protein kinase like 2 | D6 protein kinase | KCBP-interacting protein kinase | D6 protein kinase like 1	Protein kinase domain (PF00069) [0.994] | Keratin, high sulfur B2 protein (PF13885) [0.003]	Protein kinase domain (IPR000719) [0.994] | Keratin-associated protein (IPR002494) [0.003]	protein kinase activity (GO:0004672) [0.994] | ATP binding (GO:0005524) [0.994]	protein phosphorylation (GO:0006468) [0.994]	keratin filament (GO:0045095) [0.003]
OG126	29	10	12	26	23	17	14	36	14	12	35	4	19	11	24	5	17	2	1	2	2	0	2	11	6	11	5	362	410	485	474	547	543	537	522	510	Polyketide cyclase/dehydrase and lipid transport superfamily protein [0.820] | MLP-like protein [0.029] | Intracellular pathogenesis-related protein-like protein [0.029] | Pollen allergen-like protein [0.023] | Ripening induced protein [0.023] | MLP [0.012] | MLP-like protein 28 [0.009] | Major latex-like protein [0.009] | Ripening related protein [0.006] | Major latex protein, putative [0.003] |…	Polyketide cyclase/dehydrase and lipid transport superfamily protein | MLP-like protein 31 | MLP-like protein 43 | MLP-like protein 423 | MLP-like protein 165 | MLP-like protein 28 | MLP-like protein 168 | MLP-like protein 329 | MLP-like protein 328 | MLP-like protein 34	Pathogenesis-related protein Bet v I family (PF00407) [0.977] | Polyketide cyclase / dehydrase and lipid transport (PF10604) [0.020] | Glutaredoxin (PF00462) [0.003] | Reverse transcriptase-like (PF13456) [0.003]	Bet v I/Major latex protein (IPR000916) [0.977] | Polyketide cyclase/dehydrase (IPR019587) [0.020] | Glutaredoxin (IPR002109) [0.003]	protein disulfide oxidoreductase activity (GO:0015035) [0.003] | electron carrier activity (GO:0009055) [0.003]	defense response (GO:0006952) [0.977] | response to biotic stimulus (GO:0009607) [0.977] | cell redox homeostasis (GO:0045454) [0.003]	NULL / Representative annotation below 0.1%
OG127	0	2	20	95	22	16	24	13	22	16	8	4	12	5	7	7	12	6	7	5	10	2	3	19	4	3	5	243	323	315	892	901	909	895	895	895	Major allergen Mal d 1 [0.209] | Major allergen Pru ar 1 [0.203] | Pathogenesis-related protein 1 [0.122] | Class-10 pathogenesis-related protein 1 [0.090] | Major allergen Pru av 1 [0.081] | Major allergen Mal d 1 family protein [0.044] | Major pollen allergen Aln g 1 [0.026] | PR10 protein [0.023] | Pathogenesis-related protein [0.015] | Pathogenesis-related protein 10.1 [0.015] | Major allerge…	Unkown protein(s) / No TAIR description(s)	Pathogenesis-related protein Bet v I family (PF00407) [0.939] | Polyketide cyclase / dehydrase and lipid transport (PF10604) [0.015] | Dip2/Utp12 Family (PF04003) [0.003] | Demethylmenaquinone methyltransferase (PF03737) [0.003]	Bet v I/Major latex protein (IPR000916) [0.939] | Polyketide cyclase/dehydrase (IPR019587) [0.015] | Small-subunit processome, Utp12 (IPR007148) [0.003] | Ribonuclease E inhibitor RraA/RraA-like protein (IPR005493) [0.003]	NULL / Representative annotation below 0.1%	defense response (GO:0006952) [0.939] | response to biotic stimulus (GO:0009607) [0.939]	NULL / Representative annotation below 0.1%
OG128	19	8	10	22	14	10	28	81	17	11	10	7	14	10	14	11	15	8	8	7	1	3	13	2	0	0	1	42	98	98	101	110	99	126	149	160	Pectin lyase-like superfamily protein [0.997] | Pectin lyase superfamily protein [0.003]	Pectin lyase-like superfamily protein | polygalacturonase 4	Glycosyl hydrolases family 28 (PF00295) [0.994] | D-mannose binding lectin (PF01453) [0.003] | Pectate lyase superfamily protein (PF12708) [0.003] | Protein tyrosine kinase (PF07714) [0.003] | PAN-like domain (PF08276) [0.003]	Glycoside hydrolase, family 28 (IPR000743) [0.994] | Bulb-type lectin domain (IPR001480) [0.003] | Pectate lyase superfamily protein (IPR024535) [0.003] | Serine-threonine/tyrosine-protein kinase, catalytic domain (IPR001245) [0.003] | PAN/Apple domain (IPR003609) [0.003]	polygalacturonase activity (GO:0004650) [0.994] | protein kinase activity (GO:0004672) [0.003]	carbohydrate metabolic process (GO:0005975) [0.994] | protein phosphorylation (GO:0006468) [0.003]	NULL / Representative annotation below 0.1%
OG129	1	3	20	54	9	18	30	22	41	12	15	1	4	3	12	23	7	14	7	8	17	1	18	0	0	0	1	1	1	1	2	1	1	1	1	1	Kinase-like protein [0.424] | Serine/threonine-protein kinase [0.297] | G-type lectin S-receptor-like serine/threonine-protein kinase RLK1 [0.071] | Receptor like kinase [0.038] | receptor-like protein kinase 1 [0.035] | G-type lectin receptor kinase [0.035] | Receptor-like protein kinase [0.026] | lectin protein kinase family protein [0.018] | S-locus lectin protein kinase family protein [0.012]…	receptor-like protein kinase 1	D-mannose binding lectin (PF01453) [0.856] | Protein kinase domain (PF00069) [0.741] | S-locus glycoprotein domain (PF00954) [0.256] | Protein tyrosine kinase (PF07714) [0.109] | PAN-like domain (PF08276) [0.059] | Thaumatin family (PF00314) [0.009] | Domain of unknown function (DUF3403) (PF11883) [0.006] | Reverse transcriptase-like (PF13456) [0.003] | NB-ARC domain (PF00931) [0.003] | Voltage g…	Bulb-type lectin domain (IPR001480) [0.856] | Protein kinase domain (IPR000719) [0.741] | S-locus glycoprotein domain (IPR000858) [0.256] | Serine-threonine/tyrosine-protein kinase, catalytic domain (IPR001245) [0.109] | PAN/Apple domain (IPR003609) [0.059] | Thaumatin (IPR001938) [0.009] | S-locus receptor kinase, C-terminal (IPR021820) [0.006] | NB-ARC (IPR002182) [0.003] | Chloride channel, vo…	protein kinase activity (GO:0004672) [0.829] | ATP binding (GO:0005524) [0.741] | protein serine/threonine kinase activity (GO:0004674) [0.006] | voltage-gated chloride channel activity (GO:0005247) [0.003] | ADP binding (GO:0043531) [0.003]	protein phosphorylation (GO:0006468) [0.829] | recognition of pollen (GO:0048544) [0.256] | transmembrane transport (GO:0055085) [0.003] | chloride transport (GO:0006821) [0.003]	membrane (GO:0016020) [0.003]
OG131	9	11	15	9	22	19	11	22	26	6	13	14	14	14	13	9	12	17	23	18	16	6	14	1	2	0	44	131	139	133	1908	2056	2196	2300	2379	2448	Zinc finger protein, putative [0.539] | Zinc finger family protein [0.146] | Zinc finger protein [0.140] | C2H2-like zinc finger protein [0.042] | Zinc finger protein 2 [0.021] | Zinc finger protein 3 [0.018] | Zinc finger protein KNUCKLES [0.015] | Zinc finger protein 7 [0.015] | zinc finger protein 2 [0.009] | Zinc finger protein 1 [0.006] | C2H2 zinc finger malformed spikelet [0.006] | Zinc fi…	C2H2 and C2HC zinc fingers superfamily protein | zinc-finger protein 1 | zinc finger protein 3 | C2H2-like zinc finger protein | zinc finger protein 2 | zinc finger protein 4 | zinc finger protein 7	C2H2-type zinc finger (PF13912) [0.092] | Zinc-finger double-stranded RNA-binding (PF12171) [0.003] | Reverse transcriptase (RNA-dependent DNA polymerase) (PF07727) [0.003]	Zinc finger, double-stranded RNA binding (IPR022755) [0.003] | Reverse transcriptase, RNA-dependent DNA polymerase (IPR013103) [0.003]	NULL / Representative annotation below 0.1%	NULL / Representative annotation below 0.1%	NULL / Representative annotation below 0.1%
OG132	15	11	11	12	14	19	12	20	20	5	12	20	11	12	9	16	8	13	12	24	23	9	8	8	4	6	13	48	50	52	516	425	418	406	385	376	AT-hook DNA-binding protein [0.671] | AT hook motif DNA-binding family protein [0.329]	Predicted AT-hook DNA-binding family protein | AT-hook protein of GA feedback 2 | AT-hook motif nuclear-localized protein 20 | AT-hook motif nuclear-localized protein 19 | AT-hook protein of GA feedback 1 | AT-hook motif nuclear-localized protein 18 | AT-hook motif nuclear-localized protein 22	Domain of unknown function (DUF296) (PF03479) [0.997] | Nucleotide hydrolase (PF13869) [0.003] | CAAD domains of cyanobacterial aminoacyl-tRNA synthetase (PF14159) [0.003]	PPC domain (IPR005175) [0.997] | Cyanobacterial aminoacyl-tRNA synthetase, CAAD domain (IPR025564) [0.003] | Cleavage/polyadenylation specificity factor subunit 5 (IPR016706) [0.003]	mRNA binding (GO:0003729) [0.003]	mRNA polyadenylation (GO:0006378) [0.003]	mRNA cleavage factor complex (GO:0005849) [0.003]
OG133	14	8	10	18	14	15	11	19	20	16	14	10	23	14	11	15	11	14	14	20	2	6	7	7	5	16	1	1	1	1	2	1	1	991	564	452	Leucine-rich repeat receptor-like kinase [0.204] | Leucine-rich repeat protein kinase family protein [0.153] | BRI1-associated receptor kinase [0.135] | Receptor-like protein kinase [0.099] | Protein kinase [0.075] | NSP-interacting kinase 1 [0.060] | Receptor kinase-like protein [0.054] | Receptor-like kinase [0.033] | Plasma membrane receptor-like kinase [0.021] | NSP-interacting kinase [0.018]…	Leucine-rich repeat protein kinase family protein | NSP-interacting kinase 3 | somatic embryogenesis receptor-like kinase 1 | NSP-interacting kinase 1 | BRI1-associated receptor kinase | somatic embryogenesis receptor-like kinase 4 | NSP-interacting kinase 2 | somatic embryogenesis receptor-like kinase 5 | somatic embryogenesis receptor-like kinase 2 | leucine-rich repeat transmembrane protein ki…	Protein kinase domain (PF00069) [0.868] | Leucine rich repeat N-terminal domain (PF08263) [0.838] | Leucine rich repeat (PF13855) [0.482] | Leucine Rich Repeat (PF00560) [0.165] | Protein tyrosine kinase (PF07714) [0.108] | Leucine Rich repeats (2 copies) (PF12799) [0.042] | Leucine Rich repeat (PF13516) [0.003] | NB-ARC domain (PF00931) [0.003] | Stigma-specific protein, Stig1 (PF04885) [0.003] …	Protein kinase domain (IPR000719) [0.868] | Leucine-rich repeat-containing N-terminal, plant-type (IPR013210) [0.838] | Leucine-rich repeat (IPR001611) [0.632] | Serine-threonine/tyrosine-protein kinase, catalytic domain (IPR001245) [0.108] | Leucine rich repeat 4 (IPR025875) [0.042] | Stigma-specific protein Stig1 (IPR006969) [0.003] | Pectinesterase, catalytic (IPR000070) [0.003] | NB-ARC (IPR0…	protein kinase activity (GO:0004672) [0.964] | ATP binding (GO:0005524) [0.868] | protein binding (GO:0005515) [0.632] | pectinesterase activity (GO:0030599) [0.003] | ADP binding (GO:0043531) [0.003]	protein phosphorylation (GO:0006468) [0.964] | cell wall modification (GO:0042545) [0.003]	cell wall (GO:0005618) [0.003]
OG134	14	11	9	13	12	12	10	15	18	9	12	12	12	10	6	10	8	22	27	33	14	12	5	21	2	2	11	13	12	9	13	11	17	709	549	542	Concanavalin A-like lectin protein kinase family protein [0.003] | DNA replication and repair protein RecF [0.003] | DNA gyrase inhibitor YacG [0.003] | Ribosomal RNA large subunit methyltransferase K/L [0.003]	Protein of unknown function (DUF581)	zinc-finger of the FCS-type, C2-C2 (PF04570) [0.982]	Zf-FLZ domain (IPR007650) [0.982]	NULL / Representative annotation below 0.1%	NULL / Representative annotation below 0.1%	NULL / Representative annotation below 0.1%
OG135	5	5	13	38	9	7	18	8	38	25	14	13	7	7	3	7	16	11	13	11	14	9	12	15	5	6	1	2	2	2	1	2	4	1026	1023	753	Patatin-like protein [0.666] | Patatin family protein [0.091] | Patatin-like family protein [0.091] | Patatin, putative [0.076] | Patatin group A-3 [0.015] | PATATIN-like protein 5 [0.015] | Patatin-like protein 3 [0.009] | Patatin [0.009] | Patatin-like protein 1 [0.006] | Patatin-like phospholipase family protein, expressed [0.003] | Patatin-like phospholipase family protein [0.003] | phospholi…	Acyl transferase/acyl hydrolase/lysophospholipase superfamily protein | PATATIN-like protein 4 | PATATIN-like protein 5 | phospholipase A 2A	Patatin-like phospholipase (PF01734) [0.897] | PPR repeat family (PF13041) [0.003] | PPR repeat (PF01535) [0.003]	Patatin-like phospholipase domain (IPR002641) [0.897] | Pentatricopeptide repeat (IPR002885) [0.003]	NULL / Representative annotation below 0.1%	lipid metabolic process (GO:0006629) [0.897]	NULL / Representative annotation below 0.1%
OG136	12	10	11	10	13	13	12	25	22	11	12	12	15	11	17	15	9	13	14	25	1	8	4	3	8	23	60	16	27	40	39	437	138	111	106	124	ADP-ribosylation factor [0.647] | ADP-ribosylation factor family protein [0.228] | ADP-ribosylation factor, putative [0.079] | ADP-ribosylation factor, putative, expressed [0.012] | ADP-ribosylation factor-like protein [0.009] | ADP ribosylation factor-like protein [0.009] | ADP-ribosylation factor family [0.006] | ADP ribosylation factor [0.003] | Adp-ribosylation factor [0.003] | ADP-ribosylati…	Ras-related small GTP-binding family protein | ADP-ribosylation factor C1 | ADP-ribosylation factor A1B | ADP-ribosylation factor B1C | ADP-ribosylation factor A1E | ADP-ribosylation factor A1F | ADP-ribosylation factor 1 | ADP-ribosylation factor family protein | ADP-ribosylation factor B1B | ADP-ribosylation factor B1A | ADP-ribosylation factor 3	ADP-ribosylation factor family (PF00025) [1.000] | EamA-like transporter family (PF00892) [0.003]	Small GTPase superfamily, ARF/SAR type (IPR006689) [1.000] | EamA domain (IPR000620) [0.003]	GTP binding (GO:0005525) [1.000]	NULL / Representative annotation below 0.1%	integral component of membrane (GO:0016021) [0.003] | membrane (GO:0016020) [0.003]
OG137	10	10	14	38	13	16	17	18	23	12	11	10	18	9	11	17	7	13	13	13	9	6	3	6	5	5	4	18	40	46	148	170	166	298	276	266	Calcium ATPase [0.315] | calcium-transporting ATPase, putative [0.300] | Calcium-transporting ATPase 8 family protein [0.113] | Ca2+-transporting ATPase [0.083] | Ca2+-transporting ATPase like protein [0.070] | calcium ATPase 2 [0.040] | Cation-transporting atpase plant, putative [0.024] | Plasma membrane calcium-transporting ATPase [0.009] | Type IIB calcium ATPase [0.006] | Autoinhibited calciu…	ATPase E1-E2 type family protein / haloacid dehalogenase-like hydrolase family protein | autoinhibited Ca(2+)-ATPase 9 | Cation transporter/ E1-E2 ATPase family protein | autoinhibited Ca(2+)-ATPase, isoform 4 | autoinhibited Ca2+ -ATPase, isoform 8 | autoinhibited Ca2+-ATPase 11 | autoinhibited Ca(2+)-ATPase 10 | autoinhibited Ca2+-ATPase 1 | calcium ATPase 2	E1-E2 ATPase (PF00122) [0.908] | Cation transporting ATPase, C-terminus (PF00689) [0.865] | Cation transporter/ATPase, N-terminus (PF00690) [0.823] | haloacid dehalogenase-like hydrolase (PF00702) [0.688] | Ca2+-ATPase N terminal autoinhibitory domain (PF12515) [0.495] | Cation transport ATPase (P-type) (PF13246) [0.266] | haloacid dehalogenase-like hydrolase (PF08282) [0.055] | No apical meriste…	P-type ATPase, A domain (IPR008250) [0.881] | Cation-transporting P-type ATPase, C-terminal (IPR006068) [0.865] | Cation-transporting P-type ATPase, N-terminal (IPR004014) [0.823] | Calcium-transporting P-type ATPase, N-terminal autoinhibitory domain (IPR024750) [0.495] | HAD-like domain (IPR023214) [0.055] | Ribosome biogenesis protein Nop53/GLTSCR2 (IPR011687) [0.003] | No apical meristem-assoc…	metal ion binding (GO:0046872) [0.881] | nucleotide binding (GO:0000166) [0.881] | calmodulin binding (GO:0005516) [0.495]	NULL / Representative annotation below 0.1%	NULL / Representative annotation below 0.1%
OG138	8	11	9	12	14	14	9	16	20	13	26	13	10	9	7	11	8	17	18	27	4	10	7	5	7	17	1	1	1	1	2	1	1	1	1388	1407	Kinase family protein [0.320] | Protein kinase, putative [0.286] | Protein kinase superfamily protein [0.118] | Protein kinase [0.096] | Fibroblast growth factor receptor [0.034] | HT1 protein kinase [0.034] | Bifunctional uridylyltransferase/uridylyl-removing enzyme [0.028] | Protein kinase like protein [0.022] | Protein kinase family protein [0.019] | Protein kinase family protein, putative, ex…	Protein kinase superfamily protein | ACT-like protein tyrosine kinase family protein	Protein tyrosine kinase (PF07714) [0.944] | ACT domain (PF01842) [0.090] | Protein kinase domain (PF00069) [0.016] | Glutathione S-transferase, N-terminal domain (PF02798) [0.003]	Serine-threonine/tyrosine-protein kinase, catalytic domain (IPR001245) [0.944] | ACT domain (IPR002912) [0.090] | Protein kinase domain (IPR000719) [0.016] | Glutathione S-transferase, N-terminal (IPR004045) [0.003]	protein kinase activity (GO:0004672) [0.957] | amino acid binding (GO:0016597) [0.087] | ATP binding (GO:0005524) [0.016] | protein binding (GO:0005515) [0.003]	protein phosphorylation (GO:0006468) [0.957] | metabolic process (GO:0008152) [0.087]	NULL / Representative annotation below 0.1%
OG139	18	9	16	16	17	20	9	22	20	5	17	8	15	12	8	15	7	9	8	12	15	7	8	24	1	2	78	69	65	95	95	99	105	96	103	97	Plant invertase/pectin methylesterase inhibitor superfamily protein [0.953] | Pectinesterase [0.016] | Plant invertase/pectin methylesterase inhibitor superfamily [0.016] | Plant invertase/pectin methylesterase inhibitor family protein, expressed [0.006] | 3-oxoacyl-[acyl-carrier-protein] synthase, putative [0.003] | D-mannose binding lectin protein with Apple-like carbohydrate-binding domain [0.…	Plant invertase/pectin methylesterase inhibitor superfamily protein | pectin methylesterase inhibitor 1	Plant invertase/pectin methylesterase inhibitor (PF04043) [0.988] | Pectinesterase (PF01095) [0.013] | Beta-ketoacyl synthase, N-terminal domain (PF00109) [0.003] | Zinc-ribbon (PF14599) [0.003]	Pectinesterase inhibitor domain (IPR006501) [0.988] | Pectinesterase, catalytic (IPR000070) [0.013] | Beta-ketoacyl synthase, N-terminal (IPR014030) [0.003]	enzyme inhibitor activity (GO:0004857) [0.988] | pectinesterase activity (GO:0030599) [0.013]	cell wall modification (GO:0042545) [0.013]	cell wall (GO:0005618) [0.013]
OG140	5	12	12	28	15	51	31	19	11	4	25	2	12	9	10	8	35	8	8	1	2	1	2	1	0	7	6	8	49	51	SINGLETON	SINGLETON	SINGLETON	SINGLETON	SINGLETON	SINGLETON	B3 domain-containing protein [0.740] | Transcriptional factor B3 family protein [0.078] | B3 domain-containing transcription factor VRN1 [0.056] | AP2/B3-like transcriptional factor family protein [0.050] | transcriptional factor B3 family protein [0.016] | Transcriptional factor B3 [0.013] | B3 domain-containing protein REM19 [0.009] | B3 domain-containing protein Os08g0324300 [0.006] | Nuclear …	AP2/B3-like transcriptional factor family protein | related to vernalization1 1	B3 DNA binding domain (PF02362) [0.918] | Apocytochrome F, N-terminal (PF16639) [0.003]	B3 DNA binding domain (IPR003340) [0.918] | Cytochrome f large domain (IPR024094) [0.003]	DNA binding (GO:0003677) [0.918]	NULL / Representative annotation below 0.1%	NULL / Representative annotation below 0.1%
OG142	9	10	19	23	14	17	11	10	10	20	11	2	14	7	15	13	16	26	12	17	6	8	10	13	0	0	5	70	257	234	217	200	190	181	169	168	S-adenosyl-L-methionine-dependent methyltransferases superfamily protein [0.508] | S-adenosyl-L-methionine:carboxyl methyltransferase family protein [0.236] | S-adenosyl-L-methionine:salicylic acid carboxyl methyltransferase [0.150] | S-adenosyl-L-methionine:carboxyl methyltransferase [0.048] | S-adenosyl-L-methionine:salicylic acid methyltransferase [0.032] | S-adenosyl-L-methionine: salicylic a…	S-adenosyl-L-methionine-dependent methyltransferases superfamily protein | jasmonic acid carboxyl methyltransferase	SAM dependent carboxyl methyltransferase (PF03492) [1.000]	SAM dependent carboxyl methyltransferase (IPR005299) [1.000]	methyltransferase activity (GO:0008168) [1.000]	NULL / Representative annotation below 0.1%	NULL / Representative annotation below 0.1%
OG143	16	17	17	19	12	11	11	14	12	7	27	11	10	10	9	15	17	11	14	10	11	2	9	14	6	0	23	486	792	830	871	697	694	684	678	674	Purine permease family protein [0.359] | Purine permease [0.359] | Purine permease-related family protein [0.163] | purine permease 11 [0.032] | purine permease 10 [0.013] | purine permease 3 [0.010] | purine permease 1 [0.010] | purine permease 2 [0.010] | purine permease 7 [0.006] | purine permease 12 [0.006] | PURINE PERMEASE 1 family protein [0.003] | Purine permease 4-like protein [0.003] | …	Drug/metabolite transporter superfamily protein | purine permease 2 | purine permease 5 | purine permease 1 | purine permease 3 | purine permease 8 | purine permease 12 | purine permease 15 | purine permease 10 | purine permease 11 | purine permease 7 | purine permease 6 | purine permease 14 | purine permease 4 | Nucleotide-sugar transporter family protein	Purine nucleobase transmembrane transport (PF16913) [1.000] | Kelch motif (PF01344) [0.006] | 10 TM Acyl Transferase domain found in Cas1p (PF07779) [0.003]	Kelch repeat type 1 (IPR006652) [0.006] | Cas1p 10 TM acyl transferase domain (IPR012419) [0.003]	protein binding (GO:0005515) [0.006]	NULL / Representative annotation below 0.1%	NULL / Representative annotation below 0.1%
OG144	22	4	7	46	8	16	15	16	14	16	22	6	4	3	11	3	16	20	14	6	8	7	12	13	0	2	11	13	12	9	13	11	17	25	43	48	Serine carboxypeptidase, putative [0.669] | Serine carboxypeptidase-like protein [0.145] | Serine carboxypeptidase family protein, expressed [0.042] | Serine carboxypeptidase [0.035] | Serine carboxypeptidase family protein [0.029] | Serine carboxypeptidase 1 [0.019] | serine carboxypeptidase-like 15 [0.003] | serine carboxypeptidase-like 10 [0.003] | serine carboxypeptidase-like 11 [0.003] | ser…	serine carboxypeptidase-like 7 | serine carboxypeptidase-like 3 | serine carboxypeptidase-like 6 | serine carboxypeptidase-like 18 | serine carboxypeptidase-like 20 | serine carboxypeptidase-like 12 | serine carboxypeptidase-like 5 | serine carboxypeptidase-like 21 | serine carboxypeptidase-like 16 | serine carboxypeptidase-like 11 | serine carboxypeptidase-like 17 | serine carboxypeptidase-like …	Serine carboxypeptidase (PF00450) [1.000] | Glycosyl hydrolases family 17 (PF00332) [0.003]	Peptidase S10, serine carboxypeptidase (IPR001563) [1.000] | Glycoside hydrolase family 17 (IPR000490) [0.003]	serine-type carboxypeptidase activity (GO:0004185) [1.000] | hydrolase activity, hydrolyzing O-glycosyl compounds (GO:0004553) [0.003]	proteolysis (GO:0006508) [1.000] | carbohydrate metabolic process (GO:0005975) [0.003]	NULL / Representative annotation below 0.1%
OG145	6	5	8	51	17	14	9	14	19	14	7	3	5	7	3	10	6	9	6	7	20	3	11	55	2	0	55	16	47	53	788	783	784	761	2106	2147	Isoflavone reductase-like protein [0.389] | Isoflavone reductase, putative [0.177] | Leucoanthocyanidin reductase [0.103] | Isoflavone reductase related protein [0.077] | Isoflavone reductase family protein [0.051] | Isoflavone reductase [0.042] | Isoflavone reductase homolog [0.032] | Pinoresinol-lariciresinol reductase [0.026] | NmrA-like negative transcriptional regulator family protein [0.013…	NmrA-like negative transcriptional regulator family protein | NAD(P)-binding Rossmann-fold superfamily protein	NmrA-like family (PF05368) [0.965] | NAD(P)H-binding (PF13460) [0.003] | NAD-specific glutamate dehydrogenase (PF10712) [0.003]	NmrA-like domain (IPR008030) [0.965] | Glutamate dehydrogenase, NAD-specific (IPR019651) [0.003] | NAD(P)-binding domain (IPR016040) [0.003]	NULL / Representative annotation below 0.1%	NULL / Representative annotation below 0.1%	NULL / Representative annotation below 0.1%
OG146	15	10	13	14	13	15	14	16	21	10	16	7	24	15	9	12	9	11	8	12	8	7	10	15	0	7	78	979	1207	1330	SINGLETON	2137	2282	2395	2480	2555	Casparian strip membrane protein 1 [0.232] | CASP-like protein RCOM_1174750 [0.064] | CASP-like protein VIT_17s0000g00560 [0.048] | CASP-like protein VIT_05s0020g01820 [0.042] | CASP-like protein POPTRDRAFT_798217 [0.039] | Uncharacterised protein family (UPF0497) [0.039] | CASP-like protein 6 [0.032] | CASP-like protein POPTRDRAFT_820933 [0.032] | CASP-like protein RCOM_1446020 [0.023] | CASP-li…	Uncharacterised protein family (UPF0497)	Domain of unknown function (DUF588) (PF04535) [0.990] | Synaptobrevin (PF00957) [0.003]	Domain of unknown function DUF588 (IPR006702) [0.990] | Synaptobrevin (IPR001388) [0.003]	NULL / Representative annotation below 0.1%	vesicle-mediated transport (GO:0016192) [0.003]	integral component of membrane (GO:0016021) [0.003]
OG147	8	10	7	20	16	27	12	13	19	16	7	4	12	9	10	15	11	18	21	17	8	6	8	9	4	2	2	6	22	17	477	465	461	452	433	516	Amino acid transporter, putative [0.566] | Amino acid transporter [0.220] | Amino acid permease [0.133] | Amino acid transporter, putative, expressed [0.052] | Amino acid permease I, putative, expressed [0.010] | Amino acid permease 1 [0.006] | amino acid permease 1 [0.006] | amino acid permease 7 [0.003] | Plant invertase/pectin methylesterase inhibitor superfamily [0.003]	amino acid permease 2 | amino acid permease 3 | amino acid permease 8 | amino acid permease 7 | amino acid permease 1 | amino acid permease 6 | amino acid permease 4 | amino acid permease 5	Transmembrane amino acid transporter protein (PF01490) [0.984] | Pectinesterase (PF01095) [0.003] | Plant invertase/pectin methylesterase inhibitor (PF04043) [0.003]	Amino acid transporter, transmembrane domain (IPR013057) [0.984] | Pectinesterase, catalytic (IPR000070) [0.003] | Pectinesterase inhibitor domain (IPR006501) [0.003]	pectinesterase activity (GO:0030599) [0.003] | enzyme inhibitor activity (GO:0004857) [0.003]	cell wall modification (GO:0042545) [0.003]	cell wall (GO:0005618) [0.003]
OG148	18	11	11	13	20	31	12	13	13	17	12	6	12	12	7	16	10	11	10	9	1	12	7	14	8	2	1	2	2	2	101	110	99	126	149	SINGLETON	Pectin lyase-like superfamily protein [0.932] | Pentatricopeptide repeat-containing family protein [0.065] | Pentatricopeptide repeat-containing protein [0.003]	Pectin lyase-like superfamily protein | polygalacturonase abscission zone A. thaliana | Tetratricopeptide repeat (TPR)-like superfamily protein	Glycosyl hydrolases family 28 (PF00295) [0.942] | PPR repeat family (PF13041) [0.068] | PPR repeat (PF01535) [0.068] | PPR repeat (PF12854) [0.003] | Domain of unknown function (DUF4666) (PF15697) [0.003] | Pentatricopeptide repeat domain (PF13812) [0.003] | Pectate lyase superfamily protein (PF12708) [0.003]	Glycoside hydrolase, family 28 (IPR000743) [0.942] | Pentatricopeptide repeat (IPR002885) [0.068] | Protein of unknown function DUF4666 (IPR031421) [0.003] | Pectate lyase superfamily protein (IPR024535) [0.003]	polygalacturonase activity (GO:0004650) [0.942]	carbohydrate metabolic process (GO:0005975) [0.942]	NULL / Representative annotation below 0.1%
OG149	13	10	12	16	14	19	11	16	18	10	16	6	21	8	8	9	7	9	10	11	10	2	6	38	2	6	59	434	414	418	406	396	387	373	357	SINGLETON	Aluminum-activated malate transporter [0.299] | Aluminum-activated malate transporter-like [0.205] | Aluminum activated malate transporter [0.156] | aluminum-activated, malate transporter 12 [0.130] | aluminum-activated malate transporter 9 [0.127] | Aluminum-activated malate transporter 12 [0.013] | aluminum-activated malate transporter 1 [0.013] | Aluminium activated malate transporter family p…	Aluminium activated malate transporter family protein | aluminum-activated, malate transporter 12 | aluminum-activated malate transporter 1 | aluminum-activated malate transporter 9	Aluminium activated malate transporter (PF11744) [1.000] | Pyruvate kinase, barrel domain (PF00224) [0.003] | Protein of unknown function (DUF3537) (PF12056) [0.003] | RNase P subunit p30 (PF01876) [0.003] | Fusaric acid resistance protein-like (PF13515) [0.003]	Aluminum-activated malate transporter (IPR020966) [1.000] | Protein of unknown function DUF3537 (IPR021924) [0.003] | Pyruvate kinase, barrel (IPR015793) [0.003] | RNase P subunit p30 (IPR002738) [0.003]	pyruvate kinase activity (GO:0004743) [0.003] | ribonuclease activity (GO:0004540) [0.003] | potassium ion binding (GO:0030955) [0.003] | magnesium ion binding (GO:0000287) [0.003]	malate transport (GO:0015743) [1.000] | glycolytic process (GO:0006096) [0.003] | tRNA processing (GO:0008033) [0.003]	NULL / Representative annotation below 0.1%
OG150	10	24	11	12	13	15	8	10	11	11	10	11	9	11	6	14	7	11	10	19	20	6	12	10	9	16	8	364	376	366	407	398	389	375	359	350	Callose synthase [0.304] | glucan synthase-like 10 [0.180] | glucan synthase-like 8 [0.101] | glucan synthase-like 7 [0.095] | glucan synthase-like 4 [0.078] | callose synthase 5 [0.052] | glucan synthase-like 3 [0.039] | glucan synthase-like 11 [0.026] | glucan synthase-like 12 [0.026] | Glucan synthase like 4 [0.016] | glucan synthase-like 5 [0.010] | GLUCAN SYNTHASE-LIKE 8 family protein [0.01…	glucan synthase-like 8 | glucan synthase-like 7 | glucan synthase-like 3 | callose synthase 5 | glucan synthase-like 10 | callose synthase 1 | glucan synthase-like 12 | glucan synthase-like 4 | glucan synthase-like 9 | glucan synthase-like 11	1,3-beta-glucan synthase component (PF02364) [0.761] | 1,3-beta-glucan synthase subunit FKS1, domain-1 (PF14288) [0.621] | Vta1 like (PF04652) [0.444]	Glycosyl transferase, family 48 (IPR003440) [0.761] | 1,3-beta-glucan synthase subunit FKS1-like, domain-1 (IPR026899) [0.621]	1,3-beta-D-glucan synthase activity (GO:0003843) [0.761]	(1->3)-beta-D-glucan biosynthetic process (GO:0006075) [0.761]	1,3-beta-D-glucan synthase complex (GO:0000148) [0.761] | membrane (GO:0016020) [0.761]
OG151	10	1	9	30	10	13	13	6	31	10	4	3	14	5	24	3	7	13	5	4	21	15	14	40	0	0	1	1	1	1	2	1	15	SINGLETON	SINGLETON	SINGLETON	Cysteine-rich receptor-like protein kinase [0.489] | Cysteine-rich repeat secretory protein [0.338] | Cysteine-rich receptor-like protein kinase 25 [0.059] | Cysteine-rich receptor-like protein kinase 10 [0.030] | receptor-like protein kinase-related family protein [0.010] | Receptor-like protein kinase-related family protein [0.007] | Leucine-rich repeat receptor-like protein kinase [0.007] | Re…	Domain of unknown function (DUF26) | receptor-like protein kinase-related family protein | Receptor-like protein kinase-related family protein | Receptor protein kinase-related	Salt stress response/antifungal (PF01657) [0.980] | Protein tyrosine kinase (PF07714) [0.013] | Protein kinase domain (PF00069) [0.013] | gag-polypeptide of LTR copia-type (PF14244) [0.003] | COBRA-like protein (PF04833) [0.003]	Gnk2-homologous domain (IPR002902) [0.980] | Protein kinase domain (IPR000719) [0.013] | Serine-threonine/tyrosine-protein kinase, catalytic domain (IPR001245) [0.013] | COBRA, plant (IPR006918) [0.003] | Gag-polypeptide of LTR copia-type (IPR029472) [0.003]	protein kinase activity (GO:0004672) [0.020] | ATP binding (GO:0005524) [0.013]	protein phosphorylation (GO:0006468) [0.020] | cell growth (GO:0016049) [0.003] | cellulose microfibril organization (GO:0010215) [0.003]	anchored component of membrane (GO:0031225) [0.003]
OG152	6	7	20	25	8	30	11	16	9	34	13	1	3	3	6	10	10	13	16	14	2	5	4	30	7	0	1	15	13	24	20	16	13	8	7	6	2-oxoglutarate (2OG) and Fe(II)-dependent oxygenase superfamily protein [0.993] | 2-oxoglutarate-iron(II)-dependent oxygenase [0.003] | 2-oxoacid-dependent dioxygenase [0.003]	2-oxoglutarate (2OG) and Fe(II)-dependent oxygenase superfamily protein | senescence-related gene 1	2OG-Fe(II) oxygenase superfamily (PF03171) [0.924] | non-haem dioxygenase in morphine synthesis N-terminal (PF14226) [0.865] | Jacalin-like lectin domain (PF01419) [0.003]	Oxoglutarate/iron-dependent dioxygenase (IPR005123) [0.924] | Non-haem dioxygenase N-terminal domain (IPR026992) [0.865] | Jacalin-like lectin domain (IPR001229) [0.003]	oxidoreductase activity (GO:0016491) [0.924]	oxidation-reduction process (GO:0055114) [0.924]	NULL / Representative annotation below 0.1%
OG153	13	8	8	11	14	16	8	20	15	8	15	16	17	18	8	11	6	10	11	24	16	9	5	6	2	7	13	48	50	52	56	72	64	56	66	57	AT hook motif DNA-binding family protein [0.997] | AT-hook DNA-binding protein [0.003]	AT hook motif DNA-binding family protein | AT-hook motif nuclear-localized protein 1	Domain of unknown function (DUF296) (PF03479) [0.970] | AT hook motif (PF02178) [0.033] | ACT domain (PF01842) [0.003] | ACT domain (PF13740) [0.003]	PPC domain (IPR005175) [0.970] | AT hook, DNA-binding motif (IPR017956) [0.033] | ACT domain (IPR002912) [0.003]	DNA binding (GO:0003677) [0.033] | amino acid binding (GO:0016597) [0.003]	metabolic process (GO:0008152) [0.003]	NULL / Representative annotation below 0.1%
OG154	12	9	9	9	16	17	9	21	14	10	13	15	12	13	8	12	9	11	12	18	8	13	7	7	7	10	14	257	287	301	275	262	300	295	383	537	Xanthine/uracil permease family protein [0.791] | Nucleobase ascorbate transporter [0.176] | Nucleobase-ascorbate transporter [0.023] | nucleobase-ascorbate transporter 12 [0.003] | Nucleobase-ascorbate transporter-like protein [0.003] | nucleobase-ascorbate transporter 8 [0.003]	Xanthine/uracil permease family protein | nucleobase-ascorbate transporter 8 | nucleobase-ascorbate transporter 12 | nucleobase-ascorbate transporter 7 | Xanthine/uracil/vitamin C permease	Permease family (PF00860) [0.983] | RRM in Demeter (PF15628) [0.003] | N-terminal barrel of NtMGAM and CtMGAM, maltase-glucoamylase (PF16863) [0.003]	Xanthine/uracil/vitamin C permease (IPR006043) [0.983] | Galactose mutarotase, N-terminal barrel (IPR031727) [0.003] | Demeter, RRM-fold domain (IPR028925) [0.003]	transporter activity (GO:0005215) [0.983]	transport (GO:0006810) [0.983] | transmembrane transport (GO:0055085) [0.983]	membrane (GO:0016020) [0.983]
OG155	4	4	12	30	8	6	11	12	31	22	8	4	32	5	5	6	40	11	5	1	4	0	13	11	14	2	80	21	87	27	67	44	SINGLETON	SINGLETON	SINGLETON	SINGLETON	Cytochrome P450, putative [0.591] | Cytochrome P450 [0.276] | Cytochrome P450 family protein [0.090] | Taxadiene 5nalpha hydroxylase [0.020] | Cytochrome P450 716B2 [0.013] | Cytochrome P450 716B1 [0.003] | cytochrome P450, family 718 [0.003] | cDNA clone:J013020I02, full insert sequence [0.003]	cytochrome P450, family 718 | cytochrome P450, family 716, subfamily A, polypeptide 1 | Cytochrome P450 superfamily protein | cytochrome P450, family 716, subfamily A, polypeptide 2	Cytochrome P450 (PF00067) [0.987] | Reverse transcriptase (RNA-dependent DNA polymerase) (PF00078) [0.003] | Iron/manganese superoxide dismutases, C-terminal domain (PF02777) [0.003]	Cytochrome P450 (IPR001128) [0.987] | Manganese/iron superoxide dismutase, C-terminal (IPR019832) [0.003] | Reverse transcriptase domain (IPR000477) [0.003]	iron ion binding (GO:0005506) [0.987] | heme binding (GO:0020037) [0.987] | oxidoreductase activity, acting on paired donors, with incorporation or reduction of molecular oxygen (GO:0016705) [0.987] | superoxide dismutase activity (GO:0004784) [0.003] | metal ion binding (GO:0046872) [0.003]	oxidation-reduction process (GO:0055114) [0.987] | superoxide metabolic process (GO:0006801) [0.003]	NULL / Representative annotation below 0.1%
OG156	14	10	12	12	15	16	14	18	22	8	15	10	14	11	13	10	10	11	11	9	14	9	6	5	4	6	11	59	155	143	237	255	286	286	269	261	C2 calcium/lipid-binding plant phosphoribosyltransferase family protein [0.836] | Calcium-dependent lipid-binding (CaLB domain) plant phosphoribosyltransferase family protein [0.161] | Calcium-dependent lipid-binding domain-containing plant phosphoribosyltransferase-like protein [0.003]	C2 calcium/lipid-binding plant phosphoribosyltransferase family protein | Calcium-dependent lipid-binding (CaLB domain) plant phosphoribosyltransferase family protein	C2 domain (PF00168) [0.993] | Plant phosphoribosyltransferase C-terminal (PF08372) [0.963] | 16S rRNA methyltransferase RsmB/F (PF01189) [0.003]	C2 domain (IPR000008) [0.993] | Phosphoribosyltransferase C-terminal (IPR013583) [0.963] | SAM-dependent methyltransferase RsmB/NOP2-type (IPR001678) [0.003]	protein binding (GO:0005515) [0.957] | methyltransferase activity (GO:0008168) [0.003]	NULL / Representative annotation below 0.1%	NULL / Representative annotation below 0.1%
OG157	14	12	9	25	15	17	13	7	20	49	9	11	10	8	6	12	15	12	20	2	3	1	1	3	4	1	1	1	1	1	981	989	1002	992	991	992	Beta-amyrin synthase [0.301] | Cycloartenol synthase [0.254] | Lupeol synthase [0.151] | Cycloartenol Synthase [0.084] | Amyrin synthase [0.054] | Taraxerol synthase [0.017] | Lanosterol synthase [0.017] | Germanicol synthase [0.013] | Cycloartenol synthase, putative [0.010] | Beta-Amyrin synthase family protein [0.010] | Cycloartenol synthase, putative, expressed [0.010] | Cycloartenol synthase …	Terpenoid cyclases family protein | lupeol synthase 2 | lanosterol synthase 1 | pentacyclic triterpene synthase 1 | lupeol synthase 1 | cycloartenol synthase 1 | catalytics;intramolecular transferases | camelliol C synthase 1 | baruol synthase 1 | thalianol synthase 1 | putative pentacyclic triterpene synthase 3 | marneral synthase	Squalene-hopene cyclase N-terminal domain (PF13249) [0.779] | Squalene-hopene cyclase C-terminal domain (PF13243) [0.773] | Prenyltransferase and squalene oxidase repeat (PF00432) [0.003] | Protein tyrosine kinase (PF07714) [0.003]	Squalene cyclase, N-terminal (IPR032697) [0.779] | Squalene cyclase, C-terminal (IPR032696) [0.773] | PFTB repeat (IPR001330) [0.003] | Serine-threonine/tyrosine-protein kinase, catalytic domain (IPR001245) [0.003]	catalytic activity (GO:0003824) [0.003] | protein kinase activity (GO:0004672) [0.003]	protein phosphorylation (GO:0006468) [0.003]	NULL / Representative annotation below 0.1%
OG158	0	0	8	0	1	15	2	0	2	0	3	216	0	12	13	0	0	8	1	6	7	0	0	0	0	1	1	1	56	47	535	822	658	645	637	638	Retrotransposon protein, putative, Ty3-gypsy subclass [0.227] | Retrotransposon protein, putative, unclassified [0.153] | F5M15.26 [0.068] | Gag-pol polyprotein [0.064] | Ribonuclease H [0.037] | GagPol3 [0.034] | Transposon protein, putative, unclassified [0.034] | Pol-polyprotein [0.031] | Polyprotein [0.027] | GAG-POL [0.024] | Gag/pol polyprotein [0.024] | Polynucleotidyl transferase, ribonuc…	Unkown protein(s) / No TAIR description(s)	Reverse transcriptase-like (PF13456) [0.200] | Reverse transcriptase (RNA-dependent DNA polymerase) (PF00078) [0.180] | Integrase core domain (PF00665) [0.017] | Domain of unknown function (DUF834) (PF05754) [0.010] | MatE (PF01554) [0.003] | His(2)-Cys(2) zinc finger (PF09337) [0.003] | Aspartyl protease (PF13650) [0.003]	Reverse transcriptase domain (IPR000477) [0.180] | Integrase, catalytic core (IPR001584) [0.017] | Domain of unknown function DUF834 (IPR008552) [0.010] | Multi antimicrobial extrusion protein (IPR002528) [0.003] | Zinc finger, H2C2-type, histone UAS binding (IPR015416) [0.003]	drug transmembrane transporter activity (GO:0015238) [0.003] | antiporter activity (GO:0015297) [0.003]	DNA integration (GO:0015074) [0.017] | transmembrane transport (GO:0055085) [0.003] | drug transmembrane transport (GO:0006855) [0.003]	membrane (GO:0016020) [0.003]
OG159	27	8	7	38	1	6	14	7	16	4	3	0	124	4	1	8	15	2	8	1	0	0	0	0	0	0	32	46	38	39	45	49	40	35	1545	1096	TRAF-like family protein [0.969] | Ubiquitin carboxyl-terminal hydrolase [0.010] | MATH domain containing protein [0.007] | Auxin efflux carrier family protein [0.003] | BTB-POZ and MATH domain 2 [0.003] | DNA-directed RNA polymerase [0.003] | Resistance protein [0.003]	TRAF-like family protein | TRAF-like superfamily protein	MATH domain (PF00917) [0.871] | BTB/POZ domain (PF00651) [0.003]	MATH/TRAF domain (IPR002083) [0.871] | BTB/POZ domain (IPR000210) [0.003]	protein binding (GO:0005515) [0.871]	NULL / Representative annotation below 0.1%	NULL / Representative annotation below 0.1%
OG160	24	25	9	44	0	21	17	69	2	0	1	0	0	46	12	2	11	6	3	0	1	0	0	0	0	0	9	57	70	60	827	656	659	646	638	639	nucleic acid binding;zinc ion binding [0.369] | zinc ion binding;nucleic acid binding [0.143] | Retrotransposon protein, putative, unclassified [0.055] | Gag polyprotein [0.034] | Zinc knuckle (CCHC-type) family protein [0.017] | Orf120b protein [0.017] | zinc knuckle (CCHC-type) family protein [0.010] | Gag-Pol polyprotein [0.010] | P-loop containing nucleoside triphosphate hydrolases superfamil…	nucleic acid binding;zinc ion binding | Zinc knuckle (CCHC-type) family protein | zinc ion binding;nucleic acid binding	Domain of unknown function (DUF4283) (PF14111) [0.625] | Zinc knuckle (PF14392) [0.532] | Reverse transcriptase-like (PF13456) [0.003] | Aldehyde dehydrogenase family (PF00171) [0.003] | Domain of unknown function (DUF569) (PF04601) [0.003] | Sulfotransferase domain (PF00685) [0.003] | zinc-binding in reverse transcriptase (PF13966) [0.003] | Glycosyltransferase sugar-binding region containing DX…	Domain of unknown function DUF4283 (IPR025558) [0.625] | Zinc knuckle CX2CX4HX4C (IPR025836) [0.532] | Sulfotransferase domain (IPR000863) [0.003] | Reverse transcriptase zinc-binding domain (IPR026960) [0.003] | Domain of unknown function DUF569 (IPR007679) [0.003] | Cytochrome P450 (IPR001128) [0.003] | Zinc finger, CCHC-type (IPR001878) [0.003] | Alpha 1,4-glycosyltransferase domain (IPR007652…	iron ion binding (GO:0005506) [0.003] | oxidoreductase activity, acting on paired donors, with incorporation or reduction of molecular oxygen (GO:0016705) [0.003] | nucleic acid binding (GO:0003676) [0.003] | oxidoreductase activity (GO:0016491) [0.003] | zinc ion binding (GO:0008270) [0.003] | heme binding (GO:0020037) [0.003] | sulfotransferase activity (GO:0008146) [0.003]	oxidation-reduction process (GO:0055114) [0.007] | metabolic process (GO:0008152) [0.003]	NULL / Representative annotation below 0.1%
OG161	10	10	8	9	10	9	8	17	18	11	12	18	14	13	8	12	10	9	7	23	12	8	5	15	3	10	5	25	2	2	1766	1340	589	199	992	993	basic helix-loop-helix (bHLH) DNA-binding superfamily protein [0.903] | Basic helix-loop-helix DNA-binding superfamily protein [0.059] | BHLH transcription factor [0.014] | BHLH transcription factor-like protein [0.010] | Basic helix-loop-helix family protein [0.007] | BHLH transcription factor GBOF-1 [0.003] | Basic helix-loop-helix [0.003]	basic helix-loop-helix (bHLH) DNA-binding superfamily protein | cryptochrome-interacting basic-helix-loop-helix 1 | BIG PETAL P | BR enhanced expression 3 | BR enhanced expression 2 | BR enhanced expression 1	Helix-loop-helix DNA-binding domain (PF00010) [0.862] | Anaphase-promoting complex, subunit 10 (APC10) (PF03256) [0.003] | F-box-like (PF12937) [0.003]	Myc-type, basic helix-loop-helix (bHLH) domain (IPR011598) [0.862] | F-box domain (IPR001810) [0.003] | APC10/DOC domain (IPR004939) [0.003]	protein dimerization activity (GO:0046983) [0.862] | protein binding (GO:0005515) [0.003]	NULL / Representative annotation below 0.1%	NULL / Representative annotation below 0.1%
OG162	7	10	19	78	4	5	14	8	55	21	2	0	1	1	5	4	6	26	7	7	8	0	0	0	0	0	44	270	271	244	222	207	199	277	362	353	DNA-directed RNA polymerase subunit alpha [0.003] | UDP-2,3-diacylglucosamine hydrolase [0.003] | ATP-dependent helicase/nuclease subunit A [0.003] | 30S ribosomal protein S14 type Z [0.003]	Protein of unknown function (DUF594)	Domain of unknown function (DUF4220) (PF13968) [0.899] | Protein of unknown function, DUF594 (PF04578) [0.847]	Domain of unknown function DUF4220 (IPR025315) [0.899] | Protein of unknown function DUF594 (IPR007658) [0.847]	NULL / Representative annotation below 0.1%	NULL / Representative annotation below 0.1%	NULL / Representative annotation below 0.1%
OG163	10	9	11	14	16	15	11	15	18	14	16	6	18	9	5	11	6	11	10	16	17	7	7	5	5	5	31	1	49	51	59	60	848	657	647	651	Nuclear transcription factor Y subunit B [0.310] | nuclear factor Y, subunit B5 [0.171] | nuclear factor Y, subunit B6 [0.098] | Nuclear transcription factor Y subunit B12 [0.070] | nuclear factor Y, subunit B4 [0.070] | Nuclear transcription factor Y subunit B3 [0.059] | nuclear factor Y, subunit B7 [0.035] | Nuclear transcription factor Y subunit B-3 [0.035] | Nuclear transcription factor Y sub…	nuclear factor Y, subunit B10 | nuclear factor Y, subunit B8 | nuclear factor Y, subunit B6 | Histone superfamily protein | nuclear factor Y, subunit B3 | nuclear factor Y, subunit B2 | nuclear factor Y, subunit B4 | nuclear factor Y, subunit B7 | nuclear factor Y, subunit B5 | nuclear factor Y, subunit B1	Histone-like transcription factor (CBF/NF-Y) and archaeal histone (PF00808) [0.997]	Transcription factor CBF/NF-Y/archaeal histone domain (IPR003958) [0.997]	NULL / Representative annotation below 0.1%	NULL / Representative annotation below 0.1%	NULL / Representative annotation below 0.1%
OG164	11	8	9	7	16	11	9	13	18	10	12	17	8	13	7	12	8	10	10	29	23	10	6	6	2	2	1	12	9	11	8	5	8	9	1195	356	BEL1-like homeodomain protein [0.380] | BEL1-like homeodomain 1 family protein [0.143] | Homeobox protein BEL1 homolog [0.115] | Bel1 homeotic protein, putative [0.063] | Homeodomain-containing family protein [0.063] | BEL1-like homeodomain protein 6 [0.045] | BEL1-like homeodomain 6 [0.038] | BEL1-type homeodomain protein [0.038] | BEL1-like homeodomain 2 [0.017] | Associated with HOX family pro…	POX (plant homeobox) family protein | BEL1-like homeodomain 5 | BEL1-like homeodomain 7 | BEL1-like homeodomain 2 | BEL1-like homeodomain 6 | BEL1-like homeodomain 4 | BEL1-like homeodomain 10 | BEL1-like homeodomain 3 | BEL1-like homeodomain 8 | BEL1-like homeodomain 1	Associated with HOX (PF07526) [0.958] | Homeobox KN domain (PF05920) [0.892] | Ras family (PF00071) [0.003] | zinc-binding in reverse transcriptase (PF13966) [0.003]	POX domain (IPR006563) [0.958] | Homeobox KN domain (IPR008422) [0.892] | Reverse transcriptase zinc-binding domain (IPR026960) [0.003] | Small GTPase superfamily (IPR001806) [0.003]	DNA binding (GO:0003677) [0.892] | GTPase activity (GO:0003924) [0.003] | GTP binding (GO:0005525) [0.003]	regulation of transcription, DNA-templated (GO:0006355) [0.892]	NULL / Representative annotation below 0.1%
OG165	11	8	8	9	14	12	10	14	17	9	22	28	14	13	6	6	5	11	10	19	12	8	9	6	3	2	25	5	6	4	4	30	43	2234	2309	2367	Transcription factor, putative [0.378] | TCP transcription factor [0.129] | Transcription factor TCP4 [0.070] | TCP family transcription factor [0.063] | Transcription factor CYCLOIDEA [0.056] | TCP family transcription factor containing protein [0.042] | CYC-like protein 1 [0.024] | CYCLOIDEA-like group 1B protein [0.021] | TB1-like TCP family transcription factor [0.017] | Cycloidea-like protei…	TCP family transcription factor | TCP domain protein 12 | TEOSINTE BRANCHED 1, cycloidea, and PCF family 24 | TEOSINTE BRANCHED 1, cycloidea and PCF transcription factor 3 | TCP domain protein 17 | TCP family transcription factor 4 | TCP domain protein 10 | TEOSINTE BRANCHED 1, cycloidea and PCF transcription factor 5 | plastid transcription factor 1 | TEOSINTE BRANCHED 1, cycloidea and PCF trans…	TCP family transcription factor (PF03634) [0.986] | Ring finger domain (PF13639) [0.003]	Transcription factor, TCP (IPR005333) [0.986] | Zinc finger, RING-type (IPR001841) [0.003]	zinc ion binding (GO:0008270) [0.003] | protein binding (GO:0005515) [0.003]	NULL / Representative annotation below 0.1%	NULL / Representative annotation below 0.1%
OG166	8	8	9	28	10	15	17	12	18	6	15	10	10	6	15	9	11	22	24	9	2	4	0	18	0	0	8	139	127	114	100	101	90	81	79	68	alpha/beta-Hydrolases superfamily protein [1.000]	alpha/beta-Hydrolases superfamily protein | carboxyesterase 5 | carboxyesterase 13	alpha/beta hydrolase fold (PF07859) [1.000] | Transport protein particle (TRAPP) component (PF04051) [0.003] | Protein of unknown function (DUF632) (PF04782) [0.003] | Carboxylesterase family (PF00135) [0.003]	Alpha/beta hydrolase fold-3 (IPR013094) [1.000] | Carboxylesterase, type B (IPR002018) [0.003] | Domain of unknown function DUF632 (IPR006867) [0.003] | Transport protein particle (TRAPP) component (IPR007194) [0.003]	hydrolase activity (GO:0016787) [1.000]	metabolic process (GO:0008152) [1.000]	NULL / Representative annotation below 0.1%
OG167	10	7	6	12	13	14	8	15	17	7	11	14	11	14	3	9	7	11	11	29	13	6	7	24	2	4	38	121	159	158	149	266	376	365	1586	1612	Homeobox-leucine zipper protein family [0.565] | Homeobox-leucine zipper family protein [0.246] | Homeobox-leucine zipper protein [0.046] | Homeobox-leucine zipper protein 17 [0.025] | Homeobox-leucine zipper protein HOX3 [0.018] | Homeobox-leucine zipper protein HAT14, putative [0.018] | Homeobox-leucine zipper protein HOX27 [0.011] | Homeobox-leucine zipper protein HOX11 [0.011] | Homeobox-leuc…	Homeobox-leucine zipper protein 4 (HB-4) / HD-ZIP protein | Homeobox-leucine zipper protein family | homeobox protein 2 | homeobox-leucine zipper protein 17 | homeobox-leucine zipper protein 3 | homeobox-leucine zipper protein 4 | homeobox from Arabidopsis thaliana | homeobox-leucine zipper protein 18	Homeobox domain (PF00046) [0.937] | Homeobox associated leucine zipper (PF02183) [0.863] | HD-ZIP protein N terminus (PF04618) [0.298] | Auxin responsive protein (PF02519) [0.004]	Homeobox domain (IPR001356) [0.937] | Leucine zipper, homeobox-associated (IPR003106) [0.863] | HD-ZIP protein, N-terminal (IPR006712) [0.298] | Small auxin-up RNA (IPR003676) [0.004]	DNA binding (GO:0003677) [0.937] | sequence-specific DNA binding (GO:0043565) [0.863] | transcription factor activity, sequence-specific DNA binding (GO:0003700) [0.863]	regulation of transcription, DNA-templated (GO:0006355) [0.863] | response to auxin (GO:0009733) [0.004]	nucleus (GO:0005634) [0.298]
OG168	10	8	11	16	12	19	11	12	26	19	15	9	12	10	14	12	21	6	7	7	0	3	7	4	8	4	6	33	36	30	29	26	23	17	19	18	GDSL esterase/lipase [0.947] | GDSL-lipase protein [0.014] | GDSL esterase/lipase At5g08460 [0.007] | GDSL esterase/lipase At1g71250 [0.007] | GDSL esterase/lipase 7 [0.007] | GDSL esterase/lipase At5g45670 [0.004] | GDSL-like Lipase/Acylhydrolase superfamily protein [0.004] | GDSL esterase/lipase At1g71691 [0.004] | GDSL esterase/lipase At1g29670 [0.004] | GDSL esterase/lipase At2g19010 [0.004]	GDSL-like Lipase/Acylhydrolase superfamily protein | GDSL-motif lipase 7	GDSL-like Lipase/Acylhydrolase (PF00657) [0.961]	GDSL lipase/esterase (IPR001087) [0.961]	hydrolase activity, acting on ester bonds (GO:0016788) [0.961]	NULL / Representative annotation below 0.1%	NULL / Representative annotation below 0.1%
OG169	10	6	6	11	19	10	9	8	11	10	19	14	25	7	7	11	15	6	8	11	2	6	12	5	4	31	160	300	276	251	228	216	206	195	182	155	Chlorophyll a-b binding protein, chloroplastic [0.784] | Chlorophyll A/B binding protein, putative [0.159] | Chlorophyll a/b-binding protein [0.032] | Chlorophyll A-B binding protein, expressed [0.007] | Chlorophyll a-b binding protein CP26, chloroplastic [0.004] | Chlorophyll A/B binding protein CP26 chloroplastic-like protein [0.004] | Chlorophyll a/b binding protein [0.004] | Chlorophyll A-B b…	chlorophyll A/B binding protein 3 | photosystem II light harvesting complex gene 2.2 | light harvesting complex of photosystem II 5 | light-harvesting chlorophyll B-binding protein 3 | photosystem II light harvesting complex gene B1B2 | chlorophyll A/B binding protein 1 | light-harvesting chlorophyll-protein complex II subunit B1 | chlorophyll A/B-binding protein 2 | photosystem II light harvesti…	Chlorophyll A-B binding protein (PF00504) [0.961]	Chlorophyll A-B binding protein (IPR022796) [0.961]	NULL / Representative annotation below 0.1%	NULL / Representative annotation below 0.1%	NULL / Representative annotation below 0.1%
OG170	11	5	9	23	12	11	9	8	10	10	5	3	6	7	9	10	35	18	18	10	18	6	8	15	1	5	143	516	455	459	1342	1409	1464	1484	1495	1518	Glutathione S-transferase [0.688] | Glutathione S-transferase family protein [0.184] | Glutathione S-transferase-like protein [0.071] | Glutathione-S-transferase [0.039] | Glutathione S-transferase IV [0.004] | glutathione S-transferase F11 [0.004] | Glutathione S-transferase 4 [0.004] | Glutathione S-transferase F12 [0.004] | glutathione S-transferase F4 [0.004]	glutathione S-transferase F3 | glutathione S-transferase PHI 10 | glutathione S-transferase PHI 2 | glutathione S-transferase phi 8 | glutathione S-transferase PHI 9 | glutathione S-transferase F4 | glutathione S-transferase phi 12 | Glutathione S-transferase family protein | glutathione S-transferase F11 | glutathione S-transferase 7 | glutathione S-transferase 6	Glutathione S-transferase, C-terminal domain (PF00043) [0.929] | Glutathione S-transferase, N-terminal domain (PF02798) [0.844] | Glutathione S-transferase, N-terminal domain (PF13417) [0.035] | Reverse transcriptase-like (PF13456) [0.004] | Cytochrome b5-like Heme/Steroid binding domain (PF00173) [0.004] | Protein of unknown function DUF260 (PF03195) [0.004]	Glutathione S-transferase, C-terminal (IPR004046) [0.929] | Glutathione S-transferase, N-terminal (IPR004045) [0.876] | Lateral organ boundaries, LOB (IPR004883) [0.004] | Cytochrome b5-like heme/steroid binding domain (IPR001199) [0.004]	protein binding (GO:0005515) [0.876]	NULL / Representative annotation below 0.1%	NULL / Representative annotation below 0.1%
OG171	9	10	11	6	8	10	9	12	21	11	10	8	9	8	7	9	10	8	8	21	7	10	11	10	27	11	32	1	7	6	9	113	319	311	294	282	Tubulin beta chain [0.801] | Tubulin beta chain, putative [0.196] | Tubulin beta chain family protein [0.004]	tubulin beta-7 chain | tubulin beta-9 chain | beta-6 tubulin | tubulin beta chain 3 | tubulin beta-5 chain | tubulin beta 8 | tubulin beta-1 chain | tubulin beta chain 4 | tubulin beta chain 2	Tubulin/FtsZ family, GTPase domain (PF00091) [0.979] | Tubulin C-terminal domain (PF03953) [0.829] | Glutathione peroxidase (PF00255) [0.004]	Tubulin/FtsZ, GTPase domain (IPR003008) [0.979] | Tubulin/FtsZ, 2-layer sandwich domain (IPR018316) [0.829] | Glutathione peroxidase (IPR000889) [0.004]	GTPase activity (GO:0003924) [0.979] | glutathione peroxidase activity (GO:0004602) [0.004]	oxidation-reduction process (GO:0055114) [0.004] | response to oxidative stress (GO:0006979) [0.004]	NULL / Representative annotation below 0.1%
OG172	7	6	8	13	11	14	8	10	12	10	11	6	16	18	9	10	19	16	16	13	8	8	12	5	7	8	14	22	46	58	62	62	69	68	72	89	Argonaute family protein [0.683] | Argonaute [0.057] | Argonaute family member [0.053] | Argonaute 1 [0.050] | ARGONAUTE 1 [0.032] | Protein argonaute 1B [0.018] | Protein argonaute [0.014] | Protein argonaute MEL1 [0.011] | Protein argonaute 1 [0.011] | Protein argonaute 1A [0.011] | Protein argonaute 1D [0.007] | Protein argonaute 1C [0.007] | Protein argonaute 18 [0.004] | Protein argonaute 12…	Argonaute family protein | Stabilizer of iron transporter SufD / Polynucleotidyl transferase | PAZ domain-containing protein / piwi domain-containing protein	Piwi domain (PF02171) [0.915] | PAZ domain (PF02170) [0.865] | N-terminal domain of argonaute (PF16486) [0.854] | Argonaute linker 2 domain (PF16488) [0.851] | Argonaute linker 1 domain (PF08699) [0.840] | Mid domain of argonaute (PF16487) [0.616] | Glycine-rich region of argonaut (PF12764) [0.114] | GATA zinc finger (PF00320) [0.004] | TIP49 C-terminus (PF06068) [0.004] | tify domain (PF06200) […	Piwi domain (IPR003165) [0.915] | PAZ domain (IPR003100) [0.865] | Protein argonaute, N-terminal (IPR032474) [0.854] | Argonaute linker 2 domain (IPR032472) [0.851] | Argonaute, linker 1 domain (IPR014811) [0.840] | Protein argonaute, Mid domain (IPR032473) [0.616] | Argonaut, glycine-rich domain (IPR024357) [0.114] | Tify domain (IPR010399) [0.004] | Zinc finger, GATA-type (IPR000679) [0.004] | …	nucleic acid binding (GO:0003676) [0.915] | protein binding (GO:0005515) [0.865] | ATP binding (GO:0005524) [0.004] | sequence-specific DNA binding (GO:0043565) [0.004] | transcription factor activity, sequence-specific DNA binding (GO:0003700) [0.004] | zinc ion binding (GO:0008270) [0.004] | DNA helicase activity (GO:0003678) [0.004]	regulation of transcription, DNA-templated (GO:0006355) [0.004]	NULL / Representative annotation below 0.1%
OG174	9	6	8	7	10	18	9	12	10	7	9	8	9	11	7	14	11	10	12	10	16	7	8	36	5	9	22	124	881	944	789	1024	1417	1434	1437	1458	Histone H2A [0.968] | Histone H2A family protein [0.032]	Histone superfamily protein | histone H2A 10 | gamma histone variant H2AX | histone H2A 2 | histone H2A 13 | histone H2A 7 | histone H2A 12 | histone H2A 6	C-terminus of histone H2A (PF16211) [0.924] | Core histone H2A/H2B/H3/H4 (PF00125) [0.871]	Histone H2A, C-terminal domain (IPR032454) [0.924] | Histone H2A/H2B/H3 (IPR007125) [0.871]	DNA binding (GO:0003677) [0.871]	NULL / Representative annotation below 0.1%	NULL / Representative annotation below 0.1%
OG175	14	7	6	22	15	17	7	15	12	5	10	8	10	11	6	5	10	17	18	26	13	8	9	3	3	0	44	16	27	40	893	220	243	223	317	301	Zinc finger family protein [0.635] | Zinc finger protein [0.141] | Zinc finger protein, putative [0.076] | C2H2-type zinc finger family protein [0.043] | C2H2 zinc finger protein [0.036] | C2H2-like zinc finger protein [0.025] | EPF-type Cis2-His2 zinc finger transcription factor [0.007] | C2H2-type zinc finger protein 5 [0.004] | C2H2 type zinc finger transcription factor ZFP17 [0.004] | C2H2 ty…	C2H2-type zinc finger family protein | C2H2-like zinc finger protein | C2H2 and C2HC zinc fingers superfamily protein	C2H2-type zinc finger (PF13912) [0.993] | C2H2-type zinc finger (PF13894) [0.004]	NULL / Representative annotation below 0.1%	NULL / Representative annotation below 0.1%	NULL / Representative annotation below 0.1%	NULL / Representative annotation below 0.1%
OG176	10	5	10	8	16	13	8	14	15	7	10	9	13	14	7	14	9	11	10	19	14	10	4	16	5	6	3	1122	1427	183	54	3	2	2189	2258	2314	A20/AN1-like zinc finger family protein [0.895] | Zinc finger A20 and AN1 domain-containing stress-associated protein [0.058] | Zinc finger A20 and AN1 domain-containing stress-associated protein 9 [0.014] | Zinc finger A20 and AN1 domain-containing stress-associated protein 5 [0.004] | Zinc finger A20 and AN1 domain-containing stress-associated protein 6 [0.004] | Zinc finger A20 and AN1 domain-…	A20/AN1-like zinc finger family protein | stress-associated protein 10	AN1-like Zinc finger (PF01428) [0.964] | A20-like zinc finger (PF01754) [0.823] | Vacuolar protein sorting 55 (PF04133) [0.004]	Zinc finger, AN1-type (IPR000058) [0.964] | Zinc finger, A20-type (IPR002653) [0.823] | Vacuolar protein sorting 55 (IPR007262) [0.004]	zinc ion binding (GO:0008270) [0.975] | DNA binding (GO:0003677) [0.823]	NULL / Representative annotation below 0.1%	NULL / Representative annotation below 0.1%
OG177	15	7	10	27	8	37	5	8	11	9	16	4	16	8	7	11	10	12	10	8	12	6	1	17	0	1	271	233	8	10	1788	1025	1418	1435	1438	1459	F-box family protein [0.514] | F-box protein PP2-B1 [0.145] | F-box family protein-like [0.091] | F-box protein PP2-B15 [0.069] | F-box protein PP2-B3 [0.047] | phloem protein 2-B10 [0.014] | phloem protein 2-B11 [0.011] | phloem protein 2-B15 [0.011] | F-box protein PP2-B11 [0.007] | F-box family-like protein [0.007] | phloem protein 2-B7 [0.007] | F-box domain containing protein, expressed [0.0…	phloem protein 2-B7 | phloem protein 2-B12 | phloem protein 2-B13 | phloem protein 2-B8 | SKP1 interacting partner 3 | phloem protein 2-B5 | phloem protein 2-B1 | phloem protein 2-B2 | phloem protein 2-B11 | phloem protein 2-B10 | phloem protein 2-B15 | phloem protein 2-B4 | phloem protein 2-B6 | F-box family protein | phloem protein 2-B14	Phloem protein 2 (PF14299) [0.899] | F-box domain (PF00646) [0.333] | F-box-like (PF12937) [0.058] | TIR domain (PF01582) [0.004]	Phloem protein 2-like (IPR025886) [0.899] | F-box domain (IPR001810) [0.391] | Toll/interleukin-1 receptor homology (TIR) domain (IPR000157) [0.004]	protein binding (GO:0005515) [0.395]	signal transduction (GO:0007165) [0.004]	NULL / Representative annotation below 0.1%
OG178	15	7	11	11	9	21	13	13	19	7	11	9	13	11	8	14	10	11	14	19	8	5	5	11	0	0	1	1	56	47	48	48	92	1436	1439	1460	Early nodulin-like protein [0.684] | Early nodulin-like protein 1 [0.058] | early nodulin-like protein 1 [0.051] | Early nodulin-like protein 2 [0.036] | early nodulin-like protein 2 [0.029] | Early nodulin, putative [0.029] | early nodulin-like protein 3 [0.025] | early nodulin-like protein 9 [0.015] | Early nodulin-like protein 3 [0.011] | early nodulin-like protein 7 [0.011] | Plastocyanin-lik…	early nodulin-like protein 11 | early nodulin-like protein 9 | early nodulin-like protein 15 | early nodulin-like protein 14 | early nodulin-like protein 5 | early nodulin-like protein 13 | early nodulin-like protein 10 | early nodulin-like protein 4 | early nodulin-like protein 6 | early nodulin-like protein 12 | early nodulin-like protein 3 | early nodulin-like protein 2 | early nodulin-like pr…	Plastocyanin-like domain (PF02298) [1.000] | MatE (PF01554) [0.004] | Uncharacterized protein family, UPF0114 (PF03350) [0.004]	Phytocyanin domain (IPR003245) [1.000] | Multi antimicrobial extrusion protein (IPR002528) [0.004] | Uncharacterised protein family UPF0114 (IPR005134) [0.004]	electron carrier activity (GO:0009055) [1.000] | antiporter activity (GO:0015297) [0.004] | drug transmembrane transporter activity (GO:0015238) [0.004]	drug transmembrane transport (GO:0006855) [0.004] | transmembrane transport (GO:0055085) [0.004]	membrane (GO:0016020) [0.004]
OG179	10	10	11	12	14	18	15	11	13	12	20	6	12	10	12	9	14	4	5	9	12	2	9	25	0	0	1	1	42	41	31	52	70	61	65	55	TRICHOME BIREFRINGENCE-LIKE 36 [0.113] | TRICHOME BIREFRINGENCE-LIKE 38 [0.113] | TRICHOME BIREFRINGENCE-LIKE 45 [0.098] | TRICHOME BIREFRINGENCE-LIKE 43 [0.069] | TRICHOME BIREFRINGENCE-LIKE 37 [0.033] | TRICHOME BIREFRINGENCE-LIKE 42 [0.033] | TRICHOME BIREFRINGENCE-LIKE 41 [0.018] | LRR receptor-like protein kinase [0.011] | Trichome birefringence [0.007] | TRICHOME BIREFRINGENCE-LIKE 5 [0.007…	Plant protein of unknown function (DUF828) | TRICHOME BIREFRINGENCE-LIKE 42 | TRICHOME BIREFRINGENCE-LIKE 41 | TRICHOME BIREFRINGENCE-LIKE 37 | TRICHOME BIREFRINGENCE-LIKE 38 | TRICHOME BIREFRINGENCE-LIKE 43 | TRICHOME BIREFRINGENCE-LIKE 36 | TRICHOME BIREFRINGENCE-LIKE 39 | TRICHOME BIREFRINGENCE-LIKE 45	GDSL/SGNH-like Acyl-Esterase family found in Pmr5 and Cas1p (PF13839) [0.985] | PMR5 N terminal Domain (PF14416) [0.880] | gag-polypeptide of LTR copia-type (PF14223) [0.004] | Integrase core domain (PF00665) [0.004] | GAG-pre-integrase domain (PF13976) [0.004]	PC-Esterase (IPR026057) [0.985] | PMR5 N-terminal domain (IPR025846) [0.880] | GAG-pre-integrase domain (IPR025724) [0.004] | Integrase, catalytic core (IPR001584) [0.004]	NULL / Representative annotation below 0.1%	DNA integration (GO:0015074) [0.004]	NULL / Representative annotation below 0.1%
OG180	11	10	9	9	14	11	9	12	13	10	16	10	9	11	8	15	11	11	12	15	12	11	10	5	2	7	37	114	81	74	163	799	802	781	492	479	Core-2/I-branching beta-1,6-N-acetylglucosaminyltransferase family protein [0.985] | Beta-1-3-galactosyl-o-glycosyl-glycoprotein [0.007] | Beta-1,3-galactosyl-O-glycosyl-glycoprotein beta-1,6-N-acetylglucosaminyltransferase 3 [0.004] | Beta-1,3-galactosyl-O-glycosyl-glycoprotein beta-1,6-N-acetylglucosaminyltransferase [0.004]	Core-2/I-branching beta-1,6-N-acetylglucosaminyltransferase family protein	Core-2/I-Branching enzyme (PF02485) [1.000] | Heme oxygenase (PF01126) [0.004]	Glycosyl transferase, family 14 (IPR003406) [1.000] | Haem oxygenase-like (IPR016053) [0.004]	acetylglucosaminyltransferase activity (GO:0008375) [1.000] | heme oxygenase (decyclizing) activity (GO:0004392) [0.004]	heme oxidation (GO:0006788) [0.004] | oxidation-reduction process (GO:0055114) [0.004]	membrane (GO:0016020) [1.000]
OG181	10	8	9	13	15	13	8	14	17	11	9	15	8	12	9	15	8	10	12	13	10	9	8	5	4	8	1	28	45	45	40	34	30	28	24	21	Cellulose synthase [0.473] | Cellulose synthase family protein [0.440] | cellulose synthase family protein [0.077] | Cellulose synthase, expressed [0.007] | Cellulose synthase-like protein [0.004]	Cellulose synthase family protein | cellulose synthase A2 | cellulose synthase 6 | cellulose synthase family protein | cellulose synthase A9 | cellulose synthase A4 | cellulose synthase 5 | cellulose synthase 1 | cellulose synthase 10	Cellulose synthase (PF03552) [0.996] | Zinc-binding RING-finger (PF14569) [0.901] | CHCH-CHCH-like Cx9C, IMS import disulfide relay-system, (PF16860) [0.004]	Cellulose synthase (IPR005150) [0.996] | Cellulose synthase, RING-type zinc finger (IPR027934) [0.901] | IMS import disulfide relay-system, CHCH-CHCH-like Cx9C (IPR031731) [0.004]	cellulose synthase (UDP-forming) activity (GO:0016760) [0.996]	cellulose biosynthetic process (GO:0030244) [0.996]	membrane (GO:0016020) [0.996]
OG182	13	10	9	13	12	10	7	14	14	6	13	9	10	11	7	8	4	13	14	20	9	6	5	24	3	8	6	127	97	100	118	524	517	2101	2156	2201	Plasma membrane intrinsic protein [0.199] | Plasma membrane intrinsic protein 1 [0.188] | Aquaporin [0.140] | Plasma membrane intrinsic protein 1-1 [0.136] | Plasma membrane aquaporin [0.118] | Plasma membrane intrinsic protein PIP2.1 [0.088] | Aquaporin 1 [0.044] | Plasma membrane aquaporin 1 [0.015] | Aquaporin PIP2-1 [0.011] | plasma membrane intrinsic protein 1;4 [0.011] | Plasma membrane int…	plasma membrane intrinsic protein 2E | plasma membrane intrinsic protein 1A | plasma membrane intrinsic protein 1B | Aquaporin-like superfamily protein | plasma membrane intrinsic protein 3 | plasma membrane intrinsic protein 2;8 | plasma membrane intrinsic protein 1C | plasma membrane intrinsic protein 1;4 | plasma membrane intrinsic protein 2 | plasma membrane intrinsic protein 2;4 | plasma mem…	Major intrinsic protein (PF00230) [1.000]	Major intrinsic protein (IPR000425) [1.000]	transporter activity (GO:0005215) [1.000]	transport (GO:0006810) [1.000]	membrane (GO:0016020) [1.000]
OG184	16	11	10	19	13	12	10	16	14	11	15	7	11	9	14	10	8	11	11	11	11	6	5	4	2	4	1	1	1	334	269	256	244	226	215	210	Cyclic nucleotide-gated channel [0.310] | cyclic nucleotide gated channel 1 [0.199] | cyclic nucleotide-gated channel 15 [0.148] | cyclic nucleotide gated channel 5 [0.092] | cyclic nucleotide gated channel 9 [0.070] | Cyclic nucleotide-gated ion channel, putative [0.041] | cyclic nucleotide gated channel 8 [0.033] | cyclic nucleotide-gated channel 16 [0.015] | cyclic nucleotide-gated channel 18 …	cyclic nucleotide-gated channel 14 | cyclic nucleotide-gated channel 13 | cyclic nucleotide-gated channel 18 | cyclic nucleotide gated channel 5 | cyclic nucleotide-gated channel 17 | cyclic nucleotide gated channel 10 | cyclic nucleotide-gated channel 6 | cyclic nucleotide-gated channel 16 | cyclic nucleotide gated channel 9 | cyclic nucleotide-gated channels | cyclic nucleotide-gated channel 12…	Ion transport protein (PF00520) [0.919] | Cyclic nucleotide-binding domain (PF00027) [0.775]	Ion transport domain (IPR005821) [0.919] | Cyclic nucleotide-binding domain (IPR000595) [0.775]	ion channel activity (GO:0005216) [0.919]	ion transport (GO:0006811) [0.919] | transmembrane transport (GO:0055085) [0.919]	membrane (GO:0016020) [0.919]
OG185	11	9	8	11	12	13	9	29	17	6	10	12	9	9	8	8	10	12	11	14	12	5	8	3	5	7	34	84	72	77	1372	1081	1096	1097	1092	1097	Glutaredoxin family protein [0.862] | Glutaredoxin-like [0.060] | Glutaredoxin family protein, expressed [0.026] | Thioredoxin fold [0.011] | Glutaredoxin domain-containing cysteine-rich protein [0.007] | OJ000126_13.3 protein [0.007] | Electron transporter [0.004] | Glutaredoxin domain containing protein [0.004] | Electron transporter/ thiol-disulfide exchange intermediate [0.004] | Hop-interact…	Glutaredoxin family protein | Thioredoxin superfamily protein	Glutaredoxin (PF00462) [0.951] | LSM domain (PF01423) [0.004] | Reverse transcriptase-like (PF13456) [0.004]	Glutaredoxin (IPR002109) [0.951] | LSM domain, eukaryotic/archaea-type (IPR001163) [0.004]	electron carrier activity (GO:0009055) [0.951] | protein disulfide oxidoreductase activity (GO:0015035) [0.951]	cell redox homeostasis (GO:0045454) [0.951]	NULL / Representative annotation below 0.1%
OG186	2	2	10	12	8	24	7	6	20	10	8	0	10	6	9	2	29	25	13	2	7	5	7	44	0	0	6	8	16	13	26	25	24	26	26	28	HXXXD-type acyl-transferase family protein [0.959] | 10-deacetylbaccatin III-10-O-acetyl transferase [0.019] | Transferase family protein [0.007] | Taxadienol acetyl transferase [0.004] | Transferase family [0.004] | Benzoyl coenzyme A benzyl alcohol benzoyl transferase [0.004] | Transferase, putative [0.004]	acetyl CoA:(Z)-3-hexen-1-ol acetyltransferase | HXXXD-type acyl-transferase family protein	Transferase family (PF02458) [0.985]	Transferase (IPR003480) [0.985]	transferase activity, transferring acyl groups other than amino-acyl groups (GO:0016747) [0.985]	NULL / Representative annotation below 0.1%	NULL / Representative annotation below 0.1%
OG187	18	9	10	24	12	17	12	8	15	13	16	10	11	5	10	6	7	13	12	4	3	3	7	4	11	8	1	1	56	47	48	48	92	579	565	724	MATE efflux family protein [1.000]	MATE efflux family protein	MatE (PF01554) [0.993] | Myb/SANT-like DNA-binding domain (PF12776) [0.004] | Protein kinase domain (PF00069) [0.004]	Multi antimicrobial extrusion protein (IPR002528) [0.993] | Myb/SANT-like domain (IPR024752) [0.004] | Protein kinase domain (IPR000719) [0.004]	antiporter activity (GO:0015297) [0.993] | drug transmembrane transporter activity (GO:0015238) [0.993] | ATP binding (GO:0005524) [0.004] | protein kinase activity (GO:0004672) [0.004]	transmembrane transport (GO:0055085) [0.993] | drug transmembrane transport (GO:0006855) [0.993] | protein phosphorylation (GO:0006468) [0.004]	membrane (GO:0016020) [0.993]
OG188	11	9	8	10	13	15	8	13	14	8	13	16	12	12	7	13	9	11	13	16	13	7	7	3	1	5	4	18	40	46	504	494	756	737	731	725	Formin-like protein [0.625] | Formin [0.094] | Formin-like protein 1 [0.067] | Formin homology 2 domain-containing family protein [0.041] | Formin-like protein 11 [0.015] | formin homology5 [0.011] | Formin-like protein 16 [0.011] | Formin-like protein 4 [0.011] | Formin-like protein 10 [0.011] | Formin-like protein 9 [0.011] | FH protein NFH1 [0.007] | Formin-like protein 2 [0.007] | Actin bindi…	Actin-binding FH2 (formin homology 2) family protein | formin homology5 | formin homolog 6 | formin homology 1 | formin homologue 4 | formin 8 | formin 3	Formin Homology 2 Domain (PF02181) [0.981] | E1-E2 ATPase (PF00122) [0.004] | Ca2+-ATPase N terminal autoinhibitory domain (PF12515) [0.004] | haloacid dehalogenase-like hydrolase (PF00702) [0.004] | Cation transporting ATPase, C-terminus (PF00689) [0.004] | Cation transporter/ATPase, N-terminus (PF00690) [0.004] | Lipase (class 3) (PF01764) [0.004]	Formin, FH2 domain (IPR015425) [0.981] | Cation-transporting P-type ATPase, C-terminal (IPR006068) [0.004] | Fungal lipase-like domain (IPR002921) [0.004] | Calcium-transporting P-type ATPase, N-terminal autoinhibitory domain (IPR024750) [0.004] | Cation-transporting P-type ATPase, N-terminal (IPR004014) [0.004] | P-type ATPase, A domain (IPR008250) [0.004]	calmodulin binding (GO:0005516) [0.004] | metal ion binding (GO:0046872) [0.004] | nucleotide binding (GO:0000166) [0.004]	lipid metabolic process (GO:0006629) [0.004]	NULL / Representative annotation below 0.1%
OG189	14	6	8	19	8	12	9	10	21	8	20	6	9	11	12	7	8	9	11	11	12	6	4	11	12	2	1	23	28	33	44	39	671	535	520	509	AMP-dependent synthetase and ligase family protein [0.335] | AMP dependent ligase, putative [0.229] | 2-succinylbenzoate-CoA ligase [0.192] | Cinnamate:CoA ligase [0.135] | Acyl-CoA synthetase [0.026] | Acyl coa ligase acetate-coa synthetase-like protein [0.023] | 2-succinylbenzoate--CoA ligase [0.019] | AMP-dependent synthetase and ligase family protein, putative, expressed [0.019] | Benzoate--C…	AMP-dependent synthetase and ligase family protein | acyl activating enzyme 12 | acyl activating enzyme 5 | acyl-activating enzyme 7 | acyl activating enzyme 1 | benzoyloxyglucosinolate 1	AMP-binding enzyme (PF00501) [0.996] | AMP-binding enzyme C-terminal domain (PF13193) [0.947] | Chitinase class I (PF00182) [0.004] | cAMP-regulated phosphoprotein/endosulfine conserved region (PF04667) [0.004]	AMP-dependent synthetase/ligase (IPR000873) [0.996] | AMP-binding enzyme C-terminal domain (IPR025110) [0.917] | AMP-binding enzyme, C-terminal domain (IPR025110) [0.030] | Endosulphine (IPR006760) [0.004] | Glycoside hydrolase, family 19, catalytic (IPR000726) [0.004]	catalytic activity (GO:0003824) [0.996] | chitinase activity (GO:0004568) [0.004]	metabolic process (GO:0008152) [0.996] | chitin catabolic process (GO:0006032) [0.004] | cell wall macromolecule catabolic process (GO:0016998) [0.004]	NULL / Representative annotation below 0.1%
OG190	12	10	10	7	14	13	8	17	17	8	10	15	9	9	7	12	6	10	10	23	13	6	7	0	4	8	74	69	65	458	338	376	369	622	494	482	Zinc finger family protein [0.117] | homeobox protein 22 [0.113] | homeobox protein 30 [0.106] | Zinc finger homeodomain protein 1 [0.079] | homeobox protein 21 [0.072] | Transcription factor, putative [0.064] | Zinc finger-homeodomain protein [0.064] | homeobox protein 31 [0.064] | Zinc finger-homeodomain protein 2 [0.049] | ZF-HD homeobox protein [0.042] | homeobox protein 34 [0.026] | Zinc fin…	homeobox protein 31 | homeobox protein 24 | homeobox protein 21 | homeobox protein 25 | zinc finger homeodomain 1 | homeobox protein 23 | homeobox protein 30 | homeobox protein 33 | homeobox protein 32 | homeobox protein 22 | homeobox protein 26 | homeobox protein 34	ZF-HD protein dimerisation region (PF04770) [0.966] | Homeobox domain (PF00046) [0.004]	ZF-HD homeobox protein, Cys/His-rich dimerisation domain (IPR006456) [0.966] | Homeobox domain (IPR001356) [0.004]	DNA binding (GO:0003677) [0.004]	NULL / Representative annotation below 0.1%	NULL / Representative annotation below 0.1%
OG191	9	7	13	14	10	10	6	11	12	5	12	6	10	14	3	10	11	10	7	15	5	5	11	37	4	7	1	1	1	1	2	1	1381	1390	1390	1409	Kinase family protein [0.330] | Protein kinase-like protein [0.231] | Mitogen-activated protein kinase kinase kinase, putative [0.117] | Protein kinase [0.091] | Protein kinase-like [0.042] | mitogen-activated protein kinase kinase kinase 19 [0.019] | protein kinase family protein [0.019] | NPKL1 [0.015] | Fertilization-related kinase 3 [0.015] | mitogen-activated protein kinase kinase kinase 21 …	mitogen-activated protein kinase kinase kinase 14 | mitogen-activated protein kinase kinase kinase 15 | mitogen-activated protein kinase kinase kinase 13 | mitogen-activated protein kinase kinase kinase 19 | mitogen-activated protein kinase kinase kinase 18 | mitogen-activated protein kinase kinase kinase 21 | mitogen-activated protein kinase kinase kinase 20 | mitogen-activated protein kinase ki…	Protein kinase domain (PF00069) [0.992] | Mitochondrial carrier protein (PF00153) [0.004] | Voltage-dependent anion channel (PF03595) [0.004]	Protein kinase domain (IPR000719) [0.992] | Voltage-dependent anion channel (IPR004695) [0.004] | Mitochondrial substrate/solute carrier (IPR018108) [0.004]	ATP binding (GO:0005524) [0.992] | protein kinase activity (GO:0004672) [0.992]	protein phosphorylation (GO:0006468) [0.992] | transmembrane transport (GO:0055085) [0.004]	integral component of membrane (GO:0016021) [0.004]
OG192	11	12	18	29	8	9	15	11	11	15	10	2	13	3	11	13	7	10	7	8	7	11	4	6	7	6	28	176	269	278	251	278	261	254	237	340	PLANT CADMIUM RESISTANCE 2 [0.720] | Protein PLANT CADMIUM RESISTANCE 6 [0.080] | Protein PLANT CADMIUM RESISTANCE 8 [0.061] | Protein PLANT CADMIUM RESISTANCE 12 [0.027] | Protein PLANT CADMIUM RESISTANCE 9 [0.019] | PLANT CADMIUM RESISTANCE 11 [0.019] | Protein PLANT CADMIUM RESISTANCE 4 [0.015] | Protein PLANT CADMIUM RESISTANCE 7 [0.015] | PLANT CADMIUM RESISTANCE 1 [0.015] | Protein PLANT CA…	PLAC8 family protein | PLANT CADMIUM RESISTANCE 1 | PLANT CADMIUM RESISTANCE 2 | PLANT CADMIUM RESISTANCE 11	PLAC8 family (PF04749) [0.973]	PLAC8 motif-containing protein (IPR006461) [0.973]	NULL / Representative annotation below 0.1%	NULL / Representative annotation below 0.1%	NULL / Representative annotation below 0.1%
OG193	11	13	10	3	7	13	16	5	12	6	11	2	8	7	13	12	10	18	14	7	17	4	9	18	7	10	11	13	12	9	13	11	17	25	43	48	Glucan endo-1,3-beta-glucosidase [0.757] | Beta-1,3-glucanase [0.110] | Glucan endo-1,3-beta-glucosidase, putative [0.034] | Glucan endo-1,3-beta-glucosidase 3 [0.015] | Beta-1 3-glucanase [0.011] | Beta 1,3-glucanase [0.011] | Endo-1,3-beta-glucanase [0.011] | Glucan endo-1,3-beta-glucosidase B [0.008] | Beta 1-3 glucanase [0.008] | Endo-beta-1,3-glucanase [0.008] | Beta 1,3 glucanase [0.008] | …	Glycosyl hydrolase superfamily protein | beta-1,3-glucanase 3 | beta-1,3-glucanase 2 | beta-1,3-glucanase 4 | beta-1,3-glucanase 1 | beta-1,3-glucanase 5	Glycosyl hydrolases family 17 (PF00332) [1.000] | X8 domain (PF07983) [0.008]	Glycoside hydrolase family 17 (IPR000490) [1.000] | X8 domain (IPR012946) [0.008]	hydrolase activity, hydrolyzing O-glycosyl compounds (GO:0004553) [1.000]	carbohydrate metabolic process (GO:0005975) [1.000]	NULL / Representative annotation below 0.1%
OG194	12	3	12	29	6	14	7	9	19	12	7	6	3	4	8	14	6	16	19	9	2	28	4	11	2	1	1	38	26	23	24	24	21	19	15	12	Cytochrome P450, putative [0.608] | Cytochrome P450 [0.152] | Cytochrome P450 family protein [0.129] | Cytochrome P450 89A2 [0.061] | Cytochrome P450 family protein, expressed [0.015] | Cytochrome P450 superfamily protein [0.011] | Cytochrome P450-like protein [0.008] | Cytochrome P450 89A9 [0.004] | Cytochrome P450-like [0.004] | cytochrome P450, family 87, subfamily A, polypeptide 7 [0.004] | C…	Cytochrome P450 superfamily protein | cytochrome P450, family 77, subfamily A, polypeptide 9 | cytochrome P450, family 87, subfamily A, polypeptide 7 | cytochrome P450, family 77, subfamily B, polypeptide 1 | cytochrome P450, family 77, subfamily A, polypeptide 4 | cytochrome P450, family 77, subfamily A, polypeptide 6 | cytochrome P450, family 87, subfamily A, polypeptide 6 | cytochrome P450, fa…	Cytochrome P450 (PF00067) [0.992] | Plant protein of unknown function (DUF863) (PF05904) [0.004]	Cytochrome P450 (IPR001128) [0.992] | Protein of unknown function DUF863, plant (IPR008581) [0.004]	oxidoreductase activity, acting on paired donors, with incorporation or reduction of molecular oxygen (GO:0016705) [0.992] | heme binding (GO:0020037) [0.992] | iron ion binding (GO:0005506) [0.992]	oxidation-reduction process (GO:0055114) [0.992]	NULL / Representative annotation below 0.1%
OG195	6	4	7	6	12	49	10	8	10	5	10	10	6	8	2	12	10	13	14	9	4	7	0	30	4	7	1	1	1	38	23	17	12	11	9	7	Heat shock 70 kDa protein [0.692] | 70 kDa heat shock protein [0.221] | heat shock protein 70 [0.027] | 70-kDa heat shock protein [0.019] | Heat shock 70 kDa protein, putative, expressed [0.011] | Heat shock protein 70 [0.011] | Heat shock 70 kDa protein homolog [0.004] | Luminal binding heat shock protein 70 [0.004] | alpha/beta-Hydrolases superfamily protein [0.004] | Heat shock protein 70 kDa …	Heat shock protein 70 (Hsp 70) family protein | heat shock protein 70B | heat shock protein 70 | heat shock protein 70 (Hsp 70) family protein | heat shock cognate protein 70-1	Hsp70 protein (PF00012) [0.962] | alpha/beta hydrolase fold (PF07859) [0.004]	Heat shock protein 70 family (IPR013126) [0.962] | Alpha/beta hydrolase fold-3 (IPR013094) [0.004]	hydrolase activity (GO:0016787) [0.004]	metabolic process (GO:0008152) [0.004]	NULL / Representative annotation below 0.1%
OG196	9	7	9	10	11	9	7	17	17	11	9	10	8	11	9	14	7	11	12	21	2	7	7	13	4	9	148	516	455	459	1342	1409	1464	1484	1495	1518	Cytokinin riboside 5'-monophosphate phosphoribohydrolase LOG [0.533] | Cytokinin riboside 5'-monophosphate phosphoribohydrolase-like [0.287] | Cytokinin riboside 5'-monophosphate phosphoribohydrolase [0.111] | Cytokinin riboside 5'-monophosphate phosphoribohydrolase LOG8 [0.031] | Cytokinin riboside monophosphate phosphoribohydrolase [0.015] | Lysine decarboxylase-like protein [0.011] | Cytokinin…	Putative lysine decarboxylase family protein | lysine decarboxylase family protein	Possible lysine decarboxylase (PF03641) [0.973] | Glutathione S-transferase, N-terminal domain (PF02798) [0.004] | Glutathione S-transferase, C-terminal domain (PF00043) [0.004]	LOG family (IPR031100) [0.973] | Glutathione S-transferase, N-terminal (IPR004045) [0.004] | Glutathione S-transferase, C-terminal (IPR004046) [0.004]	protein binding (GO:0005515) [0.004]	NULL / Representative annotation below 0.1%	NULL / Representative annotation below 0.1%
OG197	8	6	8	7	12	15	6	9	12	7	12	8	10	10	7	10	10	11	11	13	9	10	9	23	3	14	69	403	657	549	1042	1060	1072	793	793	1169	histone H4 [0.962] | Histone H4 [0.038]	Histone superfamily protein | histone H4	Centromere kinetochore component CENP-T histone fold (PF15511) [0.946] | Acetyltransferase (GNAT) domain (PF13302) [0.004] | Syntaxin 6, N-terminal (PF09177) [0.004]	CENP-T/Histone H4, histone fold (IPR035425) [0.038] | Syntaxin 6, N-terminal (IPR015260) [0.004] | GNAT domain (IPR000182) [0.004]	N-acetyltransferase activity (GO:0008080) [0.004]	Golgi vesicle transport (GO:0048193) [0.004]	membrane (GO:0016020) [0.004]
OG198	5	12	10	15	13	22	15	15	34	4	10	4	10	4	8	20	6	9	10	10	11	2	5	6	0	0	123	393	539	553	540	534	527	519	502	490	Wound-responsive family protein [0.881] | Wound induced protein [0.038] | WRKY DNA-binding protein 26 [0.004] | 50S ribosomal protein L5 [0.004] | Alanine--tRNA ligase [0.004] | Regulator of Vps4 activity in the MVB pathway protein [0.004] | Acetyl esterase [0.004] | Chemotaxis response regulator protein-glutamate methylesterase [0.004] | Imidazole glycerol phosphate synthase subunit HisH [0.004]…	Wound-responsive family protein	Wound-induced protein (PF12609) [0.973] | Reverse transcriptase-like (PF13456) [0.004]	Protein of unknown function wound-induced (IPR022251) [0.973]	NULL / Representative annotation below 0.1%	NULL / Representative annotation below 0.1%	NULL / Representative annotation below 0.1%
OG200	9	8	10	24	13	12	10	12	12	11	8	9	12	8	6	8	12	9	8	13	4	6	7	18	6	2	12	471	466	472	461	452	451	444	421	408	Oligopeptide transporter, putative [0.654] | Oligopeptide transporter [0.156] | oligopeptide transporter [0.148] | Oligopeptide transporter OPT family [0.016] | oligopeptide transporter 1 [0.008] | oligopeptide transporter 9 [0.004] | oligopeptide transporter 5 [0.004] | OLIGOPEPTIDE TRANSPORTER family protein [0.004] | oligopeptide transporter 2 [0.004] | oligopeptide transporter 8 [0.004]	oligopeptide transporter 1 | oligopeptide transporter 7 | oligopeptide transporter 8 | oligopeptide transporter 5 | oligopeptide transporter 9 | oligopeptide transporter 2 | oligopeptide transporter 4 | oligopeptide transporter	OPT oligopeptide transporter protein (PF03169) [1.000] | Hsp70 protein (PF00012) [0.004]	Oligopeptide transporter, OPT superfamily (IPR004813) [1.000] | Heat shock protein 70 family (IPR013126) [0.004]	NULL / Representative annotation below 0.1%	transmembrane transport (GO:0055085) [1.000]	NULL / Representative annotation below 0.1%
OG201	12	8	11	9	14	12	11	11	17	8	21	9	12	15	7	13	9	7	8	6	2	4	5	9	8	8	1	1	1	1	2	1	757	580	566	559	Beta-1,3-n-acetylglucosaminyltransferase radical fringe, putative [0.051] | Concanavalin A-like lectin protein kinase family protein [0.004] | Cellulose synthase [0.004]	Protein of unknown function (DUF604) | fringe-related protein	Protein of unknown function, DUF604 (PF04646) [0.992] | Fringe-like (PF02434) [0.012] | Carbohydrate-binding protein of the ER (PF12819) [0.008] | Cellulose synthase (PF03552) [0.004] | Protein kinase domain (PF00069) [0.004]	Protein of unknown function DUF604 (IPR006740) [0.992] | Fringe-like (IPR003378) [0.012] | Malectin-like carbohydrate-binding domain (IPR024788) [0.008] | Protein kinase domain (IPR000719) [0.004] | Cellulose synthase (IPR005150) [0.004]	transferase activity, transferring glycosyl groups (GO:0016757) [0.012] | ATP binding (GO:0005524) [0.004] | protein kinase activity (GO:0004672) [0.004] | cellulose synthase (UDP-forming) activity (GO:0016760) [0.004]	cellulose biosynthetic process (GO:0030244) [0.004] | protein phosphorylation (GO:0006468) [0.004]	membrane (GO:0016020) [0.016]
OG202	12	7	7	10	11	11	10	11	10	7	18	8	16	18	9	6	11	10	12	13	6	7	4	14	7	1	143	431	483	487	478	466	462	453	434	424	Pectinacetylesterase family protein [0.984] | Pectinacetylesterase [0.008] | Glutathione S-transferase [0.004] | Pectinacetylesterase family protein, expressed [0.004]	Pectinacetylesterase family protein	Pectinacetylesterase (PF03283) [1.000] | MiAMP1 (PF09117) [0.004] | Glutathione S-transferase, C-terminal domain (PF13410) [0.004] | Glutathione S-transferase, N-terminal domain (PF13417) [0.004]	Pectinacetylesterase/NOTUM (IPR004963) [1.000] | Antimicrobial protein MiAMP1 (IPR015201) [0.004] | Glutathione S-transferase, N-terminal (IPR004045) [0.004]	hydrolase activity (GO:0016787) [1.000] | protein binding (GO:0005515) [0.004]	defense response (GO:0006952) [0.004] | negative regulation of growth (GO:0045926) [0.004]	NULL / Representative annotation below 0.1%
OG203	12	5	13	35	9	13	13	23	17	12	20	4	6	6	6	3	9	13	9	9	7	4	0	5	1	2	127	500	509	515	426	414	403	389	456	448	Methyl jasmonate esterase [0.254] | methyl esterase 1 [0.207] | methyl esterase 10 [0.137] | methyl esterase 3 [0.090] | Chain A family protein [0.043] | (S)-hydroxynitrile lyase [0.035] | methyl esterase 7 [0.027] | Esterase PIR7B [0.027] | methyl esterase 9 [0.020] | Methylketone synthase Ib [0.020] | methyl esterase 5 [0.020] | Esterase PIR7A [0.012] | Alpha-hydroxynitrile lyase [0.012] | meth…	methyl esterase 8 | alpha/beta-Hydrolases superfamily protein | methyl esterase 5 | methyl esterase 6 | methyl esterase 3 | acetone-cyanohydrin lyase | methyl esterase 19 | methyl esterase 7 | methyl esterase 10 | methyl esterase 4 | methyl esterase 9 | methyl esterase 1	Alpha/beta hydrolase family (PF12697) [0.660] | alpha/beta hydrolase fold (PF00561) [0.188] | Serine aminopeptidase, S33 (PF12146) [0.020]	Alpha/beta hydrolase fold-1 (IPR000073) [0.844] | Serine aminopeptidase, S33 (IPR022742) [0.020]	NULL / Representative annotation below 0.1%	NULL / Representative annotation below 0.1%	NULL / Representative annotation below 0.1%
OG204	6	3	15	47	6	14	13	10	12	13	13	5	5	4	5	4	6	8	12	6	8	2	6	15	10	7	14	264	266	241	291	469	551	543	528	520	NAD(P)-linked oxidoreductase superfamily protein [0.976] | Aldo/keto reductase [0.012] | Aldo/keto-reductase family protein [0.008] | Oxidoreductase, aldo/keto reductase family protein [0.004]	NAD(P)-linked oxidoreductase superfamily protein	Aldo/keto reductase family (PF00248) [0.984]	NADP-dependent oxidoreductase domain (IPR023210) [0.984]	NULL / Representative annotation below 0.1%	NULL / Representative annotation below 0.1%	NULL / Representative annotation below 0.1%
OG205	6	6	6	6	10	13	5	10	8	5	13	5	11	7	6	18	9	19	20	24	12	9	6	15	2	4	93	189	215	194	161	175	225	210	196	194	Flowering locus T [0.141] | PEBP (phosphatidylethanolamine-binding protein) family protein [0.129] | Terminal flower 1 [0.129] | Phosphatidylethanolamine-binding protein, putative [0.090] | Flowering locus T-like protein [0.086] | Flowering locus T protein [0.043] | FLOWERING LOCUS T protein, putative [0.031] | Protein FLOWERING LOCUS T [0.031] | Mother of FT and TFL1-like protein [0.027] | CEN-l…	PEBP (phosphatidylethanolamine-binding protein) family protein | centroradialis	Phosphatidylethanolamine-binding protein (PF01161) [0.906]	Phosphatidylethanolamine-binding protein (IPR008914) [0.906]	NULL / Representative annotation below 0.1%	NULL / Representative annotation below 0.1%	NULL / Representative annotation below 0.1%
OG206	7	6	7	23	11	10	8	8	11	7	15	4	8	13	7	6	8	12	9	11	7	6	5	26	12	4	47	344	91	103	92	87	93	2012	2052	2083	Bidirectional sugar transporter SWEET1 [0.219] | Bidirectional sugar transporter SWEET4 [0.151] | Bidirectional sugar transporter SWEET6b [0.139] | Bidirectional sugar transporter SWEET5 [0.116] | Bidirectional sugar transporter SWEET2 [0.080] | Bidirectional sugar transporter SWEET2a [0.076] | Bidirectional sugar transporter SWEET7 [0.052] | Bidirectional sugar transporter SWEET7b [0.044] | Bidi…	Nodulin MtN3 family protein	Sugar efflux transporter for intercellular exchange (PF03083) [0.992] | AWPM-19-like family (PF05512) [0.004]	SWEET sugar transporter (IPR004316) [0.992] | AWPM-19-like (IPR008390) [0.004]	NULL / Representative annotation below 0.1%	NULL / Representative annotation below 0.1%	integral component of membrane (GO:0016021) [0.992]
OG207	7	8	8	6	12	23	8	15	14	11	14	10	10	8	8	10	10	7	12	12	12	4	6	6	5	5	70	80	61	63	35	37	151	127	129	121	Response regulator [0.231] | Two-component response regulator ARR2 [0.096] | Two-component response regulator ARR1 [0.092] | Two-component response regulator ARR2 family protein [0.088] | response regulator 2 [0.064] | Two-component response regulator ARR12 [0.056] | response regulator 1 [0.052] | Two-component response regulator ARR13 family protein [0.052] | Two-component response regulator ARR…	response regulator 10 | response regulator 1 | response regulator 2 | response regulator 18 | response regulator 11 | response regulator 12 | response regulator 14	Response regulator receiver domain (PF00072) [0.924] | Myb-like DNA-binding domain (PF00249) [0.725] | Reverse transcriptase-like (PF13456) [0.004]	Signal transduction response regulator, receiver domain (IPR001789) [0.924] | SANT/Myb domain (IPR001005) [0.725]	NULL / Representative annotation below 0.1%	phosphorelay signal transduction system (GO:0000160) [0.924]	NULL / Representative annotation below 0.1%
OG208	13	4	11	10	17	34	15	9	10	8	12	1	5	7	19	8	15	13	8	5	7	5	7	7	0	0	6	8	16	13	26	25	24	26	26	28	HXXXD-type acyl-transferase family protein [0.988] | N-hydroxycinnamoyl/benzoyltransferase [0.004] | Polyprotein [0.004] | Anthranilate N-hydroxycinnamoyl/benzoyltransferase [0.004]	HXXXD-type acyl-transferase family protein	Transferase family (PF02458) [0.984] | Salt stress response/antifungal (PF01657) [0.004]	Transferase (IPR003480) [0.984] | Gnk2-homologous domain (IPR002902) [0.004]	transferase activity, transferring acyl groups other than amino-acyl groups (GO:0016747) [0.984]	NULL / Representative annotation below 0.1%	NULL / Representative annotation below 0.1%
OG209	11	9	7	10	16	17	11	14	13	10	9	9	8	9	6	10	6	9	9	17	12	5	5	8	4	5	1	56	591	615	766	759	758	738	732	726	Pectin lyase-like superfamily protein [1.000]	Pectin lyase-like superfamily protein	Glycosyl hydrolases family 28 (PF00295) [0.988] | Pectate lyase superfamily protein (PF12708) [0.100] | Ribosomal protein 60S L18 and 50S L18e (PF17135) [0.004] | Cupin (PF00190) [0.004] | Ubiquitin-conjugating enzyme (PF00179) [0.004]	Glycoside hydrolase, family 28 (IPR000743) [0.988] | Pectate lyase superfamily protein (IPR024535) [0.100] | Ubiquitin-conjugating enzyme E2 (IPR000608) [0.004] | Ribosomal protein L18e/L15P (IPR021131) [0.004] | Cupin 1 (IPR006045) [0.004]	polygalacturonase activity (GO:0004650) [0.988] | nutrient reservoir activity (GO:0045735) [0.004]	carbohydrate metabolic process (GO:0005975) [0.988]	NULL / Representative annotation below 0.1%
OG210	8	7	7	14	8	9	11	10	8	5	8	4	10	9	6	11	11	12	11	10	5	1	15	13	20	16	1	416	1	59	34	21	15	13	16	11	Carbonic anhydrase, putative [0.598] | Carbonic anhydrase family protein [0.201] | Carbonic anhydrase [0.157] | Carbonic anhydrase-like protein (Precursor) [0.028] | Eukaryotic-type carbonic anhydrase family protein, expressed [0.004] | alpha carbonic anhydrase 5 [0.004] | Eukaryotic-type carbonic anhydrase [0.004] | alpha carbonic anhydrase 8 [0.004]	alpha carbonic anhydrase 6 | alpha carbonic anhydrase 8 | alpha carbonic anhydrase 3 | alpha carbonic anhydrase 2 | alpha carbonic anhydrase 7 | alpha carbonic anhydrase 5 | alpha carbonic anhydrase 4 | alpha carbonic anhydrase 1	Eukaryotic-type carbonic anhydrase (PF00194) [0.980]	Alpha carbonic anhydrase (IPR001148) [0.980]	NULL / Representative annotation below 0.1%	NULL / Representative annotation below 0.1%	NULL / Representative annotation below 0.1%
OG211	2	5	2	5	7	25	0	6	17	4	109	0	16	4	5	2	12	0	2	14	0	8	2	1	0	0	56	367	383	372	418	405	478	468	448	440	Protein ycf2 [0.891] | Ycf2 [0.073] | NADH dehydrogenase subunit [0.008] | Ycf2 protein [0.004] | TatD family deoxyribonuclease [0.004] | Long-chain-fatty-acid--[acyl-carrier-protein] ligase MbtM [0.004] | ATP synthase subunit delta, chloroplastic [0.004] | Yippee family putative zinc-binding protein [0.004] | Photosystem II reaction center protein H [0.004] | Exodeoxyribonuclease 7 large subunit…	Chloroplast Ycf2;ATPase, AAA type, core	Plant protein of unknown function (DUF825) (PF05695) [0.661] | ATPase family associated with various cellular activities (AAA) (PF00004) [0.089] | Chloroplast protein precursor Ycf15 putative (PF10705) [0.008] | NADH-dehyrogenase subunit F, TMs, (complex I) C-terminus (PF01010) [0.008] | Ulp1 protease family, C-terminal catalytic domain (PF02902) [0.004] | RNA polymerase Rpb2, domain 6 (PF00562) …	Uncharacterised protein family Ycf2 (IPR008543) [0.661] | ATPase, AAA-type, core (IPR003959) [0.089] | NADH:ubiquinone/plastoquinone oxidoreductase, chloroplast chain 5, C-terminal (IPR002128) [0.008] | Uncharacterised protein family Ycf15 (IPR019645) [0.008] | RNA polymerase Rpb2, domain 2 (IPR007642) [0.004] | DNA-directed RNA polymerase, subunit 2, domain 6 (IPR007120) [0.004] | Ulp1 protease …	ATP binding (GO:0005524) [0.698] | cysteine-type peptidase activity (GO:0008234) [0.004] | DNA binding (GO:0003677) [0.004] | phosphate ion binding (GO:0042301) [0.004] | DNA-directed 5'-3' RNA polymerase activity (GO:0003899) [0.004]	photosynthesis (GO:0015979) [0.004] | transcription, DNA-templated (GO:0006351) [0.004] | proteolysis (GO:0006508) [0.004] | protein stabilization (GO:0050821) [0.004]	chloroplast (GO:0009507) [0.661] | membrane (GO:0016020) [0.004] | photosystem II (GO:0009523) [0.004]
OG212	10	6	8	12	16	14	8	16	17	6	12	13	9	11	7	6	5	10	12	22	11	6	4	1	2	4	1	688	540	554	462	657	2074	2158	2222	2273	Unkown protein / Representative AHRD below 0.1%	Protein of unknown function (DUF640)	Protein of unknown function (DUF640) (PF04852) [1.000] | Isochorismatase family (PF00857) [0.004]	ALOG domain (IPR006936) [1.000] | Isochorismatase-like (IPR000868) [0.004]	catalytic activity (GO:0003824) [0.004]	metabolic process (GO:0008152) [0.004]	NULL / Representative annotation below 0.1%
OG213	12	5	7	34	7	12	13	10	23	12	11	2	11	6	7	6	8	9	8	7	11	3	15	5	1	2	20	1	21	259	270	257	245	332	460	560	Zinc-binding dehydrogenase family protein [0.980] | Oxidoreductase, zinc-binding dehydrogenase family protein [0.020]	Zinc-binding dehydrogenase family protein | alkenal reductase	Zinc-binding dehydrogenase (PF00107) [0.911] | N-terminal domain of oxidoreductase (PF16884) [0.826] | Glycosyl hydrolases family 28 (PF00295) [0.008] | UDP-glucoronosyl and UDP-glucosyl transferase (PF00201) [0.004]	Alcohol dehydrogenase, C-terminal (IPR013149) [0.911] | Glycoside hydrolase, family 28 (IPR000743) [0.008] | UDP-glucuronosyl/UDP-glucosyltransferase (IPR002213) [0.004]	polygalacturonase activity (GO:0004650) [0.008] | transferase activity, transferring hexosyl groups (GO:0016758) [0.004]	oxidation-reduction process (GO:0055114) [0.911] | carbohydrate metabolic process (GO:0005975) [0.008] | metabolic process (GO:0008152) [0.004]	NULL / Representative annotation below 0.1%
OG214	12	8	9	10	12	12	10	11	13	8	8	7	9	11	7	10	9	9	9	9	5	9	9	18	6	7	1	12	9	11	8	5	8	9	11	15	Endoglucanase [0.389] | Endoglucanase 1 [0.368] | Endoglucanase 4 [0.073] | Endoglucanase 23 [0.036] | Endoglucanase 24 [0.020] | Endoglucanase 6 [0.008] | Cellulase family protein [0.008] | Endoglucanase 19 [0.008] | Endoglucanase 3 [0.008] | Endoglucanase 17 [0.008] | Endo-beta-1,4-glucanase [0.008] | Endo-1,4-beta-glucanase, putative [0.008] | Endoglucanase 20 [0.004] | Endo-1,4-beta-glucanase…	glycosyl hydrolase 9B13 | glycosyl hydrolase 9A4 | glycosyl hydrolase 9B6 | glycosyl hydrolase 9B15 | cellulase 3 | glycosyl hydrolase 9B18 | glycosyl hydrolase 9B1 | cellulase 5 | glycosyl hydrolase 9B14 | cellulase 2 | glycosyl hydrolase 9B17 | glycosyl hydrolase 9B16	Glycosyl hydrolase family 9 (PF00759) [1.000] | Region found in RelA / SpoT proteins (PF04607) [0.004]	Glycoside hydrolase family 9 (IPR001701) [1.000] | RelA/SpoT (IPR007685) [0.004]	hydrolase activity, hydrolyzing O-glycosyl compounds (GO:0004553) [1.000]	carbohydrate metabolic process (GO:0005975) [1.000] | guanosine tetraphosphate metabolic process (GO:0015969) [0.004]	NULL / Representative annotation below 0.1%
OG215	9	2	19	21	6	19	17	14	14	11	10	3	7	9	8	14	20	4	8	3	7	2	11	5	4	0	18	7	93	78	68	637	636	1066	1060	1064	P-loop containing nucleoside triphosphate hydrolases superfamily protein [0.992] | Mitochondrial chaperone BCS1 [0.004] | Oligosaccharyltransferase complex subunit OSTC [0.004]	P-loop containing nucleoside triphosphate hydrolases superfamily protein | cytochrome BC1 synthesis	ATPase family associated with various cellular activities (AAA) (PF00004) [0.866] | Domain associated at C-terminal with AAA (PF14363) [0.777] | GDSL/SGNH-like Acyl-Esterase family found in Pmr5 and Cas1p (PF13839) [0.004] | SAM dependent carboxyl methyltransferase (PF03492) [0.004] | Protein tyrosine kinase (PF07714) [0.004] | OST3 / OST6 family, transporter family (PF04756) [0.004] | Sec7 domai…	ATPase, AAA-type, core (IPR003959) [0.866] | AAA-type ATPase, N-terminal domain (IPR025753) [0.777] | Oligosaccharyl transferase complex, subunit OST3/OST6 (IPR021149) [0.004] | PC-Esterase (IPR026057) [0.004] | Serine-threonine/tyrosine-protein kinase, catalytic domain (IPR001245) [0.004] | SAM dependent carboxyl methyltransferase (IPR005299) [0.004] | Sec7 domain (IPR000904) [0.004]	ATP binding (GO:0005524) [0.866] | methyltransferase activity (GO:0008168) [0.004] | protein kinase activity (GO:0004672) [0.004] | ARF guanyl-nucleotide exchange factor activity (GO:0005086) [0.004]	protein phosphorylation (GO:0006468) [0.004] | regulation of ARF protein signal transduction (GO:0032012) [0.004]	NULL / Representative annotation below 0.1%
OG216	10	8	8	14	12	12	8	13	18	10	10	10	7	5	8	10	10	10	12	15	11	9	6	4	2	4	6	127	97	100	118	524	517	788	787	614	Aquaporin 1 [0.122] | Aquaporin TIP3-1 [0.118] | Tonoplast intrinsic protein [0.106] | Tonoplast intrinsic protein, putative [0.089] | tonoplast intrinsic protein 1;3 [0.085] | Aquaporin-like protein [0.077] | Aquaporin TIP4.1 family protein [0.053] | Aquaporin TIP4-1 [0.045] | Tonoplast intrinsic protein 1;1 [0.045] | Tonoplast intrinsic protein 5.1 [0.045] | Aquaporin [0.037] | Tonoplast intrin…	tonoplast intrinsic protein 2;3 | beta-tonoplast intrinsic protein | tonoplast intrinsic protein 4;1 | tonoplast intrinsic protein 2;2 | Aquaporin-like superfamily protein | delta tonoplast integral protein | tonoplast intrinsic protein 5;1 | tonoplast intrinsic protein 2 | tonoplast intrinsic protein 1;3 | gamma tonoplast intrinsic protein	Major intrinsic protein (PF00230) [1.000]	Major intrinsic protein (IPR000425) [1.000]	transporter activity (GO:0005215) [1.000]	transport (GO:0006810) [1.000]	membrane (GO:0016020) [1.000]
OG217	7	8	14	14	8	12	7	13	14	10	8	6	23	9	8	9	8	9	11	12	7	4	7	12	4	2	41	55	274	250	227	212	203	193	180	178	Beta xylosidase [0.309] | beta-xylosidase 1 [0.175] | Glycosyl hydrolase family protein [0.154] | Beta-xylosidase [0.098] | beta-xylosidase 3 [0.089] | Beta-xylosidase 4 [0.045] | Beta-D-xylosidase [0.037] | Beta-xylosidase, putative [0.028] | Xylosidase [0.024] | Xylan 1 4-beta-xylosidase [0.020] | beta-xylosidase 2 [0.004] | beta-D-xylosidase 4 [0.004] | Beta-1,4-xylosidase [0.004] | Beta-xylos…	Glycosyl hydrolase family protein | beta-xylosidase 3 | beta-xylosidase 2 | beta-xylosidase 1 | beta-D-xylosidase 4	Glycosyl hydrolase family 3 C-terminal domain (PF01915) [0.988] | Glycosyl hydrolase family 3 N terminal domain (PF00933) [0.980] | Fibronectin type III-like domain (PF14310) [0.907] | Epidermal patterning factor proteins (PF17181) [0.004]	Glycoside hydrolase family 3 C-terminal domain (IPR002772) [0.988] | Glycoside hydrolase, family 3, N-terminal (IPR001764) [0.980] | Fibronectin type III-like domain (IPR026891) [0.907]	hydrolase activity, hydrolyzing O-glycosyl compounds (GO:0004553) [1.000]	carbohydrate metabolic process (GO:0005975) [1.000]	NULL / Representative annotation below 0.1%
OG218	2	5	11	2	7	34	26	23	15	7	8	3	3	3	16	7	4	10	6	4	16	7	12	5	3	6	75	166	171	170	238	224	1112	1168	1169	863	BURP domain-containing protein [0.865] | BURP domain protein [0.037] | Embryonic abundant protein-like protein [0.024] | Embryonic abundant protein USP92 [0.012] | RAFTIN 1 [0.008] | BURP domain-containing protein 1 [0.004] | BURP domain-containing protein 5 [0.004] | Polygalacturonase-1 non-catalytic subunit beta [0.004] | BURP domain-containing protein 6 [0.004] | F-box/RNI-like/FBD-like domain…	BURP domain-containing protein | unknown seed protein like 1	BURP domain (PF03181) [0.988]	BURP domain (IPR004873) [0.988]	NULL / Representative annotation below 0.1%	NULL / Representative annotation below 0.1%	NULL / Representative annotation below 0.1%
OG219	8	6	12	21	8	16	5	7	12	8	10	5	17	8	6	8	16	14	16	7	4	3	3	21	2	2	24	591	631	661	1061	1082	1097	1098	1093	1098	Fatty acyl-CoA reductase [0.478] | Fatty acyl-CoA reductase 2 [0.351] | Fatty acyl-CoA reductase 1 [0.086] | Fatty acyl coA reductase [0.061] | Fatty acyl-CoA reductase 8 [0.008] | Geranylgeranylglyceryl phosphate synthase [0.004] | ATP-dependent Clp protease proteolytic subunit [0.004] | Fatty acyl-CoA reductase 3 [0.004] | Acyl CoA reductase family protein [0.004]	Jojoba acyl CoA reductase-related male sterility protein | fatty acid reductase 4 | fatty acid reductase 5 | fatty acid reductase 1 | fatty acid reductase 7 | fatty acid reductase 6 | fatty acid reductase 8	Male sterility protein (PF07993) [0.927] | Male sterility protein (PF03015) [0.804] | RNA recognition motif. (a.k.a. RRM, RBD, or RNP domain) (PF00076) [0.004] | Enhancer of rudimentary (PF01133) [0.004]	Male sterility, NAD-binding (IPR013120) [0.927] | Fatty acyl-CoA reductase, C-terminal (IPR033640) [0.804] | Enhancer of rudimentary (IPR000781) [0.004] | RNA recognition motif domain (IPR000504) [0.004]	nucleic acid binding (GO:0003676) [0.004]	pyrimidine nucleotide biosynthetic process (GO:0006221) [0.004] | cell cycle (GO:0007049) [0.004] | positive regulation of Notch signaling pathway (GO:0045747) [0.004]	NULL / Representative annotation below 0.1%
OG220	15	10	7	11	13	13	7	10	11	16	11	8	11	11	8	11	8	12	10	14	7	6	4	5	2	3	1	1	57	81	83	71	63	54	51	56	myosin, putative [0.287] | Myosin XI, putative [0.176] | myosin 2 [0.143] | Myosin family protein, putative, expressed [0.115] | Myosin XI [0.070] | Myosin-11 [0.066] | Myosin, putative, expressed [0.016] | Myosin XI-2 [0.012] | myosin-like protein XIF [0.012] | myosin 1 [0.012] | Myosin-J heavy chain [0.012] | Myosin-17 [0.008] | Myosin-7 [0.008] | Myosin XI-K [0.004] | myosin XI A [0.004] | Pla…	Myosin family protein with Dil domain | myosin, putative | myosin XI D | myosin 2 | myosin 1 | myosin-like protein XIG | P-loop containing nucleoside triphosphate hydrolases superfamily protein | myosin XI B | myosin-like protein XIF | myosin XI A	Myosin head (motor domain) (PF00063) [0.881] | IQ calmodulin-binding motif (PF00612) [0.824] | DIL domain (PF01843) [0.775] | Myosin N-terminal SH3-like domain (PF02736) [0.693] | Skp1 family, dimerisation domain (PF01466) [0.004] | Williams-Beuren syndrome DDT (WSD), D-TOX E motif (PF15613) [0.004] | WSTF, HB1, Itc1p, MBD9 motif 1 (PF15612) [0.004] | DDT domain (PF02791) [0.004] | Protein tyrosi…	Myosin head, motor domain (IPR001609) [0.881] | IQ motif, EF-hand binding site (IPR000048) [0.824] | Dilute domain (IPR002710) [0.775] | Myosin, N-terminal, SH3-like (IPR004009) [0.693] | Ribosome recycling factor domain (IPR023584) [0.004] | DDT domain (IPR018501) [0.004] | Serine-threonine/tyrosine-protein kinase, catalytic domain (IPR001245) [0.004] | WHIM2 domain (IPR028941) [0.004] | SKP1 co…	ATP binding (GO:0005524) [0.881] | motor activity (GO:0003774) [0.881] | protein binding (GO:0005515) [0.824] | protein kinase activity (GO:0004672) [0.004] | DNA binding (GO:0003677) [0.004]	regulation of transcription, DNA-templated (GO:0006355) [0.004] | ubiquitin-dependent protein catabolic process (GO:0006511) [0.004] | protein phosphorylation (GO:0006468) [0.004]	myosin complex (GO:0016459) [0.881]
OG221	6	10	5	29	9	15	21	15	11	19	9	9	6	20	4	4	7	9	6	6	3	2	3	4	9	3	2	108	85	132	197	208	200	191	176	175	Alcohol dehydrogenase, putative [0.738] | Cinnamyl alcohol dehydrogenase [0.119] | Cinnamyl-alcohol dehydrogenase family protein [0.082] | Alcohol dehydrogenase [0.020] | Cinnamyl alcohol dehydrogenase-like protein [0.008] | Cinnamyl-alcohol dehydrogenase [0.008] | cinnamyl alcohol dehydrogenase homolog 3 [0.004] | cinnamyl alcohol dehydrogenase 6 [0.004] | cinnamyl-alcohol dehydrogenase [0.004] …	cinnamyl alcohol dehydrogenase 6 | cinnamyl alcohol dehydrogenase homolog 3 | elicitor-activated gene 3-1 | cinnamyl alcohol dehydrogenase 9 | cinnamyl alcohol dehydrogenase homolog 2 | elicitor-activated gene 3-2	Alcohol dehydrogenase GroES-like domain (PF08240) [1.000] | Zinc-binding dehydrogenase (PF00107) [0.939] | D-isomer specific 2-hydroxyacid dehydrogenase, NAD binding domain (PF02826) [0.008] | Tripartite tricarboxylate transporter family receptor (PF03401) [0.004] | Tripartite tricarboxylate transporter TctA family (PF01970) [0.004] | Protein of unknown function (DUF2568) (PF10823) [0.004] | Prot…	Alcohol dehydrogenase, N-terminal (IPR013154) [1.000] | Alcohol dehydrogenase, C-terminal (IPR013149) [0.939] | D-isomer specific 2-hydroxyacid dehydrogenase, NAD-binding domain (IPR006140) [0.008] | Protein of unknown function DUF677 (IPR007749) [0.004] | Bordetella uptake gene (IPR005064) [0.004] | Protein of unknown function DUF112, transmembrane (IPR002823) [0.004] | Protein of unknown functi…	NAD binding (GO:0051287) [0.008]	oxidation-reduction process (GO:0055114) [1.000]	outer membrane-bounded periplasmic space (GO:0030288) [0.004]
OG222	10	6	8	20	8	13	10	12	15	6	9	10	15	5	12	4	9	12	12	7	11	3	4	9	7	6	30	13	12	9	339	273	228	429	345	336	Phosphate transporter [0.872] | phosphate transporter 1;1 [0.070] | Phosphate transporter family protein [0.037] | Phosphate transporter 1 [0.012] | Inorganic phosphate transporter [0.004] | Phosphate transporter protein [0.004]	phosphate transporter 1;3 | phosphate transporter 1;4 | phosphate transporter 1;5 | phosphate transporter 1;1 | phosphate transporter 1;9 | Major facilitator superfamily protein | phosphate transporter 1;6 | phosphate transporter 1;7 | phosphate transporter 2 | phosphate transporter 1;8	Sugar (and other) transporter (PF00083) [1.000] | Histone acetyltransferase subunit NuA4 (PF09340) [0.004]	Major facilitator, sugar transporter-like (IPR005828) [1.000] | Chromatin modification-related protein Eaf6 (IPR015418) [0.004]	transmembrane transporter activity (GO:0022857) [1.000]	transmembrane transport (GO:0055085) [1.000] | histone acetylation (GO:0016573) [0.004]	integral component of membrane (GO:0016021) [1.000] | histone acetyltransferase complex (GO:0000123) [0.004]
OG223	11	7	8	9	10	9	7	16	15	8	11	9	11	11	10	8	9	10	11	28	11	5	5	1	2	0	5	2	2	385	432	420	416	1437	1440	1461	basic helix-loop-helix (bHLH) DNA-binding superfamily protein [0.988] | Transcription factor, putative [0.004] | Pectin lyase-like superfamily protein [0.004] | Transcription factor bHLH68 [0.004]	basic helix-loop-helix (bHLH) DNA-binding superfamily protein	Helix-loop-helix DNA-binding domain (PF00010) [0.008]	Myc-type, basic helix-loop-helix (bHLH) domain (IPR011598) [0.008]	protein dimerization activity (GO:0046983) [0.008]	NULL / Representative annotation below 0.1%	NULL / Representative annotation below 0.1%
OG224	11	8	8	9	9	8	8	16	16	8	11	8	11	14	7	8	7	9	10	25	11	5	5	7	2	1	68	217	205	229	214	196	295	233	221	215	Actin-depolymerizing factor [0.459] | Actin depolymerizing factor [0.252] | Actin-depolymerizing factor family protein [0.140] | Actin depolymerizing factor, putative [0.116] | Actin-depolymerizing factor 5 [0.008] | actin depolymerizing factor 5 [0.008] | Actin depolymerizing factor-like protein [0.008] | Actin-depolymerizing factor 3 [0.004] | actin depolymerizing factor 9 [0.004]	actin depolymerizing factor 5 | actin depolymerizing factor 2 | actin depolymerizing factor 9 | actin depolymerizing factor 3 | actin depolymerizing factor 6 | actin depolymerizing factor 4 | actin depolymerizing factor 7 | actin depolymerizing factor 10 | actin depolymerizing factor 11 | actin depolymerizing factor 1 | actin depolymerizing factor 8	Cofilin/tropomyosin-type actin-binding protein (PF00241) [1.000] | Zinc finger, C3HC4 type (RING finger) (PF13920) [0.004]	Actin-depolymerising factor homology domain (IPR002108) [1.000]	actin binding (GO:0003779) [1.000]	NULL / Representative annotation below 0.1%	intracellular (GO:0005622) [1.000]
OG225	9	6	5	18	9	11	7	10	14	10	10	8	8	5	7	8	10	18	22	14	2	4	12	9	2	3	12	920	1110	1202	1343	1410	1465	1485	1496	1519	YELLOW STRIPE like 7 [0.332] | YELLOW STRIPE like 6 [0.145] | Yellow stripe-like protein [0.112] | Yellow stripe-like transporter 1 [0.104] | Yellow stripe-like transporter 11 [0.095] | YELLOW STRIPE like 5 [0.050] | Iron-phytosiderophore transporter yellow stripe 1 [0.025] | YELLOW STRIPE like 3 [0.021] | Yellow stripe-like transporter 3.1 [0.017] | Yellow stripe-like transporter 6 [0.017] | YEL…	YELLOW STRIPE like 4 | YELLOW STRIPE like 5 | YELLOW STRIPE like 7 | YELLOW STRIPE like 8 | YELLOW STRIPE like 6 | YELLOW STRIPE like 1 | YELLOW STRIPE like 3 | YELLOW STRIPE like 2 | Oligopeptide transporter OPT superfamily protein	OPT oligopeptide transporter protein (PF03169) [0.992]	Oligopeptide transporter, OPT superfamily (IPR004813) [0.992]	NULL / Representative annotation below 0.1%	transmembrane transport (GO:0055085) [0.992]	NULL / Representative annotation below 0.1%
OG226	11	7	6	9	11	12	8	13	10	11	7	9	11	14	11	7	5	13	13	16	4	6	5	11	3	8	70	93	368	175	193	408	399	383	1743	1771	response regulator 9 [0.249] | Response regulator [0.195] | Response regulator protein [0.120] | response regulator 3 [0.104] | response regulator 17 [0.041] | response regulator 5 [0.037] | Response regulator 7 [0.033] | response regulator 6 [0.025] | A-type response regulator [0.025] | Response regulator receiver [0.021] | Two-component response regulator ARR9, putative [0.017] | Two-component …	response regulator 3 | response regulator 15 | response regulator 9 | response regulator 5 | response regulator 17 | response regulator 7 | response regulator 4 | response regulator 6 | two-component responsive regulator-related / response regulator protein-related | response regulator 16	Response regulator receiver domain (PF00072) [0.954] | Hpt domain (PF01627) [0.004]	Signal transduction response regulator, receiver domain (IPR001789) [0.954] | Signal transduction histidine kinase, phosphotransfer (Hpt) domain (IPR008207) [0.004]	signal transducer activity (GO:0004871) [0.004]	phosphorelay signal transduction system (GO:0000160) [0.954]	NULL / Representative annotation below 0.1%
OG227	11	9	9	7	12	8	9	14	14	11	9	7	11	11	10	11	7	11	11	11	6	9	7	3	7	6	28	186	144	794	831	827	832	810	810	805	Galactosyltransferase family protein [0.768] | Beta-1,3-galactosyltransferase sqv-2, putative [0.137] | Beta-1,3-galactosyltransferase 7 [0.041] | Beta-1,3-galactosyltransferase sqv-2 [0.033] | Beta 1,3-glycosyltransferase-like protein II [0.008] | Galactosyltransferase family protein, expressed [0.008] | Beta-1,3-galactosyltransferase 1 [0.004]	Galactosyltransferase family protein	Galactosyltransferase (PF01762) [0.975] | Domain of unknown function (DUF4094) (PF13334) [0.859] | AP2 domain (PF00847) [0.004] | Senescence regulator (PF04520) [0.004]	Glycosyl transferase, family 31 (IPR002659) [0.975] | Domain of unknown function DUF4094 (IPR025298) [0.859] | Senescence regulator S40 (IPR007608) [0.004] | AP2/ERF domain (IPR001471) [0.004]	galactosyltransferase activity (GO:0008378) [0.975] | transcription factor activity, sequence-specific DNA binding (GO:0003700) [0.004]	protein glycosylation (GO:0006486) [0.975] | regulation of transcription, DNA-templated (GO:0006355) [0.004]	membrane (GO:0016020) [0.975]
OG228	12	7	10	7	10	11	8	15	14	6	14	8	11	7	8	11	12	12	10	14	13	4	8	1	3	3	1	39	102	94	99	1603	1211	1212	1212	1223	Unkown protein / Representative AHRD below 0.1%	Protein of unknown function, DUF617	Protein of unknown function, DUF617 (PF04759) [1.000]	Protein MIZU-KUSSEI 1-like, plant (IPR006460) [1.000]	NULL / Representative annotation below 0.1%	NULL / Representative annotation below 0.1%	NULL / Representative annotation below 0.1%
OG229	12	8	12	7	17	34	18	12	28	5	2	8	24	9	1	6	11	2	3	10	2	6	2	0	0	0	6	8	16	13	26	25	24	1576	836	832	HXXXD-type acyl-transferase family protein [0.946] | Malonyl CoA:anthocyanin 5-O-glucoside-6'''-O-malonyltransferase [0.017] | Anthocyanin 5-aromatic acyltransferase, putative [0.008] | Anthocyanin 5-aromatic acyltransferase [0.008] | Malonyl-CoA isoflavone 7-O-glucoside-6'-O-malonyltransferase [0.004] | Anthocyanidin 3-O-glucoside-6''-O-malonyltransferase [0.004] | Isoflavonoid malonyl transfera…	HXXXD-type acyl-transferase family protein | anthocyanin 5-aromatic acyltransferase 1	Transferase family (PF02458) [0.967] | Plant protein of unknown function (PF03140) [0.004] | mTERF (PF02536) [0.004]	Transferase (IPR003480) [0.967] | Protein of unknown function DUF247, plant (IPR004158) [0.004] | Transcription termination factor, mitochondrial/chloroplastic (IPR003690) [0.004]	transferase activity, transferring acyl groups other than amino-acyl groups (GO:0016747) [0.967] | double-stranded DNA binding (GO:0003690) [0.004]	regulation of transcription, DNA-templated (GO:0006355) [0.004]	NULL / Representative annotation below 0.1%
OG230	10	6	7	10	11	9	7	12	15	7	12	10	11	11	9	10	7	14	15	16	10	7	5	1	2	4	12	2	145	174	138	138	147	154	136	117	bZIP transcription factor family protein [0.492] | BZIP transcription factor [0.164] | BZIP family transcription factor family protein [0.101] | TGA transcription factor [0.097] | Transcription factor, putative [0.084] | Transcription factor TGA6 [0.017] | Transcription factor TGA7 family protein [0.008] | Transcription factor TGA1 [0.008] | Leucine-zipper transcription factor [0.004] | Transcrip…	bZIP transcription factor family protein | TGA1A-related gene 3 | TGACG motif-binding factor 6 | OCS-element binding factor 5 | TGACG motif-binding factor 4	Seed dormancy control (PF14144) [0.979] | bZIP transcription factor (PF00170) [0.828] | Basic region leucine zipper (PF07716) [0.088]	Transcription factor TGA like domain (IPR025422) [0.979] | Basic-leucine zipper domain (IPR004827) [0.916]	sequence-specific DNA binding (GO:0043565) [0.987] | transcription factor activity, sequence-specific DNA binding (GO:0003700) [0.916]	transcription, DNA-templated (GO:0006351) [0.979] | regulation of transcription, DNA-templated (GO:0006355) [0.916]	NULL / Representative annotation below 0.1%
OG231	12	7	8	9	9	9	9	15	13	5	13	14	12	9	9	10	9	7	6	12	14	5	4	3	4	11	1	28	395	388	373	353	347	339	331	318	14-3-3-like protein [0.471] | 14-3-3 protein, putative [0.248] | 14-3-3 protein [0.210] | 14-3-3 protein-like protein [0.038] | 14-3-3 family protein [0.017] | 14-3-3-like family protein [0.013] | 14-3-3 protein 3 [0.004]	general regulatory factor 3 | general regulatory factor 5 | general regulatory factor 8 | general regulatory factor 10 | general regulatory factor 9 | general regulatory factor 1 | GF14 protein phi chain | general regulatory factor 7 | general regulatory factor 11 | G-box regulating factor 6 | general regulatory factor 12 | general regulatory factor 2	14-3-3 protein (PF00244) [1.000] | Ubiquitin-conjugating enzyme (PF00179) [0.004]	14-3-3 domain (IPR023410) [1.000] | Ubiquitin-conjugating enzyme E2 (IPR000608) [0.004]	NULL / Representative annotation below 0.1%	NULL / Representative annotation below 0.1%	NULL / Representative annotation below 0.1%
OG232	12	8	8	13	13	17	9	14	15	10	9	8	9	10	7	6	5	9	12	18	3	5	6	2	2	8	1	2	2	2	28	19	6	32	40	46	Plasma membrane ATPase [0.601] | H(+)-ATPase 11 [0.097] | H+-ATPase family protein [0.067] | H-ATPase [0.050] | Plasma membrane H+-ATPase [0.042] | ATPase 6 family protein [0.042] | H(+)-ATPase 8 [0.021] | H(+)-ATPase 4 [0.017] | Plasma membrane H+ ATPase [0.013] | H(\+)-transporting atpase plant/fungi plasma membrane type, putative [0.008] | Plasma membrane ATPase 1 [0.008] | H+-ATPase [0.008] |…	H(+)-ATPase 5 | H(+)-ATPase 3 | autoinhibited H(+)-ATPase isoform 10 | H(+)-ATPase 7 | H(+)-ATPase 4 | H(+)-ATPase 2 | Cation transporter/ E1-E2 ATPase family protein | H(+)-ATPase 11 | H(+)-ATPase 1 | H(+)-ATPase 6 | H(+)-ATPase 9 | H(+)-ATPase 8	haloacid dehalogenase-like hydrolase (PF00702) [0.924] | E1-E2 ATPase (PF00122) [0.920] | Cation transporter/ATPase, N-terminus (PF00690) [0.908] | PPR repeat (PF01535) [0.004] | Cation transport ATPase (P-type) (PF13246) [0.004] | PPR repeat family (PF13041) [0.004] | DYW family of nucleic acid deaminases (PF14432) [0.004] | Leucine rich repeat (PF13855) [0.004] | Leucine rich repeat N-terminal …	Cation-transporting P-type ATPase, N-terminal (IPR004014) [0.908] | P-type ATPase, A domain (IPR008250) [0.887] | Pentatricopeptide repeat (IPR002885) [0.004] | DYW domain (IPR032867) [0.004] | Leucine-rich repeat-containing N-terminal, plant-type (IPR013210) [0.004] | Serine-threonine/tyrosine-protein kinase, catalytic domain (IPR001245) [0.004] | Cytochrome P450 (IPR001128) [0.004] | Leucine-ri…	nucleotide binding (GO:0000166) [0.887] | metal ion binding (GO:0046872) [0.887] | heme binding (GO:0020037) [0.004] | zinc ion binding (GO:0008270) [0.004] | protein kinase activity (GO:0004672) [0.004] | protein binding (GO:0005515) [0.004] | oxidoreductase activity, acting on paired donors, with incorporation or reduction of molecular oxygen (GO:0016705) [0.004] | iron ion binding (GO:0005506)…	oxidation-reduction process (GO:0055114) [0.004] | protein phosphorylation (GO:0006468) [0.004]	NULL / Representative annotation below 0.1%
OG233	19	10	11	36	8	10	7	15	12	17	12	4	6	6	11	7	7	6	8	5	1	3	5	6	2	3	30	40	43	43	41	45	53	55	80	77	Major facilitator superfamily protein [0.983] | Sugar transporter family protein [0.013] | Major facilitator superfamily sugar transporter-like protein [0.004]	Major facilitator superfamily protein | ERD (early response to dehydration) six-like 1	Sugar (and other) transporter (PF00083) [0.987] | Protein kinase domain (PF00069) [0.004]	Major facilitator, sugar transporter-like (IPR005828) [0.987] | Protein kinase domain (IPR000719) [0.004]	transmembrane transporter activity (GO:0022857) [0.987] | protein kinase activity (GO:0004672) [0.004] | ATP binding (GO:0005524) [0.004]	transmembrane transport (GO:0055085) [0.987] | protein phosphorylation (GO:0006468) [0.004]	integral component of membrane (GO:0016021) [0.987]
OG234	13	5	9	12	10	9	7	13	14	6	14	9	8	8	8	8	13	12	8	17	12	5	4	5	5	3	5	362	410	485	474	547	543	537	522	510	Abscisic acid receptor PYR1 [0.878] | Abscisic acid receptor PYL8 [0.051] | Abscisic acid receptor PYL9 [0.038] | Abscisic acid receptor PYL6 [0.013] | Abscisic acid receptor PYL4 [0.008] | Abscisic acid receptor PYL10 [0.004] | Abscisic acid receptor PYL7 [0.004] | Abscisic acid receptor PYL5 [0.004]	Polyketide cyclase/dehydrase and lipid transport superfamily protein | PYR1-like 11 | regulatory components of ABA receptor 3 | PYR1-like 4 | PYR1-like 1 | PYR1-like 3 | PYR1-like 12 | PYR1-like 10 | PYR1-like 2 | PYR1-like 7 | regulatory component of ABA receptor 1 | PYR1-like 6	Polyketide cyclase / dehydrase and lipid transport (PF10604) [0.983]	Polyketide cyclase/dehydrase (IPR019587) [0.983]	NULL / Representative annotation below 0.1%	NULL / Representative annotation below 0.1%	NULL / Representative annotation below 0.1%
OG235	7	7	10	9	8	7	8	13	13	8	13	7	10	12	6	9	9	9	8	22	9	7	7	3	8	7	11	56	75	91	155	121	141	134	132	125	Ubiquitin-conjugating enzyme E2 [0.369] | Ubiquitin-conjugating enzyme E2, putative [0.203] | Ubiquitin conjugating-like enzyme family protein [0.153] | Ubiquitin-conjugating enzyme [0.085] | Ubiquitin-conjugating enzyme E2-like protein [0.081] | Ubiquitin conjugating enzyme E2 [0.055] | Ubiquitin conjugating enzyme [0.021] | Ubiquitin-conjugating enzyme E2 E2 [0.013] | Ubiquitin-conjugating enzy…	ubiquitin conjugating enzyme 9 | Ubiquitin-conjugating enzyme family protein | ubiquitin conjugating enzyme 8 | ubiquitin-conjugating enzyme 11 | ubiquitin-conjugating enzyme 10 | ubiquitin-conjugating enzyme 30 | ubiquitin-conjugating enzyme 29	Ubiquitin-conjugating enzyme (PF00179) [0.958] | Glycosyl hydrolases family 17 (PF00332) [0.008] | X8 domain (PF07983) [0.008]	Ubiquitin-conjugating enzyme E2 (IPR000608) [0.958] | Glycoside hydrolase family 17 (IPR000490) [0.008] | X8 domain (IPR012946) [0.008]	hydrolase activity, hydrolyzing O-glycosyl compounds (GO:0004553) [0.008]	carbohydrate metabolic process (GO:0005975) [0.008]	NULL / Representative annotation below 0.1%
OG237	11	7	12	11	7	17	5	8	11	18	12	4	5	3	6	8	10	21	22	5	4	9	3	5	4	7	38	74	120	1180	1311	1362	1419	2060	2107	1023	Calcium-dependent phosphotriesterase superfamily protein [0.574] | Strictosidine synthase, putative [0.128] | Strictosidine synthase family protein [0.094] | Strictosidine synthase [0.072] | Strictosidine synthase 1 [0.047] | Strictosidine synthase-like protein [0.026] | Strictosidine synthase family protein, expressed [0.021] | Strictosidine synthase 3 [0.013] | Strictosidine synthase-like [0.00…	Calcium-dependent phosphotriesterase superfamily protein | strictosidine synthase-like 1 | strictosidine synthase-like 2 | strictosidine synthase-like 3 | strictosidine synthase 3 | strictosidine synthase 2	Strictosidine synthase (PF03088) [0.902] | FAR1 DNA-binding domain (PF03101) [0.004]	Strictosidine synthase, conserved region (IPR018119) [0.902] | FAR1 DNA binding domain (IPR004330) [0.004]	strictosidine synthase activity (GO:0016844) [0.902]	biosynthetic process (GO:0009058) [0.902]	NULL / Representative annotation below 0.1%
OG238	6	1	12	15	3	11	12	2	22	6	21	1	20	1	13	6	9	15	33	2	2	17	1	2	1	1	190	109	732	1555	1789	1896	1992	2061	2108	2148	Protease inhibitor [0.238] | Proteinase inhibitor [0.136] | Serine protease inhibitor, potato inhibitor I-type family protein [0.111] | Trypsin inhibitor family protein [0.085] | Chymotrypsin inhibitor [0.072] | Subtilisin inhibitor 1 [0.072] | Proteinase inhibitor, putative [0.060] | Proteinase inhibitor I [0.038] | Subtilisin inhibitor [0.030] | Chymotrypsin inhibitor-2 [0.026] | Proteinase inh…	Serine protease inhibitor, potato inhibitor I-type family protein	Potato inhibitor I family (PF00280) [0.996]	Proteinase inhibitor I13, potato inhibitor I (IPR000864) [0.996]	serine-type endopeptidase inhibitor activity (GO:0004867) [0.996]	response to wounding (GO:0009611) [0.996]	NULL / Representative annotation below 0.1%
OG239	11	7	8	9	11	12	8	11	13	5	9	9	8	10	9	11	11	12	11	14	2	7	7	4	8	7	1	13	12	9	13	2133	711	402	328	314	Glucan endo-1,3-beta-glucosidase, putative [0.782] | Glucan endo-1,3-beta-glucosidase [0.192] | Glucan endo-1 3-beta-glucosidase [0.026]	O-Glycosyl hydrolases family 17 protein	Glycosyl hydrolases family 17 (PF00332) [1.000] | X8 domain (PF07983) [0.970] | GDSL/SGNH-like Acyl-Esterase family found in Pmr5 and Cas1p (PF13839) [0.004] | RNA recognition motif. (a.k.a. RRM, RBD, or RNP domain) (PF00076) [0.004] | Aldehyde dehydrogenase family (PF00171) [0.004] | PMR5 N terminal Domain (PF14416) [0.004] | Zn-finger in Ran binding protein and others (PF00641) [0.004]	Glycoside hydrolase family 17 (IPR000490) [1.000] | X8 domain (IPR012946) [0.970] | PC-Esterase (IPR026057) [0.004] | PMR5 N-terminal domain (IPR025846) [0.004] | RNA recognition motif domain (IPR000504) [0.004] | Zinc finger, RanBP2-type (IPR001876) [0.004] | Aldehyde dehydrogenase domain (IPR015590) [0.004]	hydrolase activity, hydrolyzing O-glycosyl compounds (GO:0004553) [1.000] | zinc ion binding (GO:0008270) [0.004] | oxidoreductase activity (GO:0016491) [0.004] | nucleic acid binding (GO:0003676) [0.004]	carbohydrate metabolic process (GO:0005975) [1.000] | metabolic process (GO:0008152) [0.004] | oxidation-reduction process (GO:0055114) [0.004]	NULL / Representative annotation below 0.1%
OG240	11	6	7	8	10	9	7	11	10	16	12	8	12	12	11	7	6	11	10	16	4	6	6	3	4	11	118	394	632	662	670	658	1098	1099	1094	1099	Unkown protein / Representative AHRD below 0.1%	Protein of unknown function (DUF707)	Protein of unknown function (DUF707) (PF05212) [0.996] | SCAMP family (PF04144) [0.004] | Hydroxymethylglutaryl-coenzyme A synthase C terminal (PF08540) [0.004]	Protein of unknown function DUF707 (IPR007877) [0.996] | SCAMP (IPR007273) [0.004] | Hydroxymethylglutaryl-coenzyme A synthase C-terminal domain (IPR013746) [0.004]	hydroxymethylglutaryl-CoA synthase activity (GO:0004421) [0.004]	isoprenoid biosynthetic process (GO:0008299) [0.004] | protein transport (GO:0015031) [0.004]	integral component of membrane (GO:0016021) [0.004]
OG241	7	5	7	11	9	18	5	7	13	13	14	4	9	9	7	6	11	7	7	17	10	7	9	8	5	7	191	2	2	390	376	426	419	495	478	468	Mannan endo-1,4-beta-mannosidase [0.655] | Mannan endo-1,4-beta-mannosidase 1 [0.250] | Mannan endo-1,4-beta-mannosidase 4 [0.065] | Mannan endo-1,4-beta-mannosidase 6 [0.009] | Mannan endo-1,4-beta-mannosidase 2 [0.009] | Mannan endo-1,4-beta-mannosidase 5 [0.004] | Endo-1,4-beta-mannosidase protein 1 [0.004] | Mannan endo-1,4-beta-mannosidase 3 [0.004]	Glycosyl hydrolase superfamily protein	Cellulase (glycosyl hydrolase family 5) (PF00150) [0.888] | High-affinity nitrate transporter accessory (PF16974) [0.004] | WRKY DNA -binding domain (PF03106) [0.004]	Glycoside hydrolase, family 5 (IPR001547) [0.888] | WRKY domain (IPR003657) [0.004] | High-affinity nitrate transporter (IPR016605) [0.004]	hydrolase activity, hydrolyzing O-glycosyl compounds (GO:0004553) [0.888] | transcription factor activity, sequence-specific DNA binding (GO:0003700) [0.004] | sequence-specific DNA binding (GO:0043565) [0.004]	carbohydrate metabolic process (GO:0005975) [0.888] | response to nitrate (GO:0010167) [0.004] | regulation of transcription, DNA-templated (GO:0006355) [0.004] | nitrate transport (GO:0015706) [0.004]	NULL / Representative annotation below 0.1%
OG242	9	7	13	26	11	11	8	18	14	8	15	4	14	8	8	5	5	6	10	14	4	2	3	5	4	0	47	344	91	103	92	87	93	866	675	672	Bidirectional sugar transporter SWEET14 [0.172] | Bidirectional sugar transporter SWEET12 [0.147] | Bidirectional sugar transporter SWEET17 [0.138] | Bidirectional sugar transporter SWEET15 [0.129] | Bidirectional sugar transporter SWEET16 [0.108] | Bidirectional sugar transporter SWEET10 [0.082] | Bidirectional sugar transporter NEC1 [0.082] | Bidirectional sugar transporter SWEET13 [0.052] | Bi…	Nodulin MtN3 family protein | senescence-associated gene 29 | homolog of Medicago truncatula MTN3	Sugar efflux transporter for intercellular exchange (PF03083) [1.000] | Protein of unknown function, DUF538 (PF04398) [0.004]	SWEET sugar transporter (IPR004316) [1.000] | Protein of unknown function DUF538 (IPR007493) [0.004]	NULL / Representative annotation below 0.1%	NULL / Representative annotation below 0.1%	integral component of membrane (GO:0016021) [1.000]
OG243	3	2	6	18	5	13	9	5	20	8	10	0	6	4	14	5	3	5	10	9	2	2	6	46	15	5	1	15	13	24	20	16	13	SINGLETON	2201	2250	2-oxoglutarate (2OG) and Fe(II)-dependent oxygenase superfamily protein [0.965] | flavanone 3-hydroxylase [0.017] | 2-oxoglutarate ferrous-dependent oxygenase [0.009] | 2-oxoglutarate-iron(II)-dependent oxygenase [0.004] | Peroxisomal (S)-2-hydroxy-acid oxidase [0.004]	2-oxoglutarate (2OG) and Fe(II)-dependent oxygenase superfamily protein	2OG-Fe(II) oxygenase superfamily (PF03171) [0.944] | non-haem dioxygenase in morphine synthesis N-terminal (PF14226) [0.848] | Auxin responsive protein (PF02519) [0.004] | FMN-dependent dehydrogenase (PF01070) [0.004] | Exostosin family (PF03016) [0.004]	Oxoglutarate/iron-dependent dioxygenase (IPR005123) [0.944] | Non-haem dioxygenase N-terminal domain (IPR026992) [0.848] | Exostosin-like (IPR004263) [0.004] | Small auxin-up RNA (IPR003676) [0.004] | FMN-dependent dehydrogenase (IPR000262) [0.004]	oxidoreductase activity (GO:0016491) [0.948]	oxidation-reduction process (GO:0055114) [0.944] | response to auxin (GO:0009733) [0.004]	NULL / Representative annotation below 0.1%
OG244	8	8	9	10	14	10	7	16	9	8	8	6	9	7	7	15	7	7	6	16	12	5	7	13	3	4	1	1	56	47	48	48	234	531	515	416	MATE efflux family protein [1.000]	MATE efflux family protein	MatE (PF01554) [1.000]	Multi antimicrobial extrusion protein (IPR002528) [1.000]	drug transmembrane transporter activity (GO:0015238) [1.000] | antiporter activity (GO:0015297) [1.000]	transmembrane transport (GO:0055085) [1.000] | drug transmembrane transport (GO:0006855) [1.000]	membrane (GO:0016020) [1.000]
OG245	9	6	8	19	8	9	7	17	18	6	9	5	9	11	6	14	9	15	12	8	13	6	5	1	0	0	4	141	329	362	1092	852	858	838	838	834	cDNA, clone: J100026I16, full insert sequence [0.196] | mRNA, 952 bp sequence [0.070] | F15H18.19 [0.061] | Encodes a protein whose expression is responsive to nematode infection. [0.057] | plastid movement impaired 2 [0.048] | At1g21010 [0.030] | TMV response protein [0.030] | BEST Arabidopsis thaliana protein match is: plastid movement impaired 2 . [0.030] | Redox-regulatory protein FAM213A [0.…	Unkown protein(s) / No TAIR description(s)	Domain of unknown function (DUF4228) (PF14009) [0.991] | Nuf2 family (PF03800) [0.004]	Protein of unknown function DUF4228, plant (IPR025322) [0.991] | Kinetochore protein Nuf2 (IPR005549) [0.004]	NULL / Representative annotation below 0.1%	mitotic nuclear division (GO:0007067) [0.004]	chromosome, centromeric region (GO:0000775) [0.004]
OG246	1	2	5	11	14	21	7	8	9	18	4	2	3	1	10	4	4	6	17	18	16	1	3	17	4	24	20	356	367	352	341	318	314	307	288	277	Chalcone synthase [0.922] | Stilbene synthase [0.065] | Chalcone isomerase [0.004] | Chalcone synthase-like protein [0.004] | Chalcone synthase, putative [0.004]	Chalcone and stilbene synthase family protein	Chalcone and stilbene synthases, N-terminal domain (PF00195) [0.996] | Chalcone and stilbene synthases, C-terminal domain (PF02797) [0.878] | 3-Oxoacyl-[acyl-carrier-protein (ACP)] synthase III C terminal (PF08541) [0.013] | 3-Oxoacyl-[acyl-carrier-protein (ACP)] synthase III (PF08545) [0.009] | Chalcone-flavanone isomerase (PF02431) [0.004]	Chalcone/stilbene synthase, N-terminal (IPR001099) [0.996] | Chalcone/stilbene synthase, C-terminal (IPR012328) [0.878] | 3-Oxoacyl-[acyl-carrier-protein (ACP)] synthase III, C-terminal (IPR013747) [0.013] | 3-Oxoacyl-[acyl-carrier-protein (ACP)] synthase III (IPR013751) [0.009] | Chalcone isomerase (IPR016087) [0.004]	3-oxoacyl-[acyl-carrier-protein] synthase activity (GO:0004315) [0.009] | intramolecular lyase activity (GO:0016872) [0.004]	fatty acid biosynthetic process (GO:0006633) [0.009]	NULL / Representative annotation below 0.1%
OG247	12	8	6	10	9	14	11	11	11	9	9	7	8	9	10	8	7	7	9	14	7	9	7	9	4	4	26	4	5	5	346	40	47	34	32	29	Glycine-rich RNA-binding protein, putative [0.188] | RNA binding protein [0.166] | Glycine-rich RNA-binding protein [0.127] | RNA-binding family protein [0.122] | RNA-binding protein (Precursor) [0.096] | RNA binding protein, putative [0.087] | RNA-binding (RRM/RBD/RNP motifs) family protein [0.048] | RNA binding protein-like protein [0.048] | RNA-binding glycine-rich protein [0.035] | Glycine-ri…	RNA-binding (RRM/RBD/RNP motifs) family protein | glycine-rich RNA-binding protein 2 | RNA binding (RRM/RBD/RNP motifs) family protein | glycine-rich RNA-binding protein 4 | glycine-rich RNA-binding protein 5 | glycine-rich RNA-binding protein 3	RNA recognition motif. (a.k.a. RRM, RBD, or RNP domain) (PF00076) [0.987]	RNA recognition motif domain (IPR000504) [0.987]	nucleic acid binding (GO:0003676) [0.987]	NULL / Representative annotation below 0.1%	NULL / Representative annotation below 0.1%
OG248	9	5	10	13	13	14	10	17	15	2	12	10	10	7	9	7	9	8	7	5	5	7	9	0	5	11	2	526	540	554	462	1988	2116	2207	2277	2333	serine-rich protein-related [0.834] | Serine-rich family protein [0.079] | Serine-rich protein [0.022] | Delta-aminolevulinic acid dehydratase [0.004] | Coproporphyrinogen-III oxidase, aerobic [0.004] | ATP-dependent protease ATPase subunit HslU [0.004] | Leucine-rich repeat (LRR) family protein [0.004] | Glyceraldehyde-3-phosphate dehydrogenase, cytosolic [0.004] | 5-methyltetrahydropteroyltrigl…	serine-rich protein-related	Chromo (CHRromatin Organisation MOdifier) domain (PF00385) [0.004]	Chromo domain (IPR023780) [0.004]	NULL / Representative annotation below 0.1%	NULL / Representative annotation below 0.1%	NULL / Representative annotation below 0.1%
OG249	14	5	8	4	8	9	9	14	16	6	8	10	12	9	7	14	8	11	12	18	3	5	6	4	4	5	1	1	1	1	1	1867	1382	1391	1391	1410	Leucine-rich repeat (LRR) family protein [0.568] | Leucine-rich repeat family protein [0.249] | Leucine Rich Repeat family protein, expressed [0.087] | Leucine-rich repeat/extensin [0.039] | Leucine-rich repeat receptor protein kinase EXS [0.017] | Leucine-rich repeat receptor-like protein kinase family protein [0.013] | leucine-rich repeat/extensin 2 [0.009] | leucine-rich repeat/extensin 1 [0.0…	Leucine-rich repeat (LRR) family protein | leucine-rich repeat/extensin 1 | leucine-rich repeat/extensin 2	Leucine rich repeat (PF13855) [0.603] | Leucine rich repeat N-terminal domain (PF08263) [0.546] | Leucine Rich Repeat (PF00560) [0.083] | Leucine Rich repeat (PF13516) [0.031] | Lectin C-type domain (PF00059) [0.004] | Rapid ALkalinization Factor (RALF) (PF05498) [0.004]	Leucine-rich repeat (IPR001611) [0.664] | Leucine-rich repeat-containing N-terminal, plant-type (IPR013210) [0.546] | C-type lectin-like (IPR001304) [0.004] | Rapid ALkalinization Factor (IPR008801) [0.004]	protein binding (GO:0005515) [0.664]	NULL / Representative annotation below 0.1%	NULL / Representative annotation below 0.1%
OG250	16	3	12	17	17	13	9	9	11	21	13	1	2	3	9	3	16	15	9	11	4	2	10	1	1	1	29	104	2	2	1	2	2019	1067	343	229	NAD(P)-binding Rossmann-fold superfamily protein [1.000]	NAD(P)-binding Rossmann-fold superfamily protein | NAD-dependent epimerase/dehydratase family protein | senescence-associated gene 13 | tropinone reductase	Enoyl-(Acyl carrier protein) reductase (PF13561) [0.891] | short chain dehydrogenase (PF00106) [0.144]	Short-chain dehydrogenase/reductase SDR (IPR002347) [0.144]	NULL / Representative annotation below 0.1%	NULL / Representative annotation below 0.1%	NULL / Representative annotation below 0.1%
OG251	12	9	9	9	11	11	9	16	15	10	11	12	13	10	5	5	6	9	8	15	5	5	6	3	2	3	1	1	1	1	6	4	287	287	98	41	Protein kinase superfamily protein [0.699] | Kinase family protein [0.079] | Protein kinase family protein [0.074] | Cell division protein kinase 7, putative [0.031] | Cell division protein kinase [0.022] | Cell division protein kinase, putative [0.013] | ATP binding protein, putative [0.013] | cDNA clone:J013000M03, full insert sequence [0.009] | Serine/threonine protein kinase [0.009] | Transpo…	Protein kinase superfamily protein	Protein kinase domain (PF00069) [0.978] | Polysaccharide biosynthesis (PF04669) [0.004] | Legume lectin domain (PF00139) [0.004] | Pre-mRNA-splicing factor SF3a complex subunit 2 (Prp11) (PF16835) [0.004] | Zinc-finger of C2H2 type (PF12874) [0.004]	Protein kinase domain (IPR000719) [0.978] | Legume lectin domain (IPR001220) [0.004] | SF3A2 domain (IPR031781) [0.004] | Polysaccharide biosynthesis domain (IPR021148) [0.004]	ATP binding (GO:0005524) [0.978] | protein kinase activity (GO:0004672) [0.978] | carbohydrate binding (GO:0030246) [0.004]	protein phosphorylation (GO:0006468) [0.978]	NULL / Representative annotation below 0.1%
OG252	3	8	16	9	17	14	14	6	11	5	3	5	10	3	10	9	22	4	9	10	8	6	3	10	9	5	6	8	16	13	26	25	24	26	26	28	HXXXD-type acyl-transferase family protein [0.672] | hydroxycinnamoyl-CoA shikimate/quinate hydroxycinnamoyl transferase [0.131] | Hydroxycinnamoyl CoA quinate hydroxycinnamoyl transferase [0.079] | Hydroxycinnamoyl CoA shikimate/quinate hydroxycinnamoyltransferase [0.022] | Hydroxycinnamoyl transferase [0.022] | Hydroxycinnamoyl CoA quinate transferase [0.013] | Anthranilate N-benzoyltransferase…	spermidine hydroxycinnamoyl transferase | HXXXD-type acyl-transferase family protein | hydroxycinnamoyl-CoA shikimate/quinate hydroxycinnamoyl transferase	Transferase family (PF02458) [0.996] | Rapid ALkalinization Factor (RALF) (PF05498) [0.004] | Cytochrome P450 (PF00067) [0.004]	Transferase (IPR003480) [0.996] | Cytochrome P450 (IPR001128) [0.004] | Rapid ALkalinization Factor (IPR008801) [0.004]	transferase activity, transferring acyl groups other than amino-acyl groups (GO:0016747) [0.996] | oxidoreductase activity, acting on paired donors, with incorporation or reduction of molecular oxygen (GO:0016705) [0.004] | heme binding (GO:0020037) [0.004] | iron ion binding (GO:0005506) [0.004]	oxidation-reduction process (GO:0055114) [0.004]	NULL / Representative annotation below 0.1%
OG253	7	7	7	16	7	7	6	10	11	7	7	10	8	7	8	12	7	9	7	12	4	6	6	21	6	13	168	191	152	584	565	559	554	546	532	524	Heat shock protein 90 [0.741] | Heat shock family protein [0.127] | Heat shock protein, putative [0.096] | Heat-shock protein [0.018] | Chaperone protein htpG family protein [0.009] | Chaperone protein HtpG [0.004] | Heat shock protein [0.004]	Chaperone protein htpG family protein | heat shock protein 81-3 | HEAT SHOCK PROTEIN 81.4 | heat shock protein 90.1 | heat shock protein 81-2 | HEAT SHOCK PROTEIN 89.1	Hsp90 protein (PF00183) [0.952] | Histidine kinase-, DNA gyrase B-, and HSP90-like ATPase (PF02518) [0.838] | Histidine kinase-, DNA gyrase B-, and HSP90-like ATPase (PF13589) [0.039] | Late embryogenesis abundant protein 18 (PF10714) [0.004] | Family of unknown function (DUF566) (PF04484) [0.004]	Heat shock protein Hsp90 family (IPR001404) [0.952] | Histidine kinase-like ATPase, C-terminal domain (IPR003594) [0.838] | QWRF family (IPR007573) [0.004] | Late embryogenesis abundant protein, LEA-18 (IPR018930) [0.004]	unfolded protein binding (GO:0051082) [0.952] | ATP binding (GO:0005524) [0.952]	protein folding (GO:0006457) [0.952] | response to stress (GO:0006950) [0.952]	NULL / Representative annotation below 0.1%
OG254	9	6	9	8	14	12	9	18	19	6	10	11	9	4	4	8	6	10	10	14	11	4	6	0	2	9	44	131	778	808	121	848	853	833	832	828	Zinc finger family protein [0.351] | Zinc finger protein [0.132] | zinc-finger protein 10 [0.105] | SUPERMAN-like zinc finger protein [0.083] | Palmate-like pentafoliata 1 transcription factor [0.061] | EARS family protein [0.048] | C2H2-like zinc finger protein [0.031] | zinc finger protein 11 [0.022] | C2H2-type zinc finger protein-like protein [0.018] | C2H2 and C2HC zinc fingers superfamily p…	C2H2 and C2HC zinc fingers superfamily protein | zinc finger protein 11 | zinc-finger protein 10 | telomerase activator1	C2H2-type zinc finger (PF13912) [0.496]	NULL / Representative annotation below 0.1%	NULL / Representative annotation below 0.1%	NULL / Representative annotation below 0.1%	NULL / Representative annotation below 0.1%
OG255	2	18	21	6	5	9	20	14	22	1	19	15	17	1	0	0	1	0	0	1	2	5	10	18	0	20	1	1	1	1	2	17	12	11	9	7	Retrotransposon protein, putative, Ty1-copia subclass [0.119] | Polyprotein, putative [0.110] | Polyprotein [0.079] | CCHC-type integrase [0.053] | Retrotransposon polyprotein [0.053] | Retrotransposon like protein [0.044] | Integrase core domain containing protein [0.018] | Heat shock 70 kDa protein [0.018] | Copia-like polyprotein [0.018] | F24O1.21 [0.018] | Gag-Pol polyprotein [0.013] | 4-hyd…	Unkown protein(s) / No TAIR description(s)	gag-polypeptide of LTR copia-type (PF14223) [0.621] | gag-polypeptide of LTR copia-type (PF14244) [0.062] | Hsp70 protein (PF00012) [0.022] | No apical meristem (NAM) protein (PF02365) [0.009] | Protein kinase domain (PF00069) [0.004] | Replication factor-A C terminal domain (PF08646) [0.004] | Domain of unknown function (DUF4219) (PF13961) [0.004] | Cytochrome P450 (PF00067) [0.004]	Gag-polypeptide of LTR copia-type (IPR029472) [0.062] | Heat shock protein 70 family (IPR013126) [0.022] | NAC domain (IPR003441) [0.009] | Replication factor A, C-terminal (IPR013955) [0.004] | Cytochrome P450 (IPR001128) [0.004] | Protein kinase domain (IPR000719) [0.004] | Domain of unknown function DUF4219 (IPR025314) [0.004]	DNA binding (GO:0003677) [0.009] | iron ion binding (GO:0005506) [0.004] | ATP binding (GO:0005524) [0.004] | protein kinase activity (GO:0004672) [0.004] | heme binding (GO:0020037) [0.004] | oxidoreductase activity, acting on paired donors, with incorporation or reduction of molecular oxygen (GO:0016705) [0.004]	regulation of transcription, DNA-templated (GO:0006355) [0.009] | oxidation-reduction process (GO:0055114) [0.004] | protein phosphorylation (GO:0006468) [0.004]	NULL / Representative annotation below 0.1%
OG256	8	6	8	9	11	9	7	11	18	9	9	4	9	11	6	12	8	7	8	21	12	5	6	3	4	6	13	48	50	52	56	72	64	56	66	57	ACT domain repeat 4 [0.273] | ACT domain-containing family protein [0.203] | ACT domain repeat 3 [0.159] | ACT domain-containing protein [0.154] | ACT domain repeat 6 [0.070] | ACT domain containing protein, putative, expressed [0.048] | ACT domain repeat 1 [0.035] | ACT domain containing protein, expressed [0.022] | Bifunctional uridylyltransferase/uridylyl-removing enzyme [0.013] | ACT-domain r…	ACT domain repeat 7 | ACT domain repeat 1 | ACT domain repeat 6 | ACT-like superfamily protein | ACT domain repeat 8 | ACT domain repeat 5 | ACT domain repeat 3 | ACT domain repeat 4	ACT domain (PF01842) [0.930] | ACT domain (PF13740) [0.154]	ACT domain (IPR002912) [0.930]	amino acid binding (GO:0016597) [0.890]	metabolic process (GO:0008152) [0.890]	NULL / Representative annotation below 0.1%
OG257	9	11	21	42	6	10	15	26	26	5	7	1	10	7	6	0	17	0	0	0	1	1	5	1	0	0	6	8	16	13	1440	1147	556	308	289	233	HXXXD-type acyl-transferase family protein [1.000]	HXXXD-type acyl-transferase family protein	Transferase family (PF02458) [0.996] | Ribosomal protein L23 (PF00276) [0.004]	Transferase (IPR003480) [0.996] | Ribosomal protein L25/L23 (IPR013025) [0.004]	transferase activity, transferring acyl groups other than amino-acyl groups (GO:0016747) [0.996] | structural constituent of ribosome (GO:0003735) [0.004]	translation (GO:0006412) [0.004]	ribosome (GO:0005840) [0.004]
OG258	9	5	7	13	10	10	8	11	11	7	13	5	8	9	3	9	6	15	14	12	21	6	5	4	1	4	85	122	1518	1702	2011	2191	2346	2463	2554	2632	ATP-dependent Clp protease ATP-binding subunit ClpX [0.022] | 4-diphosphocytidyl-2-C-methyl-D-erythritol kinase [0.004] | WRKY DNA-binding protein 45 [0.004] | NADH-quinone oxidoreductase subunit I [0.004] | tRNA 2-thiocytidine biosynthesis protein TtcA [0.004]	Protein of unknown function (DUF1677)	Protein of unknown function (DUF1677) (PF07911) [1.000] | Ctr copper transporter family (PF04145) [0.004] | WRKY DNA -binding domain (PF03106) [0.004]	Protein of unknown function DUF1677, plant (IPR012876) [1.000] | WRKY domain (IPR003657) [0.004] | Ctr copper transporter (IPR007274) [0.004]	sequence-specific DNA binding (GO:0043565) [0.004] | transcription factor activity, sequence-specific DNA binding (GO:0003700) [0.004] | copper ion transmembrane transporter activity (GO:0005375) [0.004]	regulation of transcription, DNA-templated (GO:0006355) [0.004] | copper ion transmembrane transport (GO:0035434) [0.004]	integral component of membrane (GO:0016021) [0.004]
OG259	13	7	10	9	9	12	8	6	10	5	13	11	9	6	6	12	15	10	11	7	7	6	5	17	2	0	6	33	36	30	29	26	23	17	19	18	GDSL esterase/lipase [0.920] | GDSL esterase/lipase At2g31540 [0.009] | GDSL esterase/lipase At5g45950 [0.009] | GDSL esterase/lipase At2g42990 [0.009] | GDSL esterase/lipase At2g31550 [0.004] | Lipase SIL1-like protein [0.004] | GDSL esterase/lipase At4g26790 [0.004] | GDSL esterase/lipase At1g58430 [0.004] | GDSL esterase/lipase At2g30220 [0.004] | GDSL esterase/lipase At1g06990 [0.004] | GDSL …	GDSL-like Lipase/Acylhydrolase superfamily protein | GDSL-like Lipase/Acylhydrolase family protein | SGNH hydrolase-type esterase superfamily protein	GDSL-like Lipase/Acylhydrolase (PF00657) [0.965]	GDSL lipase/esterase (IPR001087) [0.965]	hydrolase activity, acting on ester bonds (GO:0016788) [0.965]	NULL / Representative annotation below 0.1%	NULL / Representative annotation below 0.1%
OG260	14	6	7	8	12	16	10	13	13	7	10	8	10	7	6	8	7	11	10	18	4	7	5	1	3	4	52	152	405	351	1039	1056	1069	1068	1061	1065	Sec14p-like phosphatidylinositol transfer family protein [1.000]	Sec14p-like phosphatidylinositol transfer family protein | SEC14-like 3 | SEC14-like 12	CRAL/TRIO domain (PF00650) [1.000] | CRAL/TRIO, N-terminal domain (PF03765) [0.782] | Xylanase inhibitor N-terminal (PF14543) [0.004] | Xylanase inhibitor C-terminal (PF14541) [0.004]	CRAL-TRIO lipid binding domain (IPR001251) [1.000] | CRAL/TRIO, N-terminal domain (IPR011074) [0.782] | Xylanase inhibitor, N-terminal (IPR032861) [0.004] | Xylanase inhibitor, C-terminal (IPR032799) [0.004]	NULL / Representative annotation below 0.1%	NULL / Representative annotation below 0.1%	NULL / Representative annotation below 0.1%
OG261	4	3	16	52	10	27	21	7	9	8	7	0	6	2	3	4	2	26	12	1	0	3	2	0	0	0	1	1	1	1	982	990	1003	993	993	994	Receptor-like protein kinase [0.462] | Leucine-rich repeat family protein [0.124] | Leucine Rich Repeat family protein, expressed [0.058] | Receptor-like protein 12 [0.053] | GbVe [0.049] | Verticillium wilt disease resistance protein [0.040] | Leucine Rich Repeat family protein [0.031] | Cf-4/9 disease resistance-like family protein [0.022] | Serine/threonine-protein kinase bri1, putative [0.022…	receptor like protein 48 | receptor like protein 28 | receptor like protein 6 | receptor like protein 7	Leucine rich repeat (PF13855) [0.951] | Leucine rich repeat N-terminal domain (PF08263) [0.804] | Leucine Rich Repeat (PF00560) [0.658] | Leucine Rich repeat (PF13516) [0.289] | Leucine Rich repeats (2 copies) (PF12799) [0.049] | Phosphatidylethanolamine-binding protein (PF01161) [0.004]	Leucine-rich repeat (IPR001611) [0.987] | Leucine-rich repeat-containing N-terminal, plant-type (IPR013210) [0.804] | Leucine rich repeat 4 (IPR025875) [0.049] | Phosphatidylethanolamine-binding protein (IPR008914) [0.004]	protein binding (GO:0005515) [0.987]	NULL / Representative annotation below 0.1%	NULL / Representative annotation below 0.1%
OG262	23	2	5	4	17	15	12	22	19	1	3	2	13	1	5	3	10	5	26	22	5	6	2	1	0	1	4	641	854	907	960	964	979	966	965	966	ROTUNDIFOLIA like 8 [0.151] | ROTUNDIFOLIA like 17 [0.107] | ROTUNDIFOLIA like 9 [0.089] | ROTUNDIFOLIA like 12 [0.089] | DVL family protein [0.076] | ROTUNDIFOLIA like 5 [0.067] | ROTUNDIFOLIA like 15 [0.067] | ROTUNDIFOLIA like 14 [0.058] | ROTUNDIFOLIA like 7 [0.053] | ROTUNDIFOLIA like 21 [0.044] | ROTUNDIFOLIA like 6 [0.044] | ROTUNDIFOLIA like 18 [0.018] | ROTUNDIFOLIA like 19 [0.013] | DVL…	ROTUNDIFOLIA like 13 | ROTUNDIFOLIA like 5 | ROTUNDIFOLIA like 4 | ROTUNDIFOLIA like 17 | ROTUNDIFOLIA like 12 | ROTUNDIFOLIA like 3 | ROTUNDIFOLIA like 8 | ROTUNDIFOLIA like 16 | ROTUNDIFOLIA like 10 | ROTUNDIFOLIA like 6 | ROTUNDIFOLIA like 21 | ROTUNDIFOLIA like 19 | ROTUNDIFOLIA like 1 | ROTUNDIFOLIA like 14 | ROTUNDIFOLIA like 2 | ROTUNDIFOLIA like 11 | ROTUNDIFOLIA like 18 | ROTUNDIFOLIA li…	DVL family (PF08137) [0.978] | Protein of unknown function (DUF3531) (PF12049) [0.004]	DVL (IPR012552) [0.978] | Protein of unknown function DUF3531 (IPR021920) [0.004]	NULL / Representative annotation below 0.1%	NULL / Representative annotation below 0.1%	NULL / Representative annotation below 0.1%
OG263	9	5	9	6	11	16	8	12	9	13	11	7	7	5	13	8	10	13	10	7	3	4	14	1	8	5	108	267	89	1288	1125	879	885	868	1174	1184	Amino acid transporter, putative [0.496] | Amino acid transporter family protein [0.259] | Transmembrane amino acid transporter family protein [0.098] | Amino acid transporter [0.076] | Amino acid transporter-like [0.027] | Black hull 4 [0.013] | Amino acid transporter protein-like [0.009] | Amino acid transporter family protein, putative, expressed [0.009] | Transmembrane amino acid transporter …	Transmembrane amino acid transporter family protein	Transmembrane amino acid transporter protein (PF01490) [0.996]	Amino acid transporter, transmembrane domain (IPR013057) [0.996]	NULL / Representative annotation below 0.1%	NULL / Representative annotation below 0.1%	NULL / Representative annotation below 0.1%
OG264	4	3	13	26	6	13	10	28	27	0	36	2	2	5	16	5	5	10	12	0	1	0	0	0	0	0	120	259	254	265	243	230	217	238	586	587	hydroxyproline-rich glycoprotein family protein [0.504] | Hydroxyproline-rich glycoprotein [0.223] | Extensin-like protein Ext1 (Precursor) [0.067] | Vegetative cell wall protein gp1 [0.054] | C protein immunoglobulin-A-binding beta antigen [0.049] | Early nodulin 75-like protein [0.031] | Bifunctional inhibitor/lipid-transfer protein/seed storage 2S albumin superfamily protein [0.022] | Periaxin…	hydroxyproline-rich glycoprotein family protein	Cornifin (SPRR) family (PF02389) [0.009] | PDDEXK-like family of unknown function (PF04720) [0.004]	Protein of unknown function PDDEXK-like (IPR006502) [0.004]	NULL / Representative annotation below 0.1%	NULL / Representative annotation below 0.1%	NULL / Representative annotation below 0.1%
OG265	127	18	40	9	1	0	8	0	19	0	0	0	0	0	0	0	0	0	1	0	0	0	0	0	0	1	148	102	95	90	79	66	55	79	2109	2149	Cysteine/Histidine-rich C1 domain family protein [0.991] | Arabidopsis phospholipase-like protein (PEARLI 4) family [0.009]	Cysteine/Histidine-rich C1 domain family protein | DC1 domain-containing protein | zinc ion binding | protein kinase C-like zinc finger protein | CHP-rich zinc finger protein-related	C1 domain (PF03107) [0.969] | Arabidopsis phospholipase-like protein (PEARLI 4) (PF05278) [0.009] | Universal stress protein family (PF00582) [0.004] | Plant organelle RNA recognition domain (PF11955) [0.004]	DC1 (IPR004146) [0.969] | Phospholipase-like (IPR007942) [0.009] | Plant organelle RNA recognition domain (IPR021099) [0.004] | UspA (IPR006016) [0.004]	NULL / Representative annotation below 0.1%	response to stress (GO:0006950) [0.004]	NULL / Representative annotation below 0.1%
OG266	14	8	8	7	12	10	7	11	11	9	11	8	13	6	8	10	5	13	11	11	11	6	5	1	3	4	5	25	2	2	1	2	589	199	SINGLETON	SINGLETON	Phytochrome-interacting factor 3 family protein [0.126] | DNA binding protein, putative [0.117] | BHLH transcription factor [0.085] | Transcription factor PIF1 [0.085] | Transcription factor UNE10 [0.067] | Transcription factor SPATULA [0.058] | Helix-loop-helix DNA-binding domain containing protein, expressed [0.054] | Transcription factor PIF3 [0.054] | Phytochrome-interacting factor, putative …	basic helix-loop-helix (bHLH) DNA-binding superfamily protein | phytochrome interacting factor 3 | phytochrome interacting factor 3-like 1 | phytochrome interacting factor 3-like 6 | phytochrome interacting factor 3-like 5 | phytochrome interacting factor 3-like 2 | phytochrome interacting factor 4 | phytochrome-interacting factor7	Helix-loop-helix DNA-binding domain (PF00010) [0.906] | Aldo/keto reductase family (PF00248) [0.004]	Myc-type, basic helix-loop-helix (bHLH) domain (IPR011598) [0.906] | NADP-dependent oxidoreductase domain (IPR023210) [0.004]	protein dimerization activity (GO:0046983) [0.906]	NULL / Representative annotation below 0.1%	NULL / Representative annotation below 0.1%
OG267	7	6	9	6	9	9	9	9	11	4	11	7	7	6	7	9	8	4	8	7	5	4	8	13	5	35	2	47	39	35	57	920	730	472	367	302	glyoxal oxidase-related protein [0.807] | Glyoxal oxidase-related protein [0.067] | Glyoxal oxidase [0.049] | Glyoxal oxidase-related family protein [0.049] | Glyoxal oxidase-like [0.013] | Glyoxal oxidase, putative, expressed [0.009] | Galactose oxidase [0.004]	glyoxal oxidase-related protein	Glyoxal oxidase N-terminus (PF07250) [1.000] | Domain of unknown function (DUF1929) (PF09118) [0.991] | Protein of unknown function (DUF1118) (PF06549) [0.004] | Glycosyl hydrolases family 16 (PF00722) [0.004] | Alcohol dehydrogenase GroES-like domain (PF08240) [0.004]	Glyoxal oxidase, N-terminal (IPR009880) [1.000] | Domain of unknown function DUF1929 (IPR015202) [0.964] | Galactose oxidase-like, Early set domain (IPR015202) [0.027] | Glycoside hydrolase family 16 (IPR000757) [0.004] | Protein of unknown function DUF1118 (IPR009500) [0.004] | Alcohol dehydrogenase, N-terminal (IPR013154) [0.004]	hydrolase activity, hydrolyzing O-glycosyl compounds (GO:0004553) [0.004]	oxidation-reduction process (GO:0055114) [0.004] | carbohydrate metabolic process (GO:0005975) [0.004]	NULL / Representative annotation below 0.1%
OG268	11	5	6	6	10	17	5	9	12	5	12	7	8	8	6	6	11	10	12	7	9	6	6	12	7	9	89	215	278	255	231	219	208	324	313	298	Histone H2B [0.986] | Histone H2B family protein [0.005] | Histone H2B.2 [0.005] | Histone h2b, putative [0.005]	Histone superfamily protein | histone B2	Core histone H2A/H2B/H3/H4 (PF00125) [0.982] | RNA recognition motif. (a.k.a. RRM, RBD, or RNP domain) (PF00076) [0.005]	Histone H2A/H2B/H3 (IPR007125) [0.982] | RNA recognition motif domain (IPR000504) [0.005]	DNA binding (GO:0003677) [0.982] | nucleic acid binding (GO:0003676) [0.005]	NULL / Representative annotation below 0.1%	NULL / Representative annotation below 0.1%
OG269	9	6	8	11	11	11	6	12	14	2	10	14	8	12	7	6	9	11	6	20	9	7	3	6	1	3	4	52	44	50	1924	2079	2224	2325	2406	2478	Basic-leucine zipper (bZIP) transcription factor family protein [0.491] | BZIP transcription factor family protein [0.261] | BZIP transcription factor [0.158] | BZIP family transcription factor family protein [0.018] | Basic/leucine zipper protein [0.014] | BZIP transcription factor ATB2 [0.009] | Transcription factor [0.009] | BZIP transcription factor bZIP60 [0.005] | basic leucine-zipper 7 [0.…	basic leucine-zipper 4 | basic leucine-zipper 44 | basic leucine-zipper 7 | basic region/leucine zipper motif 53 | basic leucine-zipper 2 | basic leucine-zipper 1 | G-box binding factor 6 | basic leucine-zipper 5 | basic leucine-zipper 6	bZIP transcription factor (PF00170) [0.923] | Basic region leucine zipper (PF07716) [0.050]	Basic-leucine zipper domain (IPR004827) [0.973]	transcription factor activity, sequence-specific DNA binding (GO:0003700) [0.973] | sequence-specific DNA binding (GO:0043565) [0.919]	regulation of transcription, DNA-templated (GO:0006355) [0.973]	NULL / Representative annotation below 0.1%
OG270	12	6	8	13	10	11	10	9	11	6	9	6	18	5	7	9	6	8	10	13	8	7	6	6	4	4	57	1	7	299	235	222	857	837	837	833	Zinc transporter [0.320] | Zinc transporter protein [0.275] | Zinc/iron transporter, putative [0.153] | Zinc transporter 4 [0.108] | Zinc transporter 7 family protein [0.023] | ZIP family transporter [0.014] | Zinc transporter 5 [0.014] | Zinc transporter protein ZIP1 [0.014] | Zinc transporter 3 [0.009] | Zinc transporter 1 [0.009] | Zinc transporter 7 [0.009] | Zinc transporter 9 [0.009] | zinc…	zinc transporter 1 precursor | zinc transporter 7 precursor | zinc transporter 12 precursor | ZIP metal ion transporter family | zinc transporter 8 precursor | iron regulated transporter 2 | zinc transporter 5 precursor | zinc transporter 3 precursor | iron regulated transporter 3 | zinc transporter 10 precursor | zinc transporter 4 precursor | iron-regulated transporter 1	ZIP Zinc transporter (PF02535) [1.000]	Zinc/iron permease (IPR003689) [1.000]	metal ion transmembrane transporter activity (GO:0046873) [1.000]	transmembrane transport (GO:0055085) [1.000] | metal ion transport (GO:0030001) [1.000]	membrane (GO:0016020) [1.000]
OG271	8	5	6	12	11	7	9	28	19	6	13	10	12	9	6	7	5	6	9	9	7	1	4	2	6	5	15	334	301	295	356	329	396	381	365	357	Auxin-responsive family protein [0.685] | Auxin induced-like protein [0.176] | auxin-responsive family protein [0.099] | Cytochrome b561/ferric reductase transmembrane with DOMON related domain [0.009] | Auxin-induced in root cultures protein [0.009] | AIR12 [0.005] | Auxin-induced protein-like [0.005] | Dopamine beta-monooxygenase [0.005] | Membrane protein [0.005] | Membrane protein, putative, …	Auxin-responsive family protein | Cytochrome b561/ferric reductase transmembrane with DOMON related domain | auxin-responsive family protein	Protein of unknown function (DUF568) (PF04526) [0.937] | Eukaryotic cytochrome b561 (PF03188) [0.608]	DOMON domain (IPR005018) [0.937] | Cytochrome b561/ferric reductase transmembrane (IPR006593) [0.608]	NULL / Representative annotation below 0.1%	NULL / Representative annotation below 0.1%	NULL / Representative annotation below 0.1%
OG272	9	7	9	7	11	11	9	12	15	7	10	10	12	11	4	9	6	9	10	15	2	6	6	3	4	7	49	361	327	569	867	870	879	861	860	858	Serine/threonine protein phosphatase 2A regulatory subunit B [0.747] | Serine/threonine protein phosphatase 2A 57 kDa regulatory subunit B' iota isoform [0.240] | Protein phosphatase 2A regulatory B subunit family protein [0.005] | Serine/threonine protein phosphatase 2A 57 kDa regulatory subunit B' epsilon isoform [0.005] | Serine/threonine protein phosphatase 2A 57 kDa regulatory subunit B' bet…	Protein phosphatase 2A regulatory B subunit family protein | serine/threonine protein phosphatase 2A 55 kDa regulatory subunit B prime delta	Protein phosphatase 2A regulatory B subunit (B56 family) (PF01603) [1.000]	Protein phosphatase 2A, regulatory B subunit, B56 (IPR002554) [1.000]	protein phosphatase regulator activity (GO:0019888) [1.000]	signal transduction (GO:0007165) [1.000]	protein phosphatase type 2A complex (GO:0000159) [1.000]
OG273	0	0	0	0	0	16	7	0	0	0	0	0	2	42	5	0	87	21	34	0	0	0	0	0	0	7	160	18	918	1247	1399	1473	1537	1572	1587	1613	NAM-like protein-like [0.317] | NAM-like protein [0.195] | glutathione S-transferase THETA 3 [0.050] | Cytokinin inducibl protein-like [0.050] | Cytokinin inducibl protein-like protein [0.032] | glutathione S-transferase THETA 2 [0.027] | Glutathione transferase-like protein [0.027] | Myb family protein-like protein [0.027] | Cytokinin inducible protein-like [0.023] | Transposon protein, putative…	Unkown protein(s) / No TAIR description(s)	No apical meristem-associated C-terminal domain (PF14303) [0.665] | ATP synthase subunit C (PF00137) [0.005] | HIT domain (PF01230) [0.005] | F-box domain (PF00646) [0.005] | Chlorophyll A-B binding protein (PF00504) [0.005]	No apical meristem-associated, C-terminal domain (IPR029466) [0.665] | F-box domain (IPR001810) [0.005] | V-ATPase proteolipid subunit C-like domain (IPR002379) [0.005] | Chlorophyll A-B binding protein (IPR022796) [0.005] | Histidine triad (HIT) protein (IPR001310) [0.005]	protein binding (GO:0005515) [0.005] | hydrogen ion transmembrane transporter activity (GO:0015078) [0.005]	ATP hydrolysis coupled proton transport (GO:0015991) [0.005]	proton-transporting two-sector ATPase complex, proton-transporting domain (GO:0033177) [0.005]
OG274	7	5	10	15	6	23	5	7	7	5	63	6	5	6	4	6	4	8	6	10	8	1	2	1	0	0	50	45	37	36	36	33	28	24	22	19	Adenylate isopentenyltransferase [0.609] | tRNA dimethylallyltransferase [0.295] | Adenylate dimethylallyltransferase, putative [0.023] | tRNA isopentenyltransferase [0.018] | TRNA ISOPENTENYLTRANSFERASE family protein [0.014] | Adenylate isopentenyltransferase 8, chloroplastic [0.005] | Adenylate isopentenyltransferase 6, chloroplastic [0.005] | Adenylate isopentenyltransferase 1, chloroplastic …	isopentenyltransferase 7 | isopentenyltransferase 3 | ATP/ADP isopentenyltransferases | isopentenyltransferase 1 | isopentenyltransferase 6 | isopentenyltransferase 4 | isopentenyltransferase 5	IPP transferase (PF01715) [0.759] | Isopentenyl transferase (PF01745) [0.114] | Papain family cysteine protease (PF00112) [0.005]	tRNA dimethylallyltransferase (IPR018022) [0.759] | Adenylate dimethylallyltransferase (IPR002648) [0.114] | Peptidase C1A, papain C-terminal (IPR000668) [0.005]	dimethylallyltranstransferase activity (GO:0004161) [0.114] | cysteine-type peptidase activity (GO:0008234) [0.005]	tRNA processing (GO:0008033) [0.759] | biosynthetic process (GO:0009058) [0.114] | proteolysis (GO:0006508) [0.005]	NULL / Representative annotation below 0.1%
OG275	0	5	9	30	12	18	10	10	12	12	2	0	2	0	8	8	0	30	14	4	5	18	5	2	2	1	1	1	1	1	2	1	1	1	1	1	Serine/threonine-protein kinase [0.557] | Receptor-like protein kinase [0.333] | Kinase-like protein [0.064] | Serine-threonine protein kinase, plant-type, putative [0.032] | Pentatricopeptide repeat-containing family protein [0.005] | Cysteine-rich receptor-like protein kinase [0.005] | S-domain receptor-like protein kinase-like [0.005]	Unkown protein(s) / No TAIR description(s)	Protein kinase domain (PF00069) [0.886] | D-mannose binding lectin (PF01453) [0.863] | S-locus glycoprotein domain (PF00954) [0.831] | PAN-like domain (PF08276) [0.297] | PAN domain (PF00024) [0.087] | Protein tyrosine kinase (PF07714) [0.018] | PAN domain (PF14295) [0.005] | Chromo (CHRromatin Organisation MOdifier) domain (PF00385) [0.005] | Plant organelle RNA recognition domain (PF11955) [0.0…	Protein kinase domain (IPR000719) [0.886] | Bulb-type lectin domain (IPR001480) [0.863] | S-locus glycoprotein domain (IPR000858) [0.831] | PAN/Apple domain (IPR003609) [0.384] | Serine-threonine/tyrosine-protein kinase, catalytic domain (IPR001245) [0.018] | Plant organelle RNA recognition domain (IPR021099) [0.005] | Chromo domain (IPR023780) [0.005]	protein kinase activity (GO:0004672) [0.895] | ATP binding (GO:0005524) [0.886]	protein phosphorylation (GO:0006468) [0.895] | recognition of pollen (GO:0048544) [0.831]	NULL / Representative annotation below 0.1%
OG276	6	5	9	27	10	17	5	13	14	3	19	7	14	8	6	7	10	13	6	2	1	1	6	8	2	0	5	442	495	412	399	460	1519	SINGLETON	SINGLETON	SINGLETON	Eukaryotic aspartyl protease family protein [0.954] | Xyloglucan specific endoglucanase inhibitor [0.014] | Xyloglucan-specific endoglucanase inhibitor protein [0.009] | Xylanase inhibitor [0.009] | Xyloglucan-specific endoglucanase inhibitor 9 [0.005] | Basic 7S globulin 2 small subunit, putative [0.005] | Xyloglucan-specific endoglucanase inhibitor 1 [0.005]	Eukaryotic aspartyl protease family protein	Xylanase inhibitor C-terminal (PF14541) [0.977] | Xylanase inhibitor N-terminal (PF14543) [0.918] | LSM domain (PF01423) [0.005]	Xylanase inhibitor, C-terminal (IPR032799) [0.977] | Xylanase inhibitor, N-terminal (IPR032861) [0.918] | LSM domain, eukaryotic/archaea-type (IPR001163) [0.005]	NULL / Representative annotation below 0.1%	NULL / Representative annotation below 0.1%	NULL / Representative annotation below 0.1%
OG277	5	6	7	7	8	9	7	10	12	9	9	5	14	8	9	10	9	8	5	14	10	7	7	2	7	14	70	80	61	63	86	112	119	109	102	95	Homeodomain-like superfamily protein [0.505] | Myb family transcription factor family protein [0.161] | Myb family transcription factor [0.092] | MYB transcription factor [0.083] | Myb family transcription factor-related protein [0.046] | myb-like HTH transcriptional regulator family protein [0.041] | MYB-like transcription factor [0.037] | Myb family transcription factor APL [0.014] | MYB-CC typ…	Homeodomain-like superfamily protein | myb-like HTH transcriptional regulator family protein	MYB-CC type transfactor, LHEQLE motif (PF14379) [0.899] | Myb-like DNA-binding domain (PF00249) [0.876]	MYB-CC type transcription factor, LHEQLE-containing domain (IPR025756) [0.899] | SANT/Myb domain (IPR001005) [0.876]	NULL / Representative annotation below 0.1%	NULL / Representative annotation below 0.1%	NULL / Representative annotation below 0.1%
OG278	13	6	9	9	10	10	9	11	10	5	9	7	10	6	7	9	5	11	12	10	4	7	6	11	11	0	34	29	20	16	22	14	16	12	10	14	Peroxidase [0.373] | Peroxidase family protein [0.300] | Peroxidase superfamily protein [0.171] | Peroxidase, putative [0.032] | Peroxidase 19, putative [0.023] | Peroxidase 16 [0.018] | Class III peroxidase 92 [0.009] | Peroxidase 73 [0.009] | Disease resistance-like protein GS6-2 [0.009] | Peroxidase 65 [0.009] | Peroxidase 6 family protein [0.005] | Peroxidase 63 family protein [0.005] | Perox…	Peroxidase superfamily protein | root hair specific 19 | Peroxidase family protein	Peroxidase (PF00141) [0.995]	Haem peroxidase, plant/fungal/bacterial (IPR002016) [0.995]	heme binding (GO:0020037) [0.995] | peroxidase activity (GO:0004601) [0.995]	oxidation-reduction process (GO:0055114) [0.995] | response to oxidative stress (GO:0006979) [0.995]	NULL / Representative annotation below 0.1%
OG280	9	5	3	6	9	9	8	5	11	5	5	10	8	9	3	9	5	9	13	14	7	8	5	35	1	5	154	420	456	460	450	638	637	624	614	615	Nucleotide-diphospho-sugar transferase family protein [0.995] | Ribulose bisphosphate carboxylase large chain [0.005]	Nucleotide-diphospho-sugar transferase family protein	Nucleotide-diphospho-sugar transferase (PF03407) [0.981] | Tubulin binding cofactor A (PF02970) [0.005]	Nucleotide-diphospho-sugar transferase (IPR005069) [0.981] | Tubulin binding cofactor A (IPR004226) [0.005]	beta-tubulin binding (GO:0048487) [0.005]	tubulin complex assembly (GO:0007021) [0.005] | post-chaperonin tubulin folding pathway (GO:0007023) [0.005]	NULL / Representative annotation below 0.1%
OG281	13	6	7	6	11	18	7	9	11	8	8	8	8	7	5	10	11	9	7	13	8	10	6	2	2	6	3	14	7	6	451	377	519	512	495	783	Myb [0.375] | Myb-like protein [0.130] | Myb, putative [0.111] | myb domain protein 119 [0.088] | myb domain protein 98 [0.074] | myb domain protein 118 [0.028] | Homeodomain-related [0.028] | Transcription factor myb [0.019] | Myb119, putative [0.019] | MYB transcription factor-like [0.014] | Myb-related protein 3R-1 [0.014] | myb domain protein 64 [0.014] | Myb family transcription factor famil…	myb domain protein 22 | Homeodomain-like protein | myb domain protein 98 | myb domain protein 100 | myb domain protein 3r2 | myb domain protein 118 | myb domain protein 3r-3 | myb domain protein 3r-4 | myb domain protein 3r-5 | myb domain protein 115 | Homeodomain-like superfamily protein | myb domain protein 119 | myb domain protein 64	Myb-like DNA-binding domain (PF00249) [0.676] | Myb-like DNA-binding domain (PF13921) [0.398] | MoaE protein (PF02391) [0.009] | Protein of unknown function (DUF3741) (PF12552) [0.005] | Domain of unknown function (DUF4378) (PF14309) [0.005] | Metallothionein (PF01439) [0.005]	SANT/Myb domain (IPR001005) [0.676] | Molybdopterin biosynthesis MoaE (IPR003448) [0.009] | Metallothionein, family 15, plant (IPR000347) [0.005] | Domain of unknown function DUF3741 (IPR022212) [0.005] | Domain of unknown function DUF4378 (IPR025486) [0.005]	metal ion binding (GO:0046872) [0.005]	Mo-molybdopterin cofactor biosynthetic process (GO:0006777) [0.009]	NULL / Representative annotation below 0.1%
OG282	6	4	7	12	6	8	6	9	9	5	8	7	6	5	3	3	7	17	26	15	14	14	6	7	2	4	150	502	882	1181	1312	1363	SINGLETON	SINGLETON	SINGLETON	SINGLETON	Biosynthetic arginine decarboxylase [0.005]	Protein of unknown function, DUF538	Protein of unknown function, DUF538 (PF04398) [0.995] | Pyridoxal-dependent decarboxylase, pyridoxal binding domain (PF02784) [0.005]	Protein of unknown function DUF538 (IPR007493) [0.995] | Orn/DAP/Arg decarboxylase 2, N-terminal (IPR022644) [0.005]	catalytic activity (GO:0003824) [0.005]	NULL / Representative annotation below 0.1%	NULL / Representative annotation below 0.1%
OG283	7	6	7	36	8	13	12	11	14	4	6	7	5	9	8	2	1	10	28	6	5	2	1	0	2	6	39	34	14	12	12	57	56	29	23	20	Scarecrow transcription factor family protein [0.528] | GRAS family transcription factor [0.227] | GRAS family transcription factor containing protein, expressed [0.208] | Transcription factor, putative [0.014] | GRAS family transcription factor containing protein [0.009] | SCARECROW-like protein [0.005] | GRAS transcription factor [0.005] | GRAS family protein [0.005]	GRAS family transcription factor | SCARECROW-like 14	GRAS domain family (PF03514) [1.000]	Transcription factor GRAS (IPR005202) [1.000]	NULL / Representative annotation below 0.1%	NULL / Representative annotation below 0.1%	NULL / Representative annotation below 0.1%
OG284	10	0	7	0	0	41	1	17	4	0	26	2	1	7	1	0	50	42	7	0	0	0	0	0	0	0	1	1	3	3	3	38	1956	1392	994	995	General transcription factor 2-related zinc finger protein [0.282] | TTF-type zinc finger protein with HAT dimerisation domain [0.282] | Zinc finger MYM-type protein [0.241] | HAT family dimerization domain containing protein [0.106] | HAT family dimerisation domain containing protein [0.037] | Helix-loop-helix DNA-binding domain containing protein [0.009] | Ubiquitin carboxyl-terminal hydrolase …	General transcription factor 2-related zinc finger protein | TTF-type zinc finger protein with HAT dimerisation domain	Domain of unknown function (DUF4371) (PF14291) [0.611] | hAT family C-terminal dimerisation region (PF05699) [0.301] | Domain of unknown function (PF13962) [0.005] | Frigida-like protein (PF07899) [0.005] | NB-ARC domain (PF00931) [0.005] | Leucine rich repeat N-terminal domain (PF08263) [0.005]	Domain of unknown function DUF4371 (IPR025398) [0.611] | HAT, C-terminal dimerisation domain (IPR008906) [0.301] | NB-ARC (IPR002182) [0.005] | Leucine-rich repeat-containing N-terminal, plant-type (IPR013210) [0.005] | PGG domain (IPR026961) [0.005] | Frigida-like (IPR012474) [0.005]	protein dimerization activity (GO:0046983) [0.301] | ADP binding (GO:0043531) [0.005]	NULL / Representative annotation below 0.1%	NULL / Representative annotation below 0.1%
OG285	0	2	1	0	2	198	0	10	2	0	1	0	0	0	0	0	0	0	0	0	0	0	0	0	0	0	30	40	100	108	1790	1897	1993	2062	2110	2150	Polynucleotidyl transferase, Ribonuclease H fold [0.694] | Polynucleotidyl transferase, ribonuclease H-like superfamily protein [0.144] | nuclear poly(a) polymerase [0.005] | Valine--tRNA ligase [0.005] | Zinc finger protein [0.005] | Chromosomal replication initiator protein DnaA [0.005] | Pentatricopeptide repeat-containing protein [0.005] | RNA-directed DNA polymerase (reverse transcriptase)-r…	Unkown protein(s) / No TAIR description(s)	Reverse transcriptase-like (PF13456) [0.306] | Protein kinase domain (PF00069) [0.005] | IBR domain, a half RING-finger domain (PF01485) [0.005] | Cullin protein neddylation domain (PF10557) [0.005] | Aminotransferase class-III (PF00202) [0.005] | Sugar (and other) transporter (PF00083) [0.005]	Cullin protein, neddylation domain (IPR019559) [0.005] | IBR domain (IPR002867) [0.005] | Aminotransferase class-III (IPR005814) [0.005] | Major facilitator, sugar transporter-like (IPR005828) [0.005] | Protein kinase domain (IPR000719) [0.005]	ATP binding (GO:0005524) [0.005] | protein kinase activity (GO:0004672) [0.005] | transmembrane transporter activity (GO:0022857) [0.005] | pyridoxal phosphate binding (GO:0030170) [0.005] | transaminase activity (GO:0008483) [0.005]	protein phosphorylation (GO:0006468) [0.005] | transmembrane transport (GO:0055085) [0.005]	integral component of membrane (GO:0016021) [0.005]
OG286	9	7	8	6	7	7	7	8	15	7	9	7	8	9	8	9	9	9	9	10	9	9	6	6	7	10	11	13	12	9	13	11	17	25	68	152	60 kDa chaperonin [0.870] | Chaperonin-60 kDa protein [0.102] | chaperonin 60 beta [0.014] | 60 kDa chaperonin alpha subunit [0.005] | 60 kDa chaperonin beta subunit [0.005] | phosphate transporter 1;1 [0.005]	TCP-1/cpn60 chaperonin family protein | heat shock protein 60-3A | heat shock protein 60 | chaperonin 60 beta | heat shock protein 60-2 | chaperonin-60alpha	TCP-1/cpn60 chaperonin family (PF00118) [1.000] | Mitochondrial carrier protein (PF00153) [0.005] | Glycosyl hydrolases family 17 (PF00332) [0.005] | Glycine cleavage H-protein (PF01597) [0.005] | Sugar (and other) transporter (PF00083) [0.005]	Chaperonin Cpn60/TCP-1 family (IPR002423) [1.000] | Major facilitator, sugar transporter-like (IPR005828) [0.005] | Mitochondrial substrate/solute carrier (IPR018108) [0.005] | Glycine cleavage system H-protein/Simiate (IPR033753) [0.005] | Glycoside hydrolase family 17 (IPR000490) [0.005]	ATP binding (GO:0005524) [1.000] | transmembrane transporter activity (GO:0022857) [0.005] | hydrolase activity, hydrolyzing O-glycosyl compounds (GO:0004553) [0.005]	transmembrane transport (GO:0055085) [0.005] | carbohydrate metabolic process (GO:0005975) [0.005]	integral component of membrane (GO:0016021) [0.005]
OG287	0	1	58	0	3	43	0	1	2	1	0	60	0	12	14	0	0	1	0	8	0	0	2	3	1	5	113	286	255	157	623	608	604	762	1441	1462	Gag/pol polyprotein [0.172] | Pol-polyprotein [0.130] | Retrotransposon protein, putative, unclassified [0.116] | Retrotransposon protein, putative, Ty3-gypsy subclass [0.065] | RNA-directed DNA polymerase (Reverse transcriptase); Ribonuclease H [0.065] | RNA-directed DNA polymerase (Reverse transcriptase), Ribonuclease H [0.051] | Pol polyprotein [0.047] | Ribonuclease H [0.047] | Gag-pol polypr…	Unkown protein(s) / No TAIR description(s)	Integrase core domain (PF00665) [0.279] | Reverse transcriptase-like (PF13456) [0.167] | Reverse transcriptase (RNA-dependent DNA polymerase) (PF00078) [0.070] | G-patch domain (PF01585) [0.009] | Annexin (PF00191) [0.005] | Hsp70 protein (PF00012) [0.005] | Aminotransferase class I and II (PF00155) [0.005]	Integrase, catalytic core (IPR001584) [0.279] | Reverse transcriptase domain (IPR000477) [0.070] | G-patch domain (IPR000467) [0.009] | Aminotransferase, class I/classII (IPR004839) [0.005] | Annexin repeat (IPR018502) [0.005] | Heat shock protein 70 family (IPR013126) [0.005]	nucleic acid binding (GO:0003676) [0.009] | calcium ion binding (GO:0005509) [0.005] | calcium-dependent phospholipid binding (GO:0005544) [0.005] | pyridoxal phosphate binding (GO:0030170) [0.005]	DNA integration (GO:0015074) [0.279] | biosynthetic process (GO:0009058) [0.005]	NULL / Representative annotation below 0.1%
OG288	6	9	8	20	13	10	14	10	8	4	7	5	7	11	5	5	7	13	17	9	7	3	9	3	4	1	30	40	43	43	41	871	467	273	120	127	Major facilitator superfamily protein [0.521] | Sugar transporter, putative [0.298] | Sorbitol transporter [0.051] | Sugar transporter [0.033] | Sugar transporter family protein [0.028] | Sorbitol-like transporter [0.028] | Polyol transporter [0.014] | Sugar transporter family protein, expressed [0.009] | polyol/monosaccharide transporter 5 [0.005] | BvcDNA-205 protein [0.005] | Polyol transporte…	Major facilitator superfamily protein | polyol/monosaccharide transporter 5 | polyol/monosaccharide transporter 2 | polyol/monosaccharide transporter 1	Sugar (and other) transporter (PF00083) [1.000] | Transcriptional repressor, ovate (PF04844) [0.005]	Major facilitator, sugar transporter-like (IPR005828) [1.000] | Ovate protein family, C-terminal (IPR006458) [0.005]	transmembrane transporter activity (GO:0022857) [1.000]	transmembrane transport (GO:0055085) [1.000]	integral component of membrane (GO:0016021) [1.000]
OG289	11	5	6	16	8	16	6	11	10	13	6	9	9	8	5	6	7	10	11	17	7	4	4	2	5	2	6	138	114	137	152	141	136	130	130	123	Unkown protein / Representative AHRD below 0.1%	Protein of Unknown Function (DUF239) | NEP-interacting protein 1	Domain of unknown function (DUF239) (PF03080) [0.958] | Domain of unknown function (DUF4409) (PF14365) [0.935] | Neprosin (PF03080) [0.037] | Neprosin activation peptide (PF14365) [0.033]	Neprosin (IPR004314) [0.995] | Neprosin activation peptide (IPR025521) [0.967]	NULL / Representative annotation below 0.1%	NULL / Representative annotation below 0.1%	NULL / Representative annotation below 0.1%
OG290	10	6	8	8	12	13	8	13	15	8	9	10	8	10	10	8	6	7	6	12	5	6	5	5	4	2	1	1	1	1	2	189	211	225	SINGLETON	SINGLETON	Kinase, putative [0.664] | Kinase family protein [0.192] | With no lysine kinase [0.033] | Protein kinase [0.028] | Protein kinase superfamily protein [0.014] | cDNA clone:J013107M03, full insert sequence [0.014] | with no lysine (K) kinase 5 [0.005] | with no lysine (K) kinase 3 [0.005] | Mitogen-activated protein kinase [0.005] | Serine/threonine protein kinase WNK8 [0.005] | with no lysine (K)…	Protein kinase superfamily protein | with no lysine (K) kinase 10 | with no lysine (K) kinase 6 | with no lysine (K) kinase 5 | with no lysine (K) kinase 2 | with no lysine (K) kinase 3 | with no lysine (K) kinase 8 | with no lysine (K) kinase 4 | with no lysine (K) kinase 1	Protein kinase domain (PF00069) [0.991] | Oxidative-stress-responsive kinase 1 C-terminal domain (PF12202) [0.019] | K-box region (PF01486) [0.005] | SRF-type transcription factor (DNA-binding and dimerisation domain) (PF00319) [0.005]	Protein kinase domain (IPR000719) [0.991] | Serine/threonine-protein kinase OSR1/WNK, CCT domain (IPR024678) [0.019] | Transcription factor, K-box (IPR002487) [0.005] | Transcription factor, MADS-box (IPR002100) [0.005]	ATP binding (GO:0005524) [0.991] | protein kinase activity (GO:0004672) [0.991] | protein serine/threonine kinase activity (GO:0004674) [0.019] | protein dimerization activity (GO:0046983) [0.005] | DNA binding (GO:0003677) [0.005] | transcription factor activity, sequence-specific DNA binding (GO:0003700) [0.005]	protein phosphorylation (GO:0006468) [0.991] | regulation of transcription, DNA-templated (GO:0006355) [0.005]	nucleus (GO:0005634) [0.005]
[truncated: 9,380 more rows]

## Sheet: SupTable9.Mealeae_gene_count
Supplemental Table 9: Maleae CROG gene count matrix
OG_ID	Malba	Md_Gala	Md_GDDH	Md_GDv1	Md_HF	Malsi	Malsy	Pyrbe	Pyrco_BPDH	Pyrco_BPv1	Pyrco_DAP	Pyrpy_C	Pyrpy_N	PyrUsCo	Pyrbr
OG1	211	211	231	168	216	208	213	221	203	231	257	244	228	196	290
OG2	221	301	314	202	233	236	224	228	219	355	289	172	281	190	344
OG3	201	201	253	163	192	217	201	270	182	234	234	221	272	196	215
OG4	299	373	351	222	247	214	273	285	338	178	398	266	202	271	451
OG5	141	159	192	131	143	161	122	184	134	194	196	132	162	162	116
OG6	227	356	407	187	222	252	261	310	249	382	395	282	302	277	330
OG7	141	77	147	95	132	79	128	157	109	146	130	156	164	153	175
OG8	119	156	213	116	106	134	133	174	112	165	126	144	159	139	183
OG9	154	176	172	126	161	176	171	169	124	156	199	183	168	150	165
OG10	105	56	101	67	80	63	62	104	57	88	73	113	114	97	87
OG11	130	150	116	70	101	132	124	129	89	114	112	110	182	125	128
OG12	96	106	111	87	83	110	93	105	82	106	107	87	115	83	70
OG13	125	116	119	79	116	111	114	119	97	114	121	125	121	100	134
OG14	70	78	97	57	72	83	69	82	47	70	74	76	70	66	69
OG16	50	75	72	34	72	81	67	74	45	57	83	58	73	56	80
[truncated: 9,641 more rows]

## Sheet: SupTable10.Other_Rosaceae
Supplemental Table 10: CROG gene count matrix of other Rosaceae genomes studied in this manuscript
[truncated: 9,657 more rows]

[truncated: 1 more sheets: SupTable11.hot_zone_and annot]
